# Supplementary material for: Smoking Suppresses the Therapeutic Potential of Adipose Stem Cells in Crohn’s Disease Patients through Epigenetic Changes
Source: MDPI journal article supplement (doi:10.3390/cells12071021), 2023-03-27
Supplement: s1 [file s1]

**Supplementary Table S1.** Demographic characteristics and clinical data of patients.

|                                              | Healthy         | Crohn's Disease  |                   |                   |
|----------------------------------------------|-----------------|------------------|-------------------|-------------------|
|                                              | Non-smokers     | Non-Smokers      | Smokers           | Ex-Smokers        |
| n                                            | 4               | 7                | 11                | 9                 |
| Disease status (Active /Inactive)            | -               | 6/1              | 9/2               | 4/5               |
| Age (mean $\pm$ SD)                          | 40.5 $\pm$ 13.6 | 32.57 $\pm$ 6.24 | 37.27 $\pm$ 12.02 | 45.89 $\pm$ 14.38 |
| Gender (female/male)                         | 3/1             | 5/2              | 4/7               | 4/5               |
| BMI (kg/m <sup>2</sup> ) (mean $\pm$ SD)     | 23.43 $\pm$ 1.5 | 23.41 $\pm$ 5.68 | 23.71 $\pm$ 3.35  | 24.16 $\pm$ 2.75  |
| Biological treatment (%)                     | -               |                  |                   |                   |
| None                                         |                 | 3 ( 42.9)        | 4 ( 36.4)         | 6 ( 66.7)         |
| Adalimumab                                   |                 | 2 ( 28.6)        | 4 ( 36.4)         | 1 ( 11.1)         |
| Infliximab                                   |                 | 1 ( 14.3)        | 2 ( 18.2)         | 1 ( 11.1)         |
| Ustekinumab                                  |                 | 1 ( 14.3)        | 0 ( 0.0)          | 1 ( 11.1)         |
| Vedolizumab                                  |                 | 0 ( 0.0)         | 1 ( 9.1)          | 0 ( 0.0)          |
| Age at diagnosis (%)                         | -               |                  |                   |                   |
| A1                                           |                 | 3 ( 42.9)        | 1 ( 10.0)         | 3 ( 33.3)         |
| A2                                           |                 | 4 ( 57.1)        | 7 ( 70.0)         | 2 ( 22.2)         |
| A3                                           |                 | 0 ( 0.0)         | 2 ( 20.0)         | 4 (44.4)          |
| Location (%)                                 | -               |                  |                   |                   |
| L1                                           |                 | 3 ( 42.9)        | 6 ( 60.0)         | 5 ( 55.6)         |
| L2                                           |                 | 2 ( 28.6)        | 2 ( 20.0)         | 4 ( 44.4)         |
| L3                                           |                 | 2 ( 28.6)        | 2 ( 20.0)         | 0 ( 0.0)          |
| Behavior (%)                                 | -               |                  |                   |                   |
| B1                                           |                 | 2 ( 28.6)        | 2 ( 20.0)         | 4 ( 44.4)         |
| B2                                           |                 | 2 ( 28.6)        | 5 ( 50.0)         | 1 ( 11.1)         |
| B3                                           |                 | 3 ( 42.9)        | 3 ( 30.0)         | 4 (44.4)          |
| C-reactive protein (mg/dL)<br>(median [IQR]) | -               | 1.42 [0.80-2.30] | 1.10 [0.40-13.40] | 0.77 [0.61-1.00]  |

Abbreviations: BMI, body mass index. Age at diagnosis: A1  $\leq$  16 years; A2 17–40 years; A3 > 40 years; Location: L1 = ileal; L2 = colonic; L3 = ileocolonic; Behavior: B1 = non-stenotic, non-fistulizing Crohn's disease; B2 = stenotic Crohn's disease; B3 = fistulizing Crohn's disease. a  $p < 0.05$  significant differences compared with control group. Statistical test applied using R software: `chisq.test()` for categorical variables (with continuity correction), `oneway.test()` for normal continuous variables and `kruskal.test()` was used for the non-normal continuous variables. No significant changes were observed among groups.

**Supplementary Table S2. Immunophenotypic profile of undifferentiated human adipose-derived stem cells (ASCs) isolated from non-smoker, smoker, and ex-smoker CD subjects.** The values reflect the mean  $\pm$ SD percentage surface positive staining of ASCs for a part of surface antigens including hematopoietic and stromal markers.

| <i>Antibody</i> | Non-smokers     | Smokers         | Ex-smokers      |
|-----------------|-----------------|-----------------|-----------------|
| <b>CD34</b>     | 0.15 $\pm$ 0.11 | 0.12 $\pm$ 0.10 | 0.11 $\pm$ 0.07 |
| <b>CD45</b>     | 0.18 $\pm$ 0.09 | 0.14 $\pm$ 0.07 | 0.10 $\pm$ 0.08 |
| <b>CD73</b>     | 97.1 $\pm$ 0.5  | 95.8 $\pm$ 0.9  | 96.6 $\pm$ 0.5  |
| <b>CD90</b>     | 98.2 $\pm$ 0.9  | 98.1 $\pm$ 0.4  | 97.5 $\pm$ 0.6  |
| <b>CD105</b>    | 98.9 $\pm$ 0.7  | 98.5 $\pm$ 0.7  | 99.1 $\pm$ 0.3  |

**Supplementary Table S3.** TaqMan probes used to perform qPCR

| Gene symbol                   | Description                       | TaqMan probes |
|-------------------------------|-----------------------------------|---------------|
| <b>IL6</b>                    | Interleukin 6                     | Hs00985639_m1 |
| <b>TNF<math>\alpha</math></b> | Tumor Necrosis Factor             | Hs00174128_m1 |
| <b>ILB1</b>                   | Interleukin 1 Beta                | Hs01555410_m1 |
| <b>IL10</b>                   | Interleukin 10                    | Hs00961622_m1 |
| <b>CD163</b>                  | CD163 Molecule                    | Hs00174705_m1 |
| <b>MRC1</b>                   | Mannose Receptor C-Type 1         | Hs00267207_m1 |
| <b>CASP1</b>                  | Caspase 1                         | Hs00354836_m1 |
| <b>TGF <math>\beta</math></b> | Transforming Growth Factor Beta 1 | Hs00234077_m1 |
| <b>18S</b>                    | 18S rRNA                          | Hs99999901_s1 |

**Supplementary Table S4.** Demographic characteristics and clinical data of patients used on the methylations study.

|                                                 | Non-smokers       | Smokers             | Ex-smokers          | p-value |
|-------------------------------------------------|-------------------|---------------------|---------------------|---------|
| <b>n</b>                                        | 5                 | 3                   | 2                   |         |
| <b>Disease status (%)</b>                       |                   |                     |                     | 0.058   |
| None (healthy)                                  | 3 ( 60.0)         | 0 ( 0.0)            | 0 ( 0.0)            |         |
| Active CD                                       | 2 ( 40.0)         | 2 ( 66.7)           | 0 ( 0.0)            |         |
| Inactive CD                                     | 0 ( 0.0)          | 1 ( 33.3)           | 2 (100.0)           |         |
| <b>Age (mean <math>\pm</math>SD)</b>            | 43.25 $\pm$ 16.96 | 29.33 $\pm$ 10.79   | 49 $\pm$ 2.93       | 0.30    |
| <b>Gender (%)</b>                               |                   |                     |                     | 0.574   |
| F                                               | 3 ( 60.0)         | 2 ( 66.7)           | 2 (100.0)           |         |
| M                                               | 2 ( 40.0)         | 1 ( 33.3)           | 0 ( 0.0)            |         |
| <b>BMI (kg/m<sup>2</sup>) (median[IQR])</b>     | 23 [21.90-24.90]  | 18.96 [18.48-19.43] | 29.15 [26.58-31.72] | 0.094   |
| <b>Biological treatment (%)</b>                 |                   |                     |                     | 0.274   |
| None                                            | 5 (100.0)         | 2 ( 66.7)           | 2 (100.0)           |         |
| Vedolizumab                                     | 0 ( 0.0)          | 1 ( 33.3)           | 0 ( 0.0)            |         |
| <b>Immunosupresor (%)</b>                       |                   |                     |                     | 0.127   |
| None                                            | 4 ( 80.0)         | 1 ( 33.3)           | 0 ( 0.0)            |         |
| Azathioprina                                    | 1 ( 20.0)         | 2 ( 66.7)           | 2 (100.0)           |         |
| <b>Age at diagnosis (%)</b>                     |                   |                     |                     | 0.526   |
| A1                                              | 0 ( 0.0)          | 1 (100.0)           | 1 ( 50.0)           |         |
| A2                                              | 2 (100.0)         | 0 ( 0.0)            | 1 ( 50.0)           |         |
| <b>Location (%)</b>                             |                   |                     |                     | 0.526   |
| L1                                              | 1 ( 50.0)         | 1 (100.0)           | 2 (100.0)           |         |
| L3                                              | 1 ( 50.0)         | 0 ( 0.0)            | 0 ( 0.0)            |         |
| <b>Behavior (%)</b>                             |                   |                     |                     | 0.118   |
| B2                                              | 2 (100.0)         | 0 ( 0.0)            | 0 ( 0.0)            |         |
| B3                                              | 0 ( 0.0)          | 1 (100.0)           | 2 (100.0)           |         |
| <b>C-reactive protein (mg/dL) (median[IQR])</b> | 1.70[1.05-2.35]   | 0.18[0.14-9.74]     | 0.40[0.40-0.40]     | 0.681   |

Abbreviations: CD, Crohn's disease; BMI, body mass index. Age at diagnosis: A1  $\leq$  16 years; A2 17–40 years; A3 > 40 years; Location: L1 = ileal; L2 = colonic; L3 = ileocolonic; Behavior: B1 = non-stenotic, non-fistulizing Crohn's disease; B2 = stenotic Crohn's disease; B3 = fistulizing Crohn's disease. Statistical test applied using R software: `chisq.test()` for categorical variables (with continuity correction), `oneway.test()` for normal continuous variables and `kruskal.test()` was used for the nonnormal continuous variables. No significant changes were observed among groups.

**Supplementary Table S5. Top 20 hypo- and hyper-methylated genes with more of 20% of change in the comparison smokers *versus* non-smokers.**

| TOP 20 HYPER-METHYLATED GENES |             |          |     |              |      |          |                                                                                                                                                                                                             |
|-------------------------------|-------------|----------|-----|--------------|------|----------|-------------------------------------------------------------------------------------------------------------------------------------------------------------------------------------------------------------|
| CpG                           | Fold Change | pval     | chr | Localization | DMSs | Gene     | Biological Function                                                                                                                                                                                         |
| cg03720617                    | 3,03        | 1,07E-06 | 16  | Body         | 1    | PHKB     | Phosphorylase b kinase catalyzes the phosphorylation of serine in certain substrates, including troponin I.                                                                                                 |
| cg13534698                    | 2,97        | 1,39E-05 | 16  | 5'UTR        | 1    | NDK1     | Required for centrosome duplication and formation and function of the mitotic spindle                                                                                                                       |
| cg26767001                    | 2,91        | 1,75E-06 | 12  | Body         | 1    | WNK1     | Serine/threonine kinase which plays an important role in the regulation of electrolyte homeostasis, cell signaling, survival, and proliferation.                                                            |
| cg06560360                    | 2,79        | 2,29E-05 | 14  | Body         | 1    | RAD51B   | Involved in the homologous recombination repair (HRR) pathway of double-stranded DNA breaks arising during DNA replication or induced by DNA-damaging agents.                                               |
| cg22225080                    | 2,70        | 3,87E-06 | 18  | Body         | 1    | SETBP1   | Enables histone H3K4 methyltransferase activity                                                                                                                                                             |
| cg04878315                    | 2,57        | 6,69E-05 | 7   | Body         | 1    | HOXA9    | Required for induction of E-selectin and VCAM-1, on the endothelial cells surface at sites of inflammation.                                                                                                 |
| cg16533146                    | 2,53        | 1,26E-06 | 12  | Body         | 1    | MRPS35   | Help in protein synthesis within the mitochondrion                                                                                                                                                          |
| cg04891600                    | 2,49        | 1,63E-07 | 11  | TSS1500      | 1    | CARD16   | Acts as a regulator of procaspase-1/CASP1 activation implicated in the regulation of the proteolytic maturation of pro-interleukin-1 beta (IL1B) and its release during inflammation.                       |
| cg05357859                    | 2,45        | 2,73E-07 | 6   | 5'UTR        | 1    | ANKRD6   | Recruits CKI-epsilon to the beta-catenin degradation complex that consists of AXN1 or AXN2 and GSK3-beta and allows efficient phosphorylation of beta-catenin, thereby inhibiting beta-catenin/Tcf signals. |
| cg26556684                    | 2,37        | 8,75E-06 | 2   | 5'UTR        | 1    | IL1R1    | Receptor for IL1A, IL1B and IL1RN                                                                                                                                                                           |
| cg25531591                    | 2,35        | 5,95E-06 | 11  | Body         | 1    | SERGEF   | Guanine nucleotide exchange factor (GEF), which may be involved in the secretion process                                                                                                                    |
| cg06042259                    | 2,33        | 3,42E-05 | 7   | Body         | 1    | JAZF1    | Cts as a transcriptional corepressor of orphan nuclear receptor NR2C2                                                                                                                                       |
| cg09711028                    | 2,28        | 6,62E-05 | 12  | Body         | 1    | ABCC9    | Subunit of ATP-sensitive potassium channels (KATP)                                                                                                                                                          |
| cg14332079                    | 2,27        | 1,06E-06 | 8   | TSS1500      | 1    | KCTD9    | Substrate-specific adapter of a BCR (BTB-CUL3-RBX1) E3 ubiquitin-protein ligase complex, which mediates the ubiquitination of target proteins, leading to their degradation by the proteasome               |
| cg14332079                    | 2,27        | 1,06E-06 | 8   | TSS1500      | 1    | CDCA2    | Regulator of chromosome structure during mitosis required for condensin-depleted chromosomes to retain their compact architecture through anaphase.                                                         |
| cg16311756                    | 2,26        | 7,51E-06 | 15  | 5'UTR        | 1    | CYFIP1   | Component of the CYFIP1-EIF4E-FMR1 complex which binds to the mRNA cap and mediates translational repression.                                                                                               |
| cg22127684                    | 2,25        | 7,06E-05 | 3   | Body         | 1    | GRM7     | G-protein coupled receptor activated by glutamate that regulates axon outgrowth through the MAPK-cAMP-PKA signaling pathway during neuronal development                                                     |
| cg25068347                    | 2,21        | 2,80E-06 | 11  | Body         | 1    | ETS1     | Directly controls the expression of cytokine and chemokine genes in a wide variety of different cellular contexts                                                                                           |
| cg04498511                    | 2,21        | 6,57E-05 | 1   | 5'UTR        | 1    | ZC3H1A   | RNA-binding protein that interacts with purine-rich sequences and is involved in nuclear mRNA export; probably mediated by association with the TREX complex.                                               |
| cg13534901                    | 2,17        | 1,61E-06 | 7   | Body         | 1    | AHR      | Plays important roles in development, immunity and cancer                                                                                                                                                   |
| TOP 20 HYPO-METHYLATED GENES  |             |          |     |              |      |          |                                                                                                                                                                                                             |
| CpG                           | Fold Change | pval     | chr | Localization | DMS  | Gene     | Biological Function                                                                                                                                                                                         |
| cg05420790                    | -2,84       | 4,93E-07 | 12  | 1stExon      | 3    | HOXC10   | Sequence-specific transcription factor which is part of a developmental regulatory system that provides cells with specific positional identities on the anterior-posterior axis.                           |
| cg21898463                    | -2,52       | 3,55E-06 | 12  | 1stExon      |      |          |                                                                                                                                                                                                             |
| cg02009895                    | -2,30       | 1,62E-06 | 12  | Body         |      |          |                                                                                                                                                                                                             |
| cg20340739                    | -2,35       | 4,90E-06 | 12  | TSS1500      | 3    | HOXC-AS3 | Is a long noncoding RNA (lncRNA) that plays a crucial role in various tumors                                                                                                                                |
| cg05420790                    | -2,84       | 4,93E-07 | 12  | TSS1500      |      |          |                                                                                                                                                                                                             |
| cg21898463                    | -2,52       | 3,55E-06 | 12  | TSS1500      |      |          |                                                                                                                                                                                                             |
| cg21493516                    | -2,55       | 3,01E-06 | 12  | 5'UTR        | 2    | HOXC4    | Sequence-specific transcription factor which is part of a developmental regulatory system that provides cells with specific positional identities on the anterior-posterior axis.                           |
| cg05408649                    | -2,80       | 1,72E-06 | 12  | 5'UTR        |      |          |                                                                                                                                                                                                             |
| cg20817902                    | -2,28       | 1,90E-08 | 4   | Body         | 2    | PRDM8    | Probable histone methyltransferase, preferentially acting on 'Lys-9' of histone H3 (By similarity).                                                                                                         |
| cg23874561                    | -2,61       | 3,42E-06 | 4   | Body         |      |          |                                                                                                                                                                                                             |
| cg17429374                    | -2,60       | 4,90E-05 | 11  | Body         | 1    | MACROD1  | Removes ADP-ribose from aspartate and glutamate residues in proteins bearing a single ADP-ribose moiety                                                                                                     |
| cg06636831                    | -2,50       | 1,05E-05 | 3   | Body         |      | CLEC3B   | Tetranectin binds to plasminogen and to isolated kringle 4.                                                                                                                                                 |
| cg05412137                    | -2,02       | 2,26E-05 | 12  | TSS1500      | 3    | MIR196A2 | Involved in post-transcriptional regulation of gene expression in multicellular organisms by affecting both the stability and translation of mRNAs                                                          |
| cg08053137                    | -2,49       | 9,39E-07 | 12  | TSS200       |      |          |                                                                                                                                                                                                             |
| cg10662314                    | -2,21       | 6,36E-06 | 12  | TSS1500      |      |          |                                                                                                                                                                                                             |
| cg06967452                    | -2,16       | 9,19E-05 | 8   | Body         | 1    | MIR1268A | Involved in post-transcriptional regulation of gene expression in multicellular organisms by affecting both the stability and translation of mRNAs                                                          |
| cg16663155                    | -2,45       | 1,78E-05 | 11  | Body         | 1    | INCENP   | Component of the chromosomal passenger complex (CPC), a complex that acts as a key regulator of mitosis.                                                                                                    |
| cg19274890                    | -2,16       | 5,19E-05 | 7   | TSS200       | 1    | DPP6     | Promotes cell surface expression of the potassium channel KCND2                                                                                                                                             |
| cg05956380                    | -2,11       | 7,35E-05 | 8   | 5'UTR        | 1    | SLC20A2  | Role in extracellular matrix, cartilage and vascular calcification.                                                                                                                                         |
| cg25444339                    | -2,09       | 2,52E-06 | 7   | Body         | 1    | HIP1     | Plays a role in clathrin-mediated endocytosis and trafficking                                                                                                                                               |
| cg18124949                    | -2,08       | 8,61E-05 | 3   | Body         | 1    | SCHIP1   | Animal organ development; face morphogenesis; cell junction and fibroblast migration                                                                                                                        |
| cg12776605                    | -2,08       | 1,81E-05 | 3   | TSS1500      | 1    | ARPP21   | Isoform 2 may act as a competitive inhibitor of calmodulin-dependent enzymes such as calcineurin in neurons.                                                                                                |
| cg04951371                    | -1,97       | 2,49E-05 | 2   | Body         | 1    | TSSC1    | Acts as a component of endosomal retrieval machinery that is involved in protein transport from early endosomes to either recycling endosomes or the trans-Golgi network                                    |
| cg15061302                    | -1,94       | 2,51E-05 | 3   | TSS1500      | 2    | TRRAP    | ADP-ribosyltransferase that mediates mono-ADP-ribosylation of glutamate, aspartate and cysteine residues on target proteins                                                                                 |
| cg09320924                    | -1,92       | 3,70E-06 | 5   | Body         | 1    | SSBP2    | Enables single-stranded DNA binding                                                                                                                                                                         |
| cg12898442                    | -1,91       | 9,06E-05 | 11  | 3'UTR        | 1    | NRGN     | Acts as a 'third messenger' substrate of protein kinase C-mediated molecular cascades during synaptic development and remodeling.                                                                           |
| cg02936049                    | -1,89       | 7,46E-05 | 3   | 5'UTR        | 1    | ZBTB38   | Transcriptional regulator with bimodal DNA-binding specificity.                                                                                                                                             |
| cg21147635                    | -1,89       | 1,18E-05 | 22  | 5'UTR        | 1    | MICAL3   | Promotes depolymerization of F-actin by mediating oxidation of specific methionine residues on actin to form methionine-sulfoxide, resulting in actin filament disassembly and preventing repolymerization. |
