# Supplementary material for: Smoking Suppresses the Therapeutic Potential of Adipose Stem Cells in Crohn’s Disease Patients through Epigenetic Changes
Source: MDPI journal article supplement (doi:10.3390/cells12071021), 2023-03-27
Supplement: s1 [file s1]

Figure S1.

A.

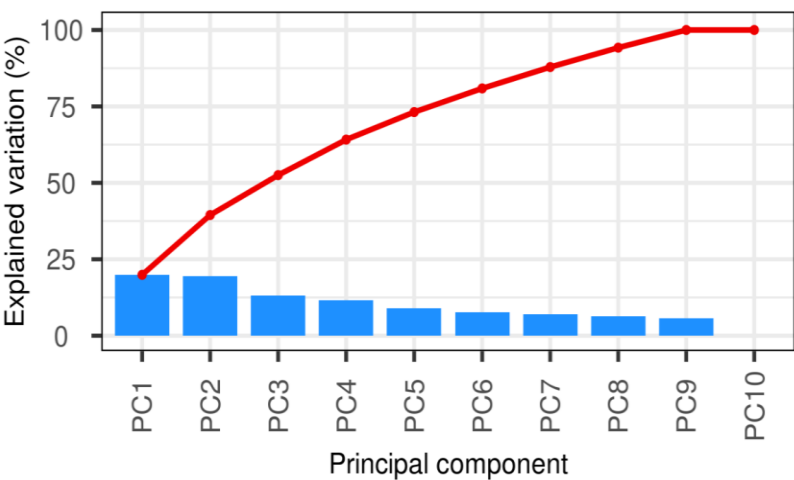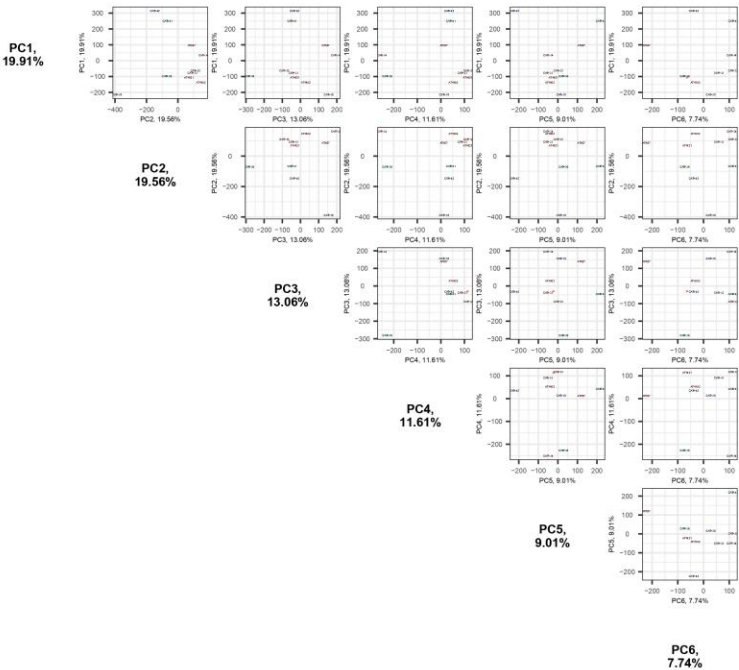

Figure S1: Scree plot that shows the cumulative variance explained by each principal component (PC).

Figure S2.

A.

Extracellular matrix organization

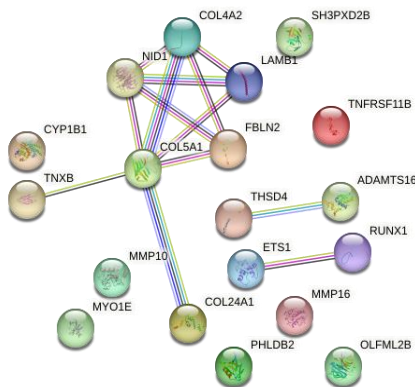

|                                         |                                  |
|-----------------------------------------|----------------------------------|
| Number of nodes: 19                     | Number of edges: 13              |
| Average node degree: 1.37               | Expected number of edges: 1      |
| Avg.local clustering coefficient: 0.526 | PPI enrichment p-value: 3.04e-10 |

Cell junction assembly

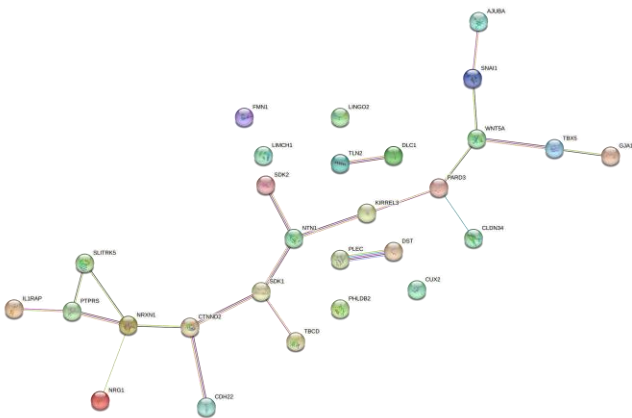

|                                         |                                  |
|-----------------------------------------|----------------------------------|
| Number of nodes: 28                     | Number of edges: 21              |
| Average node degree: 1.5                | Expected number of edges: 4      |
| Avg.local clustering coefficient: 0.482 | PPI enrichment p-value: 3.19e-09 |

Cell-substrate adhesion

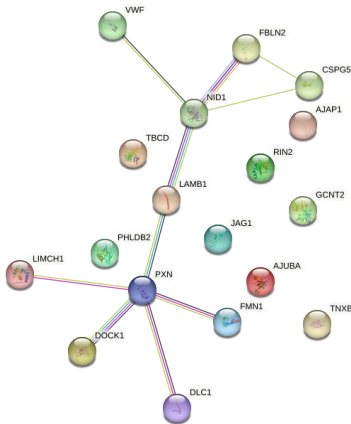

|                                         |                                  |
|-----------------------------------------|----------------------------------|
| Number of nodes: 18                     | Number of edges: 10              |
| Average node degree: 1.11               | Expected number of edges: 2      |
| Avg.local clustering coefficient: 0.398 | PPI enrichment p-value: 1.05e-05 |

Figure S2: Functional protein association networks using STRING plots of the gens implicated in the extracellular matrix organization, the cell junction assembly and the cell-substrate adhesion processes
