# Supplementary material for: Smoking Suppresses the Therapeutic Potential of Adipose Stem Cells in Crohn’s Disease Patients through Epigenetic Changes
Source: Cells. 2023 Mar 27;12(7):1021. doi: 10.3390/cells12071021 (PMC10093550; doi:10.3390/cells12071021)
Supplement: Supplementary file 1 [file cells-12-01021-s001.zip]

Archive with 6 entries (6 files):
- Supplementary Excel S1.xlsx
- Supplementary Excel S2.xlsx
- Supplementary Excel S3.xlsx
- Supplementary Excel S4.xlsx
- Supplementary Figures.pdf
- Supplementary Tables.pdf
