# Supplementary material for: Smoking Suppresses the Therapeutic Potential of Adipose Stem Cells in Crohn’s Disease Patients through Epigenetic Changes
Source: Cells. 2023 Mar 27;12(7):1021. doi: 10.3390/cells12071021 (PMC10093550; doi:10.3390/cells12071021)
Supplement: Supplementary file 1 [file cells-12-01021-s001.zip › Supplementary Excel S1.xlsx]

## Sheet: Biologic Process
ID	Description	GeneRatio	BgRatio	pvalue	p.adjust	qvalue	geneID	Count
GO:0048251	elastic fiber assembly	9/539	18/20870	1.89087e-10	8.10236e-07	6.95241e-07	ENSG00000187720/ENSG00000168477/ENSG00000229341/ENSG00000229353/ENSG00000236221/ENSG00000231608/ENSG00000206258/ENSG00000236236/ENSG00000233323	9
GO:0030900	forebrain development	33/539	412/20870	1.0333e-08	2.21385e-05	1.89964e-05	ENSG00000170370/ENSG00000016082/ENSG00000134954/ENSG00000164741/ENSG00000288673/ENSG00000089094/ENSG00000010810/ENSG00000136848/ENSG00000072864/ENSG00000275911/ENSG00000187240/ENSG00000138772/ENSG00000115507/ENSG00000106571/ENSG00000111783/ENSG00000078674/ENSG00000142319/ENSG00000276996/ENSG00000091136/ENSG00000135111/ENSG00000198846/ENSG00000145147/ENSG00000066468/ENSG00000105426/ENSG00000149187…	33
GO:0085029	extracellular matrix assembly	11/539	53/20870	8.79595e-08	0.000117282	0.000100636	ENSG00000187720/ENSG00000091136/ENSG00000168477/ENSG00000229341/ENSG00000229353/ENSG00000236221/ENSG00000231608/ENSG00000206258/ENSG00000236236/ENSG00000233323/ENSG00000144824	11
GO:0043506	regulation of JUN kinase activity	13/539	79/20870	1.09481e-07	0.000117282	0.000100636	ENSG00000127191/ENSG00000136848/ENSG00000116106/ENSG00000168477/ENSG00000229341/ENSG00000229353/ENSG00000236221/ENSG00000231608/ENSG00000206258/ENSG00000236236/ENSG00000233323/ENSG00000114251/ENSG00000141655	13
GO:0007389	pattern specification process	32/539	458/20870	3.98048e-07	0.000341127	0.000292712	ENSG00000170370/ENSG00000198353/ENSG00000016082/ENSG00000089094/ENSG00000075223/ENSG00000204227/ENSG00000228520/ENSG00000235107/ENSG00000226788/ENSG00000206287/ENSG00000231115/ENSG00000187240/ENSG00000115507/ENSG00000106571/ENSG00000111783/ENSG00000106511/ENSG00000135111/ENSG00000123977/ENSG00000124216/ENSG00000066468/ENSG00000143995/ENSG00000173917/ENSG00000089225/ENSG00000078399/ENSG00000182742…	32
GO:0003002	regionalization	27/539	352/20870	5.40335e-07	0.000385889	0.000331121	ENSG00000170370/ENSG00000198353/ENSG00000016082/ENSG00000089094/ENSG00000075223/ENSG00000204227/ENSG00000228520/ENSG00000235107/ENSG00000226788/ENSG00000206287/ENSG00000231115/ENSG00000187240/ENSG00000115507/ENSG00000106571/ENSG00000111783/ENSG00000106511/ENSG00000135111/ENSG00000124216/ENSG00000066468/ENSG00000173917/ENSG00000078399/ENSG00000182742/ENSG00000114251/ENSG00000118257/ENSG00000130700…	27
GO:0009952	anterior/posterior pattern specification	20/539	214/20870	7.8853e-07	0.000482693	0.000414186	ENSG00000170370/ENSG00000198353/ENSG00000089094/ENSG00000075223/ENSG00000204227/ENSG00000228520/ENSG00000235107/ENSG00000226788/ENSG00000206287/ENSG00000231115/ENSG00000115507/ENSG00000106571/ENSG00000106511/ENSG00000135111/ENSG00000173917/ENSG00000078399/ENSG00000182742/ENSG00000114251/ENSG00000253729/ENSG00000120075	20
GO:0042060	wound healing	32/539	480/20870	1.10909e-06	0.000594055	0.000509743	ENSG00000118898/ENSG00000134954/ENSG00000091583/ENSG00000152661/ENSG00000126218/ENSG00000073060/ENSG00000130635/ENSG00000106571/ENSG00000110799/ENSG00000100345/ENSG00000100099/ENSG00000151914/ENSG00000129474/ENSG00000112062/ENSG00000173918/ENSG00000151694/ENSG00000196581/ENSG00000066468/ENSG00000197943/ENSG00000149131/ENSG00000144824/ENSG00000114251/ENSG00000179348/ENSG00000213719/ENSG00000226651…	32
GO:0030198	extracellular matrix organization	26/539	350/20870	1.59712e-06	0.000678456	0.000582164	ENSG00000134954/ENSG00000174705/ENSG00000187720/ENSG00000138061/ENSG00000162745/ENSG00000130635/ENSG00000171502/ENSG00000145536/ENSG00000091136/ENSG00000116962/ENSG00000168477/ENSG00000229341/ENSG00000229353/ENSG00000236221/ENSG00000231608/ENSG00000206258/ENSG00000236236/ENSG00000233323/ENSG00000163520/ENSG00000156103/ENSG00000159216/ENSG00000166670/ENSG00000134871/ENSG00000144824/ENSG00000164761…	26
GO:0043062	extracellular structure organization	26/539	351/20870	1.68401e-06	0.000678456	0.000582164	ENSG00000134954/ENSG00000174705/ENSG00000187720/ENSG00000138061/ENSG00000162745/ENSG00000130635/ENSG00000171502/ENSG00000145536/ENSG00000091136/ENSG00000116962/ENSG00000168477/ENSG00000229341/ENSG00000229353/ENSG00000236221/ENSG00000231608/ENSG00000206258/ENSG00000236236/ENSG00000233323/ENSG00000163520/ENSG00000156103/ENSG00000159216/ENSG00000166670/ENSG00000134871/ENSG00000144824/ENSG00000164761…	26
GO:0035518	histone H2A monoubiquitination	7/539	24/20870	1.74166e-06	0.000678456	0.000582164	ENSG00000089094/ENSG00000204227/ENSG00000228520/ENSG00000235107/ENSG00000226788/ENSG00000206287/ENSG00000231115	7
GO:0045229	external encapsulating structure organization	26/539	354/20870	1.97141e-06	0.000703957	0.000604046	ENSG00000134954/ENSG00000174705/ENSG00000187720/ENSG00000138061/ENSG00000162745/ENSG00000130635/ENSG00000171502/ENSG00000145536/ENSG00000091136/ENSG00000116962/ENSG00000168477/ENSG00000229341/ENSG00000229353/ENSG00000236221/ENSG00000231608/ENSG00000206258/ENSG00000236236/ENSG00000233323/ENSG00000163520/ENSG00000156103/ENSG00000159216/ENSG00000166670/ENSG00000134871/ENSG00000144824/ENSG00000164761…	26
GO:0031589	cell-substrate adhesion	28/539	402/20870	2.25658e-06	0.000743803	0.000638237	ENSG00000164741/ENSG00000288673/ENSG00000089159/ENSG00000114646/ENSG00000150760/ENSG00000141556/ENSG00000278759/ENSG00000110799/ENSG00000111846/ENSG00000285222/ENSG00000129474/ENSG00000091136/ENSG00000132669/ENSG00000196581/ENSG00000248905/ENSG00000064042/ENSG00000116962/ENSG00000168477/ENSG00000229341/ENSG00000229353/ENSG00000236221/ENSG00000231608/ENSG00000206258/ENSG00000236236/ENSG00000233323…	28
GO:0048593	camera-type eye morphogenesis	15/539	139/20870	3.21819e-06	0.000906545	0.000777882	ENSG00000069188/ENSG00000089094/ENSG00000204227/ENSG00000228520/ENSG00000235107/ENSG00000226788/ENSG00000206287/ENSG00000231115/ENSG00000106571/ENSG00000143995/ENSG00000143816/ENSG00000173482/ENSG00000146555/ENSG00000101384/ENSG00000114251	15
GO:0034329	cell junction assembly	30/539	457/20870	3.28064e-06	0.000906545	0.000777882	ENSG00000149654/ENSG00000179915/ENSG00000164741/ENSG00000288673/ENSG00000069188/ENSG00000152661/ENSG00000171914/ENSG00000165300/ENSG00000111249/ENSG00000141556/ENSG00000278759/ENSG00000148498/ENSG00000174482/ENSG00000151914/ENSG00000129474/ENSG00000234469/ENSG00000196083/ENSG00000248905/ENSG00000124216/ENSG00000169862/ENSG00000064042/ENSG00000089225/ENSG00000105426/ENSG00000065320/ENSG00000146555…	30
GO:0045669	positive regulation of osteoblast differentiation	11/539	75/20870	3.385e-06	0.000906545	0.000777882	ENSG00000124813/ENSG00000169884/ENSG00000106571/ENSG00000101384/ENSG00000213719/ENSG00000226651/ENSG00000230685/ENSG00000223639/ENSG00000226417/ENSG00000226248/ENSG00000206394	11
GO:1900029	positive regulation of ruffle assembly	6/539	20/20870	8.21739e-06	0.00207127	0.0017773	ENSG00000273749/ENSG00000280618/ENSG00000288461/ENSG00000225190/ENSG00000276358/ENSG00000277111	6
GO:0048592	eye morphogenesis	16/539	170/20870	9.05574e-06	0.00215577	0.00184981	ENSG00000069188/ENSG00000089094/ENSG00000204227/ENSG00000228520/ENSG00000235107/ENSG00000226788/ENSG00000206287/ENSG00000231115/ENSG00000130635/ENSG00000106571/ENSG00000143995/ENSG00000143816/ENSG00000173482/ENSG00000146555/ENSG00000101384/ENSG00000114251	16
GO:0060411	cardiac septum morphogenesis	10/539	69/20870	1.05179e-05	0.00237206	0.0020354	ENSG00000016082/ENSG00000075223/ENSG00000135111/ENSG00000145147/ENSG00000066468/ENSG00000089225/ENSG00000101384/ENSG00000114251/ENSG00000118257/ENSG00000124766	10
GO:0030879	mammary gland development	15/539	154/20870	1.13651e-05	0.00243498	0.00208939	ENSG00000185950/ENSG00000170430/ENSG00000106571/ENSG00000091831/ENSG00000142319/ENSG00000276996/ENSG00000196498/ENSG00000135111/ENSG00000066468/ENSG00000065320/ENSG00000078399/ENSG00000145730/ENSG00000114251/ENSG00000141655/ENSG00000157168	15
GO:0006641	triglyceride metabolic process	13/539	119/20870	1.26551e-05	0.00258224	0.00221575	ENSG00000091583/ENSG00000123684/ENSG00000151726/ENSG00000073060/ENSG00000110090/ENSG00000168477/ENSG00000229341/ENSG00000229353/ENSG00000236221/ENSG00000231608/ENSG00000206258/ENSG00000236236/ENSG00000233323	13
GO:0006821	chloride transport	13/539	121/20870	1.51727e-05	0.00288769	0.00247785	ENSG00000134343/ENSG00000124067/ENSG00000182256/ENSG00000089356/ENSG00000285526/ENSG00000047617/ENSG00000213719/ENSG00000226651/ENSG00000230685/ENSG00000223639/ENSG00000226417/ENSG00000226248/ENSG00000206394	13
GO:0043254	regulation of protein-containing complex assembly	29/539	470/20870	1.54999e-05	0.00288769	0.00247785	ENSG00000016082/ENSG00000127191/ENSG00000273749/ENSG00000280618/ENSG00000288461/ENSG00000134775/ENSG00000136848/ENSG00000136717/ENSG00000154451/ENSG00000169884/ENSG00000213398/ENSG00000141556/ENSG00000278759/ENSG00000197321/ENSG00000154059/ENSG00000091831/ENSG00000129474/ENSG00000070182/ENSG00000171853/ENSG00000274891/ENSG00000158092/ENSG00000248905/ENSG00000145147/ENSG00000115306/ENSG00000197943…	29
GO:0090596	sensory organ morphogenesis	21/539	284/20870	1.70936e-05	0.00305191	0.00261876	ENSG00000069188/ENSG00000089094/ENSG00000204227/ENSG00000228520/ENSG00000235107/ENSG00000226788/ENSG00000206287/ENSG00000231115/ENSG00000130635/ENSG00000115507/ENSG00000106571/ENSG00000066468/ENSG00000143995/ENSG00000143816/ENSG00000065320/ENSG00000173482/ENSG00000006377/ENSG00000146555/ENSG00000101384/ENSG00000114251/ENSG00000179348	21
GO:0033522	histone H2A ubiquitination	7/539	34/20870	2.16384e-05	0.00358392	0.00307526	ENSG00000089094/ENSG00000204227/ENSG00000228520/ENSG00000235107/ENSG00000226788/ENSG00000206287/ENSG00000231115	7
GO:0051058	negative regulation of small GTPase mediated signal transduction	9/539	60/20870	2.18935e-05	0.00358392	0.00307526	ENSG00000164741/ENSG00000288673/ENSG00000136848/ENSG00000143322/ENSG00000145147/ENSG00000128849/ENSG00000035862/ENSG00000185989/ENSG00000280477	9
GO:0048705	skeletal system morphogenesis	18/539	224/20870	2.25825e-05	0.00358392	0.00307526	ENSG00000198353/ENSG00000176842/ENSG00000124813/ENSG00000169884/ENSG00000163659/ENSG00000106571/ENSG00000112062/ENSG00000248905/ENSG00000066468/ENSG00000167522/ENSG00000173917/ENSG00000186153/ENSG00000078399/ENSG00000156103/ENSG00000053254/ENSG00000182742/ENSG00000155846/ENSG00000120075	18
GO:0010631	epithelial cell migration	25/539	383/20870	2.3618e-05	0.0036144	0.00310142	ENSG00000114861/ENSG00000134954/ENSG00000089159/ENSG00000091583/ENSG00000171444/ENSG00000117020/ENSG00000275199/ENSG00000136848/ENSG00000150760/ENSG00000073060/ENSG00000011426/ENSG00000138061/ENSG00000138772/ENSG00000100345/ENSG00000048052/ENSG00000106511/ENSG00000151694/ENSG00000132669/ENSG00000145147/ENSG00000183287/ENSG00000173482/ENSG00000197943/ENSG00000114251/ENSG00000118257/ENSG00000179348	25
GO:0032743	positive regulation of interleukin-2 production	7/539	35/20870	2.645e-05	0.00384024	0.0032952	ENSG00000127191/ENSG00000081237/ENSG00000262418/ENSG00000134258/ENSG00000115306/ENSG00000159216/ENSG00000197943	7
GO:0090132	epithelium migration	25/539	386/20870	2.68862e-05	0.00384024	0.0032952	ENSG00000114861/ENSG00000134954/ENSG00000089159/ENSG00000091583/ENSG00000171444/ENSG00000117020/ENSG00000275199/ENSG00000136848/ENSG00000150760/ENSG00000073060/ENSG00000011426/ENSG00000138061/ENSG00000138772/ENSG00000100345/ENSG00000048052/ENSG00000106511/ENSG00000151694/ENSG00000132669/ENSG00000145147/ENSG00000183287/ENSG00000173482/ENSG00000197943/ENSG00000114251/ENSG00000118257/ENSG00000179348	25
GO:0030199	collagen fibril organization	10/539	78/20870	3.16267e-05	0.00429958	0.00368936	ENSG00000138061/ENSG00000130635/ENSG00000168477/ENSG00000229341/ENSG00000229353/ENSG00000236221/ENSG00000231608/ENSG00000206258/ENSG00000236236/ENSG00000233323	10
GO:0010390	histone monoubiquitination	7/539	36/20870	3.21089e-05	0.00429958	0.00368936	ENSG00000089094/ENSG00000204227/ENSG00000228520/ENSG00000235107/ENSG00000226788/ENSG00000206287/ENSG00000231115	7
GO:0090130	tissue migration	25/539	391/20870	3.32502e-05	0.00431749	0.00370472	ENSG00000114861/ENSG00000134954/ENSG00000089159/ENSG00000091583/ENSG00000171444/ENSG00000117020/ENSG00000275199/ENSG00000136848/ENSG00000150760/ENSG00000073060/ENSG00000011426/ENSG00000138061/ENSG00000138772/ENSG00000100345/ENSG00000048052/ENSG00000106511/ENSG00000151694/ENSG00000132669/ENSG00000145147/ENSG00000183287/ENSG00000173482/ENSG00000197943/ENSG00000114251/ENSG00000118257/ENSG00000179348	25
GO:0007409	axonogenesis	27/539	445/20870	4.0529e-05	0.00510785	0.00438291	ENSG00000016082/ENSG00000179915/ENSG00000111962/ENSG00000166963/ENSG00000273749/ENSG00000280618/ENSG00000288461/ENSG00000010810/ENSG00000075223/ENSG00000165300/ENSG00000158321/ENSG00000129116/ENSG00000106571/ENSG00000148498/ENSG00000116106/ENSG00000167178/ENSG00000080224/ENSG00000145147/ENSG00000066468/ENSG00000105426/ENSG00000018189/ENSG00000065320/ENSG00000173482/ENSG00000136040/ENSG00000147862…	27
GO:0043542	endothelial cell migration	21/539	303/20870	4.44432e-05	0.00544112	0.00466887	ENSG00000114861/ENSG00000134954/ENSG00000089159/ENSG00000091583/ENSG00000117020/ENSG00000275199/ENSG00000136848/ENSG00000073060/ENSG00000138061/ENSG00000138772/ENSG00000100345/ENSG00000048052/ENSG00000106511/ENSG00000151694/ENSG00000132669/ENSG00000145147/ENSG00000183287/ENSG00000173482/ENSG00000114251/ENSG00000118257/ENSG00000179348	21
GO:0031346	positive regulation of cell projection organization	24/539	376/20870	4.88719e-05	0.00581711	0.00499151	ENSG00000273749/ENSG00000280618/ENSG00000288461/ENSG00000010810/ENSG00000136848/ENSG00000184640/ENSG00000282302/ENSG00000111249/ENSG00000011426/ENSG00000158321/ENSG00000143322/ENSG00000158092/ENSG00000116106/ENSG00000167178/ENSG00000198846/ENSG00000145147/ENSG00000147852/ENSG00000018189/ENSG00000065320/ENSG00000136040/ENSG00000225190/ENSG00000276358/ENSG00000277111/ENSG00000114251	24
GO:0015698	inorganic anion transport	16/539	196/20870	5.27237e-05	0.00599317	0.00514258	ENSG00000134343/ENSG00000124067/ENSG00000182256/ENSG00000089356/ENSG00000285526/ENSG00000047617/ENSG00000080493/ENSG00000069431/ENSG00000168575/ENSG00000213719/ENSG00000226651/ENSG00000230685/ENSG00000223639/ENSG00000226417/ENSG00000226248/ENSG00000206394	16
GO:0007411	axon guidance	18/539	239/20870	5.31483e-05	0.00599317	0.00514258	ENSG00000016082/ENSG00000179915/ENSG00000273749/ENSG00000280618/ENSG00000288461/ENSG00000010810/ENSG00000075223/ENSG00000129116/ENSG00000106571/ENSG00000116106/ENSG00000080224/ENSG00000145147/ENSG00000065320/ENSG00000173482/ENSG00000136040/ENSG00000147862/ENSG00000114251/ENSG00000118257	18
GO:0032963	collagen metabolic process	12/539	118/20870	5.54493e-05	0.00601089	0.00515778	ENSG00000130635/ENSG00000168477/ENSG00000229341/ENSG00000229353/ENSG00000236221/ENSG00000231608/ENSG00000206258/ENSG00000236236/ENSG00000233323/ENSG00000156103/ENSG00000159216/ENSG00000166670	12
GO:0097485	neuron projection guidance	18/539	240/20870	5.6111e-05	0.00601089	0.00515778	ENSG00000016082/ENSG00000179915/ENSG00000273749/ENSG00000280618/ENSG00000288461/ENSG00000010810/ENSG00000075223/ENSG00000129116/ENSG00000106571/ENSG00000116106/ENSG00000080224/ENSG00000145147/ENSG00000065320/ENSG00000173482/ENSG00000136040/ENSG00000147862/ENSG00000114251/ENSG00000118257	18
GO:0010595	positive regulation of endothelial cell migration	13/539	140/20870	7.11204e-05	0.00743295	0.00637801	ENSG00000114861/ENSG00000134954/ENSG00000117020/ENSG00000275199/ENSG00000073060/ENSG00000138772/ENSG00000048052/ENSG00000151694/ENSG00000132669/ENSG00000183287/ENSG00000114251/ENSG00000118257/ENSG00000179348	13
GO:0007160	cell-matrix adhesion	19/539	268/20870	7.5133e-05	0.00750795	0.00644237	ENSG00000164741/ENSG00000288673/ENSG00000089159/ENSG00000129474/ENSG00000132669/ENSG00000196581/ENSG00000248905/ENSG00000064042/ENSG00000116962/ENSG00000168477/ENSG00000229341/ENSG00000229353/ENSG00000236221/ENSG00000231608/ENSG00000206258/ENSG00000236236/ENSG00000233323/ENSG00000101384/ENSG00000144824	19
GO:0045165	cell fate commitment	20/539	291/20870	7.53424e-05	0.00750795	0.00644237	ENSG00000016082/ENSG00000124813/ENSG00000169884/ENSG00000221818/ENSG00000186487/ENSG00000064655/ENSG00000106571/ENSG00000135111/ENSG00000198846/ENSG00000066468/ENSG00000089225/ENSG00000143816/ENSG00000101384/ENSG00000114251/ENSG00000179348/ENSG00000198795/ENSG00000130700/ENSG00000181449/ENSG00000253729/ENSG00000157168	20
GO:0010632	regulation of epithelial cell migration	21/539	315/20870	7.75995e-05	0.00755713	0.00648457	ENSG00000114861/ENSG00000134954/ENSG00000091583/ENSG00000171444/ENSG00000117020/ENSG00000275199/ENSG00000136848/ENSG00000150760/ENSG00000073060/ENSG00000138772/ENSG00000048052/ENSG00000106511/ENSG00000151694/ENSG00000132669/ENSG00000145147/ENSG00000183287/ENSG00000173482/ENSG00000197943/ENSG00000114251/ENSG00000118257/ENSG00000179348	21
GO:0003206	cardiac chamber morphogenesis	12/539	123/20870	8.32111e-05	0.00780525	0.00669747	ENSG00000016082/ENSG00000075223/ENSG00000135111/ENSG00000145147/ENSG00000066468/ENSG00000089225/ENSG00000101384/ENSG00000114251/ENSG00000118257/ENSG00000124766/ENSG00000198626/ENSG00000157168	12
GO:0048736	appendage development	15/539	183/20870	8.56119e-05	0.00780525	0.00669747	ENSG00000075223/ENSG00000124813/ENSG00000187240/ENSG00000106571/ENSG00000106511/ENSG00000217236/ENSG00000135111/ENSG00000248905/ENSG00000066468/ENSG00000089225/ENSG00000078399/ENSG00000006377/ENSG00000145730/ENSG00000114251/ENSG00000124766	15
GO:0060173	limb development	15/539	183/20870	8.56119e-05	0.00780525	0.00669747	ENSG00000075223/ENSG00000124813/ENSG00000187240/ENSG00000106571/ENSG00000106511/ENSG00000217236/ENSG00000135111/ENSG00000248905/ENSG00000066468/ENSG00000089225/ENSG00000078399/ENSG00000006377/ENSG00000145730/ENSG00000114251/ENSG00000124766	15
GO:0010634	positive regulation of epithelial cell migration	15/539	184/20870	9.10429e-05	0.00812748	0.00697397	ENSG00000114861/ENSG00000134954/ENSG00000117020/ENSG00000275199/ENSG00000150760/ENSG00000073060/ENSG00000138772/ENSG00000048052/ENSG00000151694/ENSG00000132669/ENSG00000183287/ENSG00000197943/ENSG00000114251/ENSG00000118257/ENSG00000179348	15
GO:0016055	Wnt signaling pathway	27/539	468/20870	9.48225e-05	0.00829213	0.00711525	ENSG00000135299/ENSG00000060237/ENSG00000016082/ENSG00000171444/ENSG00000198873/ENSG00000136848/ENSG00000163637/ENSG00000169884/ENSG00000154310/ENSG00000106571/ENSG00000112062/ENSG00000165566/ENSG00000179399/ENSG00000169862/ENSG00000066468/ENSG00000173218/ENSG00000186153/ENSG00000143816/ENSG00000189319/ENSG00000167693/ENSG00000281300/ENSG00000280563/ENSG00000197943/ENSG00000114251/ENSG00000122870…	27
GO:0003007	heart morphogenesis	18/539	251/20870	9.97391e-05	0.0083982	0.00720627	ENSG00000016082/ENSG00000164741/ENSG00000288673/ENSG00000075223/ENSG00000130635/ENSG00000135111/ENSG00000124216/ENSG00000145147/ENSG00000066468/ENSG00000089225/ENSG00000101384/ENSG00000114251/ENSG00000118257/ENSG00000124766/ENSG00000130700/ENSG00000198626/ENSG00000157168/ENSG00000133816	18
GO:0198738	cell-cell signaling by wnt	27/539	470/20870	0.000101755	0.0083982	0.00720627	ENSG00000135299/ENSG00000060237/ENSG00000016082/ENSG00000171444/ENSG00000198873/ENSG00000136848/ENSG00000163637/ENSG00000169884/ENSG00000154310/ENSG00000106571/ENSG00000112062/ENSG00000165566/ENSG00000179399/ENSG00000169862/ENSG00000066468/ENSG00000173218/ENSG00000186153/ENSG00000143816/ENSG00000189319/ENSG00000167693/ENSG00000281300/ENSG00000280563/ENSG00000197943/ENSG00000114251/ENSG00000122870…	27
GO:0003279	cardiac septum development	11/539	107/20870	0.000101915	0.0083982	0.00720627	ENSG00000016082/ENSG00000075223/ENSG00000135111/ENSG00000103148/ENSG00000145147/ENSG00000066468/ENSG00000089225/ENSG00000101384/ENSG00000114251/ENSG00000118257/ENSG00000124766	11
GO:0048706	embryonic skeletal system development	12/539	126/20870	0.000105045	0.0084928	0.00728744	ENSG00000198353/ENSG00000176842/ENSG00000124813/ENSG00000106571/ENSG00000066468/ENSG00000173917/ENSG00000143816/ENSG00000078399/ENSG00000156103/ENSG00000182742/ENSG00000114251/ENSG00000120075	12
GO:0010594	regulation of endothelial cell migration	18/539	253/20870	0.000110286	0.00852038	0.00731111	ENSG00000114861/ENSG00000134954/ENSG00000091583/ENSG00000117020/ENSG00000275199/ENSG00000136848/ENSG00000073060/ENSG00000138772/ENSG00000048052/ENSG00000106511/ENSG00000151694/ENSG00000132669/ENSG00000145147/ENSG00000183287/ENSG00000173482/ENSG00000114251/ENSG00000118257/ENSG00000179348	18
GO:0007015	actin filament organization	27/539	473/20870	0.000113006	0.00852038	0.00731111	ENSG00000127946/ENSG00000164741/ENSG00000288673/ENSG00000089159/ENSG00000273749/ENSG00000280618/ENSG00000288461/ENSG00000134775/ENSG00000136717/ENSG00000243156/ENSG00000007237/ENSG00000197321/ENSG00000070182/ENSG00000158092/ENSG00000131504/ENSG00000248905/ENSG00000145147/ENSG00000128849/ENSG00000064042/ENSG00000018189/ENSG00000115306/ENSG00000132854/ENSG00000144824/ENSG00000155846/ENSG00000157483…	27
GO:0048880	sensory system development	25/539	422/20870	0.000113143	0.00852038	0.00731111	ENSG00000016082/ENSG00000069188/ENSG00000089094/ENSG00000174705/ENSG00000160111/ENSG00000204227/ENSG00000228520/ENSG00000235107/ENSG00000226788/ENSG00000206287/ENSG00000231115/ENSG00000138061/ENSG00000130635/ENSG00000106571/ENSG00000142319/ENSG00000276996/ENSG00000143995/ENSG00000143816/ENSG00000173482/ENSG00000146555/ENSG00000101384/ENSG00000127377/ENSG00000114251/ENSG00000106144/ENSG00000181449	25
GO:0003231	cardiac ventricle development	12/539	127/20870	0.00011334	0.00852038	0.00731111	ENSG00000016082/ENSG00000075223/ENSG00000135111/ENSG00000103148/ENSG00000145147/ENSG00000066468/ENSG00000089225/ENSG00000101384/ENSG00000114251/ENSG00000124766/ENSG00000198626/ENSG00000157168	12
GO:0061564	axon development	28/539	500/20870	0.000117218	0.00865995	0.00743087	ENSG00000016082/ENSG00000179915/ENSG00000111962/ENSG00000166963/ENSG00000273749/ENSG00000280618/ENSG00000288461/ENSG00000010810/ENSG00000075223/ENSG00000165300/ENSG00000158321/ENSG00000129116/ENSG00000106571/ENSG00000148498/ENSG00000116106/ENSG00000167178/ENSG00000080224/ENSG00000145147/ENSG00000066468/ENSG00000105426/ENSG00000018189/ENSG00000065320/ENSG00000173482/ENSG00000196277/ENSG00000136040…	28
GO:0061351	neural precursor cell proliferation	13/539	148/20870	0.000125443	0.00905428	0.00776923	ENSG00000170370/ENSG00000089094/ENSG00000102935/ENSG00000206557/ENSG00000072864/ENSG00000275911/ENSG00000106571/ENSG00000078674/ENSG00000136044/ENSG00000198846/ENSG00000066468/ENSG00000114251/ENSG00000179348	13
GO:1900006	positive regulation of dendrite development	5/539	20/20870	0.000126781	0.00905428	0.00776923	ENSG00000273749/ENSG00000280618/ENSG00000288461/ENSG00000136848/ENSG00000147852	5
GO:0010812	negative regulation of cell-substrate adhesion	9/539	75/20870	0.000132063	0.00913198	0.00783591	ENSG00000164741/ENSG00000288673/ENSG00000141556/ENSG00000278759/ENSG00000111846/ENSG00000285222/ENSG00000196581/ENSG00000101384/ENSG00000144824	9
GO:0035107	appendage morphogenesis	13/539	149/20870	0.000134263	0.00913198	0.00783591	ENSG00000075223/ENSG00000124813/ENSG00000187240/ENSG00000106571/ENSG00000217236/ENSG00000135111/ENSG00000248905/ENSG00000066468/ENSG00000089225/ENSG00000078399/ENSG00000006377/ENSG00000114251/ENSG00000124766	13
GO:0035108	limb morphogenesis	13/539	149/20870	0.000134263	0.00913198	0.00783591	ENSG00000075223/ENSG00000124813/ENSG00000187240/ENSG00000106571/ENSG00000217236/ENSG00000135111/ENSG00000248905/ENSG00000066468/ENSG00000089225/ENSG00000078399/ENSG00000006377/ENSG00000114251/ENSG00000124766	13
GO:0048675	axon extension	12/539	130/20870	0.000141682	0.00948604	0.00813971	ENSG00000273749/ENSG00000280618/ENSG00000288461/ENSG00000075223/ENSG00000158321/ENSG00000167178/ENSG00000145147/ENSG00000105426/ENSG00000018189/ENSG00000065320/ENSG00000114251/ENSG00000118257	12
GO:0051494	negative regulation of cytoskeleton organization	14/539	171/20870	0.000147991	0.009756	0.00837135	ENSG00000164741/ENSG00000288673/ENSG00000134775/ENSG00000141556/ENSG00000278759/ENSG00000197321/ENSG00000070182/ENSG00000145147/ENSG00000128849/ENSG00000115306/ENSG00000132854/ENSG00000144824/ENSG00000067798/ENSG00000283154	14
GO:0001654	eye development	24/539	405/20870	0.000153576	0.00997082	0.00855569	ENSG00000069188/ENSG00000089094/ENSG00000174705/ENSG00000160111/ENSG00000204227/ENSG00000228520/ENSG00000235107/ENSG00000226788/ENSG00000206287/ENSG00000231115/ENSG00000138061/ENSG00000130635/ENSG00000106571/ENSG00000142319/ENSG00000276996/ENSG00000143995/ENSG00000143816/ENSG00000173482/ENSG00000146555/ENSG00000101384/ENSG00000127377/ENSG00000114251/ENSG00000106144/ENSG00000181449	24
GO:0060537	muscle tissue development	25/539	432/20870	0.000162752	0.0102297	0.00877785	ENSG00000016082/ENSG00000152661/ENSG00000134775/ENSG00000075223/ENSG00000169884/ENSG00000064655/ENSG00000163659/ENSG00000197321/ENSG00000112062/ENSG00000048052/ENSG00000106511/ENSG00000115593/ENSG00000135111/ENSG00000103148/ENSG00000066468/ENSG00000143995/ENSG00000089225/ENSG00000159216/ENSG00000170345/ENSG00000114251/ENSG00000130700/ENSG00000198626/ENSG00000136068/ENSG00000157168/ENSG00000178209	25
GO:0045780	positive regulation of bone resorption	5/539	21/20870	0.000162883	0.0102297	0.00877785	ENSG00000225190/ENSG00000276358/ENSG00000277111/ENSG00000155846/ENSG00000141655	5
GO:0021983	pituitary gland development	7/539	46/20870	0.000164726	0.0102297	0.00877785	ENSG00000016082/ENSG00000134954/ENSG00000142319/ENSG00000276996/ENSG00000114251/ENSG00000179348/ENSG00000181449	7
GO:0001659	temperature homeostasis	15/539	195/20870	0.000173741	0.0106354	0.00912598	ENSG00000180818/ENSG00000152661/ENSG00000102935/ENSG00000169884/ENSG00000221818/ENSG00000151726/ENSG00000197102/ENSG00000115896/ENSG00000136044/ENSG00000151694/ENSG00000140718/ENSG00000154822/ENSG00000284017/ENSG00000155846/ENSG00000141655	15
GO:0150063	visual system development	24/539	409/20870	0.000177948	0.0107396	0.00921532	ENSG00000069188/ENSG00000089094/ENSG00000174705/ENSG00000160111/ENSG00000204227/ENSG00000228520/ENSG00000235107/ENSG00000226788/ENSG00000206287/ENSG00000231115/ENSG00000138061/ENSG00000130635/ENSG00000106571/ENSG00000142319/ENSG00000276996/ENSG00000143995/ENSG00000143816/ENSG00000173482/ENSG00000146555/ENSG00000101384/ENSG00000127377/ENSG00000114251/ENSG00000106144/ENSG00000181449	24
GO:0032535	regulation of cellular component size	24/539	411/20870	0.000191374	0.0113826	0.00976708	ENSG00000141564/ENSG00000273749/ENSG00000280618/ENSG00000288461/ENSG00000134775/ENSG00000117020/ENSG00000275199/ENSG00000075223/ENSG00000136717/ENSG00000124067/ENSG00000197321/ENSG00000070182/ENSG00000158092/ENSG00000167178/ENSG00000248905/ENSG00000145147/ENSG00000184838/ENSG00000105426/ENSG00000018189/ENSG00000156113/ENSG00000065320/ENSG00000115306/ENSG00000132854/ENSG00000114251	24
GO:0008361	regulation of cell size	15/539	197/20870	0.000194297	0.0113826	0.00976708	ENSG00000141564/ENSG00000273749/ENSG00000280618/ENSG00000288461/ENSG00000117020/ENSG00000275199/ENSG00000075223/ENSG00000124067/ENSG00000167178/ENSG00000184838/ENSG00000105426/ENSG00000018189/ENSG00000156113/ENSG00000065320/ENSG00000114251	15
GO:0014706	striated muscle tissue development	24/539	412/20870	0.000198418	0.0113826	0.00976708	ENSG00000016082/ENSG00000152661/ENSG00000134775/ENSG00000075223/ENSG00000169884/ENSG00000064655/ENSG00000197321/ENSG00000112062/ENSG00000048052/ENSG00000106511/ENSG00000115593/ENSG00000135111/ENSG00000103148/ENSG00000066468/ENSG00000143995/ENSG00000089225/ENSG00000159216/ENSG00000170345/ENSG00000114251/ENSG00000130700/ENSG00000198626/ENSG00000136068/ENSG00000157168/ENSG00000178209	24
GO:0006639	acylglycerol metabolic process	13/539	155/20870	0.000199228	0.0113826	0.00976708	ENSG00000091583/ENSG00000123684/ENSG00000151726/ENSG00000073060/ENSG00000110090/ENSG00000168477/ENSG00000229341/ENSG00000229353/ENSG00000236221/ENSG00000231608/ENSG00000206258/ENSG00000236236/ENSG00000233323	13
GO:0048704	embryonic skeletal system morphogenesis	10/539	97/20870	0.000204216	0.0114826	0.00985287	ENSG00000198353/ENSG00000176842/ENSG00000124813/ENSG00000106571/ENSG00000066468/ENSG00000173917/ENSG00000078399/ENSG00000156103/ENSG00000182742/ENSG00000120075	10
GO:0035330	regulation of hippo signaling	5/539	22/20870	0.000206338	0.0114826	0.00985287	ENSG00000129474/ENSG00000112062/ENSG00000113645/ENSG00000283154/ENSG00000151967	5
GO:0006638	neutral lipid metabolic process	13/539	156/20870	0.000212329	0.011628	0.00997767	ENSG00000091583/ENSG00000123684/ENSG00000151726/ENSG00000073060/ENSG00000110090/ENSG00000168477/ENSG00000229341/ENSG00000229353/ENSG00000236221/ENSG00000231608/ENSG00000206258/ENSG00000236236/ENSG00000233323	13
GO:0120163	negative regulation of cold-induced thermogenesis	7/539	48/20870	0.000216736	0.011628	0.00997767	ENSG00000180818/ENSG00000102935/ENSG00000169884/ENSG00000115896/ENSG00000151694/ENSG00000154822/ENSG00000284017	7
GO:0021536	diencephalon development	9/539	80/20870	0.000217599	0.011628	0.00997767	ENSG00000016082/ENSG00000134954/ENSG00000115507/ENSG00000142319/ENSG00000276996/ENSG00000114251/ENSG00000118257/ENSG00000179348/ENSG00000181449	9
GO:0030178	negative regulation of Wnt signaling pathway	14/539	178/20870	0.000225194	0.011628	0.00997767	ENSG00000135299/ENSG00000016082/ENSG00000171444/ENSG00000136848/ENSG00000106571/ENSG00000112062/ENSG00000165566/ENSG00000186153/ENSG00000167693/ENSG00000281300/ENSG00000280563/ENSG00000114251/ENSG00000122870/ENSG00000181449	14
GO:0106106	cold-induced thermogenesis	13/539	157/20870	0.000226162	0.011628	0.00997767	ENSG00000180818/ENSG00000152661/ENSG00000102935/ENSG00000169884/ENSG00000221818/ENSG00000151726/ENSG00000197102/ENSG00000115896/ENSG00000136044/ENSG00000151694/ENSG00000154822/ENSG00000284017/ENSG00000155846	13
GO:0120161	regulation of cold-induced thermogenesis	13/539	157/20870	0.000226162	0.011628	0.00997767	ENSG00000180818/ENSG00000152661/ENSG00000102935/ENSG00000169884/ENSG00000221818/ENSG00000151726/ENSG00000197102/ENSG00000115896/ENSG00000136044/ENSG00000151694/ENSG00000154822/ENSG00000284017/ENSG00000155846	13
GO:0050807	regulation of synapse organization	17/539	245/20870	0.000228518	0.011628	0.00997767	ENSG00000110324/ENSG00000179915/ENSG00000273749/ENSG00000280618/ENSG00000288461/ENSG00000010810/ENSG00000136848/ENSG00000165300/ENSG00000111249/ENSG00000174482/ENSG00000112062/ENSG00000196083/ENSG00000116106/ENSG00000105426/ENSG00000065320/ENSG00000114251/ENSG00000118257	17
GO:0030111	regulation of Wnt signaling pathway	21/539	341/20870	0.00023306	0.011628	0.00997767	ENSG00000135299/ENSG00000060237/ENSG00000016082/ENSG00000171444/ENSG00000136848/ENSG00000169884/ENSG00000106571/ENSG00000112062/ENSG00000165566/ENSG00000179399/ENSG00000169862/ENSG00000066468/ENSG00000186153/ENSG00000189319/ENSG00000167693/ENSG00000281300/ENSG00000280563/ENSG00000114251/ENSG00000122870/ENSG00000124766/ENSG00000181449	21
GO:0002011	morphogenesis of an epithelial sheet	8/539	64/20870	0.000233374	0.011628	0.00997767	ENSG00000130635/ENSG00000129474/ENSG00000151694/ENSG00000173917/ENSG00000182742/ENSG00000101384/ENSG00000144824/ENSG00000114251	8
GO:0032970	regulation of actin filament-based process	24/539	422/20870	0.000282526	0.0139152	0.0119403	ENSG00000164741/ENSG00000288673/ENSG00000089159/ENSG00000273749/ENSG00000280618/ENSG00000288461/ENSG00000134775/ENSG00000136717/ENSG00000163399/ENSG00000197321/ENSG00000143322/ENSG00000100345/ENSG00000070182/ENSG00000111348/ENSG00000158092/ENSG00000248905/ENSG00000145147/ENSG00000128849/ENSG00000064042/ENSG00000115306/ENSG00000145730/ENSG00000132854/ENSG00000144824/ENSG00000198626	24
GO:0070527	platelet aggregation	9/539	83/20870	0.000288076	0.0140273	0.0120365	ENSG00000100345/ENSG00000173918/ENSG00000213719/ENSG00000226651/ENSG00000230685/ENSG00000223639/ENSG00000226417/ENSG00000226248/ENSG00000206394	9
GO:0030168	platelet activation	12/539	142/20870	0.000323758	0.0155877	0.0133753	ENSG00000110799/ENSG00000100345/ENSG00000112062/ENSG00000173918/ENSG00000197943/ENSG00000213719/ENSG00000226651/ENSG00000230685/ENSG00000223639/ENSG00000226417/ENSG00000226248/ENSG00000206394	12
GO:0050803	regulation of synapse structure or activity	17/539	253/20870	0.000332753	0.0158035	0.0135606	ENSG00000110324/ENSG00000179915/ENSG00000273749/ENSG00000280618/ENSG00000288461/ENSG00000010810/ENSG00000136848/ENSG00000165300/ENSG00000111249/ENSG00000174482/ENSG00000112062/ENSG00000196083/ENSG00000116106/ENSG00000105426/ENSG00000065320/ENSG00000114251/ENSG00000118257	17
GO:0048562	embryonic organ morphogenesis	19/539	301/20870	0.000335618	0.0158035	0.0135606	ENSG00000198353/ENSG00000089094/ENSG00000176842/ENSG00000124813/ENSG00000115507/ENSG00000106571/ENSG00000135111/ENSG00000066468/ENSG00000173917/ENSG00000065320/ENSG00000078399/ENSG00000156103/ENSG00000006377/ENSG00000182742/ENSG00000114251/ENSG00000179348/ENSG00000198626/ENSG00000120075/ENSG00000133816	19
GO:0048638	regulation of developmental growth	21/539	351/20870	0.000343366	0.0159927	0.0137229	ENSG00000273749/ENSG00000280618/ENSG00000288461/ENSG00000152661/ENSG00000075223/ENSG00000112062/ENSG00000142319/ENSG00000276996/ENSG00000167178/ENSG00000066468/ENSG00000143995/ENSG00000140718/ENSG00000089225/ENSG00000105426/ENSG00000018189/ENSG00000065320/ENSG00000159216/ENSG00000149187/ENSG00000113645/ENSG00000114251/ENSG00000253729	21
GO:0050770	regulation of axonogenesis	13/539	165/20870	0.000367352	0.0169259	0.0145236	ENSG00000111962/ENSG00000273749/ENSG00000280618/ENSG00000288461/ENSG00000075223/ENSG00000116106/ENSG00000167178/ENSG00000145147/ENSG00000105426/ENSG00000018189/ENSG00000065320/ENSG00000136040/ENSG00000114251	13
GO:0003205	cardiac chamber development	13/539	166/20870	0.00038939	0.017609	0.0151098	ENSG00000016082/ENSG00000075223/ENSG00000135111/ENSG00000103148/ENSG00000145147/ENSG00000066468/ENSG00000089225/ENSG00000101384/ENSG00000114251/ENSG00000118257/ENSG00000124766/ENSG00000198626/ENSG00000157168	13
GO:0006929	substrate-dependent cell migration	5/539	25/20870	0.000390502	0.017609	0.0151098	ENSG00000081237/ENSG00000262418/ENSG00000158092/ENSG00000145147/ENSG00000065320	5
GO:1900027	regulation of ruffle assembly	6/539	38/20870	0.000394507	0.017609	0.0151098	ENSG00000273749/ENSG00000280618/ENSG00000288461/ENSG00000225190/ENSG00000276358/ENSG00000277111	6
GO:0046580	negative regulation of Ras protein signal transduction	7/539	53/20870	0.000406031	0.0177771	0.0152541	ENSG00000164741/ENSG00000288673/ENSG00000136848/ENSG00000143322/ENSG00000035862/ENSG00000185989/ENSG00000280477	7
GO:1901888	regulation of cell junction assembly	16/539	234/20870	0.000407171	0.0177771	0.0152541	ENSG00000179915/ENSG00000164741/ENSG00000288673/ENSG00000152661/ENSG00000165300/ENSG00000111249/ENSG00000174482/ENSG00000196083/ENSG00000248905/ENSG00000124216/ENSG00000064042/ENSG00000089225/ENSG00000105426/ENSG00000065320/ENSG00000144824/ENSG00000114251	16
GO:0048732	gland development	26/539	486/20870	0.00041072	0.0177771	0.0152541	ENSG00000016082/ENSG00000134954/ENSG00000185950/ENSG00000075223/ENSG00000170430/ENSG00000106571/ENSG00000091831/ENSG00000142319/ENSG00000276996/ENSG00000196498/ENSG00000135111/ENSG00000066468/ENSG00000110090/ENSG00000065320/ENSG00000078399/ENSG00000145730/ENSG00000116539/ENSG00000197724/ENSG00000002822/ENSG00000147862/ENSG00000114251/ENSG00000179348/ENSG00000141655/ENSG00000181449/ENSG00000253729…	26
GO:0060828	regulation of canonical Wnt signaling pathway	17/539	260/20870	0.000455501	0.0195182	0.0167481	ENSG00000135299/ENSG00000060237/ENSG00000016082/ENSG00000171444/ENSG00000136848/ENSG00000169884/ENSG00000106571/ENSG00000112062/ENSG00000165566/ENSG00000179399/ENSG00000169862/ENSG00000066468/ENSG00000189319/ENSG00000114251/ENSG00000122870/ENSG00000124766/ENSG00000181449	17
GO:0008154	actin polymerization or depolymerization	16/539	238/20870	0.000490474	0.0206047	0.0176804	ENSG00000273749/ENSG00000280618/ENSG00000288461/ENSG00000134775/ENSG00000136717/ENSG00000243156/ENSG00000007237/ENSG00000197321/ENSG00000070182/ENSG00000158092/ENSG00000131504/ENSG00000248905/ENSG00000145147/ENSG00000115306/ENSG00000132854/ENSG00000133816	16
GO:0010810	regulation of cell-substrate adhesion	16/539	238/20870	0.000490474	0.0206047	0.0176804	ENSG00000164741/ENSG00000288673/ENSG00000114646/ENSG00000150760/ENSG00000141556/ENSG00000278759/ENSG00000111846/ENSG00000285222/ENSG00000132669/ENSG00000196581/ENSG00000248905/ENSG00000064042/ENSG00000116962/ENSG00000163520/ENSG00000101384/ENSG00000144824	16
GO:0009410	response to xenobiotic stimulus	26/539	493/20870	0.000508941	0.0209078	0.0179404	ENSG00000170370/ENSG00000106546/ENSG00000141564/ENSG00000166741/ENSG00000010810/ENSG00000075223/ENSG00000265972/ENSG00000170430/ENSG00000163399/ENSG00000182256/ENSG00000151726/ENSG00000134202/ENSG00000138061/ENSG00000142319/ENSG00000276996/ENSG00000151694/ENSG00000177426/ENSG00000110090/ENSG00000065989/ENSG00000173482/ENSG00000145730/ENSG00000035862/ENSG00000170345/ENSG00000164761/ENSG00000167972…	26
GO:0016574	histone ubiquitination	7/539	55/20870	0.000511335	0.0209078	0.0179404	ENSG00000089094/ENSG00000204227/ENSG00000228520/ENSG00000235107/ENSG00000226788/ENSG00000206287/ENSG00000231115	7
GO:0001503	ossification	24/539	440/20870	0.00051527	0.0209078	0.0179404	ENSG00000020633/ENSG00000164199/ENSG00000163815/ENSG00000124813/ENSG00000169884/ENSG00000106571/ENSG00000112062/ENSG00000124216/ENSG00000066468/ENSG00000186153/ENSG00000156103/ENSG00000159216/ENSG00000101384/ENSG00000114251/ENSG00000155846/ENSG00000141655/ENSG00000213719/ENSG00000226651/ENSG00000230685/ENSG00000223639/ENSG00000226417/ENSG00000226248/ENSG00000206394/ENSG00000181449	24
GO:1990845	adaptive thermogenesis	13/539	171/20870	0.000517205	0.0209078	0.0179404	ENSG00000180818/ENSG00000152661/ENSG00000102935/ENSG00000169884/ENSG00000221818/ENSG00000151726/ENSG00000197102/ENSG00000115896/ENSG00000136044/ENSG00000151694/ENSG00000154822/ENSG00000284017/ENSG00000155846	13
GO:0003208	cardiac ventricle morphogenesis	8/539	73/20870	0.000578866	0.0229671	0.0197074	ENSG00000016082/ENSG00000075223/ENSG00000066468/ENSG00000089225/ENSG00000101384/ENSG00000124766/ENSG00000198626/ENSG00000157168	8
GO:0072089	stem cell proliferation	8/539	73/20870	0.000578866	0.0229671	0.0197074	ENSG00000152661/ENSG00000206557/ENSG00000169884/ENSG00000081237/ENSG00000262418/ENSG00000135111/ENSG00000159216/ENSG00000114251	8
GO:0045667	regulation of osteoblast differentiation	12/539	152/20870	0.000600164	0.0233839	0.0200651	ENSG00000124813/ENSG00000169884/ENSG00000106571/ENSG00000066468/ENSG00000101384/ENSG00000213719/ENSG00000226651/ENSG00000230685/ENSG00000223639/ENSG00000226417/ENSG00000226248/ENSG00000206394	12
GO:0060348	bone development	15/539	219/20870	0.000600287	0.0233839	0.0200651	ENSG00000114861/ENSG00000152661/ENSG00000174705/ENSG00000124813/ENSG00000081237/ENSG00000262418/ENSG00000106571/ENSG00000112062/ENSG00000128606/ENSG00000114439/ENSG00000066468/ENSG00000143995/ENSG00000156103/ENSG00000053254/ENSG00000182742	15
GO:1905244	regulation of modification of synaptic structure	4/539	16/20870	0.000625338	0.0238539	0.0204684	ENSG00000273749/ENSG00000280618/ENSG00000288461/ENSG00000116106	4
GO:0006749	glutathione metabolic process	8/539	74/20870	0.00063462	0.0238539	0.0204684	ENSG00000134202/ENSG00000213719/ENSG00000226651/ENSG00000230685/ENSG00000223639/ENSG00000226417/ENSG00000226248/ENSG00000206394	8
GO:0032623	interleukin-2 production	8/539	74/20870	0.00063462	0.0238539	0.0204684	ENSG00000127191/ENSG00000081237/ENSG00000262418/ENSG00000134258/ENSG00000115306/ENSG00000159216/ENSG00000197943/ENSG00000067798	8
GO:0032663	regulation of interleukin-2 production	8/539	74/20870	0.00063462	0.0238539	0.0204684	ENSG00000127191/ENSG00000081237/ENSG00000262418/ENSG00000134258/ENSG00000115306/ENSG00000159216/ENSG00000197943/ENSG00000067798	8
GO:0060021	roof of mouth development	9/539	93/20870	0.000671736	0.0250295	0.0214771	ENSG00000163659/ENSG00000106571/ENSG00000106511/ENSG00000135111/ENSG00000103148/ENSG00000124216/ENSG00000173068/ENSG00000006377/ENSG00000114251	9
GO:0046486	glycerolipid metabolic process	24/539	449/20870	0.000684831	0.0252974	0.021707	ENSG00000091583/ENSG00000144645/ENSG00000014914/ENSG00000123684/ENSG00000213398/ENSG00000151726/ENSG00000073060/ENSG00000163803/ENSG00000129474/ENSG00000172197/ENSG00000110090/ENSG00000168477/ENSG00000229341/ENSG00000229353/ENSG00000236221/ENSG00000231608/ENSG00000206258/ENSG00000236236/ENSG00000233323/ENSG00000070748/ENSG00000070214/ENSG00000197943/ENSG00000108474/ENSG00000167972	24
GO:0007162	negative regulation of cell adhesion	21/539	371/20870	0.000707004	0.0258933	0.0222183	ENSG00000020633/ENSG00000060237/ENSG00000164741/ENSG00000288673/ENSG00000081237/ENSG00000262418/ENSG00000141556/ENSG00000278759/ENSG00000138061/ENSG00000106571/ENSG00000111846/ENSG00000285222/ENSG00000134258/ENSG00000173918/ENSG00000111348/ENSG00000196581/ENSG00000159216/ENSG00000101384/ENSG00000136040/ENSG00000144824/ENSG00000002822	21
GO:0007596	blood coagulation	16/539	247/20870	0.000732858	0.0266127	0.0228356	ENSG00000091583/ENSG00000126218/ENSG00000110799/ENSG00000100345/ENSG00000100099/ENSG00000112062/ENSG00000173918/ENSG00000197943/ENSG00000149131/ENSG00000213719/ENSG00000226651/ENSG00000230685/ENSG00000223639/ENSG00000226417/ENSG00000226248/ENSG00000206394	16
GO:0050878	regulation of body fluid levels	23/539	425/20870	0.000744168	0.0267963	0.0229932	ENSG00000060237/ENSG00000091583/ENSG00000152661/ENSG00000126218/ENSG00000110799/ENSG00000100345/ENSG00000100099/ENSG00000112062/ENSG00000142319/ENSG00000276996/ENSG00000173918/ENSG00000196498/ENSG00000145730/ENSG00000197943/ENSG00000149131/ENSG00000213719/ENSG00000226651/ENSG00000230685/ENSG00000223639/ENSG00000226417/ENSG00000226248/ENSG00000206394/ENSG00000178209	23
GO:1902904	negative regulation of supramolecular fiber organization	13/539	178/20870	0.000754504	0.0269421	0.0231183	ENSG00000164741/ENSG00000288673/ENSG00000134775/ENSG00000141556/ENSG00000278759/ENSG00000197321/ENSG00000070182/ENSG00000145147/ENSG00000128849/ENSG00000115306/ENSG00000132854/ENSG00000144824/ENSG00000067798	13
GO:0099170	postsynaptic modulation of chemical synaptic transmission	4/539	17/20870	0.000801149	0.0281531	0.0241574	ENSG00000273749/ENSG00000280618/ENSG00000288461/ENSG00000154146	4
GO:0120034	positive regulation of plasma membrane bounded cell projection assembly	10/539	115/20870	0.00080156	0.0281531	0.0241574	ENSG00000273749/ENSG00000280618/ENSG00000288461/ENSG00000184640/ENSG00000282302/ENSG00000011426/ENSG00000158321/ENSG00000225190/ENSG00000276358/ENSG00000277111	10
GO:0110053	regulation of actin filament organization	18/539	299/20870	0.000828441	0.0288607	0.0247646	ENSG00000164741/ENSG00000288673/ENSG00000089159/ENSG00000273749/ENSG00000280618/ENSG00000288461/ENSG00000134775/ENSG00000136717/ENSG00000197321/ENSG00000070182/ENSG00000158092/ENSG00000248905/ENSG00000145147/ENSG00000128849/ENSG00000064042/ENSG00000115306/ENSG00000132854/ENSG00000144824	18
GO:0043405	regulation of MAP kinase activity	14/539	203/20870	0.00084453	0.0291839	0.0250419	ENSG00000127191/ENSG00000136848/ENSG00000129474/ENSG00000116106/ENSG00000168477/ENSG00000229341/ENSG00000229353/ENSG00000236221/ENSG00000231608/ENSG00000206258/ENSG00000236236/ENSG00000233323/ENSG00000114251/ENSG00000141655	14
GO:0043010	camera-type eye development	20/539	351/20870	0.000865575	0.0296719	0.0254607	ENSG00000069188/ENSG00000089094/ENSG00000204227/ENSG00000228520/ENSG00000235107/ENSG00000226788/ENSG00000206287/ENSG00000231115/ENSG00000138061/ENSG00000106571/ENSG00000142319/ENSG00000276996/ENSG00000143995/ENSG00000143816/ENSG00000173482/ENSG00000146555/ENSG00000101384/ENSG00000127377/ENSG00000114251/ENSG00000106144	20
GO:0050678	regulation of epithelial cell proliferation	22/539	404/20870	0.000887333	0.0300325	0.02577	ENSG00000020633/ENSG00000016082/ENSG00000141564/ENSG00000091583/ENSG00000171444/ENSG00000152661/ENSG00000117020/ENSG00000275199/ENSG00000136848/ENSG00000169884/ENSG00000163082/ENSG00000091136/ENSG00000151694/ENSG00000066468/ENSG00000173482/ENSG00000006377/ENSG00000147862/ENSG00000114251/ENSG00000118257/ENSG00000179348/ENSG00000181449/ENSG00000253729	22
GO:0021537	telencephalon development	17/539	276/20870	0.00089011	0.0300325	0.02577	ENSG00000170370/ENSG00000089094/ENSG00000136848/ENSG00000072864/ENSG00000275911/ENSG00000138772/ENSG00000106571/ENSG00000111783/ENSG00000091136/ENSG00000145147/ENSG00000105426/ENSG00000149187/ENSG00000147862/ENSG00000114251/ENSG00000149571/ENSG00000154146/ENSG00000157168	17
GO:0050817	coagulation	16/539	252/20870	0.000907107	0.0303668	0.0260569	ENSG00000091583/ENSG00000126218/ENSG00000110799/ENSG00000100345/ENSG00000100099/ENSG00000112062/ENSG00000173918/ENSG00000197943/ENSG00000149131/ENSG00000213719/ENSG00000226651/ENSG00000230685/ENSG00000223639/ENSG00000226417/ENSG00000226248/ENSG00000206394	16
GO:0007599	hemostasis	16/539	253/20870	0.000945882	0.0311777	0.0267528	ENSG00000091583/ENSG00000126218/ENSG00000110799/ENSG00000100345/ENSG00000100099/ENSG00000112062/ENSG00000173918/ENSG00000197943/ENSG00000149131/ENSG00000213719/ENSG00000226651/ENSG00000230685/ENSG00000223639/ENSG00000226417/ENSG00000226248/ENSG00000206394	16
GO:0060560	developmental growth involved in morphogenesis	16/539	253/20870	0.000945882	0.0311777	0.0267528	ENSG00000273749/ENSG00000280618/ENSG00000288461/ENSG00000075223/ENSG00000158321/ENSG00000154059/ENSG00000091831/ENSG00000167178/ENSG00000248905/ENSG00000145147/ENSG00000066468/ENSG00000105426/ENSG00000018189/ENSG00000065320/ENSG00000114251/ENSG00000118257	16
GO:0050673	epithelial cell proliferation	24/539	461/20870	0.000985253	0.0321245	0.0275652	ENSG00000020633/ENSG00000016082/ENSG00000141564/ENSG00000091583/ENSG00000171444/ENSG00000152661/ENSG00000117020/ENSG00000275199/ENSG00000136848/ENSG00000169884/ENSG00000073060/ENSG00000163082/ENSG00000091831/ENSG00000091136/ENSG00000151694/ENSG00000066468/ENSG00000173482/ENSG00000006377/ENSG00000147862/ENSG00000114251/ENSG00000118257/ENSG00000179348/ENSG00000181449/ENSG00000253729	24
GO:0032956	regulation of actin cytoskeleton organization	21/539	381/20870	0.000990034	0.0321245	0.0275652	ENSG00000164741/ENSG00000288673/ENSG00000089159/ENSG00000273749/ENSG00000280618/ENSG00000288461/ENSG00000134775/ENSG00000136717/ENSG00000197321/ENSG00000143322/ENSG00000070182/ENSG00000111348/ENSG00000158092/ENSG00000248905/ENSG00000145147/ENSG00000128849/ENSG00000064042/ENSG00000115306/ENSG00000145730/ENSG00000132854/ENSG00000144824	21
GO:0001764	neuron migration	12/539	161/20870	0.000997098	0.0321245	0.0275652	ENSG00000010810/ENSG00000148219/ENSG00000136848/ENSG00000072864/ENSG00000275911/ENSG00000158321/ENSG00000078674/ENSG00000065320/ENSG00000118257/ENSG00000179348/ENSG00000149571/ENSG00000157168	12
GO:0051127	positive regulation of actin nucleation	4/539	18/20870	0.00100916	0.0322704	0.0276903	ENSG00000273749/ENSG00000280618/ENSG00000288461/ENSG00000248905	4
GO:0001649	osteoblast differentiation	16/539	255/20870	0.00102767	0.0326189	0.0279894	ENSG00000124813/ENSG00000169884/ENSG00000106571/ENSG00000112062/ENSG00000124216/ENSG00000066468/ENSG00000186153/ENSG00000101384/ENSG00000213719/ENSG00000226651/ENSG00000230685/ENSG00000223639/ENSG00000226417/ENSG00000226248/ENSG00000206394/ENSG00000181449	16
GO:0050804	modulation of chemical synaptic transmission	25/539	492/20870	0.00109582	0.0343063	0.0294373	ENSG00000142408/ENSG00000058335/ENSG00000179915/ENSG00000166963/ENSG00000114646/ENSG00000273749/ENSG00000280618/ENSG00000288461/ENSG00000010810/ENSG00000111249/ENSG00000096433/ENSG00000184985/ENSG00000115896/ENSG00000196639/ENSG00000116106/ENSG00000127955/ENSG00000145920/ENSG00000105426/ENSG00000196277/ENSG00000154822/ENSG00000284017/ENSG00000118160/ENSG00000188191/ENSG00000154146/ENSG00000156395	25
GO:0007204	positive regulation of cytosolic calcium ion concentration	19/539	332/20870	0.00109684	0.0343063	0.0294373	ENSG00000122420/ENSG00000010810/ENSG00000152661/ENSG00000081237/ENSG00000262418/ENSG00000143322/ENSG00000096433/ENSG00000091831/ENSG00000198838/ENSG00000173918/ENSG00000131504/ENSG00000168398/ENSG00000197943/ENSG00000118160/ENSG00000179348/ENSG00000198626/ENSG00000010310/ENSG00000185989/ENSG00000280477	19
GO:0003197	endocardial cushion development	6/539	46/20870	0.00112456	0.0344994	0.029603	ENSG00000016082/ENSG00000135111/ENSG00000124216/ENSG00000089225/ENSG00000101384/ENSG00000130700	6
GO:0021517	ventral spinal cord development	6/539	46/20870	0.00112456	0.0344994	0.029603	ENSG00000016082/ENSG00000187240/ENSG00000106571/ENSG00000147852/ENSG00000179348/ENSG00000124766	6
GO:0099177	regulation of trans-synaptic signaling	25/539	493/20870	0.00112717	0.0344994	0.029603	ENSG00000142408/ENSG00000058335/ENSG00000179915/ENSG00000166963/ENSG00000114646/ENSG00000273749/ENSG00000280618/ENSG00000288461/ENSG00000010810/ENSG00000111249/ENSG00000096433/ENSG00000184985/ENSG00000115896/ENSG00000196639/ENSG00000116106/ENSG00000127955/ENSG00000145920/ENSG00000105426/ENSG00000196277/ENSG00000154822/ENSG00000284017/ENSG00000118160/ENSG00000188191/ENSG00000154146/ENSG00000156395	25
GO:0030041	actin filament polymerization	14/539	210/20870	0.00117125	0.0355006	0.0304621	ENSG00000273749/ENSG00000280618/ENSG00000288461/ENSG00000134775/ENSG00000136717/ENSG00000007237/ENSG00000197321/ENSG00000070182/ENSG00000158092/ENSG00000131504/ENSG00000248905/ENSG00000145147/ENSG00000115306/ENSG00000132854	14
GO:0051258	protein polymerization	19/539	334/20870	0.00117645	0.0355006	0.0304621	ENSG00000273749/ENSG00000280618/ENSG00000288461/ENSG00000134775/ENSG00000136717/ENSG00000072864/ENSG00000275911/ENSG00000141556/ENSG00000278759/ENSG00000007237/ENSG00000197321/ENSG00000070182/ENSG00000158092/ENSG00000131504/ENSG00000248905/ENSG00000145147/ENSG00000115306/ENSG00000132854/ENSG00000067798	19
GO:0045124	regulation of bone resorption	6/539	47/20870	0.00126143	0.0377987	0.032434	ENSG00000164761/ENSG00000225190/ENSG00000276358/ENSG00000277111/ENSG00000155846/ENSG00000141655	6
GO:0061337	cardiac conduction	9/539	102/20870	0.00130466	0.0386783	0.0331888	ENSG00000016082/ENSG00000152661/ENSG00000136717/ENSG00000163399/ENSG00000089225/ENSG00000069431/ENSG00000118160/ENSG00000198626/ENSG00000145244	9
GO:1990138	neuron projection extension	13/539	189/20870	0.00130884	0.0386783	0.0331888	ENSG00000273749/ENSG00000280618/ENSG00000288461/ENSG00000075223/ENSG00000158321/ENSG00000154059/ENSG00000167178/ENSG00000145147/ENSG00000105426/ENSG00000018189/ENSG00000065320/ENSG00000114251/ENSG00000118257	13
GO:0032272	negative regulation of protein polymerization	8/539	83/20870	0.00135742	0.0397236	0.0340857	ENSG00000134775/ENSG00000141556/ENSG00000278759/ENSG00000197321/ENSG00000070182/ENSG00000145147/ENSG00000115306/ENSG00000132854	8
GO:0061448	connective tissue development	16/539	262/20870	0.00136275	0.0397236	0.0340857	ENSG00000020633/ENSG00000174705/ENSG00000124813/ENSG00000169884/ENSG00000221818/ENSG00000130635/ENSG00000106571/ENSG00000112062/ENSG00000177398/ENSG00000124216/ENSG00000140718/ENSG00000143816/ENSG00000159216/ENSG00000147862/ENSG00000114251/ENSG00000072840	16
GO:0045773	positive regulation of axon extension	6/539	48/20870	0.00141067	0.0405685	0.0348107	ENSG00000273749/ENSG00000280618/ENSG00000288461/ENSG00000167178/ENSG00000018189/ENSG00000065320	6
GO:0050919	negative chemotaxis	6/539	48/20870	0.00141067	0.0405685	0.0348107	ENSG00000075223/ENSG00000145147/ENSG00000065320/ENSG00000114251/ENSG00000118257/ENSG00000157168	6
GO:0051881	regulation of mitochondrial membrane potential	8/539	84/20870	0.00146711	0.0419103	0.0359621	ENSG00000169230/ENSG00000213719/ENSG00000226651/ENSG00000230685/ENSG00000223639/ENSG00000226417/ENSG00000226248/ENSG00000206394	8
GO:0060070	canonical Wnt signaling pathway	18/539	315/20870	0.00149168	0.0421683	0.0361835	ENSG00000135299/ENSG00000060237/ENSG00000016082/ENSG00000171444/ENSG00000136848/ENSG00000169884/ENSG00000106571/ENSG00000112062/ENSG00000165566/ENSG00000179399/ENSG00000169862/ENSG00000066468/ENSG00000143816/ENSG00000189319/ENSG00000114251/ENSG00000122870/ENSG00000124766/ENSG00000181449	18
GO:0030516	regulation of axon extension	9/539	104/20870	0.00149582	0.0421683	0.0361835	ENSG00000273749/ENSG00000280618/ENSG00000288461/ENSG00000075223/ENSG00000167178/ENSG00000105426/ENSG00000018189/ENSG00000065320/ENSG00000114251	9
GO:0048639	positive regulation of developmental growth	13/539	192/20870	0.00150838	0.0422168	0.0362251	ENSG00000273749/ENSG00000280618/ENSG00000288461/ENSG00000112062/ENSG00000142319/ENSG00000276996/ENSG00000167178/ENSG00000066468/ENSG00000089225/ENSG00000018189/ENSG00000065320/ENSG00000149187/ENSG00000253729	13
GO:0035313	wound healing, spreading of epidermal cells	4/539	20/20870	0.00153375	0.0422168	0.0362251	ENSG00000130635/ENSG00000129474/ENSG00000151694/ENSG00000144824	4
GO:0060216	definitive hemopoiesis	4/539	20/20870	0.00153375	0.0422168	0.0362251	ENSG00000143995/ENSG00000078399/ENSG00000182742/ENSG00000179348	4
GO:0051056	regulation of small GTPase mediated signal transduction	19/539	342/20870	0.0015461	0.0422168	0.0362251	ENSG00000058335/ENSG00000164741/ENSG00000288673/ENSG00000136848/ENSG00000159314/ENSG00000276907/ENSG00000276836/ENSG00000158321/ENSG00000143322/ENSG00000111348/ENSG00000145147/ENSG00000128849/ENSG00000136828/ENSG00000075884/ENSG00000035862/ENSG00000185989/ENSG00000280477/ENSG00000031081/ENSG00000157168	19
GO:0071900	regulation of protein serine/threonine kinase activity	21/539	395/20870	0.0015468	0.0422168	0.0362251	ENSG00000198382/ENSG00000141564/ENSG00000127191/ENSG00000136848/ENSG00000149503/ENSG00000151726/ENSG00000129474/ENSG00000151694/ENSG00000116106/ENSG00000168477/ENSG00000229341/ENSG00000229353/ENSG00000236221/ENSG00000231608/ENSG00000206258/ENSG00000236236/ENSG00000233323/ENSG00000114251/ENSG00000118160/ENSG00000188191/ENSG00000141655	21
GO:0060443	mammary gland morphogenesis	6/539	49/20870	0.001573	0.0425286	0.0364926	ENSG00000106571/ENSG00000091831/ENSG00000135111/ENSG00000066468/ENSG00000065320/ENSG00000114251	6
GO:0051480	regulation of cytosolic calcium ion concentration	20/539	369/20870	0.00157968	0.0425286	0.0364926	ENSG00000122420/ENSG00000010810/ENSG00000152661/ENSG00000081237/ENSG00000262418/ENSG00000143322/ENSG00000096433/ENSG00000091831/ENSG00000198838/ENSG00000173918/ENSG00000131504/ENSG00000168398/ENSG00000197943/ENSG00000114251/ENSG00000118160/ENSG00000179348/ENSG00000198626/ENSG00000010310/ENSG00000185989/ENSG00000280477	20
GO:1902903	regulation of supramolecular fiber organization	22/539	423/20870	0.00159525	0.0425286	0.0364926	ENSG00000164741/ENSG00000288673/ENSG00000089159/ENSG00000166963/ENSG00000273749/ENSG00000280618/ENSG00000288461/ENSG00000134775/ENSG00000136717/ENSG00000141556/ENSG00000278759/ENSG00000197321/ENSG00000070182/ENSG00000158092/ENSG00000248905/ENSG00000145147/ENSG00000128849/ENSG00000064042/ENSG00000115306/ENSG00000132854/ENSG00000144824/ENSG00000067798	22
GO:0048863	stem cell differentiation	14/539	217/20870	0.00159792	0.0425286	0.0364926	ENSG00000016082/ENSG00000075223/ENSG00000124813/ENSG00000081237/ENSG00000262418/ENSG00000091831/ENSG00000066468/ENSG00000089225/ENSG00000134644/ENSG00000182742/ENSG00000101384/ENSG00000118257/ENSG00000253729/ENSG00000157168	14
GO:0071559	response to transforming growth factor beta	16/539	268/20870	0.00171917	0.0454731	0.0390192	ENSG00000020633/ENSG00000089159/ENSG00000010810/ENSG00000163815/ENSG00000090006/ENSG00000140836/ENSG00000111846/ENSG00000285222/ENSG00000136044/ENSG00000151694/ENSG00000197415/ENSG00000066468/ENSG00000186153/ENSG00000134871/ENSG00000170345/ENSG00000114251	16
GO:0006384	transcription initiation from RNA polymerase III promoter	3/539	10/20870	0.0017952	0.0457883	0.0392897	ENSG00000145734/ENSG00000274803/ENSG00000273873	3
GO:0042420	dopamine catabolic process	3/539	10/20870	0.0017952	0.0457883	0.0392897	ENSG00000142319/ENSG00000276996/ENSG00000079931	3
GO:0045586	regulation of gamma-delta T cell differentiation	3/539	10/20870	0.0017952	0.0457883	0.0392897	ENSG00000081237/ENSG00000262418/ENSG00000124766	3
GO:0060920	cardiac pacemaker cell differentiation	3/539	10/20870	0.0017952	0.0457883	0.0392897	ENSG00000016082/ENSG00000135111/ENSG00000089225	3
GO:1900119	positive regulation of execution phase of apoptosis	3/539	10/20870	0.0017952	0.0457883	0.0392897	ENSG00000164741/ENSG00000288673/ENSG00000143514	3
GO:1900122	positive regulation of receptor binding	3/539	10/20870	0.0017952	0.0457883	0.0392897	ENSG00000115896/ENSG00000154822/ENSG00000284017	3
GO:0050772	positive regulation of axonogenesis	8/539	87/20870	0.00183888	0.0466247	0.0400074	ENSG00000273749/ENSG00000280618/ENSG00000288461/ENSG00000167178/ENSG00000145147/ENSG00000018189/ENSG00000065320/ENSG00000136040	8
GO:0003215	cardiac right ventricle morphogenesis	4/539	21/20870	0.00185631	0.04679	0.0401492	ENSG00000016082/ENSG00000075223/ENSG00000101384/ENSG00000124766	4
GO:0097553	calcium ion transmembrane import into cytosol	11/539	151/20870	0.00191694	0.0480356	0.0412181	ENSG00000010810/ENSG00000081237/ENSG00000262418/ENSG00000096433/ENSG00000198838/ENSG00000131504/ENSG00000197943/ENSG00000118160/ENSG00000198626/ENSG00000185989/ENSG00000280477	11
GO:0034109	homotypic cell-cell adhesion	9/539	108/20870	0.00194553	0.0484686	0.0415896	ENSG00000100345/ENSG00000173918/ENSG00000213719/ENSG00000226651/ENSG00000230685/ENSG00000223639/ENSG00000226417/ENSG00000226248/ENSG00000206394	9

## Sheet: Molecular Function
ID	Description	GeneRatio	BgRatio	pvalue	p.adjust	qvalue	geneID	Count
GO:0005178	integrin binding	19/543	156/20678	2.95837e-08	1.52098e-05	1.40935e-05	ENSG00000171914/ENSG00000090006/ENSG00000130635/ENSG00000110799/ENSG00000100345/ENSG00000151914/ENSG00000091136/ENSG00000151694/ENSG00000168477/ENSG00000229341/ENSG00000229353/ENSG00000236221/ENSG00000231608/ENSG00000206258/ENSG00000236236/ENSG00000233323/ENSG00000035862/ENSG00000064205/ENSG00000157168	19
GO:0003779	actin binding	35/543	473/20678	4.13873e-08	1.52098e-05	1.40935e-05	ENSG00000184361/ENSG00000127946/ENSG00000166963/ENSG00000273749/ENSG00000280618/ENSG00000288461/ENSG00000134775/ENSG00000136717/ENSG00000243156/ENSG00000171914/ENSG00000011426/ENSG00000147481/ENSG00000129116/ENSG00000007237/ENSG00000197321/ENSG00000154059/ENSG00000143322/ENSG00000142661/ENSG00000100345/ENSG00000151914/ENSG00000129474/ENSG00000157827/ENSG00000070182/ENSG00000082438/ENSG00000131504…	35
GO:0008201	heparin binding	19/543	190/20678	6.7815e-07	0.000166147	0.000153952	ENSG00000091583/ENSG00000163815/ENSG00000081237/ENSG00000262418/ENSG00000130635/ENSG00000145147/ENSG00000066468/ENSG00000166833/ENSG00000105426/ENSG00000168477/ENSG00000229341/ENSG00000229353/ENSG00000236221/ENSG00000231608/ENSG00000206258/ENSG00000236236/ENSG00000233323/ENSG00000064205/ENSG00000118257	19
GO:0097027	ubiquitin-protein transferase activator activity	6/543	15/20678	1.30488e-06	0.000239772	0.000222173	ENSG00000204227/ENSG00000228520/ENSG00000235107/ENSG00000226788/ENSG00000206287/ENSG00000231115	6
GO:0005254	chloride channel activity	12/543	85/20678	2.19258e-06	0.000271346	0.000251429	ENSG00000134343/ENSG00000182256/ENSG00000089356/ENSG00000285526/ENSG00000047617/ENSG00000213719/ENSG00000226651/ENSG00000230685/ENSG00000223639/ENSG00000226417/ENSG00000226248/ENSG00000206394	12
GO:0015103	inorganic anion transmembrane transporter activity	17/543	168/20678	2.21507e-06	0.000271346	0.000251429	ENSG00000134343/ENSG00000124067/ENSG00000182256/ENSG00000089356/ENSG00000285526/ENSG00000142319/ENSG00000276996/ENSG00000047617/ENSG00000080493/ENSG00000069431/ENSG00000213719/ENSG00000226651/ENSG00000230685/ENSG00000223639/ENSG00000226417/ENSG00000226248/ENSG00000206394	17
GO:0005201	extracellular matrix structural constituent	18/543	198/20678	5.1923e-06	0.000527321	0.000488616	ENSG00000187720/ENSG00000090006/ENSG00000130635/ENSG00000110799/ENSG00000171502/ENSG00000177398/ENSG00000091136/ENSG00000116962/ENSG00000168477/ENSG00000229341/ENSG00000229353/ENSG00000236221/ENSG00000231608/ENSG00000206258/ENSG00000236236/ENSG00000233323/ENSG00000163520/ENSG00000134871	18
GO:0005518	collagen binding	12/543	93/20678	5.73954e-06	0.000527321	0.000488616	ENSG00000110799/ENSG00000173918/ENSG00000183287/ENSG00000116962/ENSG00000168477/ENSG00000229341/ENSG00000229353/ENSG00000236221/ENSG00000231608/ENSG00000206258/ENSG00000236236/ENSG00000233323	12
GO:1901681	sulfur compound binding	22/543	289/20678	8.85583e-06	0.000664064	0.000615323	ENSG00000091583/ENSG00000163815/ENSG00000081237/ENSG00000262418/ENSG00000134202/ENSG00000130635/ENSG00000145147/ENSG00000066468/ENSG00000111218/ENSG00000166833/ENSG00000105426/ENSG00000168477/ENSG00000229341/ENSG00000229353/ENSG00000236221/ENSG00000231608/ENSG00000206258/ENSG00000236236/ENSG00000233323/ENSG00000064205/ENSG00000118257/ENSG00000198626	22
GO:0045296	cadherin binding	25/543	356/20678	9.04281e-06	0.000664064	0.000615323	ENSG00000149654/ENSG00000118898/ENSG00000136848/ENSG00000184640/ENSG00000282302/ENSG00000011426/ENSG00000100345/ENSG00000157827/ENSG00000158092/ENSG00000082438/ENSG00000169862/ENSG00000115306/ENSG00000173482/ENSG00000144824/ENSG00000105939/ENSG00000213719/ENSG00000226651/ENSG00000230685/ENSG00000223639/ENSG00000226417/ENSG00000226248/ENSG00000206394/ENSG00000136068/ENSG00000180611/ENSG00000178209	25
GO:0005253	anion channel activity	12/543	98/20678	9.93837e-06	0.000664064	0.000615323	ENSG00000134343/ENSG00000182256/ENSG00000089356/ENSG00000285526/ENSG00000047617/ENSG00000213719/ENSG00000226651/ENSG00000230685/ENSG00000223639/ENSG00000226417/ENSG00000226248/ENSG00000206394	12
GO:0005539	glycosaminoglycan binding	20/543	254/20678	1.37731e-05	0.0008436	0.000781682	ENSG00000091583/ENSG00000163815/ENSG00000081237/ENSG00000262418/ENSG00000090006/ENSG00000130635/ENSG00000145147/ENSG00000066468/ENSG00000166833/ENSG00000105426/ENSG00000168477/ENSG00000229341/ENSG00000229353/ENSG00000236221/ENSG00000231608/ENSG00000206258/ENSG00000236236/ENSG00000233323/ENSG00000064205/ENSG00000118257	20
GO:0030506	ankyrin binding	6/543	22/20678	1.66301e-05	0.00094024	0.000871229	ENSG00000081237/ENSG00000262418/ENSG00000163399/ENSG00000070182/ENSG00000115306/ENSG00000178209	6
GO:0001228	DNA-binding transcription activator activity, RNA polymerase II-specific	29/543	472/20678	2.27339e-05	0.00119353	0.00110593	ENSG00000180818/ENSG00000198353/ENSG00000016082/ENSG00000134954/ENSG00000188994/ENSG00000124813/ENSG00000221818/ENSG00000115507/ENSG00000111783/ENSG00000091831/ENSG00000106511/ENSG00000101216/ENSG00000135111/ENSG00000172379/ENSG00000178662/ENSG00000143995/ENSG00000173917/ENSG00000196628/ENSG00000089225/ENSG00000078399/ENSG00000159216/ENSG00000170345/ENSG00000147862/ENSG00000179348/ENSG00000124766…	29
GO:0001216	DNA-binding transcription activator activity	29/543	478/20678	2.86452e-05	0.00140361	0.00130059	ENSG00000180818/ENSG00000198353/ENSG00000016082/ENSG00000134954/ENSG00000188994/ENSG00000124813/ENSG00000221818/ENSG00000115507/ENSG00000111783/ENSG00000091831/ENSG00000106511/ENSG00000101216/ENSG00000135111/ENSG00000172379/ENSG00000178662/ENSG00000143995/ENSG00000173917/ENSG00000196628/ENSG00000089225/ENSG00000078399/ENSG00000159216/ENSG00000170345/ENSG00000147862/ENSG00000179348/ENSG00000124766…	29
GO:0051015	actin filament binding	18/543	234/20678	4.99095e-05	0.00229272	0.00212444	ENSG00000127946/ENSG00000273749/ENSG00000280618/ENSG00000288461/ENSG00000134775/ENSG00000136717/ENSG00000171914/ENSG00000007237/ENSG00000197321/ENSG00000143322/ENSG00000142661/ENSG00000100345/ENSG00000129474/ENSG00000157827/ENSG00000070182/ENSG00000115306/ENSG00000157483/ENSG00000136068	18
GO:0055106	ubiquitin-protein transferase regulator activity	6/543	27/20678	5.90053e-05	0.00255111	0.00236387	ENSG00000204227/ENSG00000228520/ENSG00000235107/ENSG00000226788/ENSG00000206287/ENSG00000231115	6
GO:0015278	calcium-release channel activity	5/543	18/20678	7.91026e-05	0.00323002	0.00299295	ENSG00000096433/ENSG00000198838/ENSG00000198626/ENSG00000185989/ENSG00000280477	5
GO:0005217	intracellular ligand-gated ion channel activity	6/543	31/20678	0.000134251	0.00519338	0.0048122	ENSG00000099822/ENSG00000096433/ENSG00000198838/ENSG00000198626/ENSG00000185989/ENSG00000280477	6
GO:0005001	transmembrane receptor protein tyrosine phosphatase activity	5/543	21/20678	0.000176009	0.00616032	0.00570817	ENSG00000155093/ENSG00000282185/ENSG00000081237/ENSG00000262418/ENSG00000173482	5
GO:0019198	transmembrane receptor protein phosphatase activity	5/543	21/20678	0.000176009	0.00616032	0.00570817	ENSG00000155093/ENSG00000282185/ENSG00000081237/ENSG00000262418/ENSG00000173482	5
GO:0140296	general transcription initiation factor binding	7/543	51/20678	0.000352371	0.0117724	0.0109083	ENSG00000106546/ENSG00000141564/ENSG00000145734/ENSG00000274803/ENSG00000273873/ENSG00000091831/ENSG00000196628	7
GO:0070679	inositol 1,4,5 trisphosphate binding	4/543	14/20678	0.000381711	0.0121981	0.0113028	ENSG00000096433/ENSG00000115896/ENSG00000154822/ENSG00000284017	4
GO:0043394	proteoglycan binding	6/543	39/20678	0.000498021	0.01481	0.013723	ENSG00000081237/ENSG00000262418/ENSG00000130635/ENSG00000145147/ENSG00000105426/ENSG00000116962	6
GO:0008013	beta-catenin binding	9/543	88/20678	0.000503743	0.01481	0.013723	ENSG00000089159/ENSG00000152661/ENSG00000162441/ENSG00000106571/ENSG00000091831/ENSG00000165566/ENSG00000196581/ENSG00000169862/ENSG00000196628	9
GO:0099604	ligand-gated calcium channel activity	5/543	27/20678	0.000613134	0.0173328	0.0160606	ENSG00000096433/ENSG00000198838/ENSG00000198626/ENSG00000185989/ENSG00000280477	5
GO:0005216	ion channel activity	25/543	466/20678	0.000642443	0.0174887	0.0162051	ENSG00000142408/ENSG00000114573/ENSG00000134343/ENSG00000164451/ENSG00000099822/ENSG00000182256/ENSG00000096433/ENSG00000089356/ENSG00000285526/ENSG00000198838/ENSG00000140015/ENSG00000047617/ENSG00000156113/ENSG00000069431/ENSG00000124780/ENSG00000198626/ENSG00000213719/ENSG00000226651/ENSG00000230685/ENSG00000223639/ENSG00000226417/ENSG00000226248/ENSG00000206394/ENSG00000185989/ENSG00000280477	25
GO:0004435	phosphatidylinositol phospholipase C activity	5/543	29/20678	0.00086377	0.0220905	0.0204691	ENSG00000115896/ENSG00000168398/ENSG00000154822/ENSG00000284017/ENSG00000197943	5
GO:0022836	gated channel activity	21/543	371/20678	0.000871599	0.0220905	0.0204691	ENSG00000142408/ENSG00000134343/ENSG00000099822/ENSG00000182256/ENSG00000096433/ENSG00000198838/ENSG00000140015/ENSG00000047617/ENSG00000156113/ENSG00000069431/ENSG00000124780/ENSG00000198626/ENSG00000213719/ENSG00000226651/ENSG00000230685/ENSG00000223639/ENSG00000226417/ENSG00000226248/ENSG00000206394/ENSG00000185989/ENSG00000280477	21
GO:0008081	phosphoric diester hydrolase activity	9/543	97/20678	0.00102391	0.0250859	0.0232446	ENSG00000115896/ENSG00000160191/ENSG00000065989/ENSG00000168398/ENSG00000154822/ENSG00000284017/ENSG00000197943/ENSG00000112541/ENSG00000105223	9
GO:0004629	phospholipase C activity	5/543	31/20678	0.00118364	0.0280637	0.0260039	ENSG00000115896/ENSG00000168398/ENSG00000154822/ENSG00000284017/ENSG00000197943	5
GO:0050811	GABA receptor binding	4/543	19/20678	0.00133167	0.0305869	0.0283419	ENSG00000115896/ENSG00000034713/ENSG00000154822/ENSG00000284017	4
GO:0017124	SH3 domain binding	11/543	144/20678	0.00149499	0.0332976	0.0308536	ENSG00000198382/ENSG00000143514/ENSG00000152661/ENSG00000136848/ENSG00000150760/ENSG00000159314/ENSG00000276907/ENSG00000276836/ENSG00000151694/ENSG00000248905/ENSG00000031081	11
GO:0043548	phosphatidylinositol 3-kinase binding	5/543	34/20678	0.00181706	0.0392805	0.0363974	ENSG00000185950/ENSG00000010810/ENSG00000136848/ENSG00000169047/ENSG00000163399	5
GO:0016799	hydrolase activity, hydrolyzing N-glycosyl compounds	6/543	50/20678	0.00190199	0.0399417	0.0370101	ENSG00000115594/ENSG00000172264/ENSG00000196083/ENSG00000133315/ENSG00000153064/ENSG00000153531	6
GO:0042578	phosphoric ester hydrolase activity	21/543	397/20678	0.00200704	0.0409771	0.0379695	ENSG00000155093/ENSG00000282185/ENSG00000014914/ENSG00000081237/ENSG00000262418/ENSG00000163399/ENSG00000064655/ENSG00000163082/ENSG00000170525/ENSG00000115896/ENSG00000160191/ENSG00000105426/ENSG00000065989/ENSG00000168398/ENSG00000173482/ENSG00000154822/ENSG00000284017/ENSG00000197943/ENSG00000014257/ENSG00000112541/ENSG00000105223	21
GO:0005543	phospholipid binding	24/543	483/20678	0.00227872	0.0452664	0.0419439	ENSG00000127946/ENSG00000091583/ENSG00000174705/ENSG00000198873/ENSG00000144645/ENSG00000136848/ENSG00000136717/ENSG00000126218/ENSG00000104537/ENSG00000073060/ENSG00000197321/ENSG00000138772/ENSG00000096433/ENSG00000148498/ENSG00000136044/ENSG00000165566/ENSG00000197415/ENSG00000115306/ENSG00000101384/ENSG00000048471/ENSG00000141447/ENSG00000114251/ENSG00000154146/ENSG00000157483	24

## Sheet: Cellular Component
ID	Description	GeneRatio	BgRatio	pvalue	p.adjust	qvalue	geneID	Count
GO:0001739	sex chromatin	6/548	10/21916	4.58667e-08	2.15573e-05	1.7719e-05	ENSG00000204227/ENSG00000228520/ENSG00000235107/ENSG00000226788/ENSG00000206287/ENSG00000231115	6
GO:0005903	brush border	14/548	116/21916	1.23783e-06	0.000290891	0.000239097	ENSG00000138792/ENSG00000096433/ENSG00000163803/ENSG00000100345/ENSG00000157483/ENSG00000213719/ENSG00000226651/ENSG00000230685/ENSG00000223639/ENSG00000226417/ENSG00000226248/ENSG00000206394/ENSG00000136068/ENSG00000178209	14
GO:0005938	cell cortex	23/548	322/21916	7.22534e-06	0.00110112	0.000905065	ENSG00000164741/ENSG00000288673/ENSG00000127191/ENSG00000089159/ENSG00000166444/ENSG00000148219/ENSG00000243156/ENSG00000184640/ENSG00000282302/ENSG00000011426/ENSG00000197102/ENSG00000144036/ENSG00000148498/ENSG00000100345/ENSG00000151914/ENSG00000070182/ENSG00000127955/ENSG00000066468/ENSG00000115306/ENSG00000196277/ENSG00000144824/ENSG00000090316/ENSG00000136068	23
GO:0035102	PRC1 complex	6/548	21/21916	9.37124e-06	0.00110112	0.000905065	ENSG00000204227/ENSG00000228520/ENSG00000235107/ENSG00000226788/ENSG00000206287/ENSG00000231115	6
GO:0062023	collagen-containing extracellular matrix	28/548	455/21916	1.28416e-05	0.00115749	0.000951394	ENSG00000091583/ENSG00000163815/ENSG00000187720/ENSG00000188107/ENSG00000090006/ENSG00000130635/ENSG00000110799/ENSG00000151914/ENSG00000171502/ENSG00000091136/ENSG00000179399/ENSG00000066468/ENSG00000166833/ENSG00000116962/ENSG00000168477/ENSG00000229341/ENSG00000229353/ENSG00000236221/ENSG00000231608/ENSG00000206258/ENSG00000236236/ENSG00000233323/ENSG00000163520/ENSG00000065320/ENSG00000134871…	28
GO:0034707	chloride channel complex	9/548	59/21916	1.47764e-05	0.00115749	0.000951394	ENSG00000182256/ENSG00000047617/ENSG00000213719/ENSG00000226651/ENSG00000230685/ENSG00000223639/ENSG00000226417/ENSG00000226248/ENSG00000206394	9
GO:0005667	transcription regulator complex	27/548	450/21916	2.85003e-05	0.00149719	0.00123061	ENSG00000020633/ENSG00000106546/ENSG00000124813/ENSG00000145734/ENSG00000274803/ENSG00000273873/ENSG00000160563/ENSG00000140836/ENSG00000106571/ENSG00000153814/ENSG00000129474/ENSG00000048052/ENSG00000071655/ENSG00000196498/ENSG00000172379/ENSG00000143995/ENSG00000186153/ENSG00000196628/ENSG00000078399/ENSG00000159216/ENSG00000170345/ENSG00000167491/ENSG00000179348/ENSG00000124766/ENSG00000100325…	27
GO:0031252	cell leading edge	27/548	451/21916	2.96197e-05	0.00149719	0.00123061	ENSG00000164199/ENSG00000164741/ENSG00000288673/ENSG00000089159/ENSG00000171444/ENSG00000273749/ENSG00000280618/ENSG00000288461/ENSG00000171914/ENSG00000182256/ENSG00000147481/ENSG00000129116/ENSG00000100345/ENSG00000151914/ENSG00000129474/ENSG00000136044/ENSG00000160191/ENSG00000151694/ENSG00000131504/ENSG00000018189/ENSG00000065989/ENSG00000115306/ENSG00000173482/ENSG00000197943/ENSG00000113645…	27
GO:0098862	cluster of actin-based cell projections	15/548	173/21916	3.12988e-05	0.00149719	0.00123061	ENSG00000164199/ENSG00000138792/ENSG00000096433/ENSG00000163803/ENSG00000100345/ENSG00000157483/ENSG00000213719/ENSG00000226651/ENSG00000230685/ENSG00000223639/ENSG00000226417/ENSG00000226248/ENSG00000206394/ENSG00000136068/ENSG00000178209	15
GO:0001726	ruffle	16/548	194/21916	3.1855e-05	0.00149719	0.00123061	ENSG00000164741/ENSG00000288673/ENSG00000273749/ENSG00000280618/ENSG00000288461/ENSG00000171914/ENSG00000147481/ENSG00000129116/ENSG00000100345/ENSG00000136044/ENSG00000160191/ENSG00000151694/ENSG00000131504/ENSG00000065989/ENSG00000197943/ENSG00000113645	16
GO:0032153	cell division site	9/548	77/21916	0.000127419	0.00544427	0.00447491	ENSG00000072864/ENSG00000275911/ENSG00000184640/ENSG00000282302/ENSG00000011426/ENSG00000197321/ENSG00000100345/ENSG00000090316/ENSG00000138180	9
GO:0000803	sex chromosome	6/548	33/21916	0.000148239	0.00580601	0.00477224	ENSG00000204227/ENSG00000228520/ENSG00000235107/ENSG00000226788/ENSG00000206287/ENSG00000231115	6
GO:0000792	heterochromatin	9/548	81/21916	0.000188664	0.00682093	0.00560645	ENSG00000204227/ENSG00000228520/ENSG00000235107/ENSG00000226788/ENSG00000206287/ENSG00000231115/ENSG00000149503/ENSG00000071655/ENSG00000124216	9
GO:0009898	cytoplasmic side of plasma membrane	14/548	184/21916	0.000229232	0.00769563	0.00632541	ENSG00000127946/ENSG00000069966/ENSG00000127191/ENSG00000010810/ENSG00000081237/ENSG00000262418/ENSG00000100345/ENSG00000070182/ENSG00000196581/ENSG00000127955/ENSG00000111218/ENSG00000185838/ENSG00000185989/ENSG00000280477	14
GO:0032587	ruffle membrane	10/548	108/21916	0.000380392	0.0119189	0.00979676	ENSG00000164741/ENSG00000288673/ENSG00000147481/ENSG00000136044/ENSG00000160191/ENSG00000151694/ENSG00000131504/ENSG00000065989/ENSG00000197943/ENSG00000113645	10
GO:0031235	intrinsic component of the cytoplasmic side of the plasma membrane	4/548	15/21916	0.000423762	0.0122491	0.0100681	ENSG00000070182/ENSG00000111218/ENSG00000185989/ENSG00000280477	4
GO:0031519	PcG protein complex	6/548	40/21916	0.000443052	0.0122491	0.0100681	ENSG00000204227/ENSG00000228520/ENSG00000235107/ENSG00000226788/ENSG00000206287/ENSG00000231115	6
GO:0043195	terminal bouton	7/548	59/21916	0.000651251	0.0170049	0.0139771	ENSG00000155093/ENSG00000282185/ENSG00000273749/ENSG00000280618/ENSG00000288461/ENSG00000145920/ENSG00000187714	7
GO:0005912	adherens junction	13/548	185/21916	0.000805442	0.0199241	0.0163766	ENSG00000149654/ENSG00000141556/ENSG00000278759/ENSG00000148498/ENSG00000100345/ENSG00000129474/ENSG00000116106/ENSG00000196581/ENSG00000248905/ENSG00000169862/ENSG00000173482/ENSG00000101384/ENSG00000157483	13
GO:0044295	axonal growth cone	5/548	31/21916	0.000952087	0.0221732	0.0182252	ENSG00000273749/ENSG00000280618/ENSG00000288461/ENSG00000148498/ENSG00000116106	5
GO:0098562	cytoplasmic side of membrane	14/548	213/21916	0.000990718	0.0221732	0.0182252	ENSG00000127946/ENSG00000069966/ENSG00000127191/ENSG00000010810/ENSG00000081237/ENSG00000262418/ENSG00000100345/ENSG00000070182/ENSG00000196581/ENSG00000127955/ENSG00000111218/ENSG00000185838/ENSG00000185989/ENSG00000280477	14
GO:0031256	leading edge membrane	13/548	193/21916	0.0011882	0.0244556	0.0201012	ENSG00000164199/ENSG00000164741/ENSG00000288673/ENSG00000182256/ENSG00000147481/ENSG00000136044/ENSG00000160191/ENSG00000151694/ENSG00000131504/ENSG00000065989/ENSG00000115306/ENSG00000197943/ENSG00000113645	13
GO:0000152	nuclear ubiquitin ligase complex	6/548	48/21916	0.00119676	0.0244556	0.0201012	ENSG00000204227/ENSG00000228520/ENSG00000235107/ENSG00000226788/ENSG00000206287/ENSG00000231115	6
GO:0043204	perikaryon	12/548	172/21916	0.00134346	0.0263093	0.0216249	ENSG00000148219/ENSG00000184985/ENSG00000160191/ENSG00000116106/ENSG00000169862/ENSG00000145920/ENSG00000105426/ENSG00000167281/ENSG00000018189/ENSG00000145730/ENSG00000118160/ENSG00000142920	12
GO:0032059	bleb	3/548	10/21916	0.0016364	0.0295811	0.0243141	ENSG00000081237/ENSG00000262418/ENSG00000011426	3
GO:0070938	contractile ring	3/548	10/21916	0.0016364	0.0295811	0.0243141	ENSG00000011426/ENSG00000100345/ENSG00000090316	3
GO:0044294	dendritic growth cone	3/548	11/21916	0.00220845	0.0370703	0.0304699	ENSG00000273749/ENSG00000280618/ENSG00000288461	3
GO:0090576	RNA polymerase III transcription regulator complex	3/548	11/21916	0.00220845	0.0370703	0.0304699	ENSG00000145734/ENSG00000274803/ENSG00000273873	3
GO:0001725	stress fiber	7/548	74/21916	0.00249278	0.0390535	0.0321	ENSG00000089159/ENSG00000184640/ENSG00000282302/ENSG00000129116/ENSG00000100345/ENSG00000064042/ENSG00000136068	7
GO:0097517	contractile actin filament bundle	7/548	74/21916	0.00249278	0.0390535	0.0321	ENSG00000089159/ENSG00000184640/ENSG00000282302/ENSG00000129116/ENSG00000100345/ENSG00000064042/ENSG00000136068	7
GO:0005901	caveola	8/548	95/21916	0.00263042	0.0398806	0.0327798	ENSG00000164741/ENSG00000288673/ENSG00000169047/ENSG00000163399/ENSG00000073060/ENSG00000142319/ENSG00000276996/ENSG00000156113	8
GO:0031968	organelle outer membrane	14/548	241/21916	0.00312942	0.0459634	0.0377796	ENSG00000156475/ENSG00000152661/ENSG00000165949/ENSG00000275214/ENSG00000151726/ENSG00000096433/ENSG00000146729/ENSG00000116106/ENSG00000184602/ENSG00000110090/ENSG00000135631/ENSG00000070214/ENSG00000067798/ENSG00000178209	14
GO:0019867	outer membrane	14/548	243/21916	0.00336977	0.0479937	0.0394484	ENSG00000156475/ENSG00000152661/ENSG00000165949/ENSG00000275214/ENSG00000151726/ENSG00000096433/ENSG00000146729/ENSG00000116106/ENSG00000184602/ENSG00000110090/ENSG00000135631/ENSG00000070214/ENSG00000067798/ENSG00000178209	14
GO:0031253	cell projection membrane	19/548	381/21916	0.0036063	0.0495244	0.0407065	ENSG00000164199/ENSG00000164741/ENSG00000288673/ENSG00000182256/ENSG00000073060/ENSG00000147481/ENSG00000142765/ENSG00000122507/ENSG00000163803/ENSG00000136044/ENSG00000160191/ENSG00000151694/ENSG00000131504/ENSG00000162576/ENSG00000065989/ENSG00000115306/ENSG00000197943/ENSG00000113645/ENSG00000072840	19
GO:0005845	mRNA cap binding complex	3/548	13/21916	0.00368799	0.0495244	0.0407065	ENSG00000273749/ENSG00000280618/ENSG00000288461	3
