# Supplementary material for: Smoking Suppresses the Therapeutic Potential of Adipose Stem Cells in Crohn’s Disease Patients through Epigenetic Changes
Source: Cells. 2023 Mar 27;12(7):1021. doi: 10.3390/cells12071021 (PMC10093550; doi:10.3390/cells12071021)
Supplement: Supplementary file 1 [file cells-12-01021-s001.zip › Supplementary Excel S2.xlsx]

## Sheet: Biologic Process
ID	Description	GeneRatio	BgRatio	pvalue	p.adjust	qvalue	geneID	Count
GO:0048562	embryonic organ morphogenesis	78/1884	301/20870	4.94002e-18	3.02873e-14	2.49289e-14	ENSG00000133937/ENSG00000105997/ENSG00000119042/ENSG00000052850/ENSG00000105880/ENSG00000066468/ENSG00000179348/ENSG00000120093/ENSG00000108511/ENSG00000198353/ENSG00000128652/ENSG00000163132/ENSG00000143867/ENSG00000115507/ENSG00000007372/ENSG00000117707/ENSG00000137868/ENSG00000114251/ENSG00000115170/ENSG00000135541/ENSG00000184254/ENSG00000101144/ENSG00000174343/ENSG00000171310/ENSG00000164932…	78
GO:0007389	pattern specification process	101/1884	458/20870	1.42549e-17	4.36985e-14	3.59674e-14	ENSG00000163064/ENSG00000180613/ENSG00000133937/ENSG00000105997/ENSG00000119042/ENSG00000052850/ENSG00000066468/ENSG00000120093/ENSG00000108511/ENSG00000198353/ENSG00000128652/ENSG00000143995/ENSG00000163132/ENSG00000118257/ENSG00000143867/ENSG00000115507/ENSG00000007372/ENSG00000164093/ENSG00000114251/ENSG00000115170/ENSG00000135541/ENSG00000169083/ENSG00000182220/ENSG00000131668/ENSG00000101144…	101
GO:0003002	regionalization	83/1884	352/20870	1.90864e-16	3.90062e-13	3.21053e-13	ENSG00000163064/ENSG00000180613/ENSG00000133937/ENSG00000105997/ENSG00000052850/ENSG00000066468/ENSG00000120093/ENSG00000108511/ENSG00000198353/ENSG00000128652/ENSG00000163132/ENSG00000118257/ENSG00000143867/ENSG00000115507/ENSG00000007372/ENSG00000164093/ENSG00000114251/ENSG00000115170/ENSG00000135541/ENSG00000169083/ENSG00000182220/ENSG00000131668/ENSG00000131873/ENSG00000168036/ENSG00000187553…	83
GO:0048568	embryonic organ development	99/1884	467/20870	4.79495e-16	7.34946e-13	6.04921e-13	ENSG00000163064/ENSG00000133937/ENSG00000105997/ENSG00000119042/ENSG00000052850/ENSG00000105880/ENSG00000066468/ENSG00000179348/ENSG00000120093/ENSG00000108511/ENSG00000198353/ENSG00000128652/ENSG00000163132/ENSG00000143867/ENSG00000115507/ENSG00000007372/ENSG00000164093/ENSG00000117707/ENSG00000137868/ENSG00000114251/ENSG00000115170/ENSG00000148926/ENSG00000135541/ENSG00000184254/ENSG00000101144…	99
GO:0048706	embryonic skeletal system development	43/1884	126/20870	4.36966e-15	5.35808e-12	4.41014e-12	ENSG00000133937/ENSG00000105997/ENSG00000119042/ENSG00000052850/ENSG00000066468/ENSG00000120093/ENSG00000108511/ENSG00000198353/ENSG00000128652/ENSG00000143867/ENSG00000114251/ENSG00000101144/ENSG00000171310/ENSG00000108821/ENSG00000168036/ENSG00000115844/ENSG00000173253/ENSG00000141543/ENSG00000106571/ENSG00000083307/ENSG00000105996/ENSG00000106006/ENSG00000122592/ENSG00000078399/ENSG00000120075…	43
GO:0048705	skeletal system morphogenesis	59/1884	224/20870	2.60594e-14	2.66283e-11	2.19173e-11	ENSG00000133937/ENSG00000105997/ENSG00000119042/ENSG00000052850/ENSG00000105880/ENSG00000066468/ENSG00000120093/ENSG00000108511/ENSG00000198353/ENSG00000128652/ENSG00000163132/ENSG00000143867/ENSG00000162551/ENSG00000167522/ENSG00000150347/ENSG00000101144/ENSG00000104331/ENSG00000118523/ENSG00000171310/ENSG00000131873/ENSG00000108821/ENSG00000168036/ENSG00000115844/ENSG00000141543/ENSG00000000938…	59
GO:0048704	embryonic skeletal system morphogenesis	36/1884	97/20870	3.84883e-14	3.37102e-11	2.77463e-11	ENSG00000133937/ENSG00000105997/ENSG00000119042/ENSG00000052850/ENSG00000066468/ENSG00000120093/ENSG00000108511/ENSG00000198353/ENSG00000128652/ENSG00000143867/ENSG00000101144/ENSG00000171310/ENSG00000168036/ENSG00000115844/ENSG00000141543/ENSG00000106571/ENSG00000083307/ENSG00000105996/ENSG00000106006/ENSG00000122592/ENSG00000078399/ENSG00000120075/ENSG00000260027/ENSG00000120068/ENSG00000128710…	36
GO:0072001	renal system development	69/1884	322/20870	8.25839e-12	6.32902e-09	5.2093e-09	ENSG00000003402/ENSG00000187498/ENSG00000066468/ENSG00000143867/ENSG00000117707/ENSG00000137868/ENSG00000078900/ENSG00000114251/ENSG00000075239/ENSG00000135744/ENSG00000135541/ENSG00000184675/ENSG00000154188/ENSG00000091879/ENSG00000117362/ENSG00000178301/ENSG00000167580/ENSG00000150347/ENSG00000204463/ENSG00000153094/ENSG00000101144/ENSG00000104267/ENSG00000121691/ENSG00000272398/ENSG00000125931…	69
GO:0001655	urogenital system development	74/1884	359/20870	1.05256e-11	7.01128e-09	5.77086e-09	ENSG00000003402/ENSG00000187498/ENSG00000066468/ENSG00000179348/ENSG00000143867/ENSG00000117707/ENSG00000137868/ENSG00000078900/ENSG00000114251/ENSG00000075239/ENSG00000135744/ENSG00000135541/ENSG00000184675/ENSG00000154188/ENSG00000091879/ENSG00000117362/ENSG00000178301/ENSG00000167580/ENSG00000169083/ENSG00000150347/ENSG00000204463/ENSG00000153094/ENSG00000101144/ENSG00000104267/ENSG00000121691…	74
GO:0061564	axon development	93/1884	500/20870	1.14358e-11	7.01128e-09	5.77086e-09	ENSG00000175866/ENSG00000143032/ENSG00000176697/ENSG00000162946/ENSG00000105880/ENSG00000106038/ENSG00000066468/ENSG00000167178/ENSG00000106683/ENSG00000162761/ENSG00000118257/ENSG00000007372/ENSG00000012171/ENSG00000114251/ENSG00000097007/ENSG00000164742/ENSG00000181790/ENSG00000011201/ENSG00000004848/ENSG00000101144/ENSG00000174672/ENSG00000187094/ENSG00000163394/ENSG00000143418/ENSG00000044115…	93
GO:0001822	kidney development	67/1884	313/20870	1.74118e-11	9.70471e-09	7.98777e-09	ENSG00000003402/ENSG00000066468/ENSG00000143867/ENSG00000117707/ENSG00000137868/ENSG00000078900/ENSG00000114251/ENSG00000075239/ENSG00000135744/ENSG00000135541/ENSG00000184675/ENSG00000154188/ENSG00000091879/ENSG00000117362/ENSG00000178301/ENSG00000167580/ENSG00000150347/ENSG00000204463/ENSG00000153094/ENSG00000101144/ENSG00000104267/ENSG00000121691/ENSG00000272398/ENSG00000125931/ENSG00000168036…	67
GO:0007409	axonogenesis	84/1884	445/20870	5.29145e-11	2.70349e-08	2.22519e-08	ENSG00000175866/ENSG00000143032/ENSG00000176697/ENSG00000162946/ENSG00000105880/ENSG00000106038/ENSG00000066468/ENSG00000167178/ENSG00000106683/ENSG00000162761/ENSG00000118257/ENSG00000007372/ENSG00000012171/ENSG00000114251/ENSG00000097007/ENSG00000164742/ENSG00000181790/ENSG00000011201/ENSG00000004848/ENSG00000101144/ENSG00000174672/ENSG00000187094/ENSG00000163394/ENSG00000187323/ENSG00000133083…	84
GO:0061448	connective tissue development	58/1884	262/20870	9.87226e-11	4.65591e-08	3.8322e-08	ENSG00000105997/ENSG00000119042/ENSG00000003402/ENSG00000221818/ENSG00000120093/ENSG00000128652/ENSG00000163132/ENSG00000143867/ENSG00000114251/ENSG00000075239/ENSG00000151388/ENSG00000184675/ENSG00000150347/ENSG00000165240/ENSG00000182492/ENSG00000101144/ENSG00000104331/ENSG00000036828/ENSG00000142871/ENSG00000118523/ENSG00000171310/ENSG00000131873/ENSG00000108821/ENSG00000213145/ENSG00000168036…	58
GO:0060562	epithelial tube morphogenesis	73/1884	374/20870	2.0402e-10	8.9346e-08	7.35391e-08	ENSG00000187498/ENSG00000066468/ENSG00000143867/ENSG00000117707/ENSG00000114251/ENSG00000097007/ENSG00000115170/ENSG00000151388/ENSG00000148926/ENSG00000135744/ENSG00000135541/ENSG00000169083/ENSG00000101144/ENSG00000036828/ENSG00000182533/ENSG00000136280/ENSG00000099954/ENSG00000125931/ENSG00000164932/ENSG00000168036/ENSG00000180871/ENSG00000204580/ENSG00000164741/ENSG00000128917/ENSG00000091831…	73
GO:0030900	forebrain development	78/1884	412/20870	2.24014e-10	9.15622e-08	7.53632e-08	ENSG00000180613/ENSG00000133937/ENSG00000119042/ENSG00000134595/ENSG00000162946/ENSG00000105880/ENSG00000066468/ENSG00000179348/ENSG00000159217/ENSG00000162761/ENSG00000163132/ENSG00000118257/ENSG00000115507/ENSG00000007372/ENSG00000164093/ENSG00000117707/ENSG00000110436/ENSG00000164828/ENSG00000114251/ENSG00000141433/ENSG00000184254/ENSG00000004848/ENSG00000137343/ENSG00000165240/ENSG00000085224…	78
GO:0042476	odontogenesis	37/1884	134/20870	3.93828e-10	1.5091e-07	1.24211e-07	ENSG00000198807/ENSG00000066468/ENSG00000163132/ENSG00000143867/ENSG00000164093/ENSG00000148926/ENSG00000162551/ENSG00000167522/ENSG00000153094/ENSG00000242252/ENSG00000101144/ENSG00000104267/ENSG00000108821/ENSG00000119535/ENSG00000044115/ENSG00000168036/ENSG00000115844/ENSG00000158813/ENSG00000177706/ENSG00000070193/ENSG00000054598/ENSG00000106571/ENSG00000113196/ENSG00000164107/ENSG00000116478…	37
GO:0090596	sensory organ morphogenesis	59/1884	284/20870	9.47029e-10	3.41543e-07	2.81118e-07	ENSG00000146555/ENSG00000133937/ENSG00000105880/ENSG00000066468/ENSG00000179348/ENSG00000143995/ENSG00000163132/ENSG00000143867/ENSG00000115507/ENSG00000007372/ENSG00000164093/ENSG00000117707/ENSG00000137868/ENSG00000114251/ENSG00000135541/ENSG00000184254/ENSG00000137936/ENSG00000101144/ENSG00000174343/ENSG00000164932/ENSG00000168036/ENSG00000197406/ENSG00000006377/ENSG00000171587/ENSG00000070193…	59
GO:0021953	central nervous system neuron differentiation	42/1884	170/20870	1.15217e-09	3.92442e-07	3.23012e-07	ENSG00000180613/ENSG00000119042/ENSG00000162946/ENSG00000066468/ENSG00000179348/ENSG00000118257/ENSG00000007372/ENSG00000117707/ENSG00000004848/ENSG00000165240/ENSG00000187323/ENSG00000133083/ENSG00000128917/ENSG00000115844/ENSG00000187240/ENSG00000182580/ENSG00000153266/ENSG00000176165/ENSG00000168505/ENSG00000106571/ENSG00000128710/ENSG00000138002/ENSG00000122641/ENSG00000016082/ENSG00000159556…	42
GO:0048732	gland development	85/1884	486/20870	2.05272e-09	6.62379e-07	5.45192e-07	ENSG00000105997/ENSG00000134595/ENSG00000003402/ENSG00000066468/ENSG00000179348/ENSG00000120093/ENSG00000128652/ENSG00000163132/ENSG00000007372/ENSG00000164093/ENSG00000117707/ENSG00000137868/ENSG00000114251/ENSG00000097007/ENSG00000075239/ENSG00000141433/ENSG00000160224/ENSG00000184254/ENSG00000171388/ENSG00000169083/ENSG00000150347/ENSG00000116539/ENSG00000165240/ENSG00000153094/ENSG00000101144…	85
GO:0009952	anterior/posterior pattern specification	48/1884	214/20870	2.52794e-09	7.7494e-07	6.37839e-07	ENSG00000163064/ENSG00000105997/ENSG00000052850/ENSG00000120093/ENSG00000108511/ENSG00000198353/ENSG00000128652/ENSG00000163132/ENSG00000143867/ENSG00000115507/ENSG00000007372/ENSG00000114251/ENSG00000182220/ENSG00000131668/ENSG00000168036/ENSG00000187553/ENSG00000090932/ENSG00000173253/ENSG00000115109/ENSG00000128610/ENSG00000153266/ENSG00000054598/ENSG00000103241/ENSG00000168505/ENSG00000106571…	48
GO:0072073	kidney epithelium development	37/1884	144/20870	3.50061e-09	1.02201e-06	8.412e-07	ENSG00000066468/ENSG00000143867/ENSG00000075239/ENSG00000135744/ENSG00000135541/ENSG00000178301/ENSG00000101144/ENSG00000121691/ENSG00000272398/ENSG00000125931/ENSG00000168036/ENSG00000180871/ENSG00000119888/ENSG00000054598/ENSG00000168621/ENSG00000106571/ENSG00000147257/ENSG00000275410/ENSG00000260027/ENSG00000128713/ENSG00000177508/ENSG00000273706/ENSG00000081189/ENSG00000075891/ENSG00000125618…	37
GO:0043583	ear development	50/1884	233/20870	5.75718e-09	1.60442e-06	1.32057e-06	ENSG00000133937/ENSG00000105880/ENSG00000117298/ENSG00000066468/ENSG00000179348/ENSG00000163132/ENSG00000143867/ENSG00000115507/ENSG00000117707/ENSG00000137868/ENSG00000114251/ENSG00000135541/ENSG00000184254/ENSG00000057663/ENSG00000153094/ENSG00000136280/ENSG00000099954/ENSG00000174343/ENSG00000164932/ENSG00000170891/ENSG00000204580/ENSG00000006377/ENSG00000104413/ENSG00000112319/ENSG00000070193…	50
GO:0045165	cell fate commitment	58/1884	291/20870	6.59668e-09	1.75845e-06	1.44735e-06	ENSG00000180613/ENSG00000133937/ENSG00000119042/ENSG00000143032/ENSG00000221818/ENSG00000066468/ENSG00000179348/ENSG00000115318/ENSG00000007372/ENSG00000117707/ENSG00000114251/ENSG00000115170/ENSG00000169083/ENSG00000004848/ENSG00000168036/ENSG00000128917/ENSG00000115844/ENSG00000142700/ENSG00000116641/ENSG00000116016/ENSG00000104413/ENSG00000153266/ENSG00000070193/ENSG00000129682/ENSG00000176165…	58
GO:0051216	cartilage development	45/1884	200/20870	7.11786e-09	1.81832e-06	1.49662e-06	ENSG00000105997/ENSG00000119042/ENSG00000120093/ENSG00000128652/ENSG00000163132/ENSG00000143867/ENSG00000114251/ENSG00000151388/ENSG00000165240/ENSG00000182492/ENSG00000101144/ENSG00000104331/ENSG00000142871/ENSG00000118523/ENSG00000171310/ENSG00000131873/ENSG00000108821/ENSG00000168036/ENSG00000170891/ENSG00000115844/ENSG00000156466/ENSG00000106571/ENSG00000113196/ENSG00000164107/ENSG00000149948…	45
GO:0048546	digestive tract morphogenesis	19/1884	47/20870	7.69738e-09	1.8877e-06	1.55374e-06	ENSG00000066468/ENSG00000137868/ENSG00000114251/ENSG00000135541/ENSG00000168036/ENSG00000115109/ENSG00000182580/ENSG00000070193/ENSG00000103241/ENSG00000106571/ENSG00000136630/ENSG00000119919/ENSG00000134853/ENSG00000145423/ENSG00000164690/ENSG00000168779/ENSG00000166949/ENSG00000176887/ENSG00000118526	19
GO:0045664	regulation of neuron differentiation	45/1884	201/20870	8.38095e-09	1.95733e-06	1.61104e-06	ENSG00000134595/ENSG00000176697/ENSG00000179348/ENSG00000128652/ENSG00000162761/ENSG00000143995/ENSG00000007372/ENSG00000117707/ENSG00000078900/ENSG00000113916/ENSG00000151917/ENSG00000101144/ENSG00000162670/ENSG00000115844/ENSG00000135144/ENSG00000114867/ENSG00000104413/ENSG00000149557/ENSG00000128610/ENSG00000153266/ENSG00000176165/ENSG00000106571/ENSG00000170075/ENSG00000105996/ENSG00000177508…	45
GO:0007517	muscle organ development	65/1884	345/20870	8.61979e-09	1.95733e-06	1.61104e-06	ENSG00000133937/ENSG00000178209/ENSG00000052850/ENSG00000003402/ENSG00000066468/ENSG00000164916/ENSG00000186260/ENSG00000163132/ENSG00000135903/ENSG00000117707/ENSG00000137868/ENSG00000114251/ENSG00000181790/ENSG00000167612/ENSG00000150347/ENSG00000182533/ENSG00000168036/ENSG00000108654/ENSG00000128917/ENSG00000198947/ENSG00000142700/ENSG00000006468/ENSG00000167196/ENSG00000186895/ENSG00000022267…	65
GO:0035107	appendage morphogenesis	37/1884	149/20870	9.52192e-09	2.01307e-06	1.65692e-06	ENSG00000163064/ENSG00000052850/ENSG00000105880/ENSG00000117298/ENSG00000066468/ENSG00000163132/ENSG00000143867/ENSG00000114251/ENSG00000085224/ENSG00000153094/ENSG00000101144/ENSG00000104331/ENSG00000171310/ENSG00000168036/ENSG00000006377/ENSG00000187240/ENSG00000070193/ENSG00000106571/ENSG00000147257/ENSG00000083307/ENSG00000164107/ENSG00000116478/ENSG00000078399/ENSG00000128710/ENSG00000106012…	37
GO:0035108	limb morphogenesis	37/1884	149/20870	9.52192e-09	2.01307e-06	1.65692e-06	ENSG00000163064/ENSG00000052850/ENSG00000105880/ENSG00000117298/ENSG00000066468/ENSG00000163132/ENSG00000143867/ENSG00000114251/ENSG00000085224/ENSG00000153094/ENSG00000101144/ENSG00000104331/ENSG00000171310/ENSG00000168036/ENSG00000006377/ENSG00000187240/ENSG00000070193/ENSG00000106571/ENSG00000147257/ENSG00000083307/ENSG00000164107/ENSG00000116478/ENSG00000078399/ENSG00000128710/ENSG00000106012…	37
GO:0001763	morphogenesis of a branching structure	48/1884	224/20870	1.21094e-08	2.26655e-06	1.86556e-06	ENSG00000187498/ENSG00000066468/ENSG00000117707/ENSG00000114251/ENSG00000097007/ENSG00000115170/ENSG00000148926/ENSG00000135744/ENSG00000169083/ENSG00000101144/ENSG00000036828/ENSG00000182533/ENSG00000125931/ENSG00000168036/ENSG00000204580/ENSG00000128917/ENSG00000115844/ENSG00000091831/ENSG00000070193/ENSG00000103241/ENSG00000168505/ENSG00000168621/ENSG00000106571/ENSG00000147257/ENSG00000083307…	48
GO:0048736	appendage development	42/1884	183/20870	1.21174e-08	2.26655e-06	1.86556e-06	ENSG00000163064/ENSG00000052850/ENSG00000105880/ENSG00000117298/ENSG00000066468/ENSG00000163132/ENSG00000143867/ENSG00000164093/ENSG00000114251/ENSG00000085224/ENSG00000153094/ENSG00000101144/ENSG00000104331/ENSG00000171310/ENSG00000168036/ENSG00000006377/ENSG00000187240/ENSG00000070193/ENSG00000106571/ENSG00000147257/ENSG00000083307/ENSG00000164107/ENSG00000116478/ENSG00000078399/ENSG00000128710…	42
GO:0060173	limb development	42/1884	183/20870	1.21174e-08	2.26655e-06	1.86556e-06	ENSG00000163064/ENSG00000052850/ENSG00000105880/ENSG00000117298/ENSG00000066468/ENSG00000163132/ENSG00000143867/ENSG00000164093/ENSG00000114251/ENSG00000085224/ENSG00000153094/ENSG00000101144/ENSG00000104331/ENSG00000171310/ENSG00000168036/ENSG00000006377/ENSG00000187240/ENSG00000070193/ENSG00000106571/ENSG00000147257/ENSG00000083307/ENSG00000164107/ENSG00000116478/ENSG00000078399/ENSG00000128710…	42
GO:0009880	embryonic pattern specification	23/1884	68/20870	1.21997e-08	2.26655e-06	1.86556e-06	ENSG00000119042/ENSG00000066468/ENSG00000143995/ENSG00000118257/ENSG00000114251/ENSG00000101144/ENSG00000125931/ENSG00000168036/ENSG00000090776/ENSG00000115109/ENSG00000070193/ENSG00000175879/ENSG00000273706/ENSG00000134138/ENSG00000106511/ENSG00000099250/ENSG00000179598/ENSG00000164690/ENSG00000166949/ENSG00000137834/ENSG00000164458/ENSG00000125084/ENSG00000184937	23
GO:0072006	nephron development	37/1884	151/20870	1.39888e-08	2.43646e-06	2.00541e-06	ENSG00000003402/ENSG00000143867/ENSG00000075239/ENSG00000135744/ENSG00000135541/ENSG00000154188/ENSG00000091879/ENSG00000178301/ENSG00000101144/ENSG00000272398/ENSG00000125931/ENSG00000168036/ENSG00000054598/ENSG00000168621/ENSG00000106571/ENSG00000147257/ENSG00000275410/ENSG00000260027/ENSG00000128713/ENSG00000177508/ENSG00000273706/ENSG00000081189/ENSG00000115204/ENSG00000075891/ENSG00000125618…	37
GO:0051960	regulation of nervous system development	82/1884	482/20870	1.44826e-08	2.43646e-06	2.00541e-06	ENSG00000180613/ENSG00000175866/ENSG00000176697/ENSG00000257923/ENSG00000162946/ENSG00000164850/ENSG00000120093/ENSG00000167178/ENSG00000106683/ENSG00000007372/ENSG00000012171/ENSG00000078900/ENSG00000114251/ENSG00000141433/ENSG00000181790/ENSG00000188157/ENSG00000286237/ENSG00000198908/ENSG00000101144/ENSG00000143418/ENSG00000044115/ENSG00000168036/ENSG00000187323/ENSG00000100697/ENSG00000090932…	82
GO:0021510	spinal cord development	29/1884	102/20870	1.47038e-08	2.43646e-06	2.00541e-06	ENSG00000180613/ENSG00000179348/ENSG00000115318/ENSG00000007372/ENSG00000117707/ENSG00000187323/ENSG00000128917/ENSG00000187240/ENSG00000168621/ENSG00000106571/ENSG00000120068/ENSG00000128710/ENSG00000138002/ENSG00000016082/ENSG00000159556/ENSG00000138136/ENSG00000273706/ENSG00000184634/ENSG00000165462/ENSG00000105894/ENSG00000111783/ENSG00000185008/ENSG00000142186/ENSG00000164690/ENSG00000176887…	29
GO:0061326	renal tubule development	29/1884	102/20870	1.47038e-08	2.43646e-06	2.00541e-06	ENSG00000187498/ENSG00000143867/ENSG00000075239/ENSG00000135744/ENSG00000135541/ENSG00000178301/ENSG00000272398/ENSG00000125931/ENSG00000168036/ENSG00000168621/ENSG00000106571/ENSG00000147257/ENSG00000275410/ENSG00000260027/ENSG00000128713/ENSG00000177508/ENSG00000273706/ENSG00000081189/ENSG00000075891/ENSG00000125618/ENSG00000185630/ENSG00000198914/ENSG00000103449/ENSG00000164690/ENSG00000100625…	29
GO:0016331	morphogenesis of embryonic epithelium	38/1884	161/20870	2.66526e-08	4.30019e-06	3.53941e-06	ENSG00000066468/ENSG00000143867/ENSG00000114251/ENSG00000097007/ENSG00000148926/ENSG00000184254/ENSG00000169083/ENSG00000101144/ENSG00000099954/ENSG00000164932/ENSG00000168036/ENSG00000164741/ENSG00000115109/ENSG00000070193/ENSG00000168621/ENSG00000083307/ENSG00000158055/ENSG00000113196/ENSG00000138002/ENSG00000177508/ENSG00000184916/ENSG00000081479/ENSG00000184634/ENSG00000075891/ENSG00000125618…	38
GO:0072080	nephron tubule development	28/1884	99/20870	2.94112e-08	4.62359e-06	3.8056e-06	ENSG00000143867/ENSG00000075239/ENSG00000135744/ENSG00000135541/ENSG00000178301/ENSG00000272398/ENSG00000125931/ENSG00000168036/ENSG00000168621/ENSG00000106571/ENSG00000147257/ENSG00000275410/ENSG00000260027/ENSG00000128713/ENSG00000177508/ENSG00000273706/ENSG00000081189/ENSG00000075891/ENSG00000125618/ENSG00000185630/ENSG00000198914/ENSG00000103449/ENSG00000164690/ENSG00000100625/ENSG00000118526…	28
GO:0010975	regulation of neuron projection development	79/1884	467/20870	3.41528e-08	5.23477e-06	4.30865e-06	ENSG00000175866/ENSG00000176697/ENSG00000003402/ENSG00000257923/ENSG00000162946/ENSG00000162676/ENSG00000167178/ENSG00000106683/ENSG00000012171/ENSG00000114251/ENSG00000143322/ENSG00000141433/ENSG00000135744/ENSG00000189292/ENSG00000004777/ENSG00000006740/ENSG00000286237/ENSG00000198908/ENSG00000101144/ENSG00000174672/ENSG00000143418/ENSG00000018236/ENSG00000164796/ENSG00000187323/ENSG00000113657…	79
GO:0050767	regulation of neurogenesis	70/1884	398/20870	4.29554e-08	6.4234e-06	5.28699e-06	ENSG00000180613/ENSG00000175866/ENSG00000176697/ENSG00000257923/ENSG00000162946/ENSG00000164850/ENSG00000120093/ENSG00000167178/ENSG00000106683/ENSG00000007372/ENSG00000012171/ENSG00000078900/ENSG00000114251/ENSG00000141433/ENSG00000286237/ENSG00000198908/ENSG00000101144/ENSG00000143418/ENSG00000044115/ENSG00000168036/ENSG00000187323/ENSG00000100697/ENSG00000090932/ENSG00000128917/ENSG00000115844…	70
GO:0001823	mesonephros development	28/1884	101/20870	4.72767e-08	6.90127e-06	5.68031e-06	ENSG00000066468/ENSG00000143867/ENSG00000135744/ENSG00000101144/ENSG00000121691/ENSG00000125931/ENSG00000168036/ENSG00000119888/ENSG00000070193/ENSG00000054598/ENSG00000168621/ENSG00000106571/ENSG00000147257/ENSG00000260027/ENSG00000128713/ENSG00000273706/ENSG00000075891/ENSG00000125618/ENSG00000185630/ENSG00000185008/ENSG00000103449/ENSG00000164690/ENSG00000100625/ENSG00000166949/ENSG00000137834…	28
GO:0048754	branching morphogenesis of an epithelial tube	40/1884	178/20870	4.97264e-08	7.09006e-06	5.8357e-06	ENSG00000187498/ENSG00000066468/ENSG00000114251/ENSG00000097007/ENSG00000115170/ENSG00000135744/ENSG00000169083/ENSG00000101144/ENSG00000036828/ENSG00000182533/ENSG00000125931/ENSG00000168036/ENSG00000204580/ENSG00000128917/ENSG00000091831/ENSG00000070193/ENSG00000103241/ENSG00000168505/ENSG00000168621/ENSG00000106571/ENSG00000147257/ENSG00000260027/ENSG00000128713/ENSG00000133703/ENSG00000273706…	40
GO:0001657	ureteric bud development	27/1884	96/20870	5.87844e-08	8.19108e-06	6.74193e-06	ENSG00000066468/ENSG00000143867/ENSG00000135744/ENSG00000101144/ENSG00000121691/ENSG00000125931/ENSG00000168036/ENSG00000119888/ENSG00000054598/ENSG00000168621/ENSG00000106571/ENSG00000147257/ENSG00000260027/ENSG00000128713/ENSG00000273706/ENSG00000075891/ENSG00000125618/ENSG00000185630/ENSG00000185008/ENSG00000103449/ENSG00000164690/ENSG00000100625/ENSG00000166949/ENSG00000137834/ENSG00000118526…	27
GO:0072163	mesonephric epithelium development	27/1884	97/20870	7.45109e-08	9.93101e-06	8.17404e-06	ENSG00000066468/ENSG00000143867/ENSG00000135744/ENSG00000101144/ENSG00000121691/ENSG00000125931/ENSG00000168036/ENSG00000119888/ENSG00000054598/ENSG00000168621/ENSG00000106571/ENSG00000147257/ENSG00000260027/ENSG00000128713/ENSG00000273706/ENSG00000075891/ENSG00000125618/ENSG00000185630/ENSG00000185008/ENSG00000103449/ENSG00000164690/ENSG00000100625/ENSG00000166949/ENSG00000137834/ENSG00000118526…	27
GO:0072164	mesonephric tubule development	27/1884	97/20870	7.45109e-08	9.93101e-06	8.17404e-06	ENSG00000066468/ENSG00000143867/ENSG00000135744/ENSG00000101144/ENSG00000121691/ENSG00000125931/ENSG00000168036/ENSG00000119888/ENSG00000054598/ENSG00000168621/ENSG00000106571/ENSG00000147257/ENSG00000260027/ENSG00000128713/ENSG00000273706/ENSG00000075891/ENSG00000125618/ENSG00000185630/ENSG00000185008/ENSG00000103449/ENSG00000164690/ENSG00000100625/ENSG00000166949/ENSG00000137834/ENSG00000118526…	27
GO:0061351	neural precursor cell proliferation	35/1884	148/20870	8.84873e-08	1.15429e-05	9.50074e-06	ENSG00000162946/ENSG00000066468/ENSG00000179348/ENSG00000114353/ENSG00000159217/ENSG00000007372/ENSG00000117707/ENSG00000147100/ENSG00000114251/ENSG00000141433/ENSG00000004848/ENSG00000044115/ENSG00000168036/ENSG00000128917/ENSG00000142700/ENSG00000116641/ENSG00000129682/ENSG00000176165/ENSG00000168505/ENSG00000106571/ENSG00000170075/ENSG00000273706/ENSG00000081479/ENSG00000112333/ENSG00000171540…	35
GO:0061138	morphogenesis of a branching epithelium	44/1884	210/20870	9.64361e-08	1.23177e-05	1.01385e-05	ENSG00000187498/ENSG00000066468/ENSG00000117707/ENSG00000114251/ENSG00000097007/ENSG00000115170/ENSG00000148926/ENSG00000135744/ENSG00000169083/ENSG00000101144/ENSG00000036828/ENSG00000182533/ENSG00000125931/ENSG00000168036/ENSG00000204580/ENSG00000128917/ENSG00000091831/ENSG00000070193/ENSG00000103241/ENSG00000168505/ENSG00000168621/ENSG00000106571/ENSG00000147257/ENSG00000083307/ENSG00000260027…	44
GO:0061333	renal tubule morphogenesis	24/1884	81/20870	1.07008e-07	1.33892e-05	1.10204e-05	ENSG00000187498/ENSG00000143867/ENSG00000135744/ENSG00000135541/ENSG00000125931/ENSG00000168036/ENSG00000168621/ENSG00000106571/ENSG00000147257/ENSG00000260027/ENSG00000128713/ENSG00000177508/ENSG00000273706/ENSG00000081189/ENSG00000075891/ENSG00000125618/ENSG00000185630/ENSG00000103449/ENSG00000164690/ENSG00000100625/ENSG00000118526/ENSG00000126562/ENSG00000125084/ENSG00000184937	24
GO:0042471	ear morphogenesis	31/1884	124/20870	1.24995e-07	1.53269e-05	1.26153e-05	ENSG00000133937/ENSG00000105880/ENSG00000066468/ENSG00000179348/ENSG00000163132/ENSG00000143867/ENSG00000115507/ENSG00000117707/ENSG00000114251/ENSG00000184254/ENSG00000174343/ENSG00000164932/ENSG00000006377/ENSG00000070193/ENSG00000176165/ENSG00000168505/ENSG00000158055/ENSG00000188620/ENSG00000105996/ENSG00000117013/ENSG00000109705/ENSG00000075891/ENSG00000125618/ENSG00000169071/ENSG00000100625…	31
GO:0048645	animal organ formation	21/1884	65/20870	1.28466e-07	1.54437e-05	1.27114e-05	ENSG00000105997/ENSG00000066468/ENSG00000114251/ENSG00000169083/ENSG00000101144/ENSG00000168036/ENSG00000070193/ENSG00000168621/ENSG00000106571/ENSG00000164107/ENSG00000016082/ENSG00000081479/ENSG00000081189/ENSG00000109705/ENSG00000225950/ENSG00000075891/ENSG00000125618/ENSG00000185008/ENSG00000164690/ENSG00000137573/ENSG00000184937	21
GO:0031589	cell-substrate adhesion	69/1884	402/20870	1.41418e-07	1.66738e-05	1.37239e-05	ENSG00000168477/ENSG00000162946/ENSG00000128652/ENSG00000145113/ENSG00000138964/ENSG00000141556/ENSG00000097007/ENSG00000184009/ENSG00000077522/ENSG00000151388/ENSG00000163638/ENSG00000154188/ENSG00000091879/ENSG00000047648/ENSG00000102606/ENSG00000153094/ENSG00000113916/ENSG00000147044/ENSG00000091986/ENSG00000151882/ENSG00000142871/ENSG00000118523/ENSG00000135404/ENSG00000153283/ENSG00000105810…	69
GO:0048557	embryonic digestive tract morphogenesis	10/1884	16/20870	1.69067e-07	1.95575e-05	1.60974e-05	ENSG00000066468/ENSG00000070193/ENSG00000103241/ENSG00000106571/ENSG00000136630/ENSG00000134853/ENSG00000164690/ENSG00000168779/ENSG00000176887/ENSG00000118526	10
GO:0045665	negative regulation of neuron differentiation	22/1884	72/20870	1.97392e-07	2.24112e-05	1.84463e-05	ENSG00000134595/ENSG00000162761/ENSG00000143995/ENSG00000007372/ENSG00000078900/ENSG00000101144/ENSG00000115844/ENSG00000135144/ENSG00000153266/ENSG00000176165/ENSG00000106571/ENSG00000170075/ENSG00000105996/ENSG00000177508/ENSG00000016082/ENSG00000159556/ENSG00000138136/ENSG00000112333/ENSG00000185630/ENSG00000151615/ENSG00000164690/ENSG00000138083	22
GO:0042733	embryonic digit morphogenesis	19/1884	56/20870	2.12041e-07	2.32889e-05	1.91686e-05	ENSG00000052850/ENSG00000117298/ENSG00000163132/ENSG00000143867/ENSG00000114251/ENSG00000153094/ENSG00000104331/ENSG00000171310/ENSG00000168036/ENSG00000106571/ENSG00000083307/ENSG00000164107/ENSG00000116478/ENSG00000105983/ENSG00000169071/ENSG00000103449/ENSG00000145423/ENSG00000164690/ENSG00000122691	19
GO:0030326	embryonic limb morphogenesis	31/1884	127/20870	2.23038e-07	2.32889e-05	1.91686e-05	ENSG00000163064/ENSG00000052850/ENSG00000105880/ENSG00000117298/ENSG00000163132/ENSG00000143867/ENSG00000114251/ENSG00000153094/ENSG00000101144/ENSG00000104331/ENSG00000171310/ENSG00000168036/ENSG00000006377/ENSG00000187240/ENSG00000106571/ENSG00000147257/ENSG00000083307/ENSG00000164107/ENSG00000116478/ENSG00000078399/ENSG00000128710/ENSG00000105983/ENSG00000185630/ENSG00000169071/ENSG00000124813…	31
GO:0035113	embryonic appendage morphogenesis	31/1884	127/20870	2.23038e-07	2.32889e-05	1.91686e-05	ENSG00000163064/ENSG00000052850/ENSG00000105880/ENSG00000117298/ENSG00000163132/ENSG00000143867/ENSG00000114251/ENSG00000153094/ENSG00000101144/ENSG00000104331/ENSG00000171310/ENSG00000168036/ENSG00000006377/ENSG00000187240/ENSG00000106571/ENSG00000147257/ENSG00000083307/ENSG00000164107/ENSG00000116478/ENSG00000078399/ENSG00000128710/ENSG00000105983/ENSG00000185630/ENSG00000169071/ENSG00000124813…	31
GO:0021515	cell differentiation in spinal cord	18/1884	51/20870	2.23294e-07	2.32889e-05	1.91686e-05	ENSG00000180613/ENSG00000179348/ENSG00000128917/ENSG00000187240/ENSG00000106571/ENSG00000128710/ENSG00000138002/ENSG00000016082/ENSG00000159556/ENSG00000138136/ENSG00000273706/ENSG00000165462/ENSG00000142186/ENSG00000164690/ENSG00000124766/ENSG00000204852/ENSG00000125084/ENSG00000126970	18
GO:0021517	ventral spinal cord development	17/1884	46/20870	2.24114e-07	2.32889e-05	1.91686e-05	ENSG00000179348/ENSG00000007372/ENSG00000128917/ENSG00000187240/ENSG00000106571/ENSG00000128710/ENSG00000138002/ENSG00000016082/ENSG00000159556/ENSG00000138136/ENSG00000273706/ENSG00000165462/ENSG00000142186/ENSG00000164690/ENSG00000124766/ENSG00000204852/ENSG00000126970	17
GO:0007411	axon guidance	47/1884	239/20870	2.63913e-07	2.69675e-05	2.21965e-05	ENSG00000176697/ENSG00000105880/ENSG00000106038/ENSG00000162761/ENSG00000118257/ENSG00000007372/ENSG00000012171/ENSG00000114251/ENSG00000011201/ENSG00000004848/ENSG00000101144/ENSG00000187323/ENSG00000171587/ENSG00000143590/ENSG00000090776/ENSG00000182580/ENSG00000006468/ENSG00000149557/ENSG00000128610/ENSG00000153266/ENSG00000176165/ENSG00000168505/ENSG00000168621/ENSG00000146013/ENSG00000106571…	47
GO:0097485	neuron projection guidance	47/1884	240/20870	2.99927e-07	3.01452e-05	2.48119e-05	ENSG00000176697/ENSG00000105880/ENSG00000106038/ENSG00000162761/ENSG00000118257/ENSG00000007372/ENSG00000012171/ENSG00000114251/ENSG00000011201/ENSG00000004848/ENSG00000101144/ENSG00000187323/ENSG00000171587/ENSG00000143590/ENSG00000090776/ENSG00000182580/ENSG00000006468/ENSG00000149557/ENSG00000128610/ENSG00000153266/ENSG00000176165/ENSG00000168505/ENSG00000168621/ENSG00000146013/ENSG00000106571…	47
GO:0021536	diencephalon development	23/1884	80/20870	3.58359e-07	3.49024e-05	2.87276e-05	ENSG00000134595/ENSG00000179348/ENSG00000163132/ENSG00000118257/ENSG00000115507/ENSG00000007372/ENSG00000164093/ENSG00000114251/ENSG00000141433/ENSG00000004848/ENSG00000070193/ENSG00000168505/ENSG00000016082/ENSG00000169297/ENSG00000153234/ENSG00000099250/ENSG00000171540/ENSG00000165186/ENSG00000105894/ENSG00000103449/ENSG00000164690/ENSG00000138083/ENSG00000125084	23
GO:0035148	tube formation	36/1884	163/20870	3.58645e-07	3.49024e-05	2.87276e-05	ENSG00000066468/ENSG00000143867/ENSG00000117707/ENSG00000114251/ENSG00000097007/ENSG00000148926/ENSG00000153094/ENSG00000101144/ENSG00000099954/ENSG00000164932/ENSG00000168036/ENSG00000164741/ENSG00000158813/ENSG00000070193/ENSG00000168621/ENSG00000083307/ENSG00000158055/ENSG00000113196/ENSG00000138002/ENSG00000177508/ENSG00000119185/ENSG00000081479/ENSG00000184634/ENSG00000075891/ENSG00000125618…	36
GO:0072009	nephron epithelium development	29/1884	117/20870	3.83346e-07	3.67233e-05	3.02263e-05	ENSG00000143867/ENSG00000075239/ENSG00000135744/ENSG00000135541/ENSG00000178301/ENSG00000272398/ENSG00000125931/ENSG00000168036/ENSG00000054598/ENSG00000168621/ENSG00000106571/ENSG00000147257/ENSG00000275410/ENSG00000260027/ENSG00000128713/ENSG00000177508/ENSG00000273706/ENSG00000081189/ENSG00000075891/ENSG00000125618/ENSG00000185630/ENSG00000198914/ENSG00000103449/ENSG00000164690/ENSG00000100625…	29
GO:0021872	forebrain generation of neurons	18/1884	53/20870	4.33853e-07	4.06125e-05	3.34274e-05	ENSG00000119042/ENSG00000162946/ENSG00000066468/ENSG00000179348/ENSG00000118257/ENSG00000007372/ENSG00000117707/ENSG00000165240/ENSG00000115844/ENSG00000153266/ENSG00000176165/ENSG00000168505/ENSG00000106571/ENSG00000122641/ENSG00000106852/ENSG00000112333/ENSG00000099250/ENSG00000171540	18
GO:0032970	regulation of actin filament-based process	70/1884	422/20870	4.37192e-07	4.06125e-05	3.34274e-05	ENSG00000175866/ENSG00000145362/ENSG00000106683/ENSG00000117707/ENSG00000097007/ENSG00000143322/ENSG00000184009/ENSG00000077522/ENSG00000115091/ENSG00000075340/ENSG00000006740/ENSG00000047648/ENSG00000111348/ENSG00000163399/ENSG00000128298/ENSG00000130303/ENSG00000188277/ENSG00000042493/ENSG00000077549/ENSG00000182533/ENSG00000118523/ENSG00000163171/ENSG00000172725/ENSG00000103647/ENSG00000055163…	70
GO:0001656	metanephros development	25/1884	93/20870	4.64599e-07	4.10374e-05	3.37772e-05	ENSG00000143867/ENSG00000075239/ENSG00000117362/ENSG00000167580/ENSG00000101144/ENSG00000125931/ENSG00000168036/ENSG00000180871/ENSG00000070193/ENSG00000156466/ENSG00000168621/ENSG00000106571/ENSG00000147257/ENSG00000177508/ENSG00000273706/ENSG00000075891/ENSG00000125618/ENSG00000134853/ENSG00000198914/ENSG00000185008/ENSG00000103449/ENSG00000164690/ENSG00000100625/ENSG00000118526/ENSG00000184937	25
GO:0042475	odontogenesis of dentin-containing tooth	25/1884	93/20870	4.64599e-07	4.10374e-05	3.37772e-05	ENSG00000163132/ENSG00000148926/ENSG00000167522/ENSG00000153094/ENSG00000101144/ENSG00000104267/ENSG00000119535/ENSG00000044115/ENSG00000168036/ENSG00000115844/ENSG00000158813/ENSG00000177706/ENSG00000070193/ENSG00000054598/ENSG00000106571/ENSG00000113196/ENSG00000164107/ENSG00000116478/ENSG00000184916/ENSG00000119919/ENSG00000134853/ENSG00000124813/ENSG00000164690/ENSG00000140090/ENSG00000103056	25
GO:0060021	roof of mouth development	25/1884	93/20870	4.64599e-07	4.10374e-05	3.37772e-05	ENSG00000119042/ENSG00000052850/ENSG00000105880/ENSG00000115318/ENSG00000163132/ENSG00000143867/ENSG00000114251/ENSG00000150347/ENSG00000006377/ENSG00000182580/ENSG00000106571/ENSG00000164107/ENSG00000138002/ENSG00000122641/ENSG00000184916/ENSG00000106511/ENSG00000178860/ENSG00000134853/ENSG00000164690/ENSG00000176887/ENSG00000118526/ENSG00000119699/ENSG00000122691/ENSG00000148704/ENSG00000173714	25
GO:0060688	regulation of morphogenesis of a branching structure	20/1884	64/20870	4.6854e-07	4.10374e-05	3.37772e-05	ENSG00000066468/ENSG00000114251/ENSG00000097007/ENSG00000135744/ENSG00000169083/ENSG00000101144/ENSG00000182533/ENSG00000168036/ENSG00000091831/ENSG00000070193/ENSG00000168621/ENSG00000260027/ENSG00000273706/ENSG00000075891/ENSG00000125618/ENSG00000164690/ENSG00000168779/ENSG00000100625/ENSG00000137573/ENSG00000232810	20
GO:0048762	mesenchymal cell differentiation	48/1884	252/20870	5.29878e-07	4.57561e-05	3.7661e-05	ENSG00000133937/ENSG00000066468/ENSG00000115318/ENSG00000163132/ENSG00000118257/ENSG00000143867/ENSG00000164093/ENSG00000012171/ENSG00000114251/ENSG00000115170/ENSG00000184675/ENSG00000101144/ENSG00000108821/ENSG00000168036/ENSG00000187553/ENSG00000108654/ENSG00000090776/ENSG00000115109/ENSG00000145743/ENSG00000070193/ENSG00000054598/ENSG00000168505/ENSG00000168621/ENSG00000164107/ENSG00000149948…	48
GO:0060993	kidney morphogenesis	26/1884	100/20870	5.60196e-07	4.77023e-05	3.92629e-05	ENSG00000143867/ENSG00000135744/ENSG00000135541/ENSG00000101144/ENSG00000125931/ENSG00000168036/ENSG00000070193/ENSG00000168621/ENSG00000106571/ENSG00000147257/ENSG00000275410/ENSG00000260027/ENSG00000128713/ENSG00000177508/ENSG00000273706/ENSG00000075891/ENSG00000125618/ENSG00000185630/ENSG00000103449/ENSG00000164690/ENSG00000100625/ENSG00000124766/ENSG00000118526/ENSG00000126562/ENSG00000125084…	26
GO:0072028	nephron morphogenesis	23/1884	82/20870	5.82622e-07	4.89323e-05	4.02753e-05	ENSG00000143867/ENSG00000135744/ENSG00000135541/ENSG00000101144/ENSG00000125931/ENSG00000168036/ENSG00000168621/ENSG00000106571/ENSG00000147257/ENSG00000260027/ENSG00000128713/ENSG00000177508/ENSG00000273706/ENSG00000075891/ENSG00000125618/ENSG00000185630/ENSG00000103449/ENSG00000164690/ENSG00000100625/ENSG00000118526/ENSG00000126562/ENSG00000125084/ENSG00000184937	23
GO:0021879	forebrain neuron differentiation	16/1884	44/20870	6.56317e-07	5.43767e-05	4.47565e-05	ENSG00000119042/ENSG00000162946/ENSG00000066468/ENSG00000179348/ENSG00000118257/ENSG00000007372/ENSG00000117707/ENSG00000165240/ENSG00000115844/ENSG00000153266/ENSG00000176165/ENSG00000168505/ENSG00000122641/ENSG00000106852/ENSG00000099250/ENSG00000171540	16
GO:0021522	spinal cord motor neuron differentiation	13/1884	30/20870	6.98958e-07	5.71374e-05	4.70288e-05	ENSG00000187240/ENSG00000106571/ENSG00000128710/ENSG00000138002/ENSG00000016082/ENSG00000159556/ENSG00000138136/ENSG00000165462/ENSG00000142186/ENSG00000164690/ENSG00000124766/ENSG00000204852/ENSG00000126970	13
GO:0060485	mesenchyme development	55/1884	308/20870	7.16005e-07	5.73546e-05	4.72075e-05	ENSG00000133937/ENSG00000066468/ENSG00000115318/ENSG00000163132/ENSG00000118257/ENSG00000143867/ENSG00000164093/ENSG00000012171/ENSG00000114251/ENSG00000163017/ENSG00000115170/ENSG00000184675/ENSG00000101144/ENSG00000108821/ENSG00000168036/ENSG00000187553/ENSG00000108654/ENSG00000090932/ENSG00000090776/ENSG00000115109/ENSG00000145743/ENSG00000070193/ENSG00000054598/ENSG00000103241/ENSG00000168505…	55
GO:0072078	nephron tubule morphogenesis	22/1884	77/20870	7.20323e-07	5.73546e-05	4.72075e-05	ENSG00000143867/ENSG00000135744/ENSG00000135541/ENSG00000125931/ENSG00000168036/ENSG00000168621/ENSG00000106571/ENSG00000147257/ENSG00000260027/ENSG00000128713/ENSG00000177508/ENSG00000273706/ENSG00000075891/ENSG00000125618/ENSG00000185630/ENSG00000103449/ENSG00000164690/ENSG00000100625/ENSG00000118526/ENSG00000126562/ENSG00000125084/ENSG00000184937	22
GO:2000177	regulation of neural precursor cell proliferation	24/1884	89/20870	7.3616e-07	5.78641e-05	4.76269e-05	ENSG00000162946/ENSG00000179348/ENSG00000114353/ENSG00000007372/ENSG00000117707/ENSG00000147100/ENSG00000114251/ENSG00000141433/ENSG00000044115/ENSG00000168036/ENSG00000128917/ENSG00000142700/ENSG00000176165/ENSG00000106571/ENSG00000170075/ENSG00000273706/ENSG00000081479/ENSG00000112333/ENSG00000171540/ENSG00000105894/ENSG00000164690/ENSG00000138083/ENSG00000206557/ENSG00000148704	24
GO:0055123	digestive system development	34/1884	154/20870	7.56621e-07	5.87195e-05	4.8331e-05	ENSG00000052850/ENSG00000066468/ENSG00000137868/ENSG00000114251/ENSG00000135541/ENSG00000131668/ENSG00000166250/ENSG00000168036/ENSG00000140465/ENSG00000146648/ENSG00000115109/ENSG00000182580/ENSG00000070193/ENSG00000103241/ENSG00000176678/ENSG00000106571/ENSG00000136630/ENSG00000138002/ENSG00000167244/ENSG00000119919/ENSG00000109705/ENSG00000134853/ENSG00000057657/ENSG00000101213/ENSG00000103449…	34
GO:0043010	camera-type eye development	60/1884	351/20870	1.04289e-06	7.99247e-05	6.57846e-05	ENSG00000146555/ENSG00000187498/ENSG00000102878/ENSG00000143995/ENSG00000007372/ENSG00000164093/ENSG00000117707/ENSG00000137868/ENSG00000114251/ENSG00000135541/ENSG00000184254/ENSG00000137936/ENSG00000125864/ENSG00000101144/ENSG00000100053/ENSG00000127377/ENSG00000168036/ENSG00000140465/ENSG00000138061/ENSG00000197406/ENSG00000128917/ENSG00000115844/ENSG00000171587/ENSG00000070193/ENSG00000054598…	60
GO:0060537	muscle tissue development	70/1884	432/20870	1.05932e-06	8.01814e-05	6.59959e-05	ENSG00000178209/ENSG00000003402/ENSG00000066468/ENSG00000143995/ENSG00000186260/ENSG00000163132/ENSG00000143867/ENSG00000117707/ENSG00000137868/ENSG00000078900/ENSG00000114251/ENSG00000077522/ENSG00000115170/ENSG00000163638/ENSG00000135744/ENSG00000167612/ENSG00000057663/ENSG00000101144/ENSG00000116161/ENSG00000182533/ENSG00000100211/ENSG00000159176/ENSG00000168036/ENSG00000108654/ENSG00000128917…	70
GO:0072088	nephron epithelium morphogenesis	22/1884	79/20870	1.16521e-06	8.65549e-05	7.12418e-05	ENSG00000143867/ENSG00000135744/ENSG00000135541/ENSG00000125931/ENSG00000168036/ENSG00000168621/ENSG00000106571/ENSG00000147257/ENSG00000260027/ENSG00000128713/ENSG00000177508/ENSG00000273706/ENSG00000075891/ENSG00000125618/ENSG00000185630/ENSG00000103449/ENSG00000164690/ENSG00000100625/ENSG00000118526/ENSG00000126562/ENSG00000125084/ENSG00000184937	22
GO:0003206	cardiac chamber morphogenesis	29/1884	123/20870	1.17176e-06	8.65549e-05	7.12418e-05	ENSG00000109472/ENSG00000066468/ENSG00000118257/ENSG00000117707/ENSG00000114251/ENSG00000115170/ENSG00000112414/ENSG00000101144/ENSG00000182533/ENSG00000142871/ENSG00000128917/ENSG00000115641/ENSG00000054598/ENSG00000103241/ENSG00000083307/ENSG00000113196/ENSG00000164107/ENSG00000016082/ENSG00000081479/ENSG00000081189/ENSG00000099250/ENSG00000185008/ENSG00000145423/ENSG00000168779/ENSG00000137834…	29
GO:0048565	digestive tract development	32/1884	144/20870	1.36118e-06	9.93501e-05	8.17733e-05	ENSG00000052850/ENSG00000066468/ENSG00000137868/ENSG00000114251/ENSG00000135541/ENSG00000166250/ENSG00000168036/ENSG00000140465/ENSG00000146648/ENSG00000115109/ENSG00000182580/ENSG00000070193/ENSG00000103241/ENSG00000176678/ENSG00000106571/ENSG00000136630/ENSG00000138002/ENSG00000119919/ENSG00000109705/ENSG00000134853/ENSG00000057657/ENSG00000101213/ENSG00000103449/ENSG00000145423/ENSG00000164690…	32
GO:0016358	dendrite development	49/1884	268/20870	1.41075e-06	0.000101757	8.37542e-05	ENSG00000146555/ENSG00000175866/ENSG00000257923/ENSG00000162946/ENSG00000159217/ENSG00000144711/ENSG00000068366/ENSG00000004777/ENSG00000006740/ENSG00000286237/ENSG00000198908/ENSG00000101144/ENSG00000107864/ENSG00000164796/ENSG00000187323/ENSG00000146038/ENSG00000133083/ENSG00000171587/ENSG00000146425/ENSG00000182580/ENSG00000153266/ENSG00000126500/ENSG00000102081/ENSG00000158301/ENSG00000125968…	49
GO:0048839	inner ear development	40/1884	201/20870	1.4601e-06	0.000103681	8.5338e-05	ENSG00000105880/ENSG00000066468/ENSG00000179348/ENSG00000115507/ENSG00000117707/ENSG00000114251/ENSG00000135541/ENSG00000184254/ENSG00000057663/ENSG00000136280/ENSG00000099954/ENSG00000174343/ENSG00000164932/ENSG00000170891/ENSG00000006377/ENSG00000104413/ENSG00000112319/ENSG00000070193/ENSG00000176165/ENSG00000168505/ENSG00000106571/ENSG00000158055/ENSG00000188620/ENSG00000184916/ENSG00000082482…	40
GO:1905330	regulation of morphogenesis of an epithelium	22/1884	80/20870	1.47125e-06	0.000103681	8.5338e-05	ENSG00000114251/ENSG00000097007/ENSG00000151388/ENSG00000135744/ENSG00000169083/ENSG00000101144/ENSG00000182533/ENSG00000168036/ENSG00000091831/ENSG00000070193/ENSG00000114861/ENSG00000168621/ENSG00000260027/ENSG00000179528/ENSG00000273706/ENSG00000075891/ENSG00000125618/ENSG00000158286/ENSG00000164690/ENSG00000100625/ENSG00000137573/ENSG00000232810	22
GO:2000027	regulation of animal organ morphogenesis	31/1884	138/20870	1.55025e-06	0.000108006	8.88981e-05	ENSG00000198807/ENSG00000163132/ENSG00000114251/ENSG00000097007/ENSG00000135744/ENSG00000135541/ENSG00000135299/ENSG00000169083/ENSG00000101144/ENSG00000182533/ENSG00000164932/ENSG00000168036/ENSG00000070193/ENSG00000168621/ENSG00000147257/ENSG00000183098/ENSG00000158055/ENSG00000260027/ENSG00000273706/ENSG00000184634/ENSG00000075891/ENSG00000125618/ENSG00000185008/ENSG00000169071/ENSG00000124813…	31
GO:0003205	cardiac chamber development	35/1884	166/20870	1.63681e-06	0.000112756	9.28074e-05	ENSG00000145362/ENSG00000109472/ENSG00000066468/ENSG00000118257/ENSG00000117707/ENSG00000137868/ENSG00000114251/ENSG00000115170/ENSG00000112414/ENSG00000101144/ENSG00000182533/ENSG00000142871/ENSG00000128917/ENSG00000115641/ENSG00000054598/ENSG00000103241/ENSG00000083307/ENSG00000113196/ENSG00000164107/ENSG00000016082/ENSG00000082482/ENSG00000081479/ENSG00000081189/ENSG00000099250/ENSG00000125618…	35
GO:0048863	stem cell differentiation	42/1884	217/20870	1.72757e-06	0.000117686	9.68649e-05	ENSG00000133937/ENSG00000066468/ENSG00000163132/ENSG00000118257/ENSG00000143867/ENSG00000164093/ENSG00000012171/ENSG00000097007/ENSG00000115170/ENSG00000101144/ENSG00000168036/ENSG00000187553/ENSG00000090776/ENSG00000119888/ENSG00000091831/ENSG00000145743/ENSG00000054598/ENSG00000168505/ENSG00000168621/ENSG00000164107/ENSG00000149948/ENSG00000122592/ENSG00000016082/ENSG00000081189/ENSG00000153944…	42
GO:0072175	epithelial tube formation	32/1884	146/20870	1.871e-06	0.000126056	0.000103755	ENSG00000066468/ENSG00000143867/ENSG00000117707/ENSG00000114251/ENSG00000097007/ENSG00000148926/ENSG00000101144/ENSG00000099954/ENSG00000164932/ENSG00000168036/ENSG00000164741/ENSG00000070193/ENSG00000168621/ENSG00000083307/ENSG00000158055/ENSG00000113196/ENSG00000138002/ENSG00000177508/ENSG00000081479/ENSG00000184634/ENSG00000075891/ENSG00000125618/ENSG00000196576/ENSG00000142875/ENSG00000182175…	32
GO:1902903	regulation of supramolecular fiber organization	68/1884	423/20870	2.00091e-06	0.000133343	0.000109752	ENSG00000175866/ENSG00000204388/ENSG00000106683/ENSG00000204220/ENSG00000117707/ENSG00000141556/ENSG00000097007/ENSG00000184009/ENSG00000077522/ENSG00000115091/ENSG00000075340/ENSG00000047648/ENSG00000102606/ENSG00000128298/ENSG00000166780/ENSG00000188277/ENSG00000042493/ENSG00000077549/ENSG00000182533/ENSG00000118523/ENSG00000163171/ENSG00000172725/ENSG00000103647/ENSG00000055163/ENSG00000164741…	68
GO:0001503	ossification	70/1884	440/20870	2.08234e-06	0.000137278	0.000112991	ENSG00000119042/ENSG00000105880/ENSG00000066468/ENSG00000185885/ENSG00000143867/ENSG00000164828/ENSG00000114251/ENSG00000115170/ENSG00000162551/ENSG00000183684/ENSG00000177119/ENSG00000071553/ENSG00000242252/ENSG00000101144/ENSG00000104331/ENSG00000036828/ENSG00000121691/ENSG00000142871/ENSG00000118523/ENSG00000105810/ENSG00000131873/ENSG00000125931/ENSG00000108821/ENSG00000164932/ENSG00000168036…	70
GO:0001764	neuron migration	34/1884	161/20870	2.20667e-06	0.000143927	0.000118463	ENSG00000119042/ENSG00000143032/ENSG00000162946/ENSG00000106038/ENSG00000179348/ENSG00000118257/ENSG00000007372/ENSG00000004848/ENSG00000187094/ENSG00000163394/ENSG00000111860/ENSG00000168036/ENSG00000187323/ENSG00000146038/ENSG00000133083/ENSG00000128610/ENSG00000153266/ENSG00000129682/ENSG00000176165/ENSG00000146013/ENSG00000273706/ENSG00000106852/ENSG00000131711/ENSG00000072518/ENSG00000081189…	34
GO:0031346	positive regulation of cell projection organization	62/1884	376/20870	2.39737e-06	0.000154719	0.000127346	ENSG00000175866/ENSG00000176697/ENSG00000003402/ENSG00000257923/ENSG00000162946/ENSG00000167178/ENSG00000106683/ENSG00000114251/ENSG00000143322/ENSG00000115091/ENSG00000141433/ENSG00000188157/ENSG00000135744/ENSG00000189292/ENSG00000102606/ENSG00000286237/ENSG00000165240/ENSG00000198908/ENSG00000101144/ENSG00000188277/ENSG00000163171/ENSG00000018236/ENSG00000172725/ENSG00000113657/ENSG00000171587…	62
GO:0090287	regulation of cellular response to growth factor stimulus	55/1884	320/20870	2.43852e-06	0.000155735	0.000128182	ENSG00000003402/ENSG00000163132/ENSG00000131634/ENSG00000114251/ENSG00000097007/ENSG00000151388/ENSG00000135744/ENSG00000171388/ENSG00000147044/ENSG00000182533/ENSG00000142871/ENSG00000135404/ENSG00000171310/ENSG00000176194/ENSG00000125931/ENSG00000168036/ENSG00000055163/ENSG00000050165/ENSG00000133059/ENSG00000070193/ENSG00000147257/ENSG00000204389/ENSG00000144730/ENSG00000161638/ENSG00000081479…	55
GO:0009953	dorsal/ventral pattern formation	23/1884	89/20870	2.77426e-06	0.000172443	0.000141935	ENSG00000163064/ENSG00000180613/ENSG00000133937/ENSG00000007372/ENSG00000115170/ENSG00000168036/ENSG00000128917/ENSG00000187240/ENSG00000176165/ENSG00000106571/ENSG00000120370/ENSG00000105996/ENSG00000128713/ENSG00000138002/ENSG00000273706/ENSG00000158747/ENSG00000142875/ENSG00000111783/ENSG00000164690/ENSG00000138083/ENSG00000137834/ENSG00000204852/ENSG00000116035	23
GO:0007548	sex differentiation	50/1884	282/20870	2.78123e-06	0.000172443	0.000141935	ENSG00000013619/ENSG00000143867/ENSG00000137868/ENSG00000114251/ENSG00000141433/ENSG00000169083/ENSG00000150347/ENSG00000085224/ENSG00000153094/ENSG00000102384/ENSG00000092758/ENSG00000044115/ENSG00000168036/ENSG00000126733/ENSG00000173253/ENSG00000142700/ENSG00000205981/ENSG00000091831/ENSG00000187741/ENSG00000221829/ENSG00000070193/ENSG00000054598/ENSG00000183770/ENSG00000148935/ENSG00000078399…	50
GO:0050808	synapse organization	74/1884	477/20870	2.78452e-06	0.000172443	0.000141935	ENSG00000146555/ENSG00000175866/ENSG00000176697/ENSG00000165985/ENSG00000187498/ENSG00000162946/ENSG00000162761/ENSG00000146938/ENSG00000118257/ENSG00000196230/ENSG00000114251/ENSG00000097007/ENSG00000184009/ENSG00000075340/ENSG00000181790/ENSG00000188157/ENSG00000163697/ENSG00000004777/ENSG00000006740/ENSG00000286237/ENSG00000198908/ENSG00000182389/ENSG00000113100/ENSG00000149970/ENSG00000175029…	74
GO:0014706	striated muscle tissue development	66/1884	412/20870	3.1804e-06	0.00019499	0.000160493	ENSG00000178209/ENSG00000003402/ENSG00000066468/ENSG00000143995/ENSG00000186260/ENSG00000163132/ENSG00000117707/ENSG00000078900/ENSG00000114251/ENSG00000077522/ENSG00000115170/ENSG00000163638/ENSG00000135744/ENSG00000167612/ENSG00000057663/ENSG00000101144/ENSG00000116161/ENSG00000182533/ENSG00000100211/ENSG00000168036/ENSG00000108654/ENSG00000128917/ENSG00000198947/ENSG00000142700/ENSG00000167196…	66
GO:0001658	branching involved in ureteric bud morphogenesis	18/1884	60/20870	3.36204e-06	0.000204086	0.00016798	ENSG00000135744/ENSG00000125931/ENSG00000168036/ENSG00000168621/ENSG00000106571/ENSG00000147257/ENSG00000260027/ENSG00000128713/ENSG00000273706/ENSG00000075891/ENSG00000125618/ENSG00000185630/ENSG00000103449/ENSG00000164690/ENSG00000100625/ENSG00000118526/ENSG00000125084/ENSG00000184937	18
GO:0001654	eye development	65/1884	405/20870	3.53306e-06	0.000212364	0.000174793	ENSG00000146555/ENSG00000187498/ENSG00000102878/ENSG00000143995/ENSG00000007372/ENSG00000164093/ENSG00000117707/ENSG00000137868/ENSG00000114251/ENSG00000135541/ENSG00000184254/ENSG00000137936/ENSG00000125864/ENSG00000101144/ENSG00000100053/ENSG00000127377/ENSG00000168036/ENSG00000140465/ENSG00000138061/ENSG00000197406/ENSG00000128917/ENSG00000115844/ENSG00000171587/ENSG00000070193/ENSG00000054598…	65
GO:0048880	sensory system development	67/1884	422/20870	3.6721e-06	0.000218579	0.000179909	ENSG00000146555/ENSG00000187498/ENSG00000102878/ENSG00000143995/ENSG00000007372/ENSG00000164093/ENSG00000117707/ENSG00000137868/ENSG00000114251/ENSG00000135541/ENSG00000184254/ENSG00000137936/ENSG00000125864/ENSG00000101144/ENSG00000100053/ENSG00000127377/ENSG00000168036/ENSG00000140465/ENSG00000138061/ENSG00000197406/ENSG00000128917/ENSG00000115844/ENSG00000171587/ENSG00000070193/ENSG00000054598…	67
GO:0032956	regulation of actin cytoskeleton organization	62/1884	381/20870	3.73037e-06	0.000219912	0.000181006	ENSG00000175866/ENSG00000106683/ENSG00000117707/ENSG00000097007/ENSG00000143322/ENSG00000184009/ENSG00000077522/ENSG00000115091/ENSG00000075340/ENSG00000006740/ENSG00000047648/ENSG00000111348/ENSG00000128298/ENSG00000130303/ENSG00000188277/ENSG00000042493/ENSG00000077549/ENSG00000182533/ENSG00000118523/ENSG00000163171/ENSG00000172725/ENSG00000103647/ENSG00000055163/ENSG00000164741/ENSG00000162643…	62
GO:0048048	embryonic eye morphogenesis	13/1884	34/20870	3.83671e-06	0.000224028	0.000184393	ENSG00000007372/ENSG00000117707/ENSG00000137868/ENSG00000114251/ENSG00000184254/ENSG00000101144/ENSG00000138002/ENSG00000197614/ENSG00000075891/ENSG00000138083/ENSG00000176887/ENSG00000122691/ENSG00000116035	13
GO:0046660	female sex differentiation	27/1884	117/20870	4.18151e-06	0.000241857	0.000199068	ENSG00000137868/ENSG00000114251/ENSG00000141433/ENSG00000150347/ENSG00000092758/ENSG00000044115/ENSG00000126733/ENSG00000091831/ENSG00000187741/ENSG00000221829/ENSG00000070193/ENSG00000054598/ENSG00000183770/ENSG00000148935/ENSG00000122641/ENSG00000163083/ENSG00000174697/ENSG00000138039/ENSG00000273706/ENSG00000081479/ENSG00000185551/ENSG00000176046/ENSG00000134853/ENSG00000185008/ENSG00000142168…	27
GO:0008589	regulation of smoothened signaling pathway	22/1884	85/20870	4.4152e-06	0.000252987	0.000208229	ENSG00000066468/ENSG00000131873/ENSG00000044115/ENSG00000146038/ENSG00000187240/ENSG00000145743/ENSG00000070193/ENSG00000106571/ENSG00000120370/ENSG00000147257/ENSG00000170075/ENSG00000138002/ENSG00000166813/ENSG00000102858/ENSG00000142875/ENSG00000111783/ENSG00000124813/ENSG00000164690/ENSG00000168779/ENSG00000204852/ENSG00000185347/ENSG00000152977	22
GO:0048793	pronephros development	7/1884	10/20870	4.53942e-06	0.000257696	0.000212105	ENSG00000143867/ENSG00000135541/ENSG00000275410/ENSG00000273706/ENSG00000075891/ENSG00000125618/ENSG00000058262	7
GO:0051962	positive regulation of nervous system development	52/1884	303/20870	4.74623e-06	0.000266965	0.000219734	ENSG00000180613/ENSG00000175866/ENSG00000176697/ENSG00000257923/ENSG00000162946/ENSG00000164850/ENSG00000167178/ENSG00000106683/ENSG00000007372/ENSG00000078900/ENSG00000181790/ENSG00000188157/ENSG00000286237/ENSG00000198908/ENSG00000168036/ENSG00000100697/ENSG00000142700/ENSG00000171587/ENSG00000146648/ENSG00000182580/ENSG00000176165/ENSG00000203879/ENSG00000106571/ENSG00000158301/ENSG00000116478…	52
GO:0150063	visual system development	65/1884	409/20870	4.93475e-06	0.000275045	0.000226385	ENSG00000146555/ENSG00000187498/ENSG00000102878/ENSG00000143995/ENSG00000007372/ENSG00000164093/ENSG00000117707/ENSG00000137868/ENSG00000114251/ENSG00000135541/ENSG00000184254/ENSG00000137936/ENSG00000125864/ENSG00000101144/ENSG00000100053/ENSG00000127377/ENSG00000168036/ENSG00000140465/ENSG00000138061/ENSG00000197406/ENSG00000128917/ENSG00000115844/ENSG00000171587/ENSG00000070193/ENSG00000054598…	65
GO:0042472	inner ear morphogenesis	25/1884	105/20870	5.19014e-06	0.000286673	0.000235956	ENSG00000105880/ENSG00000066468/ENSG00000179348/ENSG00000115507/ENSG00000117707/ENSG00000114251/ENSG00000184254/ENSG00000174343/ENSG00000164932/ENSG00000006377/ENSG00000070193/ENSG00000176165/ENSG00000168505/ENSG00000158055/ENSG00000188620/ENSG00000117013/ENSG00000075891/ENSG00000125618/ENSG00000169071/ENSG00000100625/ENSG00000204385/ENSG00000142168/ENSG00000006611/ENSG00000125084/ENSG00000152977	25
GO:0048593	camera-type eye morphogenesis	30/1884	139/20870	5.39087e-06	0.000295102	0.000242893	ENSG00000146555/ENSG00000143995/ENSG00000007372/ENSG00000164093/ENSG00000117707/ENSG00000137868/ENSG00000114251/ENSG00000135541/ENSG00000184254/ENSG00000137936/ENSG00000101144/ENSG00000168036/ENSG00000197406/ENSG00000171587/ENSG00000106571/ENSG00000205581/ENSG00000138002/ENSG00000188501/ENSG00000273706/ENSG00000168389/ENSG00000129535/ENSG00000075891/ENSG00000105894/ENSG00000138083/ENSG00000176887…	30
GO:0048536	spleen development	13/1884	35/20870	5.6005e-06	0.000303864	0.000250105	ENSG00000164093/ENSG00000097007/ENSG00000131668/ENSG00000153094/ENSG00000070193/ENSG00000077150/ENSG00000119919/ENSG00000109705/ENSG00000169856/ENSG00000185630/ENSG00000129465/ENSG00000118526/ENSG00000056972	13
GO:0072171	mesonephric tubule morphogenesis	19/1884	68/20870	5.82994e-06	0.000313539	0.000258068	ENSG00000143867/ENSG00000135744/ENSG00000125931/ENSG00000168036/ENSG00000168621/ENSG00000106571/ENSG00000147257/ENSG00000260027/ENSG00000128713/ENSG00000273706/ENSG00000075891/ENSG00000125618/ENSG00000185630/ENSG00000103449/ENSG00000164690/ENSG00000100625/ENSG00000118526/ENSG00000125084/ENSG00000184937	19
GO:0035270	endocrine system development	29/1884	133/20870	6.21746e-06	0.000331472	0.000272829	ENSG00000105997/ENSG00000134595/ENSG00000179348/ENSG00000120093/ENSG00000128652/ENSG00000163132/ENSG00000007372/ENSG00000164093/ENSG00000137868/ENSG00000114251/ENSG00000141433/ENSG00000150347/ENSG00000105810/ENSG00000050165/ENSG00000070193/ENSG00000016082/ENSG00000169297/ENSG00000169856/ENSG00000171540/ENSG00000125618/ENSG00000185630/ENSG00000134853/ENSG00000103449/ENSG00000164690/ENSG00000138083…	29
GO:0048596	embryonic camera-type eye morphogenesis	11/1884	26/20870	6.76873e-06	0.000355796	0.00029285	ENSG00000007372/ENSG00000117707/ENSG00000137868/ENSG00000114251/ENSG00000184254/ENSG00000101144/ENSG00000138002/ENSG00000075891/ENSG00000138083/ENSG00000176887/ENSG00000122691	11
GO:0061458	reproductive system development	68/1884	438/20870	6.78978e-06	0.000355796	0.00029285	ENSG00000066468/ENSG00000179348/ENSG00000013619/ENSG00000143867/ENSG00000137868/ENSG00000114251/ENSG00000141433/ENSG00000148926/ENSG00000169083/ENSG00000150347/ENSG00000116539/ENSG00000085224/ENSG00000153094/ENSG00000101144/ENSG00000142871/ENSG00000125931/ENSG00000092758/ENSG00000213145/ENSG00000044115/ENSG00000168036/ENSG00000205981/ENSG00000116016/ENSG00000091831/ENSG00000187741/ENSG00000221829…	68
GO:0034329	cell junction assembly	70/1884	457/20870	8.00684e-06	0.000414409	0.000341093	ENSG00000146555/ENSG00000178209/ENSG00000145362/ENSG00000176697/ENSG00000146938/ENSG00000141556/ENSG00000114251/ENSG00000097007/ENSG00000184009/ENSG00000077522/ENSG00000075340/ENSG00000181790/ENSG00000188157/ENSG00000135744/ENSG00000047648/ENSG00000102606/ENSG00000286237/ENSG00000198908/ENSG00000145526/ENSG00000113100/ENSG00000013297/ENSG00000106404/ENSG00000103647/ENSG00000044115/ENSG00000168036…	70
GO:0010092	specification of animal organ identity	13/1884	36/20870	8.04349e-06	0.000414409	0.000341093	ENSG00000066468/ENSG00000114251/ENSG00000169083/ENSG00000168036/ENSG00000070193/ENSG00000168621/ENSG00000106571/ENSG00000016082/ENSG00000081479/ENSG00000081189/ENSG00000075891/ENSG00000125618/ENSG00000185008	13
GO:0031998	regulation of fatty acid beta-oxidation	10/1884	22/20870	8.21563e-06	0.00041975	0.000345489	ENSG00000173208/ENSG00000076555/ENSG00000110090/ENSG00000139160/ENSG00000163586/ENSG00000169047/ENSG00000102910/ENSG00000168389/ENSG00000175701/ENSG00000122691	10
GO:0010810	regulation of cell-substrate adhesion	43/1884	238/20870	8.29441e-06	0.000420273	0.000345919	ENSG00000162946/ENSG00000141556/ENSG00000097007/ENSG00000184009/ENSG00000091879/ENSG00000047648/ENSG00000102606/ENSG00000113916/ENSG00000147044/ENSG00000091986/ENSG00000151882/ENSG00000142871/ENSG00000105810/ENSG00000108821/ENSG00000103647/ENSG00000204580/ENSG00000164741/ENSG00000112679/ENSG00000198759/ENSG00000164318/ENSG00000115109/ENSG00000103241/ENSG00000122592/ENSG00000119185/ENSG00000107104…	43
GO:0001838	embryonic epithelial tube formation	29/1884	135/20870	8.4583e-06	0.000424619	0.000349496	ENSG00000143867/ENSG00000114251/ENSG00000097007/ENSG00000148926/ENSG00000101144/ENSG00000099954/ENSG00000164932/ENSG00000168036/ENSG00000164741/ENSG00000168621/ENSG00000083307/ENSG00000158055/ENSG00000113196/ENSG00000138002/ENSG00000177508/ENSG00000081479/ENSG00000184634/ENSG00000075891/ENSG00000125618/ENSG00000196576/ENSG00000142875/ENSG00000182175/ENSG00000145423/ENSG00000100625/ENSG00000176887…	29
GO:1902904	negative regulation of supramolecular fiber organization	35/1884	178/20870	8.5187e-06	0.000424619	0.000349496	ENSG00000204220/ENSG00000141556/ENSG00000075340/ENSG00000047648/ENSG00000102606/ENSG00000166780/ENSG00000042493/ENSG00000077549/ENSG00000182533/ENSG00000172725/ENSG00000103647/ENSG00000164741/ENSG00000162643/ENSG00000125746/ENSG00000129682/ENSG00000148180/ENSG00000107104/ENSG00000140854/ENSG00000131711/ENSG00000105976/ENSG00000165175/ENSG00000179820/ENSG00000113068/ENSG00000070087/ENSG00000144824…	35
GO:0021915	neural tube development	33/1884	164/20870	9.18793e-06	0.000454284	0.000373913	ENSG00000163064/ENSG00000133937/ENSG00000007372/ENSG00000117707/ENSG00000114251/ENSG00000097007/ENSG00000148926/ENSG00000182220/ENSG00000101144/ENSG00000099954/ENSG00000164932/ENSG00000164741/ENSG00000146618/ENSG00000168505/ENSG00000106571/ENSG00000120370/ENSG00000083307/ENSG00000158055/ENSG00000138002/ENSG00000081479/ENSG00000184634/ENSG00000075891/ENSG00000196576/ENSG00000142875/ENSG00000182175…	33
GO:0048608	reproductive structure development	67/1884	435/20870	1.03331e-05	0.000506816	0.000417151	ENSG00000066468/ENSG00000179348/ENSG00000013619/ENSG00000143867/ENSG00000137868/ENSG00000114251/ENSG00000141433/ENSG00000148926/ENSG00000169083/ENSG00000150347/ENSG00000116539/ENSG00000085224/ENSG00000153094/ENSG00000101144/ENSG00000142871/ENSG00000125931/ENSG00000092758/ENSG00000213145/ENSG00000044115/ENSG00000168036/ENSG00000205981/ENSG00000116016/ENSG00000091831/ENSG00000187741/ENSG00000221829…	67
GO:0002062	chondrocyte differentiation	25/1884	109/20870	1.05001e-05	0.000510924	0.000420532	ENSG00000143867/ENSG00000151388/ENSG00000104331/ENSG00000118523/ENSG00000171310/ENSG00000131873/ENSG00000168036/ENSG00000170891/ENSG00000156466/ENSG00000106571/ENSG00000149948/ENSG00000081189/ENSG00000150051/ENSG00000109705/ENSG00000159216/ENSG00000124813/ENSG00000006747/ENSG00000145423/ENSG00000168779/ENSG00000166949/ENSG00000103056/ENSG00000134532/ENSG00000137573/ENSG00000182704/ENSG00000169884	25
GO:0045666	positive regulation of neuron differentiation	23/1884	96/20870	1.09337e-05	0.000527829	0.000434447	ENSG00000179348/ENSG00000128652/ENSG00000117707/ENSG00000113916/ENSG00000151917/ENSG00000101144/ENSG00000162670/ENSG00000115844/ENSG00000114867/ENSG00000149557/ENSG00000128610/ENSG00000153266/ENSG00000176165/ENSG00000177508/ENSG00000131711/ENSG00000081189/ENSG00000158747/ENSG00000183036/ENSG00000176887/ENSG00000196628/ENSG00000188730/ENSG00000126970/ENSG00000148516	23
GO:0007405	neuroblast proliferation	17/1884	59/20870	1.14103e-05	0.000546533	0.000449842	ENSG00000162946/ENSG00000066468/ENSG00000007372/ENSG00000044115/ENSG00000168036/ENSG00000142700/ENSG00000116641/ENSG00000129682/ENSG00000176165/ENSG00000106571/ENSG00000171540/ENSG00000196576/ENSG00000105894/ENSG00000164690/ENSG00000138083/ENSG00000134532/ENSG00000148704	17
GO:0048701	embryonic cranial skeleton morphogenesis	15/1884	48/20870	1.2582e-05	0.000597985	0.000492191	ENSG00000066468/ENSG00000171310/ENSG00000115844/ENSG00000141543/ENSG00000106571/ENSG00000083307/ENSG00000105996/ENSG00000273706/ENSG00000184634/ENSG00000134853/ENSG00000124813/ENSG00000100625/ENSG00000166949/ENSG00000119699/ENSG00000122691	15
GO:0045667	regulation of osteoblast differentiation	31/1884	152/20870	1.27802e-05	0.000602736	0.000496101	ENSG00000066468/ENSG00000185885/ENSG00000115170/ENSG00000071553/ENSG00000101144/ENSG00000142871/ENSG00000105810/ENSG00000125931/ENSG00000164932/ENSG00000168036/ENSG00000108654/ENSG00000162643/ENSG00000106571/ENSG00000164107/ENSG00000068024/ENSG00000105996/ENSG00000081189/ENSG00000207713/ENSG00000188554/ENSG00000132170/ENSG00000124813/ENSG00000145423/ENSG00000166949/ENSG00000137834/ENSG00000176887…	31
GO:1902692	regulation of neuroblast proliferation	12/1884	33/20870	1.65395e-05	0.000774073	0.000637125	ENSG00000162946/ENSG00000007372/ENSG00000044115/ENSG00000168036/ENSG00000142700/ENSG00000176165/ENSG00000106571/ENSG00000171540/ENSG00000105894/ENSG00000164690/ENSG00000138083/ENSG00000148704	12
GO:0060675	ureteric bud morphogenesis	18/1884	67/20870	1.84522e-05	0.000857049	0.000705422	ENSG00000135744/ENSG00000125931/ENSG00000168036/ENSG00000168621/ENSG00000106571/ENSG00000147257/ENSG00000260027/ENSG00000128713/ENSG00000273706/ENSG00000075891/ENSG00000125618/ENSG00000185630/ENSG00000103449/ENSG00000164690/ENSG00000100625/ENSG00000118526/ENSG00000125084/ENSG00000184937	18
GO:0048592	eye morphogenesis	33/1884	170/20870	2.00734e-05	0.000925338	0.000761629	ENSG00000146555/ENSG00000143995/ENSG00000007372/ENSG00000164093/ENSG00000117707/ENSG00000137868/ENSG00000114251/ENSG00000135541/ENSG00000184254/ENSG00000137936/ENSG00000101144/ENSG00000168036/ENSG00000197406/ENSG00000171587/ENSG00000106571/ENSG00000205581/ENSG00000138002/ENSG00000188501/ENSG00000273706/ENSG00000197614/ENSG00000168389/ENSG00000129535/ENSG00000075891/ENSG00000057657/ENSG00000105894…	33
GO:0003231	cardiac ventricle development	27/1884	127/20870	2.07959e-05	0.000948178	0.000780429	ENSG00000109472/ENSG00000066468/ENSG00000117707/ENSG00000137868/ENSG00000114251/ENSG00000115170/ENSG00000142871/ENSG00000128917/ENSG00000054598/ENSG00000103241/ENSG00000083307/ENSG00000113196/ENSG00000164107/ENSG00000016082/ENSG00000082482/ENSG00000081479/ENSG00000081189/ENSG00000125618/ENSG00000057657/ENSG00000185008/ENSG00000103449/ENSG00000145423/ENSG00000137834/ENSG00000176887/ENSG00000124766…	27
GO:0014033	neural crest cell differentiation	22/1884	93/20870	2.08782e-05	0.000948178	0.000780429	ENSG00000133937/ENSG00000118257/ENSG00000164093/ENSG00000012171/ENSG00000115170/ENSG00000101144/ENSG00000187553/ENSG00000090776/ENSG00000145743/ENSG00000054598/ENSG00000168505/ENSG00000168621/ENSG00000164107/ENSG00000016082/ENSG00000081189/ENSG00000099250/ENSG00000170381/ENSG00000082684/ENSG00000143434/ENSG00000164690/ENSG00000176887/ENSG00000122691	22
GO:0021871	forebrain regionalization	10/1884	24/20870	2.10491e-05	0.000948911	0.000781032	ENSG00000180613/ENSG00000007372/ENSG00000142700/ENSG00000128610/ENSG00000153266/ENSG00000106571/ENSG00000273706/ENSG00000164690/ENSG00000138083/ENSG00000125084	10
GO:0001649	osteoblast differentiation	44/1884	255/20870	2.15958e-05	0.000966453	0.00079547	ENSG00000119042/ENSG00000105880/ENSG00000066468/ENSG00000185885/ENSG00000115170/ENSG00000162551/ENSG00000183684/ENSG00000071553/ENSG00000242252/ENSG00000101144/ENSG00000121691/ENSG00000142871/ENSG00000105810/ENSG00000125931/ENSG00000108821/ENSG00000164932/ENSG00000168036/ENSG00000108654/ENSG00000162643/ENSG00000115641/ENSG00000106571/ENSG00000164107/ENSG00000068024/ENSG00000105996/ENSG00000167244…	44
GO:0010976	positive regulation of neuron projection development	33/1884	171/20870	2.2752e-05	0.00101082	0.000831984	ENSG00000175866/ENSG00000176697/ENSG00000003402/ENSG00000162946/ENSG00000114251/ENSG00000143322/ENSG00000141433/ENSG00000135744/ENSG00000189292/ENSG00000286237/ENSG00000198908/ENSG00000101144/ENSG00000018236/ENSG00000113657/ENSG00000146425/ENSG00000182511/ENSG00000149557/ENSG00000158301/ENSG00000030582/ENSG00000140854/ENSG00000033122/ENSG00000072518/ENSG00000207713/ENSG00000124507/ENSG00000077264…	33
GO:0001755	neural crest cell migration	16/1884	56/20870	2.30776e-05	0.00101791	0.00083782	ENSG00000118257/ENSG00000164093/ENSG00000012171/ENSG00000115170/ENSG00000101144/ENSG00000090776/ENSG00000168505/ENSG00000168621/ENSG00000164107/ENSG00000016082/ENSG00000099250/ENSG00000170381/ENSG00000082684/ENSG00000143434/ENSG00000164690/ENSG00000122691	16
GO:0060601	lateral sprouting from an epithelium	7/1884	12/20870	2.54492e-05	0.00110659	0.000910813	ENSG00000066468/ENSG00000114251/ENSG00000169083/ENSG00000101144/ENSG00000070193/ENSG00000164690/ENSG00000137573	7
GO:0060900	embryonic camera-type eye formation	7/1884	12/20870	2.54492e-05	0.00110659	0.000910813	ENSG00000117707/ENSG00000137868/ENSG00000114251/ENSG00000184254/ENSG00000075891/ENSG00000176887/ENSG00000122691	7
GO:0060324	face development	14/1884	45/20870	2.58202e-05	0.00111481	0.000917583	ENSG00000198807/ENSG00000134595/ENSG00000105880/ENSG00000120093/ENSG00000163132/ENSG00000137868/ENSG00000114251/ENSG00000184254/ENSG00000167522/ENSG00000150347/ENSG00000108821/ENSG00000083307/ENSG00000134853/ENSG00000119699	14
GO:0060572	morphogenesis of an epithelial bud	8/1884	16/20870	2.88308e-05	0.00123106	0.00101327	ENSG00000066468/ENSG00000114251/ENSG00000169083/ENSG00000101144/ENSG00000168036/ENSG00000070193/ENSG00000164690/ENSG00000137573	8
GO:0003015	heart process	44/1884	258/20870	2.89863e-05	0.00123106	0.00101327	ENSG00000145362/ENSG00000114353/ENSG00000148926/ENSG00000135744/ENSG00000171388/ENSG00000057663/ENSG00000163399/ENSG00000143153/ENSG00000157388/ENSG00000182533/ENSG00000118523/ENSG00000198947/ENSG00000104936/ENSG00000116016/ENSG00000114279/ENSG00000129682/ENSG00000266964/ENSG00000148180/ENSG00000068024/ENSG00000171476/ENSG00000177508/ENSG00000016082/ENSG00000180509/ENSG00000120049/ENSG00000121361…	44
GO:0010959	regulation of metal ion transport	67/1884	449/20870	2.9115e-05	0.00123106	0.00101327	ENSG00000145362/ENSG00000114353/ENSG00000164850/ENSG00000143867/ENSG00000097007/ENSG00000077522/ENSG00000141433/ENSG00000135744/ENSG00000177119/ENSG00000057663/ENSG00000163399/ENSG00000143153/ENSG00000165240/ENSG00000157388/ENSG00000182389/ENSG00000147044/ENSG00000036828/ENSG00000182533/ENSG00000135404/ENSG00000018236/ENSG00000120088/ENSG00000168036/ENSG00000131504/ENSG00000198947/ENSG00000181104…	67
GO:0001709	cell fate determination	16/1884	57/20870	2.94158e-05	0.00123526	0.00101672	ENSG00000143032/ENSG00000221818/ENSG00000179348/ENSG00000007372/ENSG00000117707/ENSG00000168036/ENSG00000153266/ENSG00000176165/ENSG00000105996/ENSG00000016082/ENSG00000138136/ENSG00000081189/ENSG00000225950/ENSG00000075891/ENSG00000204610/ENSG00000125084	16
GO:0042692	muscle cell differentiation	63/1884	416/20870	3.17298e-05	0.0013084	0.00107692	ENSG00000068650/ENSG00000178209/ENSG00000145362/ENSG00000176697/ENSG00000003402/ENSG00000066468/ENSG00000164850/ENSG00000186260/ENSG00000163132/ENSG00000117707/ENSG00000131634/ENSG00000184009/ENSG00000077522/ENSG00000115170/ENSG00000181790/ENSG00000148926/ENSG00000135744/ENSG00000057663/ENSG00000116161/ENSG00000182533/ENSG00000100211/ENSG00000159176/ENSG00000168036/ENSG00000198947/ENSG00000104936…	63
GO:0003007	heart morphogenesis	43/1884	251/20870	3.17977e-05	0.0013084	0.00107692	ENSG00000109472/ENSG00000066468/ENSG00000163132/ENSG00000118257/ENSG00000164093/ENSG00000117707/ENSG00000114251/ENSG00000115170/ENSG00000112414/ENSG00000135541/ENSG00000101144/ENSG00000182533/ENSG00000142871/ENSG00000168036/ENSG00000164741/ENSG00000128917/ENSG00000115641/ENSG00000054598/ENSG00000103241/ENSG00000083307/ENSG00000113196/ENSG00000164107/ENSG00000138002/ENSG00000016082/ENSG00000138136…	43
GO:0050769	positive regulation of neurogenesis	43/1884	251/20870	3.17977e-05	0.0013084	0.00107692	ENSG00000180613/ENSG00000175866/ENSG00000176697/ENSG00000257923/ENSG00000162946/ENSG00000164850/ENSG00000167178/ENSG00000106683/ENSG00000007372/ENSG00000078900/ENSG00000286237/ENSG00000198908/ENSG00000168036/ENSG00000100697/ENSG00000142700/ENSG00000171587/ENSG00000146648/ENSG00000176165/ENSG00000203879/ENSG00000106571/ENSG00000158301/ENSG00000116478/ENSG00000157368/ENSG00000081479/ENSG00000131711…	43
GO:0030325	adrenal gland development	10/1884	25/20870	3.22472e-05	0.00130932	0.00107768	ENSG00000137868/ENSG00000150347/ENSG00000050165/ENSG00000169297/ENSG00000185630/ENSG00000134853/ENSG00000103449/ENSG00000166949/ENSG00000100300/ENSG00000184937	10
GO:0060561	apoptotic process involved in morphogenesis	10/1884	25/20870	3.22472e-05	0.00130932	0.00107768	ENSG00000153094/ENSG00000101144/ENSG00000142871/ENSG00000054598/ENSG00000164107/ENSG00000184916/ENSG00000075891/ENSG00000125618/ENSG00000067182/ENSG00000028137	10
GO:0048538	thymus development	14/1884	46/20870	3.40522e-05	0.00137351	0.00113051	ENSG00000105997/ENSG00000097007/ENSG00000160224/ENSG00000153094/ENSG00000168036/ENSG00000182580/ENSG00000070193/ENSG00000164107/ENSG00000002822/ENSG00000185630/ENSG00000129465/ENSG00000164690/ENSG00000100625/ENSG00000142168	14
GO:0007160	cell-matrix adhesion	45/1884	268/20870	3.50879e-05	0.00139127	0.00114513	ENSG00000168477/ENSG00000162946/ENSG00000128652/ENSG00000145113/ENSG00000138964/ENSG00000097007/ENSG00000184009/ENSG00000077522/ENSG00000151388/ENSG00000163638/ENSG00000047648/ENSG00000102606/ENSG00000153094/ENSG00000113916/ENSG00000147044/ENSG00000151882/ENSG00000118523/ENSG00000135404/ENSG00000153283/ENSG00000105810/ENSG00000103647/ENSG00000168036/ENSG00000204580/ENSG00000164741/ENSG00000112679…	45
GO:0030177	positive regulation of Wnt signaling pathway	29/1884	145/20870	3.51459e-05	0.00139127	0.00114513	ENSG00000162946/ENSG00000105880/ENSG00000066468/ENSG00000101849/ENSG00000114251/ENSG00000097007/ENSG00000184675/ENSG00000135299/ENSG00000182220/ENSG00000108821/ENSG00000169118/ENSG00000158813/ENSG00000146648/ENSG00000189319/ENSG00000070193/ENSG00000147257/ENSG00000107104/ENSG00000179528/ENSG00000100614/ENSG00000169071/ENSG00000103449/ENSG00000145423/ENSG00000164690/ENSG00000166949/ENSG00000124766…	29
GO:0048663	neuron fate commitment	18/1884	70/20870	3.51732e-05	0.00139127	0.00114513	ENSG00000180613/ENSG00000119042/ENSG00000179348/ENSG00000007372/ENSG00000128917/ENSG00000115844/ENSG00000142700/ENSG00000104413/ENSG00000153266/ENSG00000176165/ENSG00000106571/ENSG00000128710/ENSG00000016082/ENSG00000159556/ENSG00000184916/ENSG00000138136/ENSG00000164690/ENSG00000125084	18
GO:0009798	axis specification	21/1884	90/20870	3.9712e-05	0.00156073	0.00128461	ENSG00000007372/ENSG00000164093/ENSG00000114251/ENSG00000135541/ENSG00000125931/ENSG00000168036/ENSG00000115109/ENSG00000070193/ENSG00000147257/ENSG00000175879/ENSG00000138002/ENSG00000273706/ENSG00000179598/ENSG00000164690/ENSG00000138083/ENSG00000137834/ENSG00000159167/ENSG00000164458/ENSG00000116035/ENSG00000125084/ENSG00000184937	21
GO:0048485	sympathetic nervous system development	9/1884	21/20870	4.20086e-05	0.00164048	0.00135025	ENSG00000118257/ENSG00000168036/ENSG00000168621/ENSG00000146013/ENSG00000164107/ENSG00000099250/ENSG00000165462/ENSG00000176887/ENSG00000124766	9
GO:0048806	genitalia development	14/1884	47/20870	4.44966e-05	0.00172664	0.00142116	ENSG00000137868/ENSG00000114251/ENSG00000169083/ENSG00000168036/ENSG00000205981/ENSG00000091831/ENSG00000070193/ENSG00000138039/ENSG00000273706/ENSG00000081479/ENSG00000134853/ENSG00000169071/ENSG00000164690/ENSG00000184937	14
GO:0031076	embryonic camera-type eye development	12/1884	36/20870	4.51641e-05	0.00174152	0.00143341	ENSG00000007372/ENSG00000117707/ENSG00000137868/ENSG00000114251/ENSG00000184254/ENSG00000101144/ENSG00000070193/ENSG00000138002/ENSG00000075891/ENSG00000138083/ENSG00000176887/ENSG00000122691	12
GO:0007015	actin filament organization	69/1884	473/20870	4.63942e-05	0.00177777	0.00146325	ENSG00000175866/ENSG00000178209/ENSG00000007237/ENSG00000106683/ENSG00000117707/ENSG00000097007/ENSG00000184009/ENSG00000077522/ENSG00000115091/ENSG00000075340/ENSG00000149925/ENSG00000047648/ENSG00000128298/ENSG00000188277/ENSG00000042493/ENSG00000077549/ENSG00000182533/ENSG00000118523/ENSG00000163171/ENSG00000172725/ENSG00000103647/ENSG00000044115/ENSG00000055163/ENSG00000131504/ENSG00000164741…	69
GO:0051961	negative regulation of nervous system development	31/1884	162/20870	4.70275e-05	0.00179084	0.00147401	ENSG00000007372/ENSG00000012171/ENSG00000114251/ENSG00000141433/ENSG00000101144/ENSG00000143418/ENSG00000044115/ENSG00000168036/ENSG00000187323/ENSG00000100697/ENSG00000090932/ENSG00000115844/ENSG00000146425/ENSG00000129682/ENSG00000203879/ENSG00000170075/ENSG00000125968/ENSG00000182054/ENSG00000112333/ENSG00000099250/ENSG00000105894/ENSG00000182175/ENSG00000185008/ENSG00000170381/ENSG00000082684…	31
GO:0072148	epithelial cell fate commitment	8/1884	17/20870	5.01435e-05	0.00189771	0.00156197	ENSG00000117707/ENSG00000115170/ENSG00000004848/ENSG00000104413/ENSG00000184916/ENSG00000185551/ENSG00000099250/ENSG00000162493	8
GO:0060047	heart contraction	42/1884	248/20870	5.14102e-05	0.00193372	0.00159161	ENSG00000145362/ENSG00000148926/ENSG00000135744/ENSG00000171388/ENSG00000057663/ENSG00000163399/ENSG00000143153/ENSG00000157388/ENSG00000182533/ENSG00000118523/ENSG00000198947/ENSG00000104936/ENSG00000116016/ENSG00000114279/ENSG00000129682/ENSG00000266964/ENSG00000148180/ENSG00000068024/ENSG00000171476/ENSG00000177508/ENSG00000016082/ENSG00000180509/ENSG00000120049/ENSG00000121361/ENSG00000207713…	42
GO:0060538	skeletal muscle organ development	33/1884	178/20870	5.26637e-05	0.00196879	0.00162047	ENSG00000178209/ENSG00000003402/ENSG00000137868/ENSG00000167612/ENSG00000168036/ENSG00000108654/ENSG00000198947/ENSG00000142700/ENSG00000167196/ENSG00000137312/ENSG00000183770/ENSG00000114416/ENSG00000068024/ENSG00000136630/ENSG00000128710/ENSG00000167244/ENSG00000081189/ENSG00000106511/ENSG00000178860/ENSG00000122180/ENSG00000185551/ENSG00000176046/ENSG00000164690/ENSG00000168779/ENSG00000100625…	33
GO:0051494	negative regulation of cytoskeleton organization	32/1884	171/20870	5.62885e-05	0.00209154	0.00172151	ENSG00000141556/ENSG00000075340/ENSG00000047648/ENSG00000102606/ENSG00000166780/ENSG00000042493/ENSG00000077549/ENSG00000182533/ENSG00000172725/ENSG00000103647/ENSG00000164741/ENSG00000162643/ENSG00000125746/ENSG00000129682/ENSG00000148180/ENSG00000107104/ENSG00000140854/ENSG00000131711/ENSG00000105976/ENSG00000165175/ENSG00000179820/ENSG00000070087/ENSG00000144824/ENSG00000121879/ENSG00000145675…	32
GO:0031016	pancreas development	19/1884	79/20870	5.86849e-05	0.00216745	0.00178399	ENSG00000007372/ENSG00000117707/ENSG00000114251/ENSG00000105810/ENSG00000168036/ENSG00000070193/ENSG00000103241/ENSG00000275410/ENSG00000167244/ENSG00000016082/ENSG00000134138/ENSG00000105976/ENSG00000102854/ENSG00000109705/ENSG00000116833/ENSG00000169856/ENSG00000164690/ENSG00000124766/ENSG00000148737	19
GO:0090130	tissue migration	59/1884	391/20870	6.18717e-05	0.00227147	0.00186961	ENSG00000179348/ENSG00000144711/ENSG00000118257/ENSG00000117707/ENSG00000114251/ENSG00000097007/ENSG00000163017/ENSG00000163638/ENSG00000181790/ENSG00000135744/ENSG00000154188/ENSG00000091879/ENSG00000176435/ENSG00000172725/ENSG00000138061/ENSG00000128917/ENSG00000197635/ENSG00000115109/ENSG00000070193/ENSG00000103241/ENSG00000114861/ENSG00000116717/ENSG00000083307/ENSG00000030582/ENSG00000189403…	59
GO:0110053	regulation of actin filament organization	48/1884	299/20870	6.31909e-05	0.00230609	0.0018981	ENSG00000175866/ENSG00000106683/ENSG00000097007/ENSG00000184009/ENSG00000077522/ENSG00000115091/ENSG00000075340/ENSG00000047648/ENSG00000128298/ENSG00000188277/ENSG00000042493/ENSG00000077549/ENSG00000118523/ENSG00000163171/ENSG00000172725/ENSG00000103647/ENSG00000055163/ENSG00000164741/ENSG00000162643/ENSG00000148180/ENSG00000125968/ENSG00000119185/ENSG00000107104/ENSG00000105976/ENSG00000179820…	48
GO:0050768	negative regulation of neurogenesis	30/1884	157/20870	6.35735e-05	0.00230633	0.0018983	ENSG00000007372/ENSG00000012171/ENSG00000114251/ENSG00000141433/ENSG00000101144/ENSG00000143418/ENSG00000044115/ENSG00000168036/ENSG00000187323/ENSG00000100697/ENSG00000090932/ENSG00000115844/ENSG00000146425/ENSG00000129682/ENSG00000203879/ENSG00000170075/ENSG00000125968/ENSG00000182054/ENSG00000112333/ENSG00000099250/ENSG00000105894/ENSG00000182175/ENSG00000170381/ENSG00000082684/ENSG00000143434…	30
GO:0060348	bone development	38/1884	219/20870	6.73702e-05	0.00242969	0.00199983	ENSG00000105880/ENSG00000066468/ENSG00000143995/ENSG00000163132/ENSG00000164093/ENSG00000162551/ENSG00000184675/ENSG00000182718/ENSG00000071553/ENSG00000242252/ENSG00000182492/ENSG00000104331/ENSG00000131873/ENSG00000108821/ENSG00000151702/ENSG00000054598/ENSG00000114861/ENSG00000106571/ENSG00000138002/ENSG00000174697/ENSG00000128606/ENSG00000012174/ENSG00000081189/ENSG00000124813/ENSG00000145423…	38
GO:0010720	positive regulation of cell development	51/1884	325/20870	6.93926e-05	0.00248799	0.00204782	ENSG00000180613/ENSG00000175866/ENSG00000176697/ENSG00000257923/ENSG00000162946/ENSG00000164850/ENSG00000167178/ENSG00000106683/ENSG00000007372/ENSG00000078900/ENSG00000097007/ENSG00000102606/ENSG00000286237/ENSG00000071553/ENSG00000198908/ENSG00000169594/ENSG00000168036/ENSG00000100697/ENSG00000142700/ENSG00000171587/ENSG00000146648/ENSG00000176165/ENSG00000203879/ENSG00000106571/ENSG00000158301…	51
GO:0021537	telencephalon development	45/1884	276/20870	7.25792e-05	0.00258711	0.0021294	ENSG00000180613/ENSG00000162946/ENSG00000105880/ENSG00000159217/ENSG00000162761/ENSG00000007372/ENSG00000117707/ENSG00000110436/ENSG00000164828/ENSG00000114251/ENSG00000184254/ENSG00000004848/ENSG00000137343/ENSG00000166780/ENSG00000105810/ENSG00000149187/ENSG00000168036/ENSG00000115844/ENSG00000142700/ENSG00000096093/ENSG00000182580/ENSG00000149557/ENSG00000128610/ENSG00000153266/ENSG00000129682…	45
GO:0060541	respiratory system development	38/1884	220/20870	7.44787e-05	0.00263405	0.00216804	ENSG00000105880/ENSG00000066468/ENSG00000115318/ENSG00000117707/ENSG00000137868/ENSG00000114251/ENSG00000184254/ENSG00000165240/ENSG00000204463/ENSG00000118523/ENSG00000168036/ENSG00000158813/ENSG00000146648/ENSG00000126767/ENSG00000116016/ENSG00000070193/ENSG00000103241/ENSG00000106571/ENSG00000147257/ENSG00000083307/ENSG00000189403/ENSG00000171476/ENSG00000133703/ENSG00000178860/ENSG00000134853…	38
GO:2000179	positive regulation of neural precursor cell proliferation	15/1884	55/20870	7.47553e-05	0.00263405	0.00216804	ENSG00000162946/ENSG00000114353/ENSG00000007372/ENSG00000117707/ENSG00000168036/ENSG00000128917/ENSG00000142700/ENSG00000176165/ENSG00000106571/ENSG00000170075/ENSG00000273706/ENSG00000081479/ENSG00000112333/ENSG00000171540/ENSG00000164690	15
GO:0007416	synapse assembly	34/1884	189/20870	7.65594e-05	0.00266754	0.00219561	ENSG00000146555/ENSG00000176697/ENSG00000146938/ENSG00000114251/ENSG00000075340/ENSG00000181790/ENSG00000188157/ENSG00000286237/ENSG00000198908/ENSG00000113100/ENSG00000171587/ENSG00000114867/ENSG00000182580/ENSG00000129682/ENSG00000022355/ENSG00000183098/ENSG00000158301/ENSG00000189108/ENSG00000198739/ENSG00000166159/ENSG00000131711/ENSG00000169057/ENSG00000081189/ENSG00000179915/ENSG00000272674…	34
GO:1902105	regulation of leukocyte differentiation	53/1884	343/20870	7.65761e-05	0.00266754	0.00219561	ENSG00000179348/ENSG00000115318/ENSG00000097007/ENSG00000071553/ENSG00000113916/ENSG00000242252/ENSG00000104267/ENSG00000105810/ENSG00000168036/ENSG00000135144/ENSG00000187741/ENSG00000100225/ENSG00000182511/ENSG00000114861/ENSG00000106571/ENSG00000204252/ENSG00000204632/ENSG00000136630/ENSG00000189403/ENSG00000122592/ENSG00000161405/ENSG00000162891/ENSG00000157368/ENSG00000122641/ENSG00000137265…	53
GO:0003151	outflow tract morphogenesis	18/1884	74/20870	7.77457e-05	0.00269299	0.00221655	ENSG00000066468/ENSG00000118257/ENSG00000164093/ENSG00000114251/ENSG00000101144/ENSG00000168036/ENSG00000054598/ENSG00000164107/ENSG00000016082/ENSG00000081479/ENSG00000081189/ENSG00000164128/ENSG00000099250/ENSG00000185008/ENSG00000145423/ENSG00000137834/ENSG00000176887/ENSG00000122691	18
GO:0046545	development of primary female sexual characteristics	22/1884	101/20870	8.00206e-05	0.00274241	0.00225723	ENSG00000141433/ENSG00000150347/ENSG00000092758/ENSG00000044115/ENSG00000126733/ENSG00000091831/ENSG00000187741/ENSG00000221829/ENSG00000054598/ENSG00000183770/ENSG00000148935/ENSG00000122641/ENSG00000163083/ENSG00000174697/ENSG00000138039/ENSG00000185551/ENSG00000176046/ENSG00000134853/ENSG00000185008/ENSG00000142168/ENSG00000184937/ENSG00000179059	22
GO:0007224	smoothened signaling pathway	28/1884	144/20870	8.00672e-05	0.00274241	0.00225723	ENSG00000066468/ENSG00000007372/ENSG00000131873/ENSG00000044115/ENSG00000146038/ENSG00000187240/ENSG00000145743/ENSG00000070193/ENSG00000103241/ENSG00000106571/ENSG00000120370/ENSG00000147257/ENSG00000170075/ENSG00000138002/ENSG00000166813/ENSG00000102858/ENSG00000147383/ENSG00000142875/ENSG00000165186/ENSG00000111783/ENSG00000169071/ENSG00000124813/ENSG00000164690/ENSG00000168779/ENSG00000204852…	28
GO:0060513	prostatic bud formation	6/1884	10/20870	8.19058e-05	0.0027898	0.00229624	ENSG00000114251/ENSG00000169083/ENSG00000101144/ENSG00000070193/ENSG00000164690/ENSG00000137573	6
GO:0043542	endothelial cell migration	48/1884	303/20870	8.8317e-05	0.00298332	0.00245552	ENSG00000179348/ENSG00000118257/ENSG00000117707/ENSG00000114251/ENSG00000097007/ENSG00000163638/ENSG00000181790/ENSG00000135744/ENSG00000154188/ENSG00000091879/ENSG00000176435/ENSG00000172725/ENSG00000138061/ENSG00000128917/ENSG00000197635/ENSG00000114861/ENSG00000116717/ENSG00000030582/ENSG00000189403/ENSG00000106211/ENSG00000125968/ENSG00000119185/ENSG00000169057/ENSG00000081189/ENSG00000106511…	48
GO:0061572	actin filament bundle organization	32/1884	175/20870	8.91475e-05	0.00298332	0.00245552	ENSG00000175866/ENSG00000106683/ENSG00000097007/ENSG00000184009/ENSG00000075340/ENSG00000047648/ENSG00000128298/ENSG00000118523/ENSG00000172725/ENSG00000103647/ENSG00000164741/ENSG00000113657/ENSG00000144488/ENSG00000125968/ENSG00000119185/ENSG00000105976/ENSG00000111859/ENSG00000099250/ENSG00000070087/ENSG00000144824/ENSG00000145675/ENSG00000089159/ENSG00000187164/ENSG00000166949/ENSG00000120896…	32
GO:0048864	stem cell development	20/1884	88/20870	8.91748e-05	0.00298332	0.00245552	ENSG00000118257/ENSG00000164093/ENSG00000012171/ENSG00000115170/ENSG00000101144/ENSG00000187553/ENSG00000090776/ENSG00000054598/ENSG00000168505/ENSG00000168621/ENSG00000164107/ENSG00000016082/ENSG00000153944/ENSG00000099250/ENSG00000170381/ENSG00000082684/ENSG00000143434/ENSG00000164690/ENSG00000176887/ENSG00000122691	20
GO:0007178	transmembrane receptor protein serine/threonine kinase signaling pathway	57/1884	379/20870	8.95935e-05	0.00298332	0.00245552	ENSG00000105880/ENSG00000163132/ENSG00000114251/ENSG00000097007/ENSG00000115170/ENSG00000111254/ENSG00000101144/ENSG00000151136/ENSG00000182533/ENSG00000142871/ENSG00000171310/ENSG00000176194/ENSG00000125931/ENSG00000108654/ENSG00000050165/ENSG00000112679/ENSG00000070193/ENSG00000122176/ENSG00000140564/ENSG00000156466/ENSG00000147257/ENSG00000204389/ENSG00000125968/ENSG00000144730/ENSG00000122641…	57
GO:0061005	cell differentiation involved in kidney development	16/1884	62/20870	9.00203e-05	0.00298332	0.00245552	ENSG00000143867/ENSG00000184675/ENSG00000272398/ENSG00000125931/ENSG00000168036/ENSG00000168621/ENSG00000106571/ENSG00000273706/ENSG00000081189/ENSG00000075891/ENSG00000125618/ENSG00000198914/ENSG00000103449/ENSG00000164690/ENSG00000118526/ENSG00000184937	16
GO:0045137	development of primary sexual characteristics	39/1884	230/20870	9.10739e-05	0.00300201	0.0024709	ENSG00000013619/ENSG00000143867/ENSG00000114251/ENSG00000141433/ENSG00000169083/ENSG00000150347/ENSG00000085224/ENSG00000153094/ENSG00000092758/ENSG00000044115/ENSG00000126733/ENSG00000091831/ENSG00000187741/ENSG00000221829/ENSG00000054598/ENSG00000183770/ENSG00000148935/ENSG00000078399/ENSG00000122641/ENSG00000163083/ENSG00000174697/ENSG00000138039/ENSG00000081479/ENSG00000169297/ENSG00000185551…	39
GO:0045778	positive regulation of ossification	14/1884	50/20870	9.43639e-05	0.00309382	0.00254647	ENSG00000143867/ENSG00000114251/ENSG00000115170/ENSG00000177119/ENSG00000101144/ENSG00000142871/ENSG00000133116/ENSG00000081189/ENSG00000105894/ENSG00000166949/ENSG00000176887/ENSG00000006128/ENSG00000119699/ENSG00000169884	14
GO:0030258	lipid modification	40/1884	239/20870	9.99635e-05	0.00324973	0.00267479	ENSG00000173208/ENSG00000175164/ENSG00000076555/ENSG00000075239/ENSG00000006831/ENSG00000006530/ENSG00000135744/ENSG00000184984/ENSG00000110090/ENSG00000161544/ENSG00000140465/ENSG00000130649/ENSG00000145476/ENSG00000065357/ENSG00000102780/ENSG00000274588/ENSG00000149091/ENSG00000121310/ENSG00000140374/ENSG00000139160/ENSG00000163586/ENSG00000072506/ENSG00000068383/ENSG00000204084/ENSG00000169047…	40
GO:0003156	regulation of animal organ formation	10/1884	28/20870	0.000100594	0.00324973	0.00267479	ENSG00000114251/ENSG00000169083/ENSG00000101144/ENSG00000168036/ENSG00000070193/ENSG00000168621/ENSG00000185008/ENSG00000164690/ENSG00000137573/ENSG00000184937	10
GO:0014032	neural crest cell development	19/1884	82/20870	0.000100709	0.00324973	0.00267479	ENSG00000118257/ENSG00000164093/ENSG00000012171/ENSG00000115170/ENSG00000101144/ENSG00000187553/ENSG00000090776/ENSG00000054598/ENSG00000168505/ENSG00000168621/ENSG00000164107/ENSG00000016082/ENSG00000099250/ENSG00000170381/ENSG00000082684/ENSG00000143434/ENSG00000164690/ENSG00000176887/ENSG00000122691	19
GO:0016055	Wnt signaling pathway	67/1884	468/20870	0.000105314	0.00338054	0.00278246	ENSG00000133937/ENSG00000167693/ENSG00000109472/ENSG00000162946/ENSG00000105880/ENSG00000066468/ENSG00000101849/ENSG00000114251/ENSG00000097007/ENSG00000184675/ENSG00000165566/ENSG00000135299/ENSG00000182220/ENSG00000131668/ENSG00000100211/ENSG00000272398/ENSG00000125931/ENSG00000108821/ENSG00000169118/ENSG00000164932/ENSG00000168036/ENSG00000146038/ENSG00000167986/ENSG00000050165/ENSG00000104901…	67
GO:0008585	female gonad development	21/1884	96/20870	0.000108009	0.00344899	0.0028388	ENSG00000141433/ENSG00000150347/ENSG00000092758/ENSG00000044115/ENSG00000091831/ENSG00000187741/ENSG00000221829/ENSG00000054598/ENSG00000183770/ENSG00000148935/ENSG00000122641/ENSG00000163083/ENSG00000174697/ENSG00000138039/ENSG00000185551/ENSG00000176046/ENSG00000134853/ENSG00000185008/ENSG00000142168/ENSG00000184937/ENSG00000179059	21
GO:0008406	gonad development	38/1884	224/20870	0.000110225	0.00350148	0.00288201	ENSG00000013619/ENSG00000143867/ENSG00000114251/ENSG00000141433/ENSG00000169083/ENSG00000150347/ENSG00000085224/ENSG00000153094/ENSG00000092758/ENSG00000044115/ENSG00000091831/ENSG00000187741/ENSG00000221829/ENSG00000054598/ENSG00000183770/ENSG00000148935/ENSG00000078399/ENSG00000122641/ENSG00000163083/ENSG00000174697/ENSG00000138039/ENSG00000081479/ENSG00000169297/ENSG00000185551/ENSG00000176046…	38
GO:1904062	regulation of cation transmembrane transport	57/1884	382/20870	0.000111237	0.00351543	0.00289349	ENSG00000145362/ENSG00000164850/ENSG00000143867/ENSG00000097007/ENSG00000077522/ENSG00000135744/ENSG00000177119/ENSG00000057663/ENSG00000143153/ENSG00000165240/ENSG00000157388/ENSG00000182389/ENSG00000182533/ENSG00000135404/ENSG00000138495/ENSG00000120088/ENSG00000196730/ENSG00000131504/ENSG00000198947/ENSG00000181104/ENSG00000127533/ENSG00000114279/ENSG00000129682/ENSG00000102466/ENSG00000022267…	57
GO:0198738	cell-cell signaling by wnt	67/1884	470/20870	0.000119664	0.00376236	0.00309673	ENSG00000133937/ENSG00000167693/ENSG00000109472/ENSG00000162946/ENSG00000105880/ENSG00000066468/ENSG00000101849/ENSG00000114251/ENSG00000097007/ENSG00000184675/ENSG00000165566/ENSG00000135299/ENSG00000182220/ENSG00000131668/ENSG00000100211/ENSG00000272398/ENSG00000125931/ENSG00000108821/ENSG00000169118/ENSG00000164932/ENSG00000168036/ENSG00000146038/ENSG00000167986/ENSG00000050165/ENSG00000104901…	67
GO:0044706	multi-multicellular organism process	39/1884	233/20870	0.00012101	0.00378527	0.00311559	ENSG00000023839/ENSG00000068366/ENSG00000141433/ENSG00000006831/ENSG00000148926/ENSG00000135744/ENSG00000091879/ENSG00000169083/ENSG00000111348/ENSG00000116539/ENSG00000165240/ENSG00000086062/ENSG00000093010/ENSG00000120088/ENSG00000140465/ENSG00000204580/ENSG00000102967/ENSG00000104901/ENSG00000091831/ENSG00000188620/ENSG00000133703/ENSG00000174697/ENSG00000185551/ENSG00000145730/ENSG00000057657…	39
GO:1903706	regulation of hemopoiesis	64/1884	444/20870	0.000122084	0.00379947	0.00312728	ENSG00000179348/ENSG00000204388/ENSG00000115318/ENSG00000143995/ENSG00000097007/ENSG00000071553/ENSG00000113916/ENSG00000242252/ENSG00000104267/ENSG00000105810/ENSG00000119535/ENSG00000168036/ENSG00000135144/ENSG00000187741/ENSG00000100225/ENSG00000182511/ENSG00000114861/ENSG00000106571/ENSG00000204252/ENSG00000204632/ENSG00000136630/ENSG00000189403/ENSG00000122592/ENSG00000078399/ENSG00000120068…	64
GO:0045444	fat cell differentiation	42/1884	258/20870	0.000128595	0.0039819	0.00327743	ENSG00000048540/ENSG00000221818/ENSG00000179348/ENSG00000164850/ENSG00000114251/ENSG00000148671/ENSG00000130173/ENSG00000150347/ENSG00000122644/ENSG00000137343/ENSG00000101144/ENSG00000082196/ENSG00000100211/ENSG00000163624/ENSG00000175029/ENSG00000104901/ENSG00000070193/ENSG00000156466/ENSG00000149948/ENSG00000163083/ENSG00000174697/ENSG00000175445/ENSG00000176845/ENSG00000150051/ENSG00000153234…	42
GO:0072074	kidney mesenchyme development	8/1884	19/20870	0.000132215	0.00405306	0.003336	ENSG00000143867/ENSG00000184675/ENSG00000101144/ENSG00000075891/ENSG00000164690/ENSG00000100625/ENSG00000118526/ENSG00000184937	8
GO:2000696	regulation of epithelial cell differentiation involved in kidney development	8/1884	19/20870	0.000132215	0.00405306	0.003336	ENSG00000143867/ENSG00000272398/ENSG00000125931/ENSG00000168036/ENSG00000168621/ENSG00000273706/ENSG00000075891/ENSG00000125618	8
GO:0051017	actin filament bundle assembly	31/1884	171/20870	0.000134255	0.0040951	0.0033706	ENSG00000175866/ENSG00000106683/ENSG00000097007/ENSG00000184009/ENSG00000075340/ENSG00000047648/ENSG00000128298/ENSG00000118523/ENSG00000172725/ENSG00000103647/ENSG00000164741/ENSG00000113657/ENSG00000144488/ENSG00000125968/ENSG00000119185/ENSG00000105976/ENSG00000111859/ENSG00000099250/ENSG00000070087/ENSG00000144824/ENSG00000145675/ENSG00000089159/ENSG00000166949/ENSG00000120896/ENSG00000133789…	31
GO:0010463	mesenchymal cell proliferation	12/1884	40/20870	0.000143397	0.00433711	0.0035698	ENSG00000066468/ENSG00000163132/ENSG00000143867/ENSG00000114251/ENSG00000101144/ENSG00000168036/ENSG00000103241/ENSG00000147257/ENSG00000164107/ENSG00000105894/ENSG00000164690/ENSG00000168779	12
GO:0040013	negative regulation of locomotion	62/1884	429/20870	0.000143604	0.00433711	0.0035698	ENSG00000185885/ENSG00000012171/ENSG00000114251/ENSG00000163638/ENSG00000181790/ENSG00000006831/ENSG00000091879/ENSG00000111348/ENSG00000166780/ENSG00000130303/ENSG00000134830/ENSG00000151882/ENSG00000143418/ENSG00000172725/ENSG00000044115/ENSG00000161544/ENSG00000138061/ENSG00000164741/ENSG00000128917/ENSG00000162643/ENSG00000197635/ENSG00000113657/ENSG00000112679/ENSG00000116717/ENSG00000146535…	62
GO:0060571	morphogenesis of an epithelial fold	9/1884	24/20870	0.000145548	0.00435552	0.00358495	ENSG00000066468/ENSG00000114251/ENSG00000169083/ENSG00000101144/ENSG00000099954/ENSG00000168036/ENSG00000070193/ENSG00000164690/ENSG00000137573	9
GO:1902905	positive regulation of supramolecular fiber organization	39/1884	235/20870	0.000145634	0.00435552	0.00358495	ENSG00000175866/ENSG00000204388/ENSG00000106683/ENSG00000117707/ENSG00000097007/ENSG00000077522/ENSG00000115091/ENSG00000128298/ENSG00000188277/ENSG00000182533/ENSG00000118523/ENSG00000163171/ENSG00000172725/ENSG00000162643/ENSG00000182511/ENSG00000148180/ENSG00000204389/ENSG00000125968/ENSG00000119185/ENSG00000140854/ENSG00000131711/ENSG00000169057/ENSG00000105976/ENSG00000197879/ENSG00000099250…	39
GO:0090132	epithelium migration	57/1884	386/20870	0.000147504	0.00438798	0.00361166	ENSG00000179348/ENSG00000144711/ENSG00000118257/ENSG00000117707/ENSG00000114251/ENSG00000097007/ENSG00000163638/ENSG00000181790/ENSG00000135744/ENSG00000154188/ENSG00000091879/ENSG00000176435/ENSG00000172725/ENSG00000138061/ENSG00000128917/ENSG00000197635/ENSG00000115109/ENSG00000070193/ENSG00000114861/ENSG00000116717/ENSG00000083307/ENSG00000030582/ENSG00000189403/ENSG00000106211/ENSG00000114378…	57
GO:0010171	body morphogenesis	13/1884	46/20870	0.000150298	0.00438798	0.00361166	ENSG00000198807/ENSG00000105880/ENSG00000163132/ENSG00000137868/ENSG00000167522/ENSG00000150347/ENSG00000182220/ENSG00000108821/ENSG00000147257/ENSG00000181541/ENSG00000134853/ENSG00000144824/ENSG00000119699	13
GO:0016202	regulation of striated muscle tissue development	13/1884	46/20870	0.000150298	0.00438798	0.00361166	ENSG00000186260/ENSG00000168036/ENSG00000186895/ENSG00000137312/ENSG00000167244/ENSG00000081189/ENSG00000122180/ENSG00000164690/ENSG00000168779/ENSG00000166949/ENSG00000129194/ENSG00000122691/ENSG00000169884	13
GO:0021983	pituitary gland development	13/1884	46/20870	0.000150298	0.00438798	0.00361166	ENSG00000134595/ENSG00000179348/ENSG00000163132/ENSG00000007372/ENSG00000164093/ENSG00000114251/ENSG00000141433/ENSG00000070193/ENSG00000016082/ENSG00000169297/ENSG00000171540/ENSG00000103449/ENSG00000138083	13
GO:0048566	embryonic digestive tract development	13/1884	46/20870	0.000150298	0.00438798	0.00361166	ENSG00000066468/ENSG00000137868/ENSG00000070193/ENSG00000103241/ENSG00000106571/ENSG00000136630/ENSG00000134853/ENSG00000103449/ENSG00000164690/ENSG00000168779/ENSG00000176887/ENSG00000118526/ENSG00000232810	13
GO:0060253	negative regulation of glial cell proliferation	7/1884	15/20870	0.000162025	0.00466373	0.00383863	ENSG00000141433/ENSG00000143418/ENSG00000100697/ENSG00000182054/ENSG00000105894/ENSG00000176887/ENSG00000100300	7
GO:0072075	metanephric mesenchyme development	7/1884	15/20870	0.000162025	0.00466373	0.00383863	ENSG00000143867/ENSG00000101144/ENSG00000075891/ENSG00000164690/ENSG00000100625/ENSG00000118526/ENSG00000184937	7
GO:0072160	nephron tubule epithelial cell differentiation	7/1884	15/20870	0.000162025	0.00466373	0.00383863	ENSG00000143867/ENSG00000272398/ENSG00000168036/ENSG00000273706/ENSG00000081189/ENSG00000075891/ENSG00000125618	7
GO:0032231	regulation of actin filament bundle assembly	23/1884	113/20870	0.000165578	0.00470101	0.00386932	ENSG00000106683/ENSG00000097007/ENSG00000184009/ENSG00000047648/ENSG00000118523/ENSG00000103647/ENSG00000164741/ENSG00000125968/ENSG00000119185/ENSG00000105976/ENSG00000099250/ENSG00000070087/ENSG00000144824/ENSG00000145675/ENSG00000089159/ENSG00000166949/ENSG00000120896/ENSG00000133789/ENSG00000172403/ENSG00000006128/ENSG00000119699/ENSG00000140416/ENSG00000158195	23
GO:0021889	olfactory bulb interneuron differentiation	6/1884	11/20870	0.000166387	0.00470101	0.00386932	ENSG00000180613/ENSG00000105880/ENSG00000114251/ENSG00000004848/ENSG00000185008/ENSG00000103449	6
GO:0032000	positive regulation of fatty acid beta-oxidation	6/1884	11/20870	0.000166387	0.00470101	0.00386932	ENSG00000173208/ENSG00000110090/ENSG00000163586/ENSG00000169047/ENSG00000175701/ENSG00000122691	6
GO:1902337	regulation of apoptotic process involved in morphogenesis	6/1884	11/20870	0.000166387	0.00470101	0.00386932	ENSG00000101144/ENSG00000054598/ENSG00000075891/ENSG00000125618/ENSG00000067182/ENSG00000028137	6
GO:0021954	central nervous system neuron development	19/1884	85/20870	0.000167323	0.00470575	0.00387322	ENSG00000162946/ENSG00000066468/ENSG00000179348/ENSG00000118257/ENSG00000004848/ENSG00000165240/ENSG00000187323/ENSG00000133083/ENSG00000182580/ENSG00000153266/ENSG00000176165/ENSG00000168505/ENSG00000174697/ENSG00000106852/ENSG00000112333/ENSG00000153234/ENSG00000099250/ENSG00000204852/ENSG00000182704	19
GO:0060560	developmental growth involved in morphogenesis	41/1884	253/20870	0.000169865	0.00475545	0.00391412	ENSG00000143032/ENSG00000176697/ENSG00000162946/ENSG00000066468/ENSG00000167178/ENSG00000106683/ENSG00000124785/ENSG00000118257/ENSG00000012171/ENSG00000114251/ENSG00000097007/ENSG00000168036/ENSG00000055163/ENSG00000187323/ENSG00000133083/ENSG00000204580/ENSG00000171587/ENSG00000115109/ENSG00000091831/ENSG00000070193/ENSG00000129682/ENSG00000126500/ENSG00000203879/ENSG00000273706/ENSG00000139233…	41
GO:0007565	female pregnancy	35/1884	205/20870	0.00017746	0.00494548	0.00407054	ENSG00000023839/ENSG00000068366/ENSG00000141433/ENSG00000006831/ENSG00000148926/ENSG00000135744/ENSG00000091879/ENSG00000169083/ENSG00000111348/ENSG00000116539/ENSG00000165240/ENSG00000093010/ENSG00000120088/ENSG00000204580/ENSG00000102967/ENSG00000091831/ENSG00000188620/ENSG00000133703/ENSG00000174697/ENSG00000185551/ENSG00000145730/ENSG00000057657/ENSG00000113494/ENSG00000105894/ENSG00000116741…	35
GO:0007519	skeletal muscle tissue development	30/1884	166/20870	0.000180814	0.00501615	0.0041287	ENSG00000178209/ENSG00000003402/ENSG00000167612/ENSG00000168036/ENSG00000108654/ENSG00000198947/ENSG00000142700/ENSG00000167196/ENSG00000137312/ENSG00000183770/ENSG00000068024/ENSG00000136630/ENSG00000128710/ENSG00000167244/ENSG00000081189/ENSG00000106511/ENSG00000178860/ENSG00000122180/ENSG00000185551/ENSG00000176046/ENSG00000164690/ENSG00000168779/ENSG00000100625/ENSG00000176887/ENSG00000184343…	30
GO:0035136	forelimb morphogenesis	12/1884	41/20870	0.000186214	0.00511962	0.00421387	ENSG00000163064/ENSG00000052850/ENSG00000163132/ENSG00000143867/ENSG00000085224/ENSG00000168036/ENSG00000078399/ENSG00000128710/ENSG00000124813/ENSG00000164690/ENSG00000168779/ENSG00000122691	12
GO:1902742	apoptotic process involved in development	12/1884	41/20870	0.000186214	0.00511962	0.00421387	ENSG00000153094/ENSG00000101144/ENSG00000142871/ENSG00000054598/ENSG00000164107/ENSG00000184916/ENSG00000075891/ENSG00000125618/ENSG00000185008/ENSG00000138083/ENSG00000067182/ENSG00000028137	12
GO:0048483	autonomic nervous system development	13/1884	47/20870	0.000190751	0.00522096	0.00429728	ENSG00000118257/ENSG00000004848/ENSG00000168036/ENSG00000168505/ENSG00000168621/ENSG00000146013/ENSG00000164107/ENSG00000136630/ENSG00000066735/ENSG00000099250/ENSG00000165462/ENSG00000176887/ENSG00000124766	13
GO:0035282	segmentation	21/1884	100/20870	0.000198575	0.00538702	0.00443396	ENSG00000118257/ENSG00000143867/ENSG00000114251/ENSG00000090932/ENSG00000173253/ENSG00000115109/ENSG00000054598/ENSG00000103241/ENSG00000105996/ENSG00000175879/ENSG00000177508/ENSG00000273706/ENSG00000184634/ENSG00000106511/ENSG00000099250/ENSG00000179598/ENSG00000169071/ENSG00000145423/ENSG00000166949/ENSG00000164458/ENSG00000184937	21
GO:0070252	actin-mediated cell contraction	21/1884	100/20870	0.000198575	0.00538702	0.00443396	ENSG00000145362/ENSG00000163399/ENSG00000157388/ENSG00000182533/ENSG00000115109/ENSG00000114279/ENSG00000129682/ENSG00000148180/ENSG00000180509/ENSG00000121361/ENSG00000049759/ENSG00000113448/ENSG00000162493/ENSG00000121879/ENSG00000158286/ENSG00000187164/ENSG00000101400/ENSG00000159167/ENSG00000118194/ENSG00000140416/ENSG00000130529	21
GO:0043586	tongue development	8/1884	20/20870	0.000202963	0.00548178	0.00451195	ENSG00000168036/ENSG00000146648/ENSG00000106571/ENSG00000164107/ENSG00000116478/ENSG00000225950/ENSG00000100625/ENSG00000169884	8
GO:0003208	cardiac ventricle morphogenesis	17/1884	73/20870	0.000215178	0.00578622	0.00476254	ENSG00000109472/ENSG00000066468/ENSG00000117707/ENSG00000128917/ENSG00000054598/ENSG00000103241/ENSG00000083307/ENSG00000113196/ENSG00000164107/ENSG00000016082/ENSG00000081479/ENSG00000081189/ENSG00000145423/ENSG00000176887/ENSG00000124766/ENSG00000118194/ENSG00000140416	17
GO:0010631	epithelial cell migration	56/1884	383/20870	0.000217621	0.00582636	0.00479557	ENSG00000179348/ENSG00000144711/ENSG00000118257/ENSG00000117707/ENSG00000114251/ENSG00000097007/ENSG00000163638/ENSG00000181790/ENSG00000135744/ENSG00000154188/ENSG00000091879/ENSG00000176435/ENSG00000172725/ENSG00000138061/ENSG00000128917/ENSG00000197635/ENSG00000115109/ENSG00000070193/ENSG00000114861/ENSG00000116717/ENSG00000030582/ENSG00000189403/ENSG00000106211/ENSG00000114378/ENSG00000125968…	56
GO:0110020	regulation of actomyosin structure organization	22/1884	108/20870	0.000224659	0.00596055	0.00490602	ENSG00000106683/ENSG00000117707/ENSG00000097007/ENSG00000184009/ENSG00000047648/ENSG00000182533/ENSG00000118523/ENSG00000103647/ENSG00000164741/ENSG00000119185/ENSG00000105976/ENSG00000099250/ENSG00000070087/ENSG00000144824/ENSG00000145675/ENSG00000089159/ENSG00000166949/ENSG00000120896/ENSG00000006128/ENSG00000119699/ENSG00000140416/ENSG00000158195	22
GO:0046661	male sex differentiation	30/1884	168/20870	0.000224742	0.00596055	0.00490602	ENSG00000013619/ENSG00000114251/ENSG00000169083/ENSG00000150347/ENSG00000085224/ENSG00000153094/ENSG00000092758/ENSG00000044115/ENSG00000168036/ENSG00000091831/ENSG00000187741/ENSG00000070193/ENSG00000078399/ENSG00000122641/ENSG00000138039/ENSG00000081479/ENSG00000169297/ENSG00000176046/ENSG00000134853/ENSG00000123131/ENSG00000100918/ENSG00000169071/ENSG00000145423/ENSG00000164690/ENSG00000100625…	30
GO:0045880	positive regulation of smoothened signaling pathway	11/1884	36/20870	0.00022555	0.00596055	0.00490602	ENSG00000131873/ENSG00000044115/ENSG00000146038/ENSG00000187240/ENSG00000120370/ENSG00000147257/ENSG00000138002/ENSG00000166813/ENSG00000164690/ENSG00000168779/ENSG00000185347	11
GO:0014031	mesenchymal cell development	19/1884	87/20870	0.00023083	0.00607391	0.00499933	ENSG00000118257/ENSG00000164093/ENSG00000012171/ENSG00000115170/ENSG00000101144/ENSG00000187553/ENSG00000090776/ENSG00000054598/ENSG00000168505/ENSG00000168621/ENSG00000164107/ENSG00000016082/ENSG00000099250/ENSG00000170381/ENSG00000082684/ENSG00000143434/ENSG00000164690/ENSG00000176887/ENSG00000122691	19
GO:0030111	regulation of Wnt signaling pathway	51/1884	341/20870	0.000235043	0.00615832	0.0050688	ENSG00000133937/ENSG00000167693/ENSG00000162946/ENSG00000105880/ENSG00000066468/ENSG00000101849/ENSG00000114251/ENSG00000097007/ENSG00000184675/ENSG00000165566/ENSG00000135299/ENSG00000182220/ENSG00000131668/ENSG00000100211/ENSG00000125931/ENSG00000108821/ENSG00000169118/ENSG00000164932/ENSG00000146038/ENSG00000050165/ENSG00000104901/ENSG00000158813/ENSG00000146648/ENSG00000189319/ENSG00000070193…	51
GO:0031032	actomyosin structure organization	35/1884	208/20870	0.000236855	0.00617939	0.00508614	ENSG00000178209/ENSG00000003402/ENSG00000106683/ENSG00000117707/ENSG00000097007/ENSG00000184009/ENSG00000077522/ENSG00000047648/ENSG00000182533/ENSG00000118523/ENSG00000103647/ENSG00000159176/ENSG00000164741/ENSG00000079819/ENSG00000082397/ENSG00000115109/ENSG00000119185/ENSG00000122367/ENSG00000105976/ENSG00000099250/ENSG00000154358/ENSG00000134853/ENSG00000070087/ENSG00000144824/ENSG00000145675…	35
GO:0009954	proximal/distal pattern formation	12/1884	42/20870	0.00023947	0.0062136	0.0051143	ENSG00000163064/ENSG00000143867/ENSG00000131873/ENSG00000168036/ENSG00000115844/ENSG00000070193/ENSG00000106571/ENSG00000078399/ENSG00000128710/ENSG00000177508/ENSG00000185630/ENSG00000138083	12
GO:1901861	regulation of muscle tissue development	13/1884	48/20870	0.000240193	0.0062136	0.0051143	ENSG00000186260/ENSG00000168036/ENSG00000186895/ENSG00000137312/ENSG00000167244/ENSG00000081189/ENSG00000122180/ENSG00000164690/ENSG00000168779/ENSG00000166949/ENSG00000129194/ENSG00000122691/ENSG00000169884	13
GO:0032355	response to estradiol	27/1884	146/20870	0.000252773	0.00651156	0.00535955	ENSG00000003402/ENSG00000164850/ENSG00000023839/ENSG00000135744/ENSG00000156709/ENSG00000084674/ENSG00000153094/ENSG00000101144/ENSG00000121691/ENSG00000118523/ENSG00000108821/ENSG00000168036/ENSG00000146648/ENSG00000091831/ENSG00000057593/ENSG00000070193/ENSG00000100031/ENSG00000172977/ENSG00000174697/ENSG00000131711/ENSG00000122180/ENSG00000185551/ENSG00000125510/ENSG00000145730/ENSG00000151615…	27
GO:0043062	extracellular structure organization	52/1884	351/20870	0.000259914	0.00663972	0.00546503	ENSG00000168477/ENSG00000003402/ENSG00000187498/ENSG00000115318/ENSG00000097007/ENSG00000142303/ENSG00000151388/ENSG00000140470/ENSG00000145808/ENSG00000163638/ENSG00000135744/ENSG00000182718/ENSG00000165240/ENSG00000086062/ENSG00000091986/ENSG00000142871/ENSG00000118523/ENSG00000108821/ENSG00000049089/ENSG00000092758/ENSG00000138061/ENSG00000204580/ENSG00000197635/ENSG00000198759/ENSG00000164318…	52
GO:0048638	regulation of developmental growth	52/1884	351/20870	0.000259914	0.00663972	0.00546503	ENSG00000143032/ENSG00000176697/ENSG00000162946/ENSG00000139318/ENSG00000066468/ENSG00000167178/ENSG00000106683/ENSG00000143995/ENSG00000117707/ENSG00000012171/ENSG00000078900/ENSG00000114251/ENSG00000097007/ENSG00000076555/ENSG00000188157/ENSG00000169083/ENSG00000004848/ENSG00000153094/ENSG00000182533/ENSG00000149187/ENSG00000187323/ENSG00000197406/ENSG00000171587/ENSG00000130829/ENSG00000129682…	52
GO:0001942	hair follicle development	19/1884	88/20870	0.000269837	0.00686461	0.00565014	ENSG00000052850/ENSG00000066468/ENSG00000114251/ENSG00000165240/ENSG00000168036/ENSG00000167968/ENSG00000158813/ENSG00000146648/ENSG00000070193/ENSG00000120370/ENSG00000116478/ENSG00000173083/ENSG00000122641/ENSG00000147383/ENSG00000137497/ENSG00000164690/ENSG00000125285/ENSG00000232810/ENSG00000169884	19
GO:0050678	regulation of epithelial cell proliferation	58/1884	404/20870	0.000275811	0.00696827	0.00573546	ENSG00000003402/ENSG00000105880/ENSG00000066468/ENSG00000179348/ENSG00000118257/ENSG00000143867/ENSG00000007372/ENSG00000117707/ENSG00000114251/ENSG00000232040/ENSG00000164022/ENSG00000171388/ENSG00000178301/ENSG00000169083/ENSG00000165240/ENSG00000086062/ENSG00000134830/ENSG00000147044/ENSG00000105810/ENSG00000168036/ENSG00000128917/ENSG00000006377/ENSG00000146648/ENSG00000070193/ENSG00000147257…	58
GO:1901888	regulation of cell junction assembly	38/1884	234/20870	0.000276185	0.00696827	0.00573546	ENSG00000176697/ENSG00000114251/ENSG00000097007/ENSG00000184009/ENSG00000181790/ENSG00000188157/ENSG00000135744/ENSG00000047648/ENSG00000286237/ENSG00000198908/ENSG00000164741/ENSG00000112679/ENSG00000114867/ENSG00000115109/ENSG00000182580/ENSG00000137312/ENSG00000183098/ENSG00000158301/ENSG00000189108/ENSG00000177508/ENSG00000119185/ENSG00000198739/ENSG00000166159/ENSG00000081189/ENSG00000197879…	38
GO:0030048	actin filament-based movement	25/1884	132/20870	0.0002884	0.00724663	0.00596457	ENSG00000145362/ENSG00000163399/ENSG00000157388/ENSG00000182533/ENSG00000115109/ENSG00000114279/ENSG00000129682/ENSG00000148180/ENSG00000180509/ENSG00000121361/ENSG00000197879/ENSG00000049759/ENSG00000113448/ENSG00000162493/ENSG00000121879/ENSG00000158286/ENSG00000187164/ENSG00000101400/ENSG00000159167/ENSG00000118194/ENSG00000140416/ENSG00000130529/ENSG00000158195/ENSG00000171475/ENSG00000122574	25
GO:0048934	peripheral nervous system neuron differentiation	6/1884	12/20870	0.000307325	0.00759763	0.00625347	ENSG00000006468/ENSG00000164107/ENSG00000128710/ENSG00000016082/ENSG00000159556/ENSG00000159216	6
GO:0048935	peripheral nervous system neuron development	6/1884	12/20870	0.000307325	0.00759763	0.00625347	ENSG00000006468/ENSG00000164107/ENSG00000128710/ENSG00000016082/ENSG00000159556/ENSG00000159216	6
GO:0061029	eyelid development in camera-type eye	6/1884	12/20870	0.000307325	0.00759763	0.00625347	ENSG00000137868/ENSG00000158055/ENSG00000116478/ENSG00000122641/ENSG00000176887/ENSG00000122691	6
GO:1904748	regulation of apoptotic process involved in development	6/1884	12/20870	0.000307325	0.00759763	0.00625347	ENSG00000101144/ENSG00000054598/ENSG00000075891/ENSG00000125618/ENSG00000067182/ENSG00000028137	6
GO:0010594	regulation of endothelial cell migration	40/1884	253/20870	0.000341865	0.00841758	0.00692835	ENSG00000179348/ENSG00000118257/ENSG00000117707/ENSG00000114251/ENSG00000097007/ENSG00000163638/ENSG00000181790/ENSG00000135744/ENSG00000154188/ENSG00000091879/ENSG00000128917/ENSG00000114861/ENSG00000116717/ENSG00000030582/ENSG00000189403/ENSG00000106211/ENSG00000119185/ENSG00000169057/ENSG00000081189/ENSG00000106511/ENSG00000105976/ENSG00000284038/ENSG00000207744/ENSG00000284182/ENSG00000207713…	40
GO:0030509	BMP signaling pathway	28/1884	157/20870	0.000365485	0.00889244	0.00731921	ENSG00000105880/ENSG00000163132/ENSG00000114251/ENSG00000097007/ENSG00000115170/ENSG00000101144/ENSG00000142871/ENSG00000108654/ENSG00000156466/ENSG00000147257/ENSG00000081479/ENSG00000158747/ENSG00000137497/ENSG00000132170/ENSG00000182175/ENSG00000169071/ENSG00000124813/ENSG00000145423/ENSG00000166949/ENSG00000137834/ENSG00000103056/ENSG00000176887/ENSG00000137573/ENSG00000119699/ENSG00000128791…	28
GO:0001707	mesoderm formation	18/1884	83/20870	0.000365502	0.00889244	0.00731921	ENSG00000066468/ENSG00000198431/ENSG00000114251/ENSG00000115170/ENSG00000101144/ENSG00000115109/ENSG00000054598/ENSG00000103241/ENSG00000113196/ENSG00000149948/ENSG00000122641/ENSG00000207713/ENSG00000075891/ENSG00000145423/ENSG00000166949/ENSG00000164458/ENSG00000204610/ENSG00000128791	18
GO:0006029	proteoglycan metabolic process	18/1884	83/20870	0.000365502	0.00889244	0.00731921	ENSG00000147408/ENSG00000151388/ENSG00000182492/ENSG00000104331/ENSG00000171310/ENSG00000147119/ENSG00000131873/ENSG00000168036/ENSG00000170891/ENSG00000164318/ENSG00000116199/ENSG00000176678/ENSG00000173083/ENSG00000125430/ENSG00000114378/ENSG00000107742/ENSG00000137573/ENSG00000148737	18
GO:0003018	vascular process in circulatory system	43/1884	279/20870	0.000367454	0.00890459	0.00732921	ENSG00000178209/ENSG00000117298/ENSG00000164850/ENSG00000196639/ENSG00000147100/ENSG00000110436/ENSG00000023839/ENSG00000125257/ENSG00000114770/ENSG00000141433/ENSG00000148926/ENSG00000135744/ENSG00000154188/ENSG00000171388/ENSG00000057663/ENSG00000036828/ENSG00000180871/ENSG00000146648/ENSG00000181104/ENSG00000054598/ENSG00000179546/ENSG00000119185/ENSG00000121361/ENSG00000174697/ENSG00000081479…	43
GO:0051495	positive regulation of cytoskeleton organization	40/1884	254/20870	0.000371139	0.00895631	0.00737178	ENSG00000175866/ENSG00000204388/ENSG00000106683/ENSG00000117707/ENSG00000097007/ENSG00000077522/ENSG00000115091/ENSG00000128298/ENSG00000188277/ENSG00000182533/ENSG00000118523/ENSG00000163171/ENSG00000172725/ENSG00000162643/ENSG00000197102/ENSG00000182511/ENSG00000148180/ENSG00000204389/ENSG00000125968/ENSG00000119185/ENSG00000140854/ENSG00000131711/ENSG00000169057/ENSG00000105976/ENSG00000197879…	40
GO:0048634	regulation of muscle organ development	13/1884	50/20870	0.00037251	0.00895631	0.00737178	ENSG00000186260/ENSG00000168036/ENSG00000186895/ENSG00000137312/ENSG00000167244/ENSG00000081189/ENSG00000122180/ENSG00000164690/ENSG00000168779/ENSG00000166949/ENSG00000129194/ENSG00000122691/ENSG00000169884	13
GO:0021532	neural tube patterning	11/1884	38/20870	0.000381629	0.00911716	0.00750417	ENSG00000163064/ENSG00000133937/ENSG00000007372/ENSG00000182220/ENSG00000168505/ENSG00000106571/ENSG00000120370/ENSG00000142875/ENSG00000164690/ENSG00000204852/ENSG00000125084	11
GO:0007498	mesoderm development	26/1884	142/20870	0.000382893	0.00911716	0.00750417	ENSG00000066468/ENSG00000143867/ENSG00000141574/ENSG00000198431/ENSG00000114251/ENSG00000115170/ENSG00000101144/ENSG00000090932/ENSG00000115109/ENSG00000054598/ENSG00000103241/ENSG00000113196/ENSG00000149948/ENSG00000161405/ENSG00000122641/ENSG00000177508/ENSG00000273706/ENSG00000207713/ENSG00000075891/ENSG00000072133/ENSG00000145423/ENSG00000164690/ENSG00000166949/ENSG00000164458/ENSG00000204610…	26
GO:0001841	neural tube formation	22/1884	112/20870	0.000384653	0.00911716	0.00750417	ENSG00000114251/ENSG00000097007/ENSG00000148926/ENSG00000101144/ENSG00000099954/ENSG00000164932/ENSG00000164741/ENSG00000083307/ENSG00000158055/ENSG00000138002/ENSG00000081479/ENSG00000184634/ENSG00000075891/ENSG00000196576/ENSG00000142875/ENSG00000182175/ENSG00000145423/ENSG00000176887/ENSG00000124766/ENSG00000204852/ENSG00000206557/ENSG00000122691	22
GO:0032835	glomerulus development	15/1884	63/20870	0.000385148	0.00911716	0.00750417	ENSG00000003402/ENSG00000143867/ENSG00000154188/ENSG00000091879/ENSG00000101144/ENSG00000272398/ENSG00000054598/ENSG00000273706/ENSG00000081189/ENSG00000115204/ENSG00000075891/ENSG00000134853/ENSG00000137573/ENSG00000118526/ENSG00000184937	15
GO:0071805	potassium ion transmembrane transport	37/1884	230/20870	0.000397871	0.00938211	0.00772225	ENSG00000145362/ENSG00000077522/ENSG00000177119/ENSG00000075673/ENSG00000163399/ENSG00000143153/ENSG00000157388/ENSG00000182533/ENSG00000135404/ENSG00000022267/ENSG00000182255/ENSG00000069424/ENSG00000170049/ENSG00000102057/ENSG00000180509/ENSG00000184611/ENSG00000120049/ENSG00000157551/ENSG00000121361/ENSG00000082482/ENSG00000171303/ENSG00000104783/ENSG00000117013/ENSG00000184709/ENSG00000162763…	37
GO:0060512	prostate gland morphogenesis	9/1884	27/20870	0.000406692	0.00948071	0.0078034	ENSG00000066468/ENSG00000114251/ENSG00000169083/ENSG00000101144/ENSG00000213145/ENSG00000091831/ENSG00000070193/ENSG00000164690/ENSG00000137573	9
GO:0061437	renal system vasculature development	9/1884	27/20870	0.000406692	0.00948071	0.0078034	ENSG00000003402/ENSG00000143867/ENSG00000154188/ENSG00000091879/ENSG00000101144/ENSG00000099250/ENSG00000134853/ENSG00000118526/ENSG00000184937	9
GO:0061440	kidney vasculature development	9/1884	27/20870	0.000406692	0.00948071	0.0078034	ENSG00000003402/ENSG00000143867/ENSG00000154188/ENSG00000091879/ENSG00000101144/ENSG00000099250/ENSG00000134853/ENSG00000118526/ENSG00000184937	9
GO:1904888	cranial skeletal system development	16/1884	70/20870	0.000409115	0.00950108	0.00782017	ENSG00000066468/ENSG00000171310/ENSG00000168036/ENSG00000115844/ENSG00000141543/ENSG00000106571/ENSG00000083307/ENSG00000105996/ENSG00000273706/ENSG00000184634/ENSG00000134853/ENSG00000124813/ENSG00000100625/ENSG00000166949/ENSG00000119699/ENSG00000122691	16
GO:0002076	osteoblast development	7/1884	17/20870	0.000416454	0.00963501	0.00793041	ENSG00000119042/ENSG00000242252/ENSG00000068024/ENSG00000105996/ENSG00000124813/ENSG00000164690/ENSG00000166949	7
GO:0042391	regulation of membrane potential	64/1884	464/20870	0.000420188	0.00964901	0.00794193	ENSG00000175866/ENSG00000145362/ENSG00000164850/ENSG00000146938/ENSG00000183044/ENSG00000097007/ENSG00000077522/ENSG00000141433/ENSG00000163399/ENSG00000143153/ENSG00000157388/ENSG00000182533/ENSG00000187094/ENSG00000168539/ENSG00000174343/ENSG00000198947/ENSG00000141543/ENSG00000114279/ENSG00000129682/ENSG00000102466/ENSG00000022267/ENSG00000102081/ENSG00000266964/ENSG00000204681/ENSG00000022355…	64
GO:0021675	nerve development	17/1884	77/20870	0.000422346	0.00964901	0.00794193	ENSG00000105997/ENSG00000176697/ENSG00000120093/ENSG00000118257/ENSG00000168036/ENSG00000100697/ENSG00000106571/ENSG00000016082/ENSG00000099250/ENSG00000225950/ENSG00000075891/ENSG00000165462/ENSG00000103449/ENSG00000100625/ENSG00000079215/ENSG00000140090/ENSG00000137573	17
GO:0022404	molting cycle process	19/1884	91/20870	0.000423354	0.00964901	0.00794193	ENSG00000052850/ENSG00000066468/ENSG00000114251/ENSG00000165240/ENSG00000168036/ENSG00000167968/ENSG00000158813/ENSG00000146648/ENSG00000070193/ENSG00000120370/ENSG00000116478/ENSG00000173083/ENSG00000122641/ENSG00000147383/ENSG00000137497/ENSG00000164690/ENSG00000125285/ENSG00000232810/ENSG00000169884	19
GO:0022405	hair cycle process	19/1884	91/20870	0.000423354	0.00964901	0.00794193	ENSG00000052850/ENSG00000066468/ENSG00000114251/ENSG00000165240/ENSG00000168036/ENSG00000167968/ENSG00000158813/ENSG00000146648/ENSG00000070193/ENSG00000120370/ENSG00000116478/ENSG00000173083/ENSG00000122641/ENSG00000147383/ENSG00000137497/ENSG00000164690/ENSG00000125285/ENSG00000232810/ENSG00000169884	19
GO:0010632	regulation of epithelial cell migration	47/1884	315/20870	0.000426454	0.00968366	0.00797045	ENSG00000179348/ENSG00000144711/ENSG00000118257/ENSG00000117707/ENSG00000114251/ENSG00000097007/ENSG00000163638/ENSG00000181790/ENSG00000135744/ENSG00000154188/ENSG00000091879/ENSG00000128917/ENSG00000115109/ENSG00000070193/ENSG00000114861/ENSG00000116717/ENSG00000030582/ENSG00000189403/ENSG00000106211/ENSG00000114378/ENSG00000119185/ENSG00000169057/ENSG00000081189/ENSG00000106511/ENSG00000105976…	47
GO:0008584	male gonad development	26/1884	143/20870	0.000428524	0.00969475	0.00797958	ENSG00000013619/ENSG00000114251/ENSG00000169083/ENSG00000150347/ENSG00000085224/ENSG00000153094/ENSG00000092758/ENSG00000044115/ENSG00000091831/ENSG00000187741/ENSG00000078399/ENSG00000122641/ENSG00000138039/ENSG00000081479/ENSG00000169297/ENSG00000176046/ENSG00000134853/ENSG00000123131/ENSG00000100918/ENSG00000145423/ENSG00000100625/ENSG00000129194/ENSG00000118526/ENSG00000088992/ENSG00000184937…	26
GO:0032535	regulation of cellular component size	58/1884	411/20870	0.000430194	0.00969677	0.00798124	ENSG00000175866/ENSG00000143032/ENSG00000176697/ENSG00000162946/ENSG00000167178/ENSG00000106683/ENSG00000012171/ENSG00000114251/ENSG00000097007/ENSG00000077522/ENSG00000115091/ENSG00000075340/ENSG00000177119/ENSG00000178301/ENSG00000165240/ENSG00000128298/ENSG00000188277/ENSG00000042493/ENSG00000077549/ENSG00000182533/ENSG00000163171/ENSG00000172725/ENSG00000055163/ENSG00000187323/ENSG00000162643…	58
GO:2000178	negative regulation of neural precursor cell proliferation	8/1884	22/20870	0.000437216	0.00981893	0.00808179	ENSG00000179348/ENSG00000007372/ENSG00000147100/ENSG00000114251/ENSG00000044115/ENSG00000112333/ENSG00000105894/ENSG00000148704	8
GO:0030198	extracellular matrix organization	51/1884	350/20870	0.00044061	0.00985905	0.00811481	ENSG00000168477/ENSG00000003402/ENSG00000187498/ENSG00000115318/ENSG00000097007/ENSG00000142303/ENSG00000151388/ENSG00000140470/ENSG00000145808/ENSG00000163638/ENSG00000135744/ENSG00000182718/ENSG00000165240/ENSG00000086062/ENSG00000091986/ENSG00000142871/ENSG00000118523/ENSG00000108821/ENSG00000049089/ENSG00000092758/ENSG00000138061/ENSG00000204580/ENSG00000197635/ENSG00000198759/ENSG00000164318…	51
GO:0030336	negative regulation of cell migration	54/1884	377/20870	0.000464917	0.0103651	0.00853135	ENSG00000185885/ENSG00000163638/ENSG00000181790/ENSG00000006831/ENSG00000091879/ENSG00000111348/ENSG00000166780/ENSG00000130303/ENSG00000134830/ENSG00000151882/ENSG00000143418/ENSG00000172725/ENSG00000161544/ENSG00000138061/ENSG00000164741/ENSG00000128917/ENSG00000162643/ENSG00000197635/ENSG00000113657/ENSG00000112679/ENSG00000116717/ENSG00000146535/ENSG00000189403/ENSG00000122592/ENSG00000182054…	54
GO:0030278	regulation of ossification	23/1884	121/20870	0.000469133	0.0104212	0.00857751	ENSG00000143867/ENSG00000114251/ENSG00000115170/ENSG00000177119/ENSG00000242252/ENSG00000101144/ENSG00000142871/ENSG00000131873/ENSG00000133116/ENSG00000081189/ENSG00000150051/ENSG00000188554/ENSG00000185630/ENSG00000105894/ENSG00000124813/ENSG00000166949/ENSG00000137834/ENSG00000176887/ENSG00000006128/ENSG00000119699/ENSG00000130529/ENSG00000122691/ENSG00000169884	23
GO:0062012	regulation of small molecule metabolic process	51/1884	351/20870	0.000471328	0.0104322	0.00858654	ENSG00000129993/ENSG00000164916/ENSG00000162676/ENSG00000164850/ENSG00000196639/ENSG00000117707/ENSG00000173208/ENSG00000076555/ENSG00000148926/ENSG00000084674/ENSG00000173918/ENSG00000082196/ENSG00000093010/ENSG00000110090/ENSG00000167986/ENSG00000050165/ENSG00000104901/ENSG00000139160/ENSG00000163586/ENSG00000071889/ENSG00000130600/ENSG00000068024/ENSG00000189403/ENSG00000167244/ENSG00000169047…	51
GO:0051492	regulation of stress fiber assembly	20/1884	99/20870	0.00047599	0.0104975	0.00864027	ENSG00000106683/ENSG00000097007/ENSG00000184009/ENSG00000047648/ENSG00000118523/ENSG00000103647/ENSG00000164741/ENSG00000119185/ENSG00000105976/ENSG00000099250/ENSG00000070087/ENSG00000144824/ENSG00000145675/ENSG00000089159/ENSG00000166949/ENSG00000120896/ENSG00000006128/ENSG00000119699/ENSG00000140416/ENSG00000158195	20
GO:0046546	development of primary male sexual characteristics	26/1884	144/20870	0.000478865	0.010523	0.0086613	ENSG00000013619/ENSG00000114251/ENSG00000169083/ENSG00000150347/ENSG00000085224/ENSG00000153094/ENSG00000092758/ENSG00000044115/ENSG00000091831/ENSG00000187741/ENSG00000078399/ENSG00000122641/ENSG00000138039/ENSG00000081479/ENSG00000169297/ENSG00000176046/ENSG00000134853/ENSG00000123131/ENSG00000100918/ENSG00000145423/ENSG00000100625/ENSG00000129194/ENSG00000118526/ENSG00000088992/ENSG00000184937…	26
GO:0000578	embryonic axis specification	11/1884	39/20870	0.00048862	0.0106338	0.00875248	ENSG00000114251/ENSG00000125931/ENSG00000168036/ENSG00000115109/ENSG00000175879/ENSG00000273706/ENSG00000179598/ENSG00000137834/ENSG00000164458/ENSG00000125084/ENSG00000184937	11
GO:0045923	positive regulation of fatty acid metabolic process	11/1884	39/20870	0.00048862	0.0106338	0.00875248	ENSG00000173208/ENSG00000110090/ENSG00000163586/ENSG00000169047/ENSG00000123684/ENSG00000165175/ENSG00000199158/ENSG00000009950/ENSG00000175701/ENSG00000132170/ENSG00000122691	11
GO:0060349	bone morphogenesis	19/1884	92/20870	0.000489109	0.0106338	0.00875248	ENSG00000105880/ENSG00000066468/ENSG00000163132/ENSG00000162551/ENSG00000104331/ENSG00000131873/ENSG00000108821/ENSG00000054598/ENSG00000106571/ENSG00000081189/ENSG00000124813/ENSG00000145423/ENSG00000168779/ENSG00000103056/ENSG00000159167/ENSG00000119699/ENSG00000111199/ENSG00000182704/ENSG00000122691	19
GO:0048332	mesoderm morphogenesis	18/1884	85/20870	0.00049616	0.010749	0.00884727	ENSG00000066468/ENSG00000198431/ENSG00000114251/ENSG00000115170/ENSG00000101144/ENSG00000115109/ENSG00000054598/ENSG00000103241/ENSG00000113196/ENSG00000149948/ENSG00000122641/ENSG00000207713/ENSG00000075891/ENSG00000145423/ENSG00000166949/ENSG00000164458/ENSG00000204610/ENSG00000128791	18
GO:0044262	cellular carbohydrate metabolic process	44/1884	292/20870	0.000517437	0.0111705	0.0091942	ENSG00000129993/ENSG00000147408/ENSG00000164916/ENSG00000164850/ENSG00000196639/ENSG00000076555/ENSG00000086062/ENSG00000104331/ENSG00000173918/ENSG00000082196/ENSG00000167986/ENSG00000071889/ENSG00000198814/ENSG00000068024/ENSG00000189403/ENSG00000182054/ENSG00000148057/ENSG00000167244/ENSG00000068383/ENSG00000204084/ENSG00000169047/ENSG00000138030/ENSG00000174697/ENSG00000138039/ENSG00000169057…	44
GO:0071696	ectodermal placode development	6/1884	13/20870	0.00052718	0.0112227	0.0092372	ENSG00000117707/ENSG00000168036/ENSG00000158813/ENSG00000116478/ENSG00000099250/ENSG00000100625	6
GO:0072182	regulation of nephron tubule epithelial cell differentiation	6/1884	13/20870	0.00052718	0.0112227	0.0092372	ENSG00000143867/ENSG00000272398/ENSG00000168036/ENSG00000273706/ENSG00000075891/ENSG00000125618	6
GO:0097154	GABAergic neuron differentiation	6/1884	13/20870	0.00052718	0.0112227	0.0092372	ENSG00000179348/ENSG00000004848/ENSG00000115844/ENSG00000153266/ENSG00000122641/ENSG00000106852	6
GO:1990403	embryonic brain development	6/1884	13/20870	0.00052718	0.0112227	0.0092372	ENSG00000163064/ENSG00000168036/ENSG00000184634/ENSG00000147403/ENSG00000036054/ENSG00000125084	6
GO:0071774	response to fibroblast growth factor	23/1884	122/20870	0.000529615	0.0112355	0.00924777	ENSG00000066468/ENSG00000114251/ENSG00000171388/ENSG00000036828/ENSG00000118523/ENSG00000108821/ENSG00000168036/ENSG00000128917/ENSG00000133059/ENSG00000126767/ENSG00000070193/ENSG00000114279/ENSG00000186895/ENSG00000126500/ENSG00000114378/ENSG00000119185/ENSG00000133116/ENSG00000273706/ENSG00000284231/ENSG00000124813/ENSG00000112562/ENSG00000137573/ENSG00000206557	23
GO:1901379	regulation of potassium ion transmembrane transport	20/1884	100/20870	0.000545343	0.0115293	0.00948957	ENSG00000145362/ENSG00000077522/ENSG00000177119/ENSG00000143153/ENSG00000157388/ENSG00000182533/ENSG00000135404/ENSG00000022267/ENSG00000069424/ENSG00000170049/ENSG00000180509/ENSG00000120049/ENSG00000104783/ENSG00000184709/ENSG00000162763/ENSG00000069869/ENSG00000049759/ENSG00000117152/ENSG00000158286/ENSG00000126562	20
GO:0072202	cell differentiation involved in metanephros development	9/1884	28/20870	0.000551685	0.0116008	0.0095484	ENSG00000143867/ENSG00000125931/ENSG00000168036/ENSG00000168621/ENSG00000075891/ENSG00000125618/ENSG00000198914/ENSG00000103449/ENSG00000118526	9
GO:0009895	negative regulation of catabolic process	53/1884	371/20870	0.000556041	0.0116008	0.0095484	ENSG00000129993/ENSG00000164916/ENSG00000159217/ENSG00000076555/ENSG00000181790/ENSG00000182718/ENSG00000178301/ENSG00000204463/ENSG00000152430/ENSG00000176194/ENSG00000099622/ENSG00000038532/ENSG00000130826/ENSG00000146648/ENSG00000147677/ENSG00000114867/ENSG00000139160/ENSG00000149557/ENSG00000102081/ENSG00000140564/ENSG00000168621/ENSG00000068024/ENSG00000263528/ENSG00000125337/ENSG00000174697…	53
GO:0070482	response to oxygen levels	53/1884	371/20870	0.000556041	0.0116008	0.0095484	ENSG00000129993/ENSG00000003402/ENSG00000183044/ENSG00000148926/ENSG00000156709/ENSG00000108602/ENSG00000091879/ENSG00000143153/ENSG00000071553/ENSG00000114573/ENSG00000165240/ENSG00000101144/ENSG00000036828/ENSG00000121691/ENSG00000118523/ENSG00000272398/ENSG00000108821/ENSG00000161544/ENSG00000140465/ENSG00000197635/ENSG00000129521/ENSG00000116016/ENSG00000057593/ENSG00000163586/ENSG00000116478…	53
GO:0090092	regulation of transmembrane receptor protein serine/threonine kinase signaling pathway	42/1884	276/20870	0.000558064	0.0116008	0.0095484	ENSG00000163132/ENSG00000114251/ENSG00000097007/ENSG00000115170/ENSG00000101144/ENSG00000182533/ENSG00000142871/ENSG00000171310/ENSG00000176194/ENSG00000125931/ENSG00000050165/ENSG00000070193/ENSG00000156466/ENSG00000147257/ENSG00000204389/ENSG00000144730/ENSG00000122641/ENSG00000163083/ENSG00000081479/ENSG00000158747/ENSG00000174004/ENSG00000137497/ENSG00000169856/ENSG00000124225/ENSG00000132170…	42
GO:0030324	lung development	32/1884	193/20870	0.000558185	0.0116008	0.0095484	ENSG00000066468/ENSG00000115318/ENSG00000117707/ENSG00000137868/ENSG00000114251/ENSG00000165240/ENSG00000204463/ENSG00000118523/ENSG00000168036/ENSG00000146648/ENSG00000126767/ENSG00000116016/ENSG00000070193/ENSG00000103241/ENSG00000106571/ENSG00000147257/ENSG00000083307/ENSG00000189403/ENSG00000171476/ENSG00000133703/ENSG00000134853/ENSG00000162493/ENSG00000105894/ENSG00000164690/ENSG00000103056…	32
GO:0021545	cranial nerve development	13/1884	52/20870	0.000562188	0.0116328	0.00957477	ENSG00000105997/ENSG00000120093/ENSG00000118257/ENSG00000168036/ENSG00000106571/ENSG00000016082/ENSG00000099250/ENSG00000075891/ENSG00000165462/ENSG00000103449/ENSG00000100625/ENSG00000079215/ENSG00000140090	13
GO:0098773	skin epidermis development	19/1884	93/20870	0.000563521	0.0116328	0.00957477	ENSG00000052850/ENSG00000066468/ENSG00000114251/ENSG00000165240/ENSG00000168036/ENSG00000167968/ENSG00000158813/ENSG00000146648/ENSG00000070193/ENSG00000120370/ENSG00000116478/ENSG00000173083/ENSG00000122641/ENSG00000147383/ENSG00000137497/ENSG00000164690/ENSG00000125285/ENSG00000232810/ENSG00000169884	19
GO:0045229	external encapsulating structure organization	51/1884	354/20870	0.00057531	0.0117984	0.00971104	ENSG00000168477/ENSG00000003402/ENSG00000187498/ENSG00000115318/ENSG00000097007/ENSG00000142303/ENSG00000151388/ENSG00000140470/ENSG00000145808/ENSG00000163638/ENSG00000135744/ENSG00000182718/ENSG00000165240/ENSG00000086062/ENSG00000091986/ENSG00000142871/ENSG00000118523/ENSG00000108821/ENSG00000049089/ENSG00000092758/ENSG00000138061/ENSG00000204580/ENSG00000197635/ENSG00000198759/ENSG00000164318…	51
GO:0061053	somite development	18/1884	86/20870	0.00057539	0.0117984	0.00971104	ENSG00000115318/ENSG00000114251/ENSG00000090932/ENSG00000173253/ENSG00000115109/ENSG00000054598/ENSG00000103241/ENSG00000273706/ENSG00000184634/ENSG00000106511/ENSG00000169071/ENSG00000145423/ENSG00000164690/ENSG00000100625/ENSG00000166949/ENSG00000176887/ENSG00000164458/ENSG00000125084	18
GO:0051146	striated muscle cell differentiation	46/1884	311/20870	0.000591307	0.0120844	0.00994641	ENSG00000068650/ENSG00000178209/ENSG00000176697/ENSG00000003402/ENSG00000163132/ENSG00000117707/ENSG00000184009/ENSG00000077522/ENSG00000115170/ENSG00000181790/ENSG00000135744/ENSG00000057663/ENSG00000116161/ENSG00000182533/ENSG00000100211/ENSG00000159176/ENSG00000104936/ENSG00000167196/ENSG00000115641/ENSG00000137312/ENSG00000160211/ENSG00000068024/ENSG00000171476/ENSG00000167244/ENSG00000177508…	46
GO:0001974	blood vessel remodeling	12/1884	46/20870	0.000600298	0.0122273	0.0100641	ENSG00000105997/ENSG00000135744/ENSG00000057663/ENSG00000165240/ENSG00000182492/ENSG00000128917/ENSG00000116016/ENSG00000070193/ENSG00000054598/ENSG00000081189/ENSG00000284182/ENSG00000135926	12
GO:0035115	embryonic forelimb morphogenesis	10/1884	34/20870	0.000608144	0.0123054	0.0101283	ENSG00000163064/ENSG00000052850/ENSG00000163132/ENSG00000143867/ENSG00000168036/ENSG00000078399/ENSG00000124813/ENSG00000164690/ENSG00000168779/ENSG00000122691	10
GO:0046320	regulation of fatty acid oxidation	10/1884	34/20870	0.000608144	0.0123054	0.0101283	ENSG00000173208/ENSG00000076555/ENSG00000110090/ENSG00000139160/ENSG00000163586/ENSG00000169047/ENSG00000102910/ENSG00000168389/ENSG00000175701/ENSG00000122691	10
GO:0002052	positive regulation of neuroblast proliferation	8/1884	23/20870	0.000617671	0.0124136	0.0102174	ENSG00000162946/ENSG00000007372/ENSG00000168036/ENSG00000142700/ENSG00000176165/ENSG00000106571/ENSG00000171540/ENSG00000164690	8
GO:0021884	forebrain neuron development	8/1884	23/20870	0.000617671	0.0124136	0.0102174	ENSG00000162946/ENSG00000066468/ENSG00000118257/ENSG00000165240/ENSG00000176165/ENSG00000168505/ENSG00000106852/ENSG00000099250	8
GO:1905332	positive regulation of morphogenesis of an epithelium	11/1884	40/20870	0.000619566	0.0124136	0.0102174	ENSG00000097007/ENSG00000135744/ENSG00000169083/ENSG00000168036/ENSG00000168621/ENSG00000260027/ENSG00000179528/ENSG00000273706/ENSG00000075891/ENSG00000125618/ENSG00000100625	11
GO:0033273	response to vitamin	19/1884	94/20870	0.00064751	0.0129312	0.0106435	ENSG00000162551/ENSG00000242252/ENSG00000101144/ENSG00000036828/ENSG00000121691/ENSG00000129355/ENSG00000108821/ENSG00000140465/ENSG00000146648/ENSG00000057593/ENSG00000182511/ENSG00000174697/ENSG00000131711/ENSG00000170430/ENSG00000133027/ENSG00000105894/ENSG00000159167/ENSG00000113739/ENSG00000100300	19
GO:0051963	regulation of synapse assembly	21/1884	109/20870	0.000674901	0.013391	0.0110219	ENSG00000176697/ENSG00000114251/ENSG00000181790/ENSG00000188157/ENSG00000286237/ENSG00000198908/ENSG00000114867/ENSG00000182580/ENSG00000183098/ENSG00000158301/ENSG00000189108/ENSG00000198739/ENSG00000166159/ENSG00000081189/ENSG00000179915/ENSG00000124839/ENSG00000185008/ENSG00000100625/ENSG00000185985/ENSG00000179542/ENSG00000102359	21
GO:0090263	positive regulation of canonical Wnt signaling pathway	21/1884	109/20870	0.000674901	0.013391	0.0110219	ENSG00000105880/ENSG00000066468/ENSG00000101849/ENSG00000184675/ENSG00000182220/ENSG00000108821/ENSG00000169118/ENSG00000158813/ENSG00000146648/ENSG00000189319/ENSG00000070193/ENSG00000147257/ENSG00000107104/ENSG00000100614/ENSG00000169071/ENSG00000145423/ENSG00000166949/ENSG00000124766/ENSG00000130529/ENSG00000169884/ENSG00000101966	21
GO:0030902	hindbrain development	28/1884	163/20870	0.000680018	0.0134111	0.0110384	ENSG00000163064/ENSG00000180613/ENSG00000179348/ENSG00000120093/ENSG00000162761/ENSG00000146938/ENSG00000115507/ENSG00000117707/ENSG00000183044/ENSG00000097007/ENSG00000135541/ENSG00000165240/ENSG00000101144/ENSG00000018236/ENSG00000168036/ENSG00000164741/ENSG00000054598/ENSG00000168505/ENSG00000170075/ENSG00000105996/ENSG00000273706/ENSG00000169057/ENSG00000079482/ENSG00000165462/ENSG00000105894…	28
GO:0071772	response to BMP	29/1884	171/20870	0.000682474	0.0134111	0.0110384	ENSG00000105880/ENSG00000163132/ENSG00000114251/ENSG00000097007/ENSG00000115170/ENSG00000151388/ENSG00000101144/ENSG00000142871/ENSG00000108654/ENSG00000156466/ENSG00000147257/ENSG00000081479/ENSG00000158747/ENSG00000137497/ENSG00000132170/ENSG00000182175/ENSG00000169071/ENSG00000124813/ENSG00000145423/ENSG00000166949/ENSG00000137834/ENSG00000103056/ENSG00000176887/ENSG00000137573/ENSG00000119699…	29
GO:0071773	cellular response to BMP stimulus	29/1884	171/20870	0.000682474	0.0134111	0.0110384	ENSG00000105880/ENSG00000163132/ENSG00000114251/ENSG00000097007/ENSG00000115170/ENSG00000151388/ENSG00000101144/ENSG00000142871/ENSG00000108654/ENSG00000156466/ENSG00000147257/ENSG00000081479/ENSG00000158747/ENSG00000137497/ENSG00000132170/ENSG00000182175/ENSG00000169071/ENSG00000124813/ENSG00000145423/ENSG00000166949/ENSG00000137834/ENSG00000103056/ENSG00000176887/ENSG00000137573/ENSG00000119699…	29
GO:0008016	regulation of heart contraction	34/1884	212/20870	0.000707201	0.0138526	0.0114018	ENSG00000145362/ENSG00000148926/ENSG00000135744/ENSG00000171388/ENSG00000163399/ENSG00000143153/ENSG00000157388/ENSG00000182533/ENSG00000118523/ENSG00000198947/ENSG00000104936/ENSG00000116016/ENSG00000129682/ENSG00000266964/ENSG00000068024/ENSG00000171476/ENSG00000177508/ENSG00000016082/ENSG00000180509/ENSG00000120049/ENSG00000207713/ENSG00000113448/ENSG00000116741/ENSG00000117152/ENSG00000158286…	34
GO:0042303	molting cycle	22/1884	117/20870	0.000718288	0.0139804	0.011507	ENSG00000052850/ENSG00000066468/ENSG00000114251/ENSG00000165240/ENSG00000168036/ENSG00000167968/ENSG00000158813/ENSG00000146648/ENSG00000070193/ENSG00000120370/ENSG00000116478/ENSG00000173083/ENSG00000122641/ENSG00000147383/ENSG00000137497/ENSG00000164690/ENSG00000182004/ENSG00000125285/ENSG00000232810/ENSG00000167723/ENSG00000182704/ENSG00000169884	22
GO:0042633	hair cycle	22/1884	117/20870	0.000718288	0.0139804	0.011507	ENSG00000052850/ENSG00000066468/ENSG00000114251/ENSG00000165240/ENSG00000168036/ENSG00000167968/ENSG00000158813/ENSG00000146648/ENSG00000070193/ENSG00000120370/ENSG00000116478/ENSG00000173083/ENSG00000122641/ENSG00000147383/ENSG00000137497/ENSG00000164690/ENSG00000182004/ENSG00000125285/ENSG00000232810/ENSG00000167723/ENSG00000182704/ENSG00000169884	22
GO:0010721	negative regulation of cell development	33/1884	204/20870	0.000720976	0.0139883	0.0115135	ENSG00000007372/ENSG00000012171/ENSG00000114251/ENSG00000141433/ENSG00000101144/ENSG00000182533/ENSG00000143418/ENSG00000044115/ENSG00000168036/ENSG00000187323/ENSG00000100697/ENSG00000090932/ENSG00000115844/ENSG00000146425/ENSG00000129682/ENSG00000203879/ENSG00000170075/ENSG00000125968/ENSG00000182054/ENSG00000119185/ENSG00000107104/ENSG00000112333/ENSG00000099250/ENSG00000105894/ENSG00000182175…	33
GO:2000146	negative regulation of cell motility	55/1884	393/20870	0.000729328	0.0141057	0.0116101	ENSG00000185885/ENSG00000163638/ENSG00000181790/ENSG00000006831/ENSG00000091879/ENSG00000111348/ENSG00000166780/ENSG00000130303/ENSG00000134830/ENSG00000151882/ENSG00000143418/ENSG00000172725/ENSG00000044115/ENSG00000161544/ENSG00000138061/ENSG00000164741/ENSG00000128917/ENSG00000162643/ENSG00000197635/ENSG00000113657/ENSG00000112679/ENSG00000116717/ENSG00000146535/ENSG00000189403/ENSG00000122592…	55
GO:0010952	positive regulation of peptidase activity	36/1884	229/20870	0.000732666	0.0141092	0.0116131	ENSG00000003402/ENSG00000164850/ENSG00000197971/ENSG00000156709/ENSG00000117362/ENSG00000138613/ENSG00000185825/ENSG00000153094/ENSG00000259571/ENSG00000118412/ENSG00000187094/ENSG00000142871/ENSG00000118523/ENSG00000055163/ENSG00000196730/ENSG00000164741/ENSG00000143590/ENSG00000129521/ENSG00000181104/ENSG00000183770/ENSG00000030582/ENSG00000148180/ENSG00000189403/ENSG00000162711/ENSG00000073921…	36
GO:0021772	olfactory bulb development	9/1884	29/20870	0.000736415	0.0141092	0.0116131	ENSG00000180613/ENSG00000105880/ENSG00000114251/ENSG00000004848/ENSG00000115844/ENSG00000128610/ENSG00000112333/ENSG00000185008/ENSG00000103449	9
GO:0060325	face morphogenesis	9/1884	29/20870	0.000736415	0.0141092	0.0116131	ENSG00000198807/ENSG00000105880/ENSG00000163132/ENSG00000137868/ENSG00000167522/ENSG00000150347/ENSG00000108821/ENSG00000134853/ENSG00000119699	9
GO:0010811	positive regulation of cell-substrate adhesion	23/1884	125/20870	0.000753652	0.0143945	0.0118479	ENSG00000162946/ENSG00000097007/ENSG00000102606/ENSG00000091986/ENSG00000151882/ENSG00000142871/ENSG00000105810/ENSG00000198759/ENSG00000164318/ENSG00000115109/ENSG00000103241/ENSG00000119185/ENSG00000179820/ENSG00000111859/ENSG00000099250/ENSG00000067606/ENSG00000105894/ENSG00000132669/ENSG00000148484/ENSG00000166949/ENSG00000107742/ENSG00000154096/ENSG00000188730	23
GO:0050679	positive regulation of epithelial cell proliferation	34/1884	213/20870	0.000770103	0.0146402	0.0120501	ENSG00000003402/ENSG00000105880/ENSG00000066468/ENSG00000179348/ENSG00000118257/ENSG00000143867/ENSG00000117707/ENSG00000114251/ENSG00000232040/ENSG00000171388/ENSG00000169083/ENSG00000165240/ENSG00000086062/ENSG00000134830/ENSG00000168036/ENSG00000006377/ENSG00000146648/ENSG00000070193/ENSG00000030582/ENSG00000189403/ENSG00000114378/ENSG00000125968/ENSG00000167244/ENSG00000284038/ENSG00000207744…	34
GO:0032233	positive regulation of actin filament bundle assembly	15/1884	67/20870	0.000773484	0.0146402	0.0120501	ENSG00000106683/ENSG00000097007/ENSG00000118523/ENSG00000125968/ENSG00000119185/ENSG00000099250/ENSG00000070087/ENSG00000089159/ENSG00000166949/ENSG00000120896/ENSG00000133789/ENSG00000172403/ENSG00000006128/ENSG00000119699/ENSG00000140416	15
GO:0030501	positive regulation of bone mineralization	11/1884	41/20870	0.000778462	0.0146402	0.0120501	ENSG00000143867/ENSG00000115170/ENSG00000177119/ENSG00000101144/ENSG00000142871/ENSG00000133116/ENSG00000081189/ENSG00000105894/ENSG00000166949/ENSG00000119699/ENSG00000169884	11
GO:0006813	potassium ion transport	39/1884	255/20870	0.000780866	0.0146402	0.0120501	ENSG00000145362/ENSG00000077522/ENSG00000141433/ENSG00000177119/ENSG00000075673/ENSG00000163399/ENSG00000143153/ENSG00000157388/ENSG00000182533/ENSG00000135404/ENSG00000022267/ENSG00000266964/ENSG00000182255/ENSG00000069424/ENSG00000170049/ENSG00000102057/ENSG00000180509/ENSG00000184611/ENSG00000120049/ENSG00000157551/ENSG00000121361/ENSG00000082482/ENSG00000171303/ENSG00000104783/ENSG00000117013…	39
GO:0022612	gland morphogenesis	24/1884	133/20870	0.000781411	0.0146402	0.0120501	ENSG00000003402/ENSG00000066468/ENSG00000007372/ENSG00000117707/ENSG00000114251/ENSG00000169083/ENSG00000101144/ENSG00000182533/ENSG00000213145/ENSG00000204580/ENSG00000158813/ENSG00000163435/ENSG00000091831/ENSG00000070193/ENSG00000106571/ENSG00000119919/ENSG00000099250/ENSG00000140464/ENSG00000105894/ENSG00000164690/ENSG00000137573/ENSG00000119699/ENSG00000232810/ENSG00000128791	24
GO:0006308	DNA catabolic process	10/1884	35/20870	0.000783229	0.0146402	0.0120501	ENSG00000156709/ENSG00000099954/ENSG00000176194/ENSG00000100697/ENSG00000013563/ENSG00000167968/ENSG00000163687/ENSG00000183770/ENSG00000213689/ENSG00000183479	10
GO:0060323	head morphogenesis	10/1884	35/20870	0.000783229	0.0146402	0.0120501	ENSG00000198807/ENSG00000105880/ENSG00000163132/ENSG00000137868/ENSG00000167522/ENSG00000150347/ENSG00000182220/ENSG00000108821/ENSG00000134853/ENSG00000119699	10
GO:0030330	DNA damage response, signal transduction by p53 class mediator	16/1884	74/20870	0.000786097	0.0146491	0.0120574	ENSG00000163132/ENSG00000085224/ENSG00000108654/ENSG00000177374/ENSG00000172977/ENSG00000145632/ENSG00000173846/ENSG00000140464/ENSG00000183255/ENSG00000185088/ENSG00000072133/ENSG00000124766/ENSG00000067066/ENSG00000198369/ENSG00000122691/ENSG00000161642	16
GO:0030323	respiratory tube development	32/1884	197/20870	0.000800678	0.0148756	0.0122439	ENSG00000066468/ENSG00000115318/ENSG00000117707/ENSG00000137868/ENSG00000114251/ENSG00000165240/ENSG00000204463/ENSG00000118523/ENSG00000168036/ENSG00000146648/ENSG00000126767/ENSG00000116016/ENSG00000070193/ENSG00000103241/ENSG00000106571/ENSG00000147257/ENSG00000083307/ENSG00000189403/ENSG00000171476/ENSG00000133703/ENSG00000134853/ENSG00000162493/ENSG00000105894/ENSG00000164690/ENSG00000103056…	32
GO:0010001	glial cell differentiation	38/1884	247/20870	0.00080827	0.0149713	0.0123226	ENSG00000180613/ENSG00000178209/ENSG00000162576/ENSG00000007372/ENSG00000152784/ENSG00000078900/ENSG00000097007/ENSG00000112414/ENSG00000105810/ENSG00000168036/ENSG00000100697/ENSG00000115844/ENSG00000135144/ENSG00000146648/ENSG00000070193/ENSG00000106571/ENSG00000180758/ENSG00000170075/ENSG00000030582/ENSG00000116478/ENSG00000163517/ENSG00000157368/ENSG00000133703/ENSG00000153902/ENSG00000184634…	38
GO:0060078	regulation of postsynaptic membrane potential	26/1884	149/20870	0.000816336	0.0150752	0.0124081	ENSG00000175866/ENSG00000146938/ENSG00000183044/ENSG00000141433/ENSG00000168539/ENSG00000174343/ENSG00000141543/ENSG00000102466/ENSG00000204681/ENSG00000022355/ENSG00000102287/ENSG00000182256/ENSG00000146276/ENSG00000155511/ENSG00000171189/ENSG00000164418/ENSG00000149403/ENSG00000169057/ENSG00000081189/ENSG00000179915/ENSG00000067606/ENSG00000117152/ENSG00000112759/ENSG00000084112/ENSG00000149582…	26
GO:0050770	regulation of axonogenesis	28/1884	165/20870	0.000827959	0.0152439	0.012547	ENSG00000176697/ENSG00000162946/ENSG00000167178/ENSG00000106683/ENSG00000012171/ENSG00000114251/ENSG00000174672/ENSG00000187323/ENSG00000171587/ENSG00000182580/ENSG00000129682/ENSG00000203879/ENSG00000131711/ENSG00000072518/ENSG00000099250/ENSG00000077264/ENSG00000196576/ENSG00000151615/ENSG00000182175/ENSG00000185008/ENSG00000170381/ENSG00000082684/ENSG00000143434/ENSG00000168779/ENSG00000187164…	28
GO:0030282	bone mineralization	23/1884	126/20870	0.000844686	0.0155053	0.0127621	ENSG00000066468/ENSG00000143867/ENSG00000115170/ENSG00000177119/ENSG00000242252/ENSG00000101144/ENSG00000142871/ENSG00000000938/ENSG00000147257/ENSG00000133116/ENSG00000174697/ENSG00000081189/ENSG00000188554/ENSG00000105894/ENSG00000169071/ENSG00000185052/ENSG00000166949/ENSG00000103056/ENSG00000086300/ENSG00000119699/ENSG00000130529/ENSG00000122691/ENSG00000169884	23
GO:0051956	negative regulation of amino acid transport	6/1884	14/20870	0.000852274	0.0155781	0.012822	ENSG00000183044/ENSG00000174697/ENSG00000116741/ENSG00000117152/ENSG00000149150/ENSG00000170893	6
GO:0030539	male genitalia development	8/1884	24/20870	0.000853733	0.0155781	0.012822	ENSG00000169083/ENSG00000168036/ENSG00000070193/ENSG00000138039/ENSG00000134853/ENSG00000169071/ENSG00000164690/ENSG00000184937	8
GO:0007422	peripheral nervous system development	17/1884	82/20870	0.00090575	0.0164295	0.0135228	ENSG00000178209/ENSG00000176697/ENSG00000181790/ENSG00000112414/ENSG00000100697/ENSG00000006468/ENSG00000168621/ENSG00000146013/ENSG00000164107/ENSG00000128710/ENSG00000016082/ENSG00000159556/ENSG00000153902/ENSG00000184634/ENSG00000225950/ENSG00000159216/ENSG00000142168	17
GO:0009791	post-embryonic development	17/1884	82/20870	0.00090575	0.0164295	0.0135228	ENSG00000052850/ENSG00000066468/ENSG00000097007/ENSG00000084674/ENSG00000150347/ENSG00000116539/ENSG00000085224/ENSG00000153094/ENSG00000104331/ENSG00000171310/ENSG00000171587/ENSG00000205581/ENSG00000273706/ENSG00000169057/ENSG00000119919/ENSG00000153234/ENSG00000057657	17
GO:0010812	negative regulation of cell-substrate adhesion	16/1884	75/20870	0.000916898	0.0165559	0.0136269	ENSG00000141556/ENSG00000091879/ENSG00000047648/ENSG00000113916/ENSG00000147044/ENSG00000108821/ENSG00000103647/ENSG00000164741/ENSG00000112679/ENSG00000122592/ENSG00000119185/ENSG00000107104/ENSG00000144824/ENSG00000145675/ENSG00000170381/ENSG00000125084	16
GO:0060039	pericardium development	7/1884	19/20870	0.000918123	0.0165559	0.0136269	ENSG00000114251/ENSG00000101144/ENSG00000136280/ENSG00000128917/ENSG00000164107/ENSG00000166949/ENSG00000184937	7
GO:0055074	calcium ion homeostasis	65/1884	488/20870	0.000964949	0.0173493	0.0142799	ENSG00000145362/ENSG00000162946/ENSG00000179348/ENSG00000164850/ENSG00000185989/ENSG00000114251/ENSG00000097007/ENSG00000143322/ENSG00000141433/ENSG00000148926/ENSG00000135744/ENSG00000057663/ENSG00000143153/ENSG00000185825/ENSG00000131943/ENSG00000173918/ENSG00000134830/ENSG00000036828/ENSG00000182533/ENSG00000151882/ENSG00000272398/ENSG00000174343/ENSG00000180871/ENSG00000131504/ENSG00000198947…	65
GO:0007616	long-term memory	11/1884	42/20870	0.000969718	0.0173666	0.0142941	ENSG00000164742/ENSG00000118971/ENSG00000107864/ENSG00000155511/ENSG00000169057/ENSG00000225950/ENSG00000067606/ENSG00000165186/ENSG00000169220/ENSG00000181856/ENSG00000006128	11
GO:0043244	regulation of protein-containing complex disassembly	24/1884	135/20870	0.000971578	0.0173666	0.0142941	ENSG00000077522/ENSG00000075340/ENSG00000166780/ENSG00000042493/ENSG00000077549/ENSG00000038532/ENSG00000132507/ENSG00000129682/ENSG00000148180/ENSG00000140443/ENSG00000140854/ENSG00000131711/ENSG00000130479/ENSG00000165175/ENSG00000121879/ENSG00000006747/ENSG00000115306/ENSG00000137877/ENSG00000197321/ENSG00000133789/ENSG00000068354/ENSG00000232810/ENSG00000111199/ENSG00000160803	24
GO:0001701	in utero embryonic development	55/1884	398/20870	0.000983945	0.0175365	0.014434	ENSG00000068650/ENSG00000167693/ENSG00000066468/ENSG00000179348/ENSG00000163132/ENSG00000115170/ENSG00000162104/ENSG00000148926/ENSG00000111254/ENSG00000154188/ENSG00000084674/ENSG00000169083/ENSG00000165240/ENSG00000153094/ENSG00000101144/ENSG00000136280/ENSG00000142871/ENSG00000100814/ENSG00000171310/ENSG00000125931/ENSG00000153815/ENSG00000168036/ENSG00000129562/ENSG00000163435/ENSG00000116016…	55
GO:0050878	regulation of body fluid levels	58/1884	425/20870	0.00098873	0.0175707	0.0144622	ENSG00000178209/ENSG00000114353/ENSG00000183044/ENSG00000184009/ENSG00000148926/ENSG00000177119/ENSG00000182718/ENSG00000171388/ENSG00000167580/ENSG00000057663/ENSG00000165240/ENSG00000173918/ENSG00000168539/ENSG00000103647/ENSG00000159176/ENSG00000204580/ENSG00000065357/ENSG00000102780/ENSG00000274588/ENSG00000149091/ENSG00000102967/ENSG00000146648/ENSG00000181104/ENSG00000127533/ENSG00000057593…	58
GO:0043280	positive regulation of cysteine-type endopeptidase activity involved in apoptotic process	26/1884	151/20870	0.0010006	0.0177303	0.0145935	ENSG00000003402/ENSG00000164850/ENSG00000156709/ENSG00000185825/ENSG00000153094/ENSG00000259571/ENSG00000118412/ENSG00000187094/ENSG00000142871/ENSG00000118523/ENSG00000196730/ENSG00000164741/ENSG00000129521/ENSG00000181104/ENSG00000183770/ENSG00000148180/ENSG00000189403/ENSG00000162711/ENSG00000140464/ENSG00000132170/ENSG00000185088/ENSG00000079387/ENSG00000166949/ENSG00000171056/ENSG00000232810…	26
GO:1901879	regulation of protein depolymerization	18/1884	90/20870	0.00101074	0.0177759	0.014631	ENSG00000077522/ENSG00000075340/ENSG00000166780/ENSG00000042493/ENSG00000077549/ENSG00000129682/ENSG00000148180/ENSG00000140854/ENSG00000131711/ENSG00000130479/ENSG00000165175/ENSG00000121879/ENSG00000006747/ENSG00000115306/ENSG00000137877/ENSG00000197321/ENSG00000133789/ENSG00000111199	18
GO:0007440	foregut morphogenesis	5/1884	10/20870	0.00101979	0.0177759	0.014631	ENSG00000168036/ENSG00000115109/ENSG00000103241/ENSG00000164690/ENSG00000166949	5
GO:0021903	rostrocaudal neural tube patterning	5/1884	10/20870	0.00101979	0.0177759	0.014631	ENSG00000163064/ENSG00000007372/ENSG00000182220/ENSG00000168505/ENSG00000125084	5
GO:0060272	embryonic skeletal joint morphogenesis	5/1884	10/20870	0.00101979	0.0177759	0.014631	ENSG00000143867/ENSG00000101144/ENSG00000168036/ENSG00000114378/ENSG00000168779	5
GO:0072203	cell proliferation involved in metanephros development	5/1884	10/20870	0.00101979	0.0177759	0.014631	ENSG00000143867/ENSG00000101144/ENSG00000147257/ENSG00000164690/ENSG00000184937	5
GO:1901890	positive regulation of cell junction assembly	22/1884	120/20870	0.00102057	0.0177759	0.014631	ENSG00000176697/ENSG00000097007/ENSG00000181790/ENSG00000188157/ENSG00000135744/ENSG00000286237/ENSG00000198908/ENSG00000115109/ENSG00000182580/ENSG00000137312/ENSG00000158301/ENSG00000177508/ENSG00000119185/ENSG00000198739/ENSG00000166159/ENSG00000099250/ENSG00000179915/ENSG00000185985/ENSG00000179542/ENSG00000166949/ENSG00000102359/ENSG00000154096	22
GO:0048545	response to steroid hormone	52/1884	372/20870	0.00102858	0.0178647	0.0147041	ENSG00000048540/ENSG00000003402/ENSG00000164850/ENSG00000023839/ENSG00000141433/ENSG00000148926/ENSG00000172482/ENSG00000156709/ENSG00000108602/ENSG00000162551/ENSG00000169083/ENSG00000163399/ENSG00000153094/ENSG00000242252/ENSG00000101144/ENSG00000104267/ENSG00000118523/ENSG00000108821/ENSG00000204209/ENSG00000108654/ENSG00000146648/ENSG00000091831/ENSG00000196482/ENSG00000176971/ENSG00000114861…	52
GO:0030522	intracellular receptor signaling pathway	44/1884	302/20870	0.00105035	0.0181912	0.0149728	ENSG00000048540/ENSG00000164850/ENSG00000204388/ENSG00000169083/ENSG00000023445/ENSG00000175029/ENSG00000187553/ENSG00000204209/ENSG00000108654/ENSG00000137628/ENSG00000091831/ENSG00000196482/ENSG00000114861/ENSG00000116478/ENSG00000149948/ENSG00000204389/ENSG00000185507/ENSG00000016082/ENSG00000174697/ENSG00000257103/ENSG00000069869/ENSG00000100906/ENSG00000169297/ENSG00000120798/ENSG00000112333…	44
GO:0061035	regulation of cartilage development	16/1884	76/20870	0.00106571	0.0183469	0.015101	ENSG00000114251/ENSG00000151388/ENSG00000142871/ENSG00000118523/ENSG00000168036/ENSG00000156466/ENSG00000106571/ENSG00000174697/ENSG00000150051/ENSG00000109705/ENSG00000124813/ENSG00000006747/ENSG00000168779/ENSG00000166949/ENSG00000103056/ENSG00000134532	16
GO:0086003	cardiac muscle cell contraction	16/1884	76/20870	0.00106571	0.0183469	0.015101	ENSG00000145362/ENSG00000163399/ENSG00000157388/ENSG00000182533/ENSG00000114279/ENSG00000129682/ENSG00000148180/ENSG00000180509/ENSG00000121361/ENSG00000049759/ENSG00000113448/ENSG00000121879/ENSG00000158286/ENSG00000101400/ENSG00000159167/ENSG00000130529	16
GO:0060411	cardiac septum morphogenesis	15/1884	69/20870	0.00106831	0.0183469	0.015101	ENSG00000066468/ENSG00000118257/ENSG00000117707/ENSG00000114251/ENSG00000115170/ENSG00000101144/ENSG00000142871/ENSG00000113196/ENSG00000016082/ENSG00000081479/ENSG00000099250/ENSG00000185008/ENSG00000137834/ENSG00000176887/ENSG00000124766	15
GO:1903522	regulation of blood circulation	40/1884	268/20870	0.00109011	0.0186689	0.015366	ENSG00000145362/ENSG00000117298/ENSG00000196639/ENSG00000148926/ENSG00000135744/ENSG00000171388/ENSG00000163399/ENSG00000143153/ENSG00000157388/ENSG00000036828/ENSG00000182533/ENSG00000118523/ENSG00000198947/ENSG00000104936/ENSG00000146648/ENSG00000116016/ENSG00000181104/ENSG00000129682/ENSG00000266964/ENSG00000068024/ENSG00000171476/ENSG00000177508/ENSG00000016082/ENSG00000180509/ENSG00000120049…	40
GO:0003158	endothelium development	27/1884	160/20870	0.00110699	0.0189052	0.0155606	ENSG00000117707/ENSG00000115170/ENSG00000151388/ENSG00000136280/ENSG00000168036/ENSG00000128917/ENSG00000114861/ENSG00000120075/ENSG00000125968/ENSG00000152939/ENSG00000105976/ENSG00000284038/ENSG00000207713/ENSG00000179820/ENSG00000185551/ENSG00000099250/ENSG00000113448/ENSG00000162493/ENSG00000105894/ENSG00000123728/ENSG00000107263/ENSG00000154133/ENSG00000133121/ENSG00000159167/ENSG00000232810…	27
GO:0021846	cell proliferation in forebrain	8/1884	25/20870	0.001157	0.0194345	0.0159962	ENSG00000162946/ENSG00000066468/ENSG00000159217/ENSG00000004848/ENSG00000116641/ENSG00000106571/ENSG00000198914/ENSG00000138083	8
GO:0046058	cAMP metabolic process	8/1884	25/20870	0.001157	0.0194345	0.0159962	ENSG00000164742/ENSG00000138031/ENSG00000129467/ENSG00000162104/ENSG00000065989/ENSG00000105650/ENSG00000113448/ENSG00000171408	8
GO:0060740	prostate gland epithelium morphogenesis	8/1884	25/20870	0.001157	0.0194345	0.0159962	ENSG00000066468/ENSG00000114251/ENSG00000169083/ENSG00000101144/ENSG00000091831/ENSG00000070193/ENSG00000164690/ENSG00000137573	8
GO:0072012	glomerulus vasculature development	8/1884	25/20870	0.001157	0.0194345	0.0159962	ENSG00000003402/ENSG00000143867/ENSG00000154188/ENSG00000091879/ENSG00000101144/ENSG00000134853/ENSG00000118526/ENSG00000184937	8
GO:0072087	renal vesicle development	8/1884	25/20870	0.001157	0.0194345	0.0159962	ENSG00000143867/ENSG00000125931/ENSG00000168036/ENSG00000168621/ENSG00000273706/ENSG00000075891/ENSG00000125618/ENSG00000103449	8
GO:1900078	positive regulation of cellular response to insulin stimulus	8/1884	25/20870	0.001157	0.0194345	0.0159962	ENSG00000114353/ENSG00000135744/ENSG00000134463/ENSG00000167244/ENSG00000169047/ENSG00000174697/ENSG00000197879/ENSG00000067606	8
GO:0051271	negative regulation of cellular component movement	55/1884	401/20870	0.00117204	0.0196131	0.0161432	ENSG00000185885/ENSG00000163638/ENSG00000181790/ENSG00000006831/ENSG00000091879/ENSG00000111348/ENSG00000166780/ENSG00000130303/ENSG00000134830/ENSG00000151882/ENSG00000143418/ENSG00000172725/ENSG00000044115/ENSG00000161544/ENSG00000138061/ENSG00000164741/ENSG00000128917/ENSG00000162643/ENSG00000197635/ENSG00000113657/ENSG00000112679/ENSG00000116717/ENSG00000146535/ENSG00000189403/ENSG00000122592…	55
GO:0060996	dendritic spine development	20/1884	106/20870	0.00117403	0.0196131	0.0161432	ENSG00000146555/ENSG00000175866/ENSG00000162946/ENSG00000144711/ENSG00000068366/ENSG00000004777/ENSG00000006740/ENSG00000286237/ENSG00000198908/ENSG00000107864/ENSG00000182580/ENSG00000102081/ENSG00000158301/ENSG00000139233/ENSG00000081189/ENSG00000066248/ENSG00000077264/ENSG00000145632/ENSG00000102383/ENSG00000101040	20
GO:0010950	positive regulation of endopeptidase activity	33/1884	210/20870	0.00119811	0.0199609	0.0164295	ENSG00000003402/ENSG00000164850/ENSG00000197971/ENSG00000156709/ENSG00000117362/ENSG00000138613/ENSG00000185825/ENSG00000153094/ENSG00000259571/ENSG00000118412/ENSG00000187094/ENSG00000142871/ENSG00000118523/ENSG00000055163/ENSG00000196730/ENSG00000164741/ENSG00000143590/ENSG00000129521/ENSG00000181104/ENSG00000183770/ENSG00000148180/ENSG00000189403/ENSG00000162711/ENSG00000073921/ENSG00000140464…	33
GO:0050890	cognition	50/1884	357/20870	0.00121742	0.0202276	0.016649	ENSG00000163064/ENSG00000176697/ENSG00000196639/ENSG00000162761/ENSG00000146938/ENSG00000137868/ENSG00000164742/ENSG00000138031/ENSG00000155966/ENSG00000135744/ENSG00000286237/ENSG00000198908/ENSG00000187094/ENSG00000118971/ENSG00000168539/ENSG00000093010/ENSG00000107864/ENSG00000146648/ENSG00000141543/ENSG00000129682/ENSG00000196743/ENSG00000163328/ENSG00000158301/ENSG00000155511/ENSG00000092051…	50
GO:0030099	myeloid cell differentiation	61/1884	456/20870	0.00122272	0.0202608	0.0166763	ENSG00000129993/ENSG00000179348/ENSG00000204388/ENSG00000143995/ENSG00000182718/ENSG00000071553/ENSG00000113916/ENSG00000242252/ENSG00000172331/ENSG00000104267/ENSG00000186073/ENSG00000105810/ENSG00000119535/ENSG00000168036/ENSG00000116016/ENSG00000182511/ENSG00000151702/ENSG00000114861/ENSG00000160211/ENSG00000147257/ENSG00000189403/ENSG00000122592/ENSG00000078399/ENSG00000260027/ENSG00000120068…	61
GO:0043266	regulation of potassium ion transport	21/1884	114/20870	0.00123301	0.020318	0.0167234	ENSG00000145362/ENSG00000077522/ENSG00000141433/ENSG00000177119/ENSG00000143153/ENSG00000157388/ENSG00000182533/ENSG00000135404/ENSG00000022267/ENSG00000069424/ENSG00000170049/ENSG00000180509/ENSG00000120049/ENSG00000104783/ENSG00000184709/ENSG00000162763/ENSG00000069869/ENSG00000049759/ENSG00000117152/ENSG00000158286/ENSG00000126562	21
GO:0043627	response to estrogen	16/1884	77/20870	0.00123446	0.020318	0.0167234	ENSG00000023839/ENSG00000169083/ENSG00000242252/ENSG00000104267/ENSG00000272398/ENSG00000125931/ENSG00000093010/ENSG00000044115/ENSG00000091831/ENSG00000057593/ENSG00000106571/ENSG00000141456/ENSG00000117222/ENSG00000157765/ENSG00000137834/ENSG00000119699	16
GO:0060135	maternal process involved in female pregnancy	14/1884	63/20870	0.00123612	0.020318	0.0167234	ENSG00000091879/ENSG00000169083/ENSG00000116539/ENSG00000091831/ENSG00000188620/ENSG00000185551/ENSG00000145730/ENSG00000057657/ENSG00000105894/ENSG00000116741/ENSG00000159167/ENSG00000113739/ENSG00000173320/ENSG00000077721	14
GO:0060606	tube closure	19/1884	99/20870	0.0012484	0.0204651	0.0168444	ENSG00000114251/ENSG00000097007/ENSG00000148926/ENSG00000099954/ENSG00000164932/ENSG00000164741/ENSG00000070193/ENSG00000083307/ENSG00000158055/ENSG00000138002/ENSG00000081479/ENSG00000184634/ENSG00000075891/ENSG00000196576/ENSG00000142875/ENSG00000182175/ENSG00000145423/ENSG00000206557/ENSG00000122691	19
GO:0002063	chondrocyte development	9/1884	31/20870	0.00125665	0.0205125	0.0168835	ENSG00000104331/ENSG00000171310/ENSG00000131873/ENSG00000124813/ENSG00000145423/ENSG00000168779/ENSG00000103056/ENSG00000137573/ENSG00000182704	9
GO:0050654	chondroitin sulfate proteoglycan metabolic process	10/1884	37/20870	0.00125799	0.0205125	0.0168835	ENSG00000147408/ENSG00000182492/ENSG00000104331/ENSG00000171310/ENSG00000147119/ENSG00000131873/ENSG00000170891/ENSG00000164318/ENSG00000114378/ENSG00000107742	10
GO:0046321	positive regulation of fatty acid oxidation	6/1884	15/20870	0.00131244	0.0213437	0.0175676	ENSG00000173208/ENSG00000110090/ENSG00000163586/ENSG00000169047/ENSG00000175701/ENSG00000122691	6
GO:0043242	negative regulation of protein-containing complex disassembly	18/1884	92/20870	0.00131769	0.0213582	0.0175795	ENSG00000075340/ENSG00000166780/ENSG00000042493/ENSG00000077549/ENSG00000038532/ENSG00000129682/ENSG00000148180/ENSG00000140854/ENSG00000131711/ENSG00000165175/ENSG00000121879/ENSG00000006747/ENSG00000115306/ENSG00000137877/ENSG00000197321/ENSG00000133789/ENSG00000232810/ENSG00000160803	18
GO:0050807	regulation of synapse organization	37/1884	245/20870	0.00132363	0.0213582	0.0175795	ENSG00000175866/ENSG00000176697/ENSG00000165985/ENSG00000162946/ENSG00000118257/ENSG00000196230/ENSG00000114251/ENSG00000097007/ENSG00000181790/ENSG00000188157/ENSG00000004777/ENSG00000006740/ENSG00000286237/ENSG00000198908/ENSG00000114867/ENSG00000182580/ENSG00000183098/ENSG00000158301/ENSG00000189108/ENSG00000198739/ENSG00000166159/ENSG00000081189/ENSG00000069869/ENSG00000066248/ENSG00000179915…	37
GO:0003279	cardiac septum development	20/1884	107/20870	0.00132378	0.0213582	0.0175795	ENSG00000145362/ENSG00000066468/ENSG00000118257/ENSG00000117707/ENSG00000137868/ENSG00000114251/ENSG00000115170/ENSG00000101144/ENSG00000142871/ENSG00000113196/ENSG00000016082/ENSG00000081479/ENSG00000099250/ENSG00000125618/ENSG00000057657/ENSG00000185008/ENSG00000103449/ENSG00000137834/ENSG00000176887/ENSG00000124766	20
GO:0006874	cellular calcium ion homeostasis	63/1884	476/20870	0.00134108	0.0215805	0.0177626	ENSG00000145362/ENSG00000162946/ENSG00000179348/ENSG00000164850/ENSG00000185989/ENSG00000114251/ENSG00000097007/ENSG00000143322/ENSG00000141433/ENSG00000148926/ENSG00000135744/ENSG00000057663/ENSG00000143153/ENSG00000185825/ENSG00000131943/ENSG00000173918/ENSG00000134830/ENSG00000036828/ENSG00000182533/ENSG00000151882/ENSG00000272398/ENSG00000174343/ENSG00000180871/ENSG00000131504/ENSG00000198947…	63
GO:0030217	T cell differentiation	43/1884	297/20870	0.00134854	0.0216437	0.0178146	ENSG00000115318/ENSG00000097007/ENSG00000160224/ENSG00000057663/ENSG00000165240/ENSG00000113916/ENSG00000168036/ENSG00000128917/ENSG00000135144/ENSG00000187741/ENSG00000114861/ENSG00000106571/ENSG00000204252/ENSG00000204632/ENSG00000136630/ENSG00000189403/ENSG00000137265/ENSG00000143772/ENSG00000184916/ENSG00000174697/ENSG00000167604/ENSG00000144802/ENSG00000101882/ENSG00000119919/ENSG00000162711…	43
GO:0044344	cellular response to fibroblast growth factor stimulus	21/1884	115/20870	0.00138271	0.0220765	0.0181708	ENSG00000066468/ENSG00000114251/ENSG00000171388/ENSG00000118523/ENSG00000108821/ENSG00000168036/ENSG00000128917/ENSG00000133059/ENSG00000070193/ENSG00000114279/ENSG00000186895/ENSG00000126500/ENSG00000114378/ENSG00000119185/ENSG00000133116/ENSG00000273706/ENSG00000284231/ENSG00000124813/ENSG00000112562/ENSG00000137573/ENSG00000206557	21
GO:0046620	regulation of organ growth	21/1884	115/20870	0.00138271	0.0220765	0.0181708	ENSG00000139318/ENSG00000066468/ENSG00000143995/ENSG00000117707/ENSG00000078900/ENSG00000076555/ENSG00000004848/ENSG00000153094/ENSG00000182533/ENSG00000130829/ENSG00000054598/ENSG00000160211/ENSG00000136630/ENSG00000167244/ENSG00000082482/ENSG00000081189/ENSG00000116741/ENSG00000117152/ENSG00000159216/ENSG00000142168/ENSG00000184937	21
GO:0045668	negative regulation of osteoblast differentiation	14/1884	64/20870	0.00145297	0.0231381	0.0190446	ENSG00000105810/ENSG00000125931/ENSG00000164107/ENSG00000068024/ENSG00000105996/ENSG00000188554/ENSG00000132170/ENSG00000166949/ENSG00000137834/ENSG00000232810/ENSG00000130529/ENSG00000122691/ENSG00000233608/ENSG00000128791	14
GO:0051480	regulation of cytosolic calcium ion concentration	51/1884	369/20870	0.00146628	0.0232136	0.0191067	ENSG00000145362/ENSG00000179348/ENSG00000164850/ENSG00000185989/ENSG00000114251/ENSG00000097007/ENSG00000143322/ENSG00000141433/ENSG00000148926/ENSG00000135744/ENSG00000057663/ENSG00000185825/ENSG00000173918/ENSG00000134830/ENSG00000182533/ENSG00000151882/ENSG00000272398/ENSG00000174343/ENSG00000180871/ENSG00000131504/ENSG00000198947/ENSG00000091831/ENSG00000181104/ENSG00000127533/ENSG00000180758…	51
GO:0045214	sarcomere organization	11/1884	44/20870	0.00146907	0.0232136	0.0191067	ENSG00000178209/ENSG00000117707/ENSG00000184009/ENSG00000077522/ENSG00000182533/ENSG00000159176/ENSG00000122367/ENSG00000154358/ENSG00000100625/ENSG00000118194/ENSG00000140416	11
GO:1901381	positive regulation of potassium ion transmembrane transport	11/1884	44/20870	0.00146907	0.0232136	0.0191067	ENSG00000145362/ENSG00000077522/ENSG00000177119/ENSG00000143153/ENSG00000180509/ENSG00000120049/ENSG00000104783/ENSG00000184709/ENSG00000162763/ENSG00000158286/ENSG00000126562	11
GO:0071383	cellular response to steroid hormone stimulus	34/1884	221/20870	0.00147682	0.0232761	0.0191581	ENSG00000048540/ENSG00000003402/ENSG00000164850/ENSG00000023839/ENSG00000141433/ENSG00000156709/ENSG00000169083/ENSG00000163399/ENSG00000153094/ENSG00000101144/ENSG00000204209/ENSG00000108654/ENSG00000146648/ENSG00000091831/ENSG00000196482/ENSG00000114861/ENSG00000116478/ENSG00000149948/ENSG00000016082/ENSG00000137463/ENSG00000069869/ENSG00000169297/ENSG00000120798/ENSG00000112333/ENSG00000113580…	34
GO:0030308	negative regulation of cell growth	33/1884	213/20870	0.00152639	0.0239956	0.0197503	ENSG00000204388/ENSG00000163132/ENSG00000012171/ENSG00000114251/ENSG00000006831/ENSG00000135744/ENSG00000113916/ENSG00000130303/ENSG00000182533/ENSG00000129355/ENSG00000187323/ENSG00000129682/ENSG00000022267/ENSG00000160211/ENSG00000204389/ENSG00000114378/ENSG00000122641/ENSG00000169330/ENSG00000213619/ENSG00000099250/ENSG00000140464/ENSG00000105568/ENSG00000019485/ENSG00000182175/ENSG00000116741…	33
GO:0046639	negative regulation of alpha-beta T cell differentiation	8/1884	26/20870	0.00154031	0.0240909	0.0198288	ENSG00000115318/ENSG00000113916/ENSG00000106571/ENSG00000136630/ENSG00000189403/ENSG00000159216/ENSG00000164690/ENSG00000117586	8
GO:1903792	negative regulation of anion transport	8/1884	26/20870	0.00154031	0.0240909	0.0198288	ENSG00000183044/ENSG00000102287/ENSG00000174697/ENSG00000138669/ENSG00000116741/ENSG00000117152/ENSG00000149150/ENSG00000170893	8
GO:0097009	energy homeostasis	10/1884	38/20870	0.00157097	0.0245079	0.020172	ENSG00000076555/ENSG00000114867/ENSG00000177508/ENSG00000176845/ENSG00000168389/ENSG00000009950/ENSG00000121879/ENSG00000118473/ENSG00000111199/ENSG00000182704	10
GO:0002088	lens development in camera-type eye	17/1884	86/20870	0.00157602	0.0245243	0.0201855	ENSG00000102878/ENSG00000143995/ENSG00000007372/ENSG00000117707/ENSG00000114251/ENSG00000137936/ENSG00000125864/ENSG00000100053/ENSG00000127377/ENSG00000168036/ENSG00000188501/ENSG00000188158/ENSG00000176485/ENSG00000138083/ENSG00000166949/ENSG00000176887/ENSG00000198369	17
GO:0043268	positive regulation of potassium ion transport	12/1884	51/20870	0.00160542	0.0246774	0.0203116	ENSG00000145362/ENSG00000077522/ENSG00000177119/ENSG00000143153/ENSG00000022267/ENSG00000180509/ENSG00000120049/ENSG00000104783/ENSG00000184709/ENSG00000162763/ENSG00000158286/ENSG00000126562	12
GO:0086009	membrane repolarization	12/1884	51/20870	0.00160542	0.0246774	0.0203116	ENSG00000145362/ENSG00000163399/ENSG00000143153/ENSG00000157388/ENSG00000182533/ENSG00000180509/ENSG00000120049/ENSG00000121361/ENSG00000049759/ENSG00000158286/ENSG00000140090/ENSG00000101400	12
GO:0110151	positive regulation of biomineralization	12/1884	51/20870	0.00160542	0.0246774	0.0203116	ENSG00000143867/ENSG00000115170/ENSG00000177119/ENSG00000101144/ENSG00000142871/ENSG00000144152/ENSG00000133116/ENSG00000081189/ENSG00000105894/ENSG00000166949/ENSG00000119699/ENSG00000169884	12
GO:0021988	olfactory lobe development	9/1884	32/20870	0.00161001	0.0246774	0.0203116	ENSG00000180613/ENSG00000105880/ENSG00000114251/ENSG00000004848/ENSG00000115844/ENSG00000128610/ENSG00000112333/ENSG00000185008/ENSG00000103449	9
GO:0030204	chondroitin sulfate metabolic process	9/1884	32/20870	0.00161001	0.0246774	0.0203116	ENSG00000147408/ENSG00000182492/ENSG00000104331/ENSG00000171310/ENSG00000147119/ENSG00000131873/ENSG00000164318/ENSG00000114378/ENSG00000107742	9
GO:0048641	regulation of skeletal muscle tissue development	9/1884	32/20870	0.00161001	0.0246774	0.0203116	ENSG00000168036/ENSG00000137312/ENSG00000167244/ENSG00000081189/ENSG00000122180/ENSG00000164690/ENSG00000168779/ENSG00000122691/ENSG00000169884	9
GO:0035265	organ growth	31/1884	197/20870	0.00162009	0.02477	0.0203877	ENSG00000139318/ENSG00000066468/ENSG00000143995/ENSG00000146938/ENSG00000117707/ENSG00000078900/ENSG00000076555/ENSG00000135744/ENSG00000169083/ENSG00000004848/ENSG00000153094/ENSG00000182533/ENSG00000130829/ENSG00000091831/ENSG00000070193/ENSG00000054598/ENSG00000160211/ENSG00000136630/ENSG00000167244/ENSG00000082482/ENSG00000174697/ENSG00000081189/ENSG00000116741/ENSG00000117152/ENSG00000159216…	31
GO:0042063	gliogenesis	48/1884	344/20870	0.00162849	0.0248365	0.0204425	ENSG00000180613/ENSG00000178209/ENSG00000162946/ENSG00000162576/ENSG00000007372/ENSG00000152784/ENSG00000164828/ENSG00000078900/ENSG00000097007/ENSG00000141433/ENSG00000112414/ENSG00000166780/ENSG00000105810/ENSG00000143418/ENSG00000168539/ENSG00000168036/ENSG00000100697/ENSG00000115844/ENSG00000135144/ENSG00000146648/ENSG00000070193/ENSG00000176165/ENSG00000106571/ENSG00000180758/ENSG00000170075…	48
GO:0086001	cardiac muscle cell action potential	16/1884	79/20870	0.00164017	0.0249525	0.020538	ENSG00000145362/ENSG00000163399/ENSG00000143153/ENSG00000157388/ENSG00000182533/ENSG00000198947/ENSG00000114279/ENSG00000129682/ENSG00000180509/ENSG00000120049/ENSG00000121361/ENSG00000049759/ENSG00000158286/ENSG00000163681/ENSG00000101400/ENSG00000130529	16
GO:0030858	positive regulation of epithelial cell differentiation	14/1884	65/20870	0.00170065	0.0258086	0.0212426	ENSG00000007372/ENSG00000135541/ENSG00000272398/ENSG00000168036/ENSG00000175832/ENSG00000054598/ENSG00000168621/ENSG00000162891/ENSG00000273706/ENSG00000207713/ENSG00000137497/ENSG00000075891/ENSG00000125618/ENSG00000169884	14
GO:0009612	response to mechanical stimulus	34/1884	223/20870	0.00172376	0.026011	0.0214092	ENSG00000178209/ENSG00000137868/ENSG00000164828/ENSG00000135744/ENSG00000091879/ENSG00000163399/ENSG00000242252/ENSG00000118412/ENSG00000182533/ENSG00000174343/ENSG00000108821/ENSG00000168036/ENSG00000198947/ENSG00000146648/ENSG00000006468/ENSG00000116717/ENSG00000148180/ENSG00000068024/ENSG00000082482/ENSG00000131711/ENSG00000134138/ENSG00000150051/ENSG00000100906/ENSG00000179915/ENSG00000121879…	34
GO:0051261	protein depolymerization	21/1884	117/20870	0.00172908	0.026011	0.0214092	ENSG00000077522/ENSG00000075340/ENSG00000166780/ENSG00000042493/ENSG00000077549/ENSG00000129682/ENSG00000178950/ENSG00000148180/ENSG00000140854/ENSG00000131711/ENSG00000130479/ENSG00000165175/ENSG00000176771/ENSG00000121879/ENSG00000006747/ENSG00000115306/ENSG00000137877/ENSG00000197321/ENSG00000133789/ENSG00000111199/ENSG00000132612	21
GO:0045628	regulation of T-helper 2 cell differentiation	5/1884	11/20870	0.00173096	0.026011	0.0214092	ENSG00000113916/ENSG00000136630/ENSG00000162711/ENSG00000067606/ENSG00000117586	5
GO:2001053	regulation of mesenchymal cell apoptotic process	5/1884	11/20870	0.00173096	0.026011	0.0214092	ENSG00000163132/ENSG00000101144/ENSG00000075891/ENSG00000125618/ENSG00000164690	5
GO:0010639	negative regulation of organelle organization	52/1884	381/20870	0.00174845	0.0262096	0.0215727	ENSG00000102030/ENSG00000141556/ENSG00000075340/ENSG00000047648/ENSG00000102606/ENSG00000085224/ENSG00000166780/ENSG00000101144/ENSG00000042493/ENSG00000077549/ENSG00000182533/ENSG00000172725/ENSG00000103647/ENSG00000164741/ENSG00000162643/ENSG00000125746/ENSG00000142459/ENSG00000149557/ENSG00000129682/ENSG00000130119/ENSG00000148180/ENSG00000204389/ENSG00000086758/ENSG00000107104/ENSG00000140854…	52
GO:0072659	protein localization to plasma membrane	44/1884	310/20870	0.00177834	0.0264573	0.0217765	ENSG00000145362/ENSG00000164850/ENSG00000077522/ENSG00000029534/ENSG00000182718/ENSG00000169083/ENSG00000006740/ENSG00000130762/ENSG00000143153/ENSG00000182533/ENSG00000166997/ENSG00000146648/ENSG00000082397/ENSG00000122591/ENSG00000155744/ENSG00000129682/ENSG00000137312/ENSG00000178950/ENSG00000143457/ENSG00000119185/ENSG00000131981/ENSG00000170262/ENSG00000179820/ENSG00000168824/ENSG00000179364…	44
GO:0048813	dendrite morphogenesis	26/1884	157/20870	0.00178537	0.0264573	0.0217765	ENSG00000175866/ENSG00000257923/ENSG00000159217/ENSG00000004777/ENSG00000006740/ENSG00000286237/ENSG00000198908/ENSG00000146038/ENSG00000133083/ENSG00000171587/ENSG00000182580/ENSG00000158301/ENSG00000125968/ENSG00000069869/ENSG00000049759/ENSG00000066248/ENSG00000112333/ENSG00000099250/ENSG00000077264/ENSG00000073921/ENSG00000102103/ENSG00000105894/ENSG00000142599/ENSG00000004139/ENSG00000182606…	26
GO:0031110	regulation of microtubule polymerization or depolymerization	19/1884	102/20870	0.00179912	0.0264573	0.0217765	ENSG00000204388/ENSG00000141556/ENSG00000097007/ENSG00000102606/ENSG00000166780/ENSG00000182533/ENSG00000125746/ENSG00000182511/ENSG00000129682/ENSG00000204389/ENSG00000140854/ENSG00000131711/ENSG00000130479/ENSG00000169057/ENSG00000105976/ENSG00000165175/ENSG00000137497/ENSG00000182628/ENSG00000111199	19
GO:0090101	negative regulation of transmembrane receptor protein serine/threonine kinase signaling pathway	24/1884	141/20870	0.00180038	0.0264573	0.0217765	ENSG00000114251/ENSG00000097007/ENSG00000115170/ENSG00000171310/ENSG00000176194/ENSG00000204389/ENSG00000144730/ENSG00000081479/ENSG00000158747/ENSG00000174004/ENSG00000169856/ENSG00000124225/ENSG00000132170/ENSG00000100614/ENSG00000145423/ENSG00000137834/ENSG00000198369/ENSG00000140682/ENSG00000119699/ENSG00000128791/ENSG00000197415/ENSG00000188730/ENSG00000173714/ENSG00000125084	24
GO:0007350	blastoderm segmentation	7/1884	21/20870	0.00180381	0.0264573	0.0217765	ENSG00000118257/ENSG00000114251/ENSG00000175879/ENSG00000099250/ENSG00000179598/ENSG00000164458/ENSG00000184937	7
GO:0023019	signal transduction involved in regulation of gene expression	7/1884	21/20870	0.00180381	0.0264573	0.0217765	ENSG00000133937/ENSG00000163132/ENSG00000007372/ENSG00000119888/ENSG00000134853/ENSG00000166949/ENSG00000056972	7
GO:0048714	positive regulation of oligodendrocyte differentiation	7/1884	21/20870	0.00180381	0.0264573	0.0217765	ENSG00000180613/ENSG00000078900/ENSG00000116478/ENSG00000157368/ENSG00000105894/ENSG00000164690/ENSG00000028137	7
GO:0072283	metanephric renal vesicle morphogenesis	7/1884	21/20870	0.00180381	0.0264573	0.0217765	ENSG00000125931/ENSG00000168036/ENSG00000168621/ENSG00000273706/ENSG00000075891/ENSG00000125618/ENSG00000103449	7
GO:0090190	positive regulation of branching involved in ureteric bud morphogenesis	7/1884	21/20870	0.00180381	0.0264573	0.0217765	ENSG00000135744/ENSG00000168621/ENSG00000260027/ENSG00000273706/ENSG00000075891/ENSG00000125618/ENSG00000100625	7
GO:0050773	regulation of dendrite development	20/1884	110/20870	0.00187438	0.0274267	0.0225744	ENSG00000175866/ENSG00000257923/ENSG00000286237/ENSG00000198908/ENSG00000101144/ENSG00000164796/ENSG00000187323/ENSG00000158301/ENSG00000125968/ENSG00000168389/ENSG00000069869/ENSG00000049759/ENSG00000112333/ENSG00000124507/ENSG00000077264/ENSG00000102103/ENSG00000105894/ENSG00000124839/ENSG00000004139/ENSG00000102383	20
GO:0021795	cerebral cortex cell migration	12/1884	52/20870	0.00191839	0.0278832	0.0229502	ENSG00000162946/ENSG00000164828/ENSG00000004848/ENSG00000166780/ENSG00000168036/ENSG00000096093/ENSG00000129682/ENSG00000176165/ENSG00000106571/ENSG00000106852/ENSG00000112333/ENSG00000198914	12
GO:0072132	mesenchyme morphogenesis	12/1884	52/20870	0.00191839	0.0278832	0.0229502	ENSG00000163132/ENSG00000143867/ENSG00000114251/ENSG00000163017/ENSG00000115170/ENSG00000101144/ENSG00000054598/ENSG00000103241/ENSG00000016082/ENSG00000185008/ENSG00000166949/ENSG00000122691	12
GO:0045862	positive regulation of proteolysis	57/1884	428/20870	0.00191922	0.0278832	0.0229502	ENSG00000129993/ENSG00000003402/ENSG00000162946/ENSG00000164850/ENSG00000204388/ENSG00000197971/ENSG00000156709/ENSG00000130173/ENSG00000117362/ENSG00000138613/ENSG00000204463/ENSG00000185825/ENSG00000153094/ENSG00000259571/ENSG00000118412/ENSG00000182533/ENSG00000187094/ENSG00000142871/ENSG00000118523/ENSG00000055163/ENSG00000196730/ENSG00000164741/ENSG00000143590/ENSG00000129521/ENSG00000181104…	57
GO:0003337	mesenchymal to epithelial transition involved in metanephros morphogenesis	6/1884	16/20870	0.00194053	0.0279282	0.0229872	ENSG00000125931/ENSG00000168036/ENSG00000168621/ENSG00000075891/ENSG00000125618/ENSG00000103449	6
GO:0043584	nose development	6/1884	16/20870	0.00194053	0.0279282	0.0229872	ENSG00000105880/ENSG00000117707/ENSG00000137868/ENSG00000184254/ENSG00000106571/ENSG00000100625	6
GO:0061548	ganglion development	6/1884	16/20870	0.00194053	0.0279282	0.0229872	ENSG00000118257/ENSG00000168036/ENSG00000099250/ENSG00000151615/ENSG00000117152/ENSG00000100625	6
GO:0072224	metanephric glomerulus development	6/1884	16/20870	0.00194053	0.0279282	0.0229872	ENSG00000143867/ENSG00000273706/ENSG00000075891/ENSG00000134853/ENSG00000118526/ENSG00000184937	6
GO:0051098	regulation of binding	54/1884	401/20870	0.00194843	0.0279762	0.0230267	ENSG00000176697/ENSG00000162946/ENSG00000221818/ENSG00000163132/ENSG00000007372/ENSG00000114251/ENSG00000097007/ENSG00000075340/ENSG00000154188/ENSG00000167612/ENSG00000182718/ENSG00000102606/ENSG00000114423/ENSG00000175029/ENSG00000164932/ENSG00000168036/ENSG00000104408/ENSG00000141543/ENSG00000114867/ENSG00000115109/ENSG00000137312/ENSG00000102081/ENSG00000054598/ENSG00000092208/ENSG00000130119…	54
GO:0018209	peptidyl-serine modification	49/1884	356/20870	0.00195609	0.0280205	0.0230632	ENSG00000176697/ENSG00000102030/ENSG00000114251/ENSG00000154188/ENSG00000078061/ENSG00000105146/ENSG00000137936/ENSG00000182492/ENSG00000174672/ENSG00000169118/ENSG00000133083/ENSG00000198947/ENSG00000104936/ENSG00000116641/ENSG00000164318/ENSG00000146648/ENSG00000114867/ENSG00000116717/ENSG00000144278/ENSG00000160396/ENSG00000149948/ENSG00000263528/ENSG00000072518/ENSG00000167889/ENSG00000009950…	49
GO:0043270	positive regulation of ion transport	42/1884	294/20870	0.00197027	0.0281578	0.0231762	ENSG00000145362/ENSG00000164850/ENSG00000183044/ENSG00000097007/ENSG00000077522/ENSG00000135744/ENSG00000177119/ENSG00000143153/ENSG00000157388/ENSG00000147044/ENSG00000036828/ENSG00000187094/ENSG00000168539/ENSG00000018236/ENSG00000138495/ENSG00000198947/ENSG00000181104/ENSG00000127533/ENSG00000114279/ENSG00000102466/ENSG00000022267/ENSG00000266964/ENSG00000160211/ENSG00000168621/ENSG00000180509…	42
GO:0001952	regulation of cell-matrix adhesion	24/1884	142/20870	0.0019852	0.0283053	0.0232976	ENSG00000162946/ENSG00000097007/ENSG00000184009/ENSG00000047648/ENSG00000113916/ENSG00000147044/ENSG00000151882/ENSG00000105810/ENSG00000204580/ENSG00000164741/ENSG00000112679/ENSG00000115109/ENSG00000122592/ENSG00000119185/ENSG00000099250/ENSG00000169856/ENSG00000144824/ENSG00000145675/ENSG00000122861/ENSG00000067606/ENSG00000132669/ENSG00000170381/ENSG00000166949/ENSG00000154096	24
GO:0071559	response to transforming growth factor beta	39/1884	268/20870	0.00199882	0.0284333	0.023403	ENSG00000003402/ENSG00000066468/ENSG00000114251/ENSG00000115170/ENSG00000182533/ENSG00000171310/ENSG00000176194/ENSG00000125931/ENSG00000108821/ENSG00000050165/ENSG00000112679/ENSG00000115109/ENSG00000122176/ENSG00000140564/ENSG00000204389/ENSG00000125968/ENSG00000144730/ENSG00000081189/ENSG00000113580/ENSG00000174004/ENSG00000169856/ENSG00000124225/ENSG00000140464/ENSG00000132170/ENSG00000100614…	39
GO:0001958	endochondral ossification	8/1884	27/20870	0.00201762	0.0285024	0.0234598	ENSG00000105880/ENSG00000162551/ENSG00000104331/ENSG00000108821/ENSG00000054598/ENSG00000081189/ENSG00000124813/ENSG00000103056	8
GO:0003401	axis elongation	8/1884	27/20870	0.00201762	0.0285024	0.0234598	ENSG00000066468/ENSG00000114251/ENSG00000091831/ENSG00000070193/ENSG00000184634/ENSG00000145423/ENSG00000164690/ENSG00000100625	8
GO:0036075	replacement ossification	8/1884	27/20870	0.00201762	0.0285024	0.0234598	ENSG00000105880/ENSG00000162551/ENSG00000104331/ENSG00000108821/ENSG00000054598/ENSG00000081189/ENSG00000124813/ENSG00000103056	8
GO:0007589	body fluid secretion	19/1884	103/20870	0.00202321	0.0285157	0.0234707	ENSG00000182718/ENSG00000171388/ENSG00000057663/ENSG00000165240/ENSG00000168539/ENSG00000204580/ENSG00000102967/ENSG00000146648/ENSG00000070193/ENSG00000104783/ENSG00000113389/ENSG00000111335/ENSG00000145730/ENSG00000113494/ENSG00000112759/ENSG00000006128/ENSG00000056972/ENSG00000094841/ENSG00000126562	19
GO:0010596	negative regulation of endothelial cell migration	20/1884	111/20870	0.00209641	0.0294795	0.0242641	ENSG00000163638/ENSG00000181790/ENSG00000091879/ENSG00000128917/ENSG00000116717/ENSG00000189403/ENSG00000119185/ENSG00000169057/ENSG00000081189/ENSG00000106511/ENSG00000284038/ENSG00000207713/ENSG00000284231/ENSG00000185551/ENSG00000132170/ENSG00000067066/ENSG00000133121/ENSG00000159167/ENSG00000177868/ENSG00000232810	20
GO:0014014	negative regulation of gliogenesis	11/1884	46/20870	0.00216144	0.0301863	0.0248458	ENSG00000141433/ENSG00000143418/ENSG00000168036/ENSG00000100697/ENSG00000115844/ENSG00000170075/ENSG00000182054/ENSG00000112333/ENSG00000105894/ENSG00000176887/ENSG00000100300	11
GO:0072210	metanephric nephron development	11/1884	46/20870	0.00216144	0.0301863	0.0248458	ENSG00000143867/ENSG00000125931/ENSG00000168036/ENSG00000168621/ENSG00000273706/ENSG00000075891/ENSG00000125618/ENSG00000134853/ENSG00000103449/ENSG00000118526/ENSG00000184937	11
GO:0089718	amino acid import across plasma membrane	11/1884	46/20870	0.00216144	0.0301863	0.0248458	ENSG00000147100/ENSG00000110436/ENSG00000135744/ENSG00000116741/ENSG00000117152/ENSG00000079215/ENSG00000105281/ENSG00000149150/ENSG00000010379/ENSG00000003989/ENSG00000165349	11
GO:0010675	regulation of cellular carbohydrate metabolic process	25/1884	151/20870	0.0021703	0.0302046	0.0248609	ENSG00000129993/ENSG00000164916/ENSG00000164850/ENSG00000196639/ENSG00000076555/ENSG00000173918/ENSG00000082196/ENSG00000167986/ENSG00000071889/ENSG00000068024/ENSG00000189403/ENSG00000167244/ENSG00000169047/ENSG00000138030/ENSG00000174697/ENSG00000138039/ENSG00000122180/ENSG00000166741/ENSG00000176046/ENSG00000067992/ENSG00000181649/ENSG00000173281/ENSG00000049769/ENSG00000078237/ENSG00000171163	25
GO:0150104	transport across blood-brain barrier	18/1884	96/20870	0.0021726	0.0302046	0.0248609	ENSG00000147100/ENSG00000110436/ENSG00000023839/ENSG00000125257/ENSG00000114770/ENSG00000121361/ENSG00000081479/ENSG00000168389/ENSG00000079215/ENSG00000105281/ENSG00000185052/ENSG00000112759/ENSG00000181856/ENSG00000111371/ENSG00000010379/ENSG00000003989/ENSG00000165349/ENSG00000176463	18
GO:0060048	cardiac muscle contraction	24/1884	143/20870	0.00218596	0.0302808	0.0249236	ENSG00000145362/ENSG00000163399/ENSG00000143153/ENSG00000157388/ENSG00000182533/ENSG00000118523/ENSG00000198947/ENSG00000114279/ENSG00000129682/ENSG00000148180/ENSG00000068024/ENSG00000180509/ENSG00000121361/ENSG00000207713/ENSG00000049759/ENSG00000113448/ENSG00000121879/ENSG00000116741/ENSG00000158286/ENSG00000101400/ENSG00000159167/ENSG00000118194/ENSG00000140416/ENSG00000130529	24
GO:0045446	endothelial cell differentiation	23/1884	135/20870	0.00218878	0.0302808	0.0249236	ENSG00000117707/ENSG00000115170/ENSG00000136280/ENSG00000168036/ENSG00000120075/ENSG00000125968/ENSG00000152939/ENSG00000105976/ENSG00000284038/ENSG00000207713/ENSG00000179820/ENSG00000185551/ENSG00000099250/ENSG00000113448/ENSG00000162493/ENSG00000105894/ENSG00000123728/ENSG00000107263/ENSG00000154133/ENSG00000159167/ENSG00000232810/ENSG00000067182/ENSG00000148516	23
GO:0110148	biomineralization	29/1884	184/20870	0.0021929	0.0302808	0.0249236	ENSG00000066468/ENSG00000143867/ENSG00000115170/ENSG00000162551/ENSG00000177119/ENSG00000242252/ENSG00000101144/ENSG00000142871/ENSG00000108821/ENSG00000177706/ENSG00000144152/ENSG00000000938/ENSG00000147257/ENSG00000119185/ENSG00000133116/ENSG00000174697/ENSG00000081189/ENSG00000188554/ENSG00000105894/ENSG00000169071/ENSG00000185052/ENSG00000140090/ENSG00000166949/ENSG00000103056/ENSG00000086300…	29
GO:0043281	regulation of cysteine-type endopeptidase activity involved in apoptotic process	35/1884	235/20870	0.00223128	0.0307415	0.0253027	ENSG00000003402/ENSG00000164850/ENSG00000156709/ENSG00000185825/ENSG00000153094/ENSG00000023445/ENSG00000259571/ENSG00000118412/ENSG00000187094/ENSG00000142871/ENSG00000118523/ENSG00000129355/ENSG00000196730/ENSG00000164741/ENSG00000129521/ENSG00000181104/ENSG00000163586/ENSG00000183770/ENSG00000148180/ENSG00000189403/ENSG00000089289/ENSG00000170430/ENSG00000162711/ENSG00000075891/ENSG00000140464…	35
GO:0014020	primary neural tube formation	19/1884	104/20870	0.00227037	0.0311974	0.0256781	ENSG00000114251/ENSG00000097007/ENSG00000148926/ENSG00000101144/ENSG00000099954/ENSG00000164932/ENSG00000164741/ENSG00000083307/ENSG00000158055/ENSG00000138002/ENSG00000081479/ENSG00000184634/ENSG00000075891/ENSG00000196576/ENSG00000142875/ENSG00000182175/ENSG00000145423/ENSG00000206557/ENSG00000122691	19
GO:0010718	positive regulation of epithelial to mesenchymal transition	12/1884	53/20870	0.00227964	0.0311974	0.0256781	ENSG00000115170/ENSG00000101144/ENSG00000108821/ENSG00000168036/ENSG00000054598/ENSG00000016082/ENSG00000162493/ENSG00000166949/ENSG00000148737/ENSG00000140682/ENSG00000119699/ENSG00000122691	12
GO:0035272	exocrine system development	12/1884	53/20870	0.00227964	0.0311974	0.0256781	ENSG00000066468/ENSG00000007372/ENSG00000101144/ENSG00000158813/ENSG00000070193/ENSG00000054598/ENSG00000167244/ENSG00000099250/ENSG00000164690/ENSG00000119699/ENSG00000232810/ENSG00000128791	12
GO:0060998	regulation of dendritic spine development	14/1884	67/20870	0.00230176	0.03143	0.0258695	ENSG00000146555/ENSG00000175866/ENSG00000162946/ENSG00000286237/ENSG00000198908/ENSG00000107864/ENSG00000102081/ENSG00000158301/ENSG00000139233/ENSG00000081189/ENSG00000066248/ENSG00000077264/ENSG00000145632/ENSG00000101040	14
GO:0050803	regulation of synapse structure or activity	37/1884	253/20870	0.00235127	0.0320348	0.0263673	ENSG00000175866/ENSG00000176697/ENSG00000165985/ENSG00000162946/ENSG00000118257/ENSG00000196230/ENSG00000114251/ENSG00000097007/ENSG00000181790/ENSG00000188157/ENSG00000004777/ENSG00000006740/ENSG00000286237/ENSG00000198908/ENSG00000114867/ENSG00000182580/ENSG00000183098/ENSG00000158301/ENSG00000189108/ENSG00000198739/ENSG00000166159/ENSG00000081189/ENSG00000069869/ENSG00000066248/ENSG00000179915…	37
GO:0007435	salivary gland morphogenesis	10/1884	40/20870	0.00238574	0.0323605	0.0266354	ENSG00000066468/ENSG00000007372/ENSG00000101144/ENSG00000158813/ENSG00000070193/ENSG00000099250/ENSG00000164690/ENSG00000119699/ENSG00000232810/ENSG00000128791	10
GO:0099622	cardiac muscle cell membrane repolarization	10/1884	40/20870	0.00238574	0.0323605	0.0266354	ENSG00000145362/ENSG00000163399/ENSG00000143153/ENSG00000157388/ENSG00000182533/ENSG00000180509/ENSG00000120049/ENSG00000121361/ENSG00000158286/ENSG00000101400	10
GO:0071560	cellular response to transforming growth factor beta stimulus	38/1884	262/20870	0.00240145	0.0325018	0.0267516	ENSG00000003402/ENSG00000066468/ENSG00000114251/ENSG00000115170/ENSG00000182533/ENSG00000171310/ENSG00000176194/ENSG00000125931/ENSG00000108821/ENSG00000050165/ENSG00000112679/ENSG00000115109/ENSG00000122176/ENSG00000140564/ENSG00000204389/ENSG00000125968/ENSG00000144730/ENSG00000081189/ENSG00000113580/ENSG00000174004/ENSG00000169856/ENSG00000124225/ENSG00000140464/ENSG00000132170/ENSG00000100614…	38
GO:0060070	canonical Wnt signaling pathway	44/1884	315/20870	0.0024298	0.032813	0.0270078	ENSG00000162946/ENSG00000105880/ENSG00000066468/ENSG00000101849/ENSG00000114251/ENSG00000184675/ENSG00000165566/ENSG00000135299/ENSG00000182220/ENSG00000108821/ENSG00000169118/ENSG00000164932/ENSG00000168036/ENSG00000050165/ENSG00000104901/ENSG00000158813/ENSG00000146648/ENSG00000189319/ENSG00000070193/ENSG00000106571/ENSG00000147257/ENSG00000116478/ENSG00000016082/ENSG00000107104/ENSG00000184634…	44
GO:0072079	nephron tubule formation	7/1884	22/20870	0.00244155	0.0328993	0.0270788	ENSG00000143867/ENSG00000168036/ENSG00000168621/ENSG00000177508/ENSG00000075891/ENSG00000125618/ENSG00000100625	7
GO:0010232	vascular transport	18/1884	97/20870	0.00244725	0.0329037	0.0270824	ENSG00000147100/ENSG00000110436/ENSG00000023839/ENSG00000125257/ENSG00000114770/ENSG00000121361/ENSG00000081479/ENSG00000168389/ENSG00000079215/ENSG00000105281/ENSG00000185052/ENSG00000112759/ENSG00000181856/ENSG00000111371/ENSG00000010379/ENSG00000003989/ENSG00000165349/ENSG00000176463	18
GO:0008543	fibroblast growth factor receptor signaling pathway	16/1884	82/20870	0.00245433	0.0329105	0.027088	ENSG00000066468/ENSG00000114251/ENSG00000171388/ENSG00000118523/ENSG00000168036/ENSG00000133059/ENSG00000070193/ENSG00000114279/ENSG00000186895/ENSG00000126500/ENSG00000133116/ENSG00000284231/ENSG00000124813/ENSG00000112562/ENSG00000137573/ENSG00000206557	16
GO:0008544	epidermis development	49/1884	360/20870	0.00246386	0.0329105	0.027088	ENSG00000178209/ENSG00000052850/ENSG00000066468/ENSG00000007372/ENSG00000164093/ENSG00000114251/ENSG00000169692/ENSG00000165240/ENSG00000169594/ENSG00000118523/ENSG00000154227/ENSG00000168036/ENSG00000167968/ENSG00000158813/ENSG00000146648/ENSG00000104413/ENSG00000175832/ENSG00000110723/ENSG00000070193/ENSG00000054598/ENSG00000120370/ENSG00000083307/ENSG00000158055/ENSG00000116478/ENSG00000122592…	49
GO:1990778	protein localization to cell periphery	49/1884	360/20870	0.00246386	0.0329105	0.027088	ENSG00000145362/ENSG00000164850/ENSG00000109339/ENSG00000077522/ENSG00000029534/ENSG00000182718/ENSG00000169083/ENSG00000006740/ENSG00000130762/ENSG00000143153/ENSG00000182533/ENSG00000166997/ENSG00000146648/ENSG00000079819/ENSG00000082397/ENSG00000122591/ENSG00000155744/ENSG00000129682/ENSG00000137312/ENSG00000178950/ENSG00000143457/ENSG00000183098/ENSG00000119185/ENSG00000131981/ENSG00000170262…	49
GO:0021543	pallium development	30/1884	194/20870	0.00250311	0.0333621	0.0274597	ENSG00000162946/ENSG00000159217/ENSG00000162761/ENSG00000007372/ENSG00000117707/ENSG00000164828/ENSG00000004848/ENSG00000137343/ENSG00000166780/ENSG00000105810/ENSG00000149187/ENSG00000168036/ENSG00000115844/ENSG00000142700/ENSG00000096093/ENSG00000149557/ENSG00000153266/ENSG00000129682/ENSG00000176165/ENSG00000128573/ENSG00000106571/ENSG00000116478/ENSG00000106852/ENSG00000168389/ENSG00000112333…	30
GO:0048738	cardiac muscle tissue development	37/1884	254/20870	0.00251875	0.0334977	0.0275714	ENSG00000178209/ENSG00000066468/ENSG00000143995/ENSG00000163132/ENSG00000117707/ENSG00000078900/ENSG00000114251/ENSG00000077522/ENSG00000115170/ENSG00000163638/ENSG00000135744/ENSG00000057663/ENSG00000101144/ENSG00000116161/ENSG00000182533/ENSG00000100211/ENSG00000128917/ENSG00000186895/ENSG00000115641/ENSG00000054598/ENSG00000160211/ENSG00000113196/ENSG00000171476/ENSG00000177508/ENSG00000016082…	37
GO:0050673	epithelial cell proliferation	60/1884	461/20870	0.00254193	0.0336746	0.027717	ENSG00000003402/ENSG00000105880/ENSG00000066468/ENSG00000179348/ENSG00000118257/ENSG00000143867/ENSG00000007372/ENSG00000117707/ENSG00000114251/ENSG00000232040/ENSG00000164022/ENSG00000171388/ENSG00000178301/ENSG00000169083/ENSG00000165240/ENSG00000086062/ENSG00000134830/ENSG00000147044/ENSG00000105810/ENSG00000168036/ENSG00000128917/ENSG00000006377/ENSG00000146648/ENSG00000091831/ENSG00000070193…	60
GO:0031330	negative regulation of cellular catabolic process	42/1884	298/20870	0.00254303	0.0336746	0.027717	ENSG00000164916/ENSG00000159217/ENSG00000076555/ENSG00000182718/ENSG00000178301/ENSG00000204463/ENSG00000152430/ENSG00000099622/ENSG00000038532/ENSG00000130826/ENSG00000147677/ENSG00000114867/ENSG00000139160/ENSG00000149557/ENSG00000102081/ENSG00000140564/ENSG00000168621/ENSG00000263528/ENSG00000125337/ENSG00000174697/ENSG00000180336/ENSG00000105976/ENSG00000168389/ENSG00000171100/ENSG00000102043…	42
GO:0090183	regulation of kidney development	9/1884	34/20870	0.00255378	0.033744	0.0277741	ENSG00000143867/ENSG00000135744/ENSG00000168621/ENSG00000260027/ENSG00000273706/ENSG00000075891/ENSG00000125618/ENSG00000100625/ENSG00000184937	9
GO:0045669	positive regulation of osteoblast differentiation	15/1884	75/20870	0.00257265	0.0338474	0.0278592	ENSG00000185885/ENSG00000115170/ENSG00000071553/ENSG00000101144/ENSG00000142871/ENSG00000164932/ENSG00000168036/ENSG00000162643/ENSG00000106571/ENSG00000081189/ENSG00000207713/ENSG00000124813/ENSG00000145423/ENSG00000176887/ENSG00000169884	15
GO:1901880	negative regulation of protein depolymerization	15/1884	75/20870	0.00257265	0.0338474	0.0278592	ENSG00000075340/ENSG00000166780/ENSG00000042493/ENSG00000077549/ENSG00000129682/ENSG00000148180/ENSG00000140854/ENSG00000131711/ENSG00000165175/ENSG00000121879/ENSG00000006747/ENSG00000115306/ENSG00000137877/ENSG00000197321/ENSG00000133789	15
GO:0030850	prostate gland development	11/1884	47/20870	0.00259555	0.0338961	0.0278993	ENSG00000066468/ENSG00000114251/ENSG00000169083/ENSG00000101144/ENSG00000213145/ENSG00000168036/ENSG00000091831/ENSG00000070193/ENSG00000106571/ENSG00000164690/ENSG00000137573	11
GO:0070588	calcium ion transmembrane transport	46/1884	334/20870	0.0026039	0.0338961	0.0278993	ENSG00000145362/ENSG00000164850/ENSG00000185989/ENSG00000097007/ENSG00000177119/ENSG00000182718/ENSG00000057663/ENSG00000143153/ENSG00000158966/ENSG00000157388/ENSG00000182389/ENSG00000182533/ENSG00000174343/ENSG00000120088/ENSG00000131504/ENSG00000198947/ENSG00000181104/ENSG00000127533/ENSG00000102466/ENSG00000102081/ENSG00000160211/ENSG00000164949/ENSG00000069966/ENSG00000005700/ENSG00000092051…	46
GO:0045844	positive regulation of striated muscle tissue development	8/1884	28/20870	0.00260399	0.0338961	0.0278993	ENSG00000186260/ENSG00000168036/ENSG00000137312/ENSG00000167244/ENSG00000081189/ENSG00000122180/ENSG00000164690/ENSG00000168779	8
GO:0046174	polyol catabolic process	8/1884	28/20870	0.00260399	0.0338961	0.0278993	ENSG00000104331/ENSG00000198814/ENSG00000068383/ENSG00000204084/ENSG00000100253/ENSG00000003987/ENSG00000122126/ENSG00000078269	8
GO:0048636	positive regulation of muscle organ development	8/1884	28/20870	0.00260399	0.0338961	0.0278993	ENSG00000186260/ENSG00000168036/ENSG00000137312/ENSG00000167244/ENSG00000081189/ENSG00000122180/ENSG00000164690/ENSG00000168779	8
GO:0003170	heart valve development	14/1884	68/20870	0.00266236	0.0345824	0.0284642	ENSG00000137868/ENSG00000115170/ENSG00000163638/ENSG00000142871/ENSG00000128917/ENSG00000081189/ENSG00000057657/ENSG00000185008/ENSG00000168779/ENSG00000137834/ENSG00000124766/ENSG00000067182/ENSG00000028137/ENSG00000122691	14
GO:0060350	endochondral bone morphogenesis	12/1884	54/20870	0.0026945	0.0348396	0.0286758	ENSG00000105880/ENSG00000162551/ENSG00000104331/ENSG00000108821/ENSG00000054598/ENSG00000081189/ENSG00000124813/ENSG00000168779/ENSG00000103056/ENSG00000159167/ENSG00000111199/ENSG00000182704	12
GO:0007611	learning or memory	42/1884	299/20870	0.00270692	0.0348396	0.0286758	ENSG00000163064/ENSG00000176697/ENSG00000196639/ENSG00000162761/ENSG00000146938/ENSG00000137868/ENSG00000164742/ENSG00000138031/ENSG00000155966/ENSG00000135744/ENSG00000286237/ENSG00000198908/ENSG00000187094/ENSG00000118971/ENSG00000093010/ENSG00000107864/ENSG00000146648/ENSG00000141543/ENSG00000129682/ENSG00000196743/ENSG00000158301/ENSG00000155511/ENSG00000092051/ENSG00000082482/ENSG00000133703…	42
GO:0003207	cardiac chamber formation	5/1884	12/20870	0.00274784	0.0348396	0.0286758	ENSG00000113196/ENSG00000164107/ENSG00000081189/ENSG00000176887/ENSG00000124766	5
GO:0009886	post-embryonic animal morphogenesis	5/1884	12/20870	0.00274784	0.0348396	0.0286758	ENSG00000085224/ENSG00000153094/ENSG00000171587/ENSG00000205581/ENSG00000119919	5
GO:0021978	telencephalon regionalization	5/1884	12/20870	0.00274784	0.0348396	0.0286758	ENSG00000180613/ENSG00000007372/ENSG00000142700/ENSG00000164690/ENSG00000138083	5
GO:0060788	ectodermal placode formation	5/1884	12/20870	0.00274784	0.0348396	0.0286758	ENSG00000117707/ENSG00000168036/ENSG00000158813/ENSG00000116478/ENSG00000100625	5
GO:0071697	ectodermal placode morphogenesis	5/1884	12/20870	0.00274784	0.0348396	0.0286758	ENSG00000117707/ENSG00000168036/ENSG00000158813/ENSG00000116478/ENSG00000100625	5
GO:0072178	nephric duct morphogenesis	5/1884	12/20870	0.00274784	0.0348396	0.0286758	ENSG00000143867/ENSG00000135541/ENSG00000147257/ENSG00000273706/ENSG00000075891	5
GO:0097152	mesenchymal cell apoptotic process	5/1884	12/20870	0.00274784	0.0348396	0.0286758	ENSG00000163132/ENSG00000101144/ENSG00000075891/ENSG00000125618/ENSG00000164690	5
GO:1905214	regulation of RNA binding	5/1884	12/20870	0.00274784	0.0348396	0.0286758	ENSG00000104408/ENSG00000141543/ENSG00000114867/ENSG00000102081/ENSG00000092208	5
GO:2000009	negative regulation of protein localization to cell surface	5/1884	12/20870	0.00274784	0.0348396	0.0286758	ENSG00000077522/ENSG00000182533/ENSG00000049759/ENSG00000073921/ENSG00000173548	5
GO:0001843	neural tube closure	18/1884	98/20870	0.00275034	0.0348396	0.0286758	ENSG00000114251/ENSG00000097007/ENSG00000148926/ENSG00000099954/ENSG00000164932/ENSG00000164741/ENSG00000083307/ENSG00000158055/ENSG00000138002/ENSG00000081479/ENSG00000184634/ENSG00000075891/ENSG00000196576/ENSG00000142875/ENSG00000182175/ENSG00000145423/ENSG00000206557/ENSG00000122691	18
GO:0098739	import across plasma membrane	29/1884	187/20870	0.00280074	0.0354048	0.029141	ENSG00000147100/ENSG00000110436/ENSG00000135744/ENSG00000075673/ENSG00000163399/ENSG00000143153/ENSG00000157551/ENSG00000121361/ENSG00000081479/ENSG00000207713/ENSG00000116741/ENSG00000117152/ENSG00000113504/ENSG00000221955/ENSG00000088386/ENSG00000139370/ENSG00000079215/ENSG00000105281/ENSG00000140090/ENSG00000149150/ENSG00000010379/ENSG00000003989/ENSG00000165349/ENSG00000198689/ENSG00000065923…	29
GO:0055001	muscle cell development	31/1884	204/20870	0.00282307	0.0356136	0.0293129	ENSG00000178209/ENSG00000145362/ENSG00000003402/ENSG00000117707/ENSG00000184009/ENSG00000077522/ENSG00000148926/ENSG00000135744/ENSG00000057663/ENSG00000182533/ENSG00000159176/ENSG00000198947/ENSG00000167196/ENSG00000115641/ENSG00000160211/ENSG00000068024/ENSG00000016082/ENSG00000122367/ENSG00000122180/ENSG00000154358/ENSG00000134853/ENSG00000116741/ENSG00000117152/ENSG00000168779/ENSG00000100625…	31
GO:0060612	adipose tissue development	10/1884	41/20870	0.00290421	0.0364125	0.0299705	ENSG00000221818/ENSG00000075239/ENSG00000184675/ENSG00000150347/ENSG00000036828/ENSG00000174697/ENSG00000121879/ENSG00000176485/ENSG00000151615/ENSG00000130529	10
GO:0071526	semaphorin-plexin signaling pathway	10/1884	41/20870	0.00290421	0.0364125	0.0299705	ENSG00000118257/ENSG00000012171/ENSG00000168621/ENSG00000164107/ENSG00000105976/ENSG00000099250/ENSG00000196576/ENSG00000170381/ENSG00000082684/ENSG00000143434	10
GO:0071542	dopaminergic neuron differentiation	10/1884	41/20870	0.00290421	0.0364125	0.0299705	ENSG00000163064/ENSG00000162761/ENSG00000114251/ENSG00000168036/ENSG00000142700/ENSG00000153234/ENSG00000165462/ENSG00000145423/ENSG00000164690/ENSG00000125084	10
GO:2001056	positive regulation of cysteine-type endopeptidase activity	27/1884	171/20870	0.00297176	0.0371834	0.030605	ENSG00000003402/ENSG00000164850/ENSG00000156709/ENSG00000185825/ENSG00000153094/ENSG00000259571/ENSG00000118412/ENSG00000187094/ENSG00000142871/ENSG00000118523/ENSG00000055163/ENSG00000196730/ENSG00000164741/ENSG00000129521/ENSG00000181104/ENSG00000183770/ENSG00000148180/ENSG00000189403/ENSG00000162711/ENSG00000140464/ENSG00000132170/ENSG00000185088/ENSG00000079387/ENSG00000166949/ENSG00000171056…	27
GO:0051099	positive regulation of binding	29/1884	188/20870	0.00303289	0.037871	0.0311709	ENSG00000176697/ENSG00000221818/ENSG00000007372/ENSG00000114251/ENSG00000097007/ENSG00000075340/ENSG00000182718/ENSG00000175029/ENSG00000164932/ENSG00000168036/ENSG00000104408/ENSG00000114867/ENSG00000115109/ENSG00000137312/ENSG00000102081/ENSG00000054598/ENSG00000164107/ENSG00000189403/ENSG00000137265/ENSG00000016082/ENSG00000105976/ENSG00000099250/ENSG00000145632/ENSG00000005421/ENSG00000151615…	29
GO:0030901	midbrain development	18/1884	99/20870	0.00308411	0.0384323	0.0316329	ENSG00000163064/ENSG00000066468/ENSG00000162761/ENSG00000197971/ENSG00000163132/ENSG00000115507/ENSG00000114251/ENSG00000168036/ENSG00000180871/ENSG00000160211/ENSG00000165795/ENSG00000213619/ENSG00000153234/ENSG00000165462/ENSG00000145423/ENSG00000164690/ENSG00000143028/ENSG00000125084	18
GO:0051489	regulation of filopodium assembly	11/1884	48/20870	0.00309739	0.0384497	0.0316473	ENSG00000188157/ENSG00000006740/ENSG00000077549/ENSG00000113657/ENSG00000102081/ENSG00000114416/ENSG00000099250/ENSG00000145675/ENSG00000124839/ENSG00000119699/ENSG00000101040	11
GO:0036293	response to decreased oxygen levels	47/1884	346/20870	0.00309805	0.0384497	0.0316473	ENSG00000129993/ENSG00000003402/ENSG00000183044/ENSG00000148926/ENSG00000156709/ENSG00000108602/ENSG00000091879/ENSG00000143153/ENSG00000165240/ENSG00000101144/ENSG00000036828/ENSG00000121691/ENSG00000118523/ENSG00000272398/ENSG00000161544/ENSG00000140465/ENSG00000197635/ENSG00000129521/ENSG00000116016/ENSG00000057593/ENSG00000163586/ENSG00000124440/ENSG00000082482/ENSG00000171303/ENSG00000174697…	47
GO:2000649	regulation of sodium ion transmembrane transporter activity	13/1884	62/20870	0.0031501	0.0389856	0.0320883	ENSG00000143867/ENSG00000143153/ENSG00000182533/ENSG00000198947/ENSG00000114279/ENSG00000129682/ENSG00000102466/ENSG00000266964/ENSG00000069869/ENSG00000049759/ENSG00000163681/ENSG00000088992/ENSG00000126562	13
GO:0046637	regulation of alpha-beta T cell differentiation	16/1884	84/20870	0.00316482	0.0389856	0.0320883	ENSG00000115318/ENSG00000113916/ENSG00000106571/ENSG00000136630/ENSG00000189403/ENSG00000137265/ENSG00000143772/ENSG00000167604/ENSG00000144802/ENSG00000101882/ENSG00000162711/ENSG00000057657/ENSG00000067606/ENSG00000159216/ENSG00000164690/ENSG00000117586	16
GO:0033280	response to vitamin D	9/1884	35/20870	0.00316666	0.0389856	0.0320883	ENSG00000162551/ENSG00000242252/ENSG00000101144/ENSG00000036828/ENSG00000129355/ENSG00000182511/ENSG00000105894/ENSG00000159167/ENSG00000113739	9
GO:0045879	negative regulation of smoothened signaling pathway	9/1884	35/20870	0.00316666	0.0389856	0.0320883	ENSG00000106571/ENSG00000147257/ENSG00000170075/ENSG00000138002/ENSG00000166813/ENSG00000102858/ENSG00000142875/ENSG00000111783/ENSG00000124813	9
GO:0045926	negative regulation of growth	39/1884	275/20870	0.00317312	0.0389868	0.0320893	ENSG00000204388/ENSG00000143995/ENSG00000163132/ENSG00000012171/ENSG00000078900/ENSG00000114251/ENSG00000006831/ENSG00000135744/ENSG00000113916/ENSG00000130303/ENSG00000182533/ENSG00000129355/ENSG00000187323/ENSG00000129682/ENSG00000022267/ENSG00000160211/ENSG00000147257/ENSG00000204389/ENSG00000114378/ENSG00000122641/ENSG00000082482/ENSG00000169330/ENSG00000125144/ENSG00000213619/ENSG00000099250…	39
GO:0030038	contractile actin filament bundle assembly	20/1884	115/20870	0.00321939	0.0393974	0.0324273	ENSG00000106683/ENSG00000097007/ENSG00000184009/ENSG00000047648/ENSG00000118523/ENSG00000103647/ENSG00000164741/ENSG00000119185/ENSG00000105976/ENSG00000099250/ENSG00000070087/ENSG00000144824/ENSG00000145675/ENSG00000089159/ENSG00000166949/ENSG00000120896/ENSG00000006128/ENSG00000119699/ENSG00000140416/ENSG00000158195	20
GO:0043149	stress fiber assembly	20/1884	115/20870	0.00321939	0.0393974	0.0324273	ENSG00000106683/ENSG00000097007/ENSG00000184009/ENSG00000047648/ENSG00000118523/ENSG00000103647/ENSG00000164741/ENSG00000119185/ENSG00000105976/ENSG00000099250/ENSG00000070087/ENSG00000144824/ENSG00000145675/ENSG00000089159/ENSG00000166949/ENSG00000120896/ENSG00000006128/ENSG00000119699/ENSG00000140416/ENSG00000158195	20
GO:0001837	epithelial to mesenchymal transition	27/1884	172/20870	0.00322928	0.0394198	0.0324458	ENSG00000133937/ENSG00000066468/ENSG00000115318/ENSG00000163132/ENSG00000114251/ENSG00000115170/ENSG00000101144/ENSG00000108821/ENSG00000168036/ENSG00000108654/ENSG00000115109/ENSG00000054598/ENSG00000149948/ENSG00000144730/ENSG00000016082/ENSG00000162493/ENSG00000144824/ENSG00000196154/ENSG00000167985/ENSG00000145423/ENSG00000166949/ENSG00000198369/ENSG00000148737/ENSG00000140682/ENSG00000119699…	27
GO:0060231	mesenchymal to epithelial transition	7/1884	23/20870	0.0032395	0.0394198	0.0324458	ENSG00000125931/ENSG00000168036/ENSG00000168621/ENSG00000075891/ENSG00000125618/ENSG00000103449/ENSG00000184937	7
GO:1902106	negative regulation of leukocyte differentiation	21/1884	123/20870	0.00324051	0.0394198	0.0324458	ENSG00000179348/ENSG00000115318/ENSG00000113916/ENSG00000105810/ENSG00000168036/ENSG00000135144/ENSG00000100225/ENSG00000106571/ENSG00000204632/ENSG00000136630/ENSG00000189403/ENSG00000122592/ENSG00000122641/ENSG00000128606/ENSG00000145675/ENSG00000159216/ENSG00000164690/ENSG00000106565/ENSG00000152154/ENSG00000117586/ENSG00000144161	21
GO:1903131	mononuclear cell differentiation	63/1884	494/20870	0.00325687	0.0395403	0.0325449	ENSG00000115318/ENSG00000097007/ENSG00000160224/ENSG00000057663/ENSG00000165240/ENSG00000113916/ENSG00000105810/ENSG00000168036/ENSG00000128917/ENSG00000135144/ENSG00000187741/ENSG00000100225/ENSG00000182511/ENSG00000114861/ENSG00000106571/ENSG00000068024/ENSG00000204252/ENSG00000204632/ENSG00000136630/ENSG00000189403/ENSG00000122592/ENSG00000161405/ENSG00000157368/ENSG00000122641/ENSG00000137265…	63
GO:0035116	embryonic hindlimb morphogenesis	8/1884	29/20870	0.00331545	0.0400928	0.0329996	ENSG00000052850/ENSG00000163132/ENSG00000143867/ENSG00000168036/ENSG00000147257/ENSG00000164690/ENSG00000121075/ENSG00000122691	8
GO:1901863	positive regulation of muscle tissue development	8/1884	29/20870	0.00331545	0.0400928	0.0329996	ENSG00000186260/ENSG00000168036/ENSG00000137312/ENSG00000167244/ENSG00000081189/ENSG00000122180/ENSG00000164690/ENSG00000168779	8
GO:0043523	regulation of neuron apoptotic process	34/1884	232/20870	0.00332802	0.0401655	0.0330595	ENSG00000163064/ENSG00000176697/ENSG00000156709/ENSG00000154188/ENSG00000286237/ENSG00000153094/ENSG00000198908/ENSG00000125931/ENSG00000168036/ENSG00000129521/ENSG00000181104/ENSG00000160211/ENSG00000168621/ENSG00000158301/ENSG00000030582/ENSG00000116478/ENSG00000068024/ENSG00000016082/ENSG00000133703/ENSG00000173327/ENSG00000169057/ENSG00000081189/ENSG00000153234/ENSG00000099250/ENSG00000225950…	34
GO:0050810	regulation of steroid biosynthetic process	15/1884	77/20870	0.00335661	0.040431	0.033278	ENSG00000162676/ENSG00000117707/ENSG00000148926/ENSG00000084674/ENSG00000163399/ENSG00000050165/ENSG00000104901/ENSG00000174697/ENSG00000111684/ENSG00000012174/ENSG00000199158/ENSG00000169297/ENSG00000142168/ENSG00000232810/ENSG00000100300	15
GO:0001666	response to hypoxia	45/1884	330/20870	0.00347769	0.0418073	0.0344108	ENSG00000129993/ENSG00000003402/ENSG00000183044/ENSG00000148926/ENSG00000108602/ENSG00000091879/ENSG00000143153/ENSG00000165240/ENSG00000101144/ENSG00000036828/ENSG00000121691/ENSG00000272398/ENSG00000161544/ENSG00000140465/ENSG00000197635/ENSG00000129521/ENSG00000116016/ENSG00000057593/ENSG00000163586/ENSG00000124440/ENSG00000082482/ENSG00000171303/ENSG00000174697/ENSG00000169057/ENSG00000137463…	45
GO:0007431	salivary gland development	10/1884	42/20870	0.00350874	0.042098	0.0346501	ENSG00000066468/ENSG00000007372/ENSG00000101144/ENSG00000158813/ENSG00000070193/ENSG00000099250/ENSG00000164690/ENSG00000119699/ENSG00000232810/ENSG00000128791	10
GO:0031109	microtubule polymerization or depolymerization	23/1884	140/20870	0.00352323	0.0421571	0.0346987	ENSG00000204388/ENSG00000141556/ENSG00000097007/ENSG00000102606/ENSG00000166780/ENSG00000182533/ENSG00000125746/ENSG00000182511/ENSG00000129682/ENSG00000204389/ENSG00000140854/ENSG00000131711/ENSG00000130479/ENSG00000129680/ENSG00000169057/ENSG00000105976/ENSG00000165175/ENSG00000176771/ENSG00000137497/ENSG00000182628/ENSG00000111199/ENSG00000126216/ENSG00000275835	23
GO:0150115	cell-substrate junction organization	19/1884	108/20870	0.00352742	0.0421571	0.0346987	ENSG00000178209/ENSG00000144711/ENSG00000097007/ENSG00000184009/ENSG00000077522/ENSG00000047648/ENSG00000102606/ENSG00000103647/ENSG00000164741/ENSG00000112679/ENSG00000115109/ENSG00000119185/ENSG00000099250/ENSG00000144824/ENSG00000145675/ENSG00000143398/ENSG00000152894/ENSG00000166949/ENSG00000154096	19
GO:0021761	limbic system development	20/1884	116/20870	0.00356767	0.0425552	0.0350264	ENSG00000134595/ENSG00000066468/ENSG00000162761/ENSG00000118257/ENSG00000117707/ENSG00000184254/ENSG00000137343/ENSG00000105810/ENSG00000115844/ENSG00000149557/ENSG00000153266/ENSG00000129682/ENSG00000106571/ENSG00000116478/ENSG00000168389/ENSG00000169297/ENSG00000112333/ENSG00000099250/ENSG00000171540/ENSG00000182704	20
GO:0031214	biomineral tissue development	28/1884	182/20870	0.00367582	0.0437601	0.0360181	ENSG00000066468/ENSG00000143867/ENSG00000115170/ENSG00000162551/ENSG00000177119/ENSG00000242252/ENSG00000101144/ENSG00000142871/ENSG00000108821/ENSG00000177706/ENSG00000000938/ENSG00000147257/ENSG00000119185/ENSG00000133116/ENSG00000174697/ENSG00000081189/ENSG00000188554/ENSG00000105894/ENSG00000169071/ENSG00000185052/ENSG00000140090/ENSG00000166949/ENSG00000103056/ENSG00000086300/ENSG00000119699…	28
GO:0003229	ventricular cardiac muscle tissue development	12/1884	56/20870	0.00370801	0.0439725	0.036193	ENSG00000066468/ENSG00000117707/ENSG00000163638/ENSG00000128917/ENSG00000054598/ENSG00000113196/ENSG00000171476/ENSG00000177508/ENSG00000016082/ENSG00000081479/ENSG00000118194/ENSG00000140416	12
GO:0051496	positive regulation of stress fiber assembly	12/1884	56/20870	0.00370801	0.0439725	0.036193	ENSG00000106683/ENSG00000097007/ENSG00000118523/ENSG00000119185/ENSG00000099250/ENSG00000070087/ENSG00000089159/ENSG00000166949/ENSG00000120896/ENSG00000006128/ENSG00000119699/ENSG00000140416	12
GO:0006816	calcium ion transport	60/1884	469/20870	0.00374458	0.0443205	0.0364794	ENSG00000145362/ENSG00000114353/ENSG00000164850/ENSG00000185989/ENSG00000097007/ENSG00000135744/ENSG00000177119/ENSG00000182718/ENSG00000057663/ENSG00000143153/ENSG00000158966/ENSG00000157388/ENSG00000182389/ENSG00000147044/ENSG00000036828/ENSG00000182533/ENSG00000118523/ENSG00000174343/ENSG00000120088/ENSG00000168036/ENSG00000131504/ENSG00000198947/ENSG00000181104/ENSG00000127533/ENSG00000102466…	60
GO:0006635	fatty acid beta-oxidation	15/1884	78/20870	0.00381646	0.0449702	0.0370142	ENSG00000173208/ENSG00000076555/ENSG00000075239/ENSG00000110090/ENSG00000121310/ENSG00000140374/ENSG00000139160/ENSG00000163586/ENSG00000072506/ENSG00000169047/ENSG00000174697/ENSG00000102910/ENSG00000168389/ENSG00000175701/ENSG00000122691	15
GO:0030540	female genitalia development	6/1884	18/20870	0.00384348	0.0449702	0.0370142	ENSG00000137868/ENSG00000114251/ENSG00000091831/ENSG00000070193/ENSG00000273706/ENSG00000081479	6
GO:0046855	inositol phosphate dephosphorylation	6/1884	18/20870	0.00384348	0.0449702	0.0370142	ENSG00000104331/ENSG00000068383/ENSG00000204084/ENSG00000003987/ENSG00000122126/ENSG00000078269	6
GO:0055119	relaxation of cardiac muscle	6/1884	18/20870	0.00384348	0.0449702	0.0370142	ENSG00000163399/ENSG00000143153/ENSG00000148180/ENSG00000113448/ENSG00000121879/ENSG00000116741	6
GO:0060602	branch elongation of an epithelium	6/1884	18/20870	0.00384348	0.0449702	0.0370142	ENSG00000066468/ENSG00000114251/ENSG00000091831/ENSG00000070193/ENSG00000164690/ENSG00000100625	6
GO:2000343	positive regulation of chemokine (C-X-C motif) ligand 2 production	6/1884	18/20870	0.00384348	0.0449702	0.0370142	ENSG00000197971/ENSG00000116478/ENSG00000189403/ENSG00000175445/ENSG00000153898/ENSG00000232810	6
GO:0030510	regulation of BMP signaling pathway	18/1884	101/20870	0.00385305	0.0449963	0.0370356	ENSG00000163132/ENSG00000114251/ENSG00000097007/ENSG00000142871/ENSG00000147257/ENSG00000081479/ENSG00000158747/ENSG00000137497/ENSG00000132170/ENSG00000182175/ENSG00000145423/ENSG00000137834/ENSG00000176887/ENSG00000137573/ENSG00000128791/ENSG00000188730/ENSG00000125084/ENSG00000101966	18
GO:0035137	hindlimb morphogenesis	9/1884	36/20870	0.00388964	0.0451643	0.0371739	ENSG00000052850/ENSG00000163132/ENSG00000143867/ENSG00000168036/ENSG00000147257/ENSG00000128710/ENSG00000164690/ENSG00000121075/ENSG00000122691	9
GO:0046856	phosphatidylinositol dephosphorylation	9/1884	36/20870	0.00388964	0.0451643	0.0371739	ENSG00000184984/ENSG00000068383/ENSG00000204084/ENSG00000171100/ENSG00000014914/ENSG00000003987/ENSG00000102043/ENSG00000122126/ENSG00000078269	9
GO:2000780	negative regulation of double-strand break repair	9/1884	36/20870	0.00388964	0.0451643	0.0371739	ENSG00000122783/ENSG00000127311/ENSG00000149948/ENSG00000168101/ENSG00000167770/ENSG00000147231/ENSG00000080345/ENSG00000122691/ENSG00000160803	9
GO:0007204	positive regulation of cytosolic calcium ion concentration	45/1884	332/20870	0.0038969	0.0451643	0.0371739	ENSG00000145362/ENSG00000179348/ENSG00000164850/ENSG00000185989/ENSG00000097007/ENSG00000143322/ENSG00000141433/ENSG00000148926/ENSG00000135744/ENSG00000057663/ENSG00000185825/ENSG00000173918/ENSG00000134830/ENSG00000182533/ENSG00000151882/ENSG00000272398/ENSG00000174343/ENSG00000180871/ENSG00000131504/ENSG00000198947/ENSG00000091831/ENSG00000181104/ENSG00000127533/ENSG00000180758/ENSG00000189403…	45
GO:0006112	energy reserve metabolic process	16/1884	86/20870	0.00403695	0.0466991	0.0384372	ENSG00000198380/ENSG00000189403/ENSG00000167244/ENSG00000169047/ENSG00000138030/ENSG00000133116/ENSG00000174697/ENSG00000044446/ENSG00000164776/ENSG00000181649/ENSG00000173281/ENSG00000049769/ENSG00000115592/ENSG00000100504/ENSG00000068976/ENSG00000118804	16
GO:0018108	peptidyl-tyrosine phosphorylation	54/1884	415/20870	0.00405737	0.046847	0.0385589	ENSG00000066468/ENSG00000097007/ENSG00000143322/ENSG00000115170/ENSG00000135744/ENSG00000189292/ENSG00000154188/ENSG00000114423/ENSG00000187094/ENSG00000272398/ENSG00000018236/ENSG00000204580/ENSG00000082458/ENSG00000175920/ENSG00000133059/ENSG00000112679/ENSG00000146648/ENSG00000182580/ENSG00000182511/ENSG00000070193/ENSG00000000938/ENSG00000116478/ENSG00000160396/ENSG00000005700/ENSG00000272395…	54
GO:0045619	regulation of lymphocyte differentiation	31/1884	209/20870	0.00409094	0.0471458	0.0388049	ENSG00000115318/ENSG00000097007/ENSG00000113916/ENSG00000135144/ENSG00000187741/ENSG00000100225/ENSG00000106571/ENSG00000204252/ENSG00000204632/ENSG00000136630/ENSG00000189403/ENSG00000161405/ENSG00000122641/ENSG00000137265/ENSG00000143772/ENSG00000235568/ENSG00000167604/ENSG00000144802/ENSG00000101882/ENSG00000162711/ENSG00000057657/ENSG00000067606/ENSG00000168421/ENSG00000159216/ENSG00000164690…	31
GO:0060174	limb bud formation	5/1884	13/20870	0.00413575	0.0475727	0.0391563	ENSG00000066468/ENSG00000070193/ENSG00000164690/ENSG00000176887/ENSG00000124766	5
GO:0000737	DNA catabolic process, endonucleolytic	8/1884	30/20870	0.00416886	0.0475965	0.0391758	ENSG00000156709/ENSG00000099954/ENSG00000176194/ENSG00000100697/ENSG00000013563/ENSG00000167968/ENSG00000163687/ENSG00000183770	8
GO:0003209	cardiac atrium morphogenesis	8/1884	30/20870	0.00416886	0.0475965	0.0391758	ENSG00000117707/ENSG00000114251/ENSG00000115170/ENSG00000142871/ENSG00000128917/ENSG00000016082/ENSG00000168779/ENSG00000124766	8
GO:0010884	positive regulation of lipid storage	8/1884	30/20870	0.00416886	0.0475965	0.0391758	ENSG00000076555/ENSG00000084674/ENSG00000176194/ENSG00000139914/ENSG00000263528/ENSG00000175445/ENSG00000207744/ENSG00000147872	8
GO:0030262	apoptotic nuclear changes	8/1884	30/20870	0.00416886	0.0475965	0.0391758	ENSG00000164850/ENSG00000156709/ENSG00000099954/ENSG00000176194/ENSG00000160570/ENSG00000100697/ENSG00000163687/ENSG00000183770	8
GO:0019217	regulation of fatty acid metabolic process	17/1884	94/20870	0.00419296	0.0476691	0.0392356	ENSG00000173208/ENSG00000076555/ENSG00000110090/ENSG00000139160/ENSG00000163586/ENSG00000169047/ENSG00000102910/ENSG00000123684/ENSG00000168389/ENSG00000165175/ENSG00000199158/ENSG00000009950/ENSG00000175701/ENSG00000067992/ENSG00000132170/ENSG00000213689/ENSG00000122691	17
GO:0043624	cellular protein complex disassembly	23/1884	142/20870	0.00422121	0.0476691	0.0392356	ENSG00000077522/ENSG00000075340/ENSG00000164062/ENSG00000166780/ENSG00000042493/ENSG00000077549/ENSG00000132507/ENSG00000129682/ENSG00000178950/ENSG00000148180/ENSG00000140854/ENSG00000131711/ENSG00000130479/ENSG00000165175/ENSG00000176771/ENSG00000121879/ENSG00000006747/ENSG00000115306/ENSG00000137877/ENSG00000197321/ENSG00000133789/ENSG00000111199/ENSG00000132612	23
GO:0003148	outflow tract septum morphogenesis	7/1884	24/20870	0.00422188	0.0476691	0.0392356	ENSG00000066468/ENSG00000118257/ENSG00000016082/ENSG00000081479/ENSG00000099250/ENSG00000185008/ENSG00000137834	7
GO:0030878	thyroid gland development	7/1884	24/20870	0.00422188	0.0476691	0.0392356	ENSG00000105997/ENSG00000120093/ENSG00000128652/ENSG00000070193/ENSG00000125618/ENSG00000164690/ENSG00000166949	7
GO:0072077	renal vesicle morphogenesis	7/1884	24/20870	0.00422188	0.0476691	0.0392356	ENSG00000125931/ENSG00000168036/ENSG00000168621/ENSG00000273706/ENSG00000075891/ENSG00000125618/ENSG00000103449	7
GO:0090189	regulation of branching involved in ureteric bud morphogenesis	7/1884	24/20870	0.00422188	0.0476691	0.0392356	ENSG00000135744/ENSG00000168621/ENSG00000260027/ENSG00000273706/ENSG00000075891/ENSG00000125618/ENSG00000100625	7
GO:0060840	artery development	18/1884	102/20870	0.00429318	0.0482326	0.0396993	ENSG00000117707/ENSG00000137868/ENSG00000163638/ENSG00000084674/ENSG00000128917/ENSG00000054598/ENSG00000103241/ENSG00000106571/ENSG00000164107/ENSG00000174697/ENSG00000081479/ENSG00000284182/ENSG00000099250/ENSG00000057657/ENSG00000185008/ENSG00000164690/ENSG00000137834/ENSG00000124766	18
GO:0006109	regulation of carbohydrate metabolic process	28/1884	184/20870	0.00429538	0.0482326	0.0396993	ENSG00000129993/ENSG00000164916/ENSG00000164850/ENSG00000196639/ENSG00000076555/ENSG00000173918/ENSG00000082196/ENSG00000167986/ENSG00000071889/ENSG00000068024/ENSG00000189403/ENSG00000167244/ENSG00000169047/ENSG00000138030/ENSG00000174697/ENSG00000138039/ENSG00000009950/ENSG00000122180/ENSG00000166741/ENSG00000176046/ENSG00000067992/ENSG00000181649/ENSG00000173281/ENSG00000049769/ENSG00000103056…	28
GO:0043271	negative regulation of ion transport	28/1884	184/20870	0.00429538	0.0482326	0.0396993	ENSG00000143867/ENSG00000183044/ENSG00000077522/ENSG00000141433/ENSG00000165240/ENSG00000182533/ENSG00000120088/ENSG00000114279/ENSG00000102081/ENSG00000102287/ENSG00000164949/ENSG00000069966/ENSG00000180509/ENSG00000174697/ENSG00000207713/ENSG00000284231/ENSG00000069869/ENSG00000049759/ENSG00000125510/ENSG00000138669/ENSG00000116741/ENSG00000117152/ENSG00000149150/ENSG00000159167/ENSG00000170893…	28
GO:0032330	regulation of chondrocyte differentiation	12/1884	57/20870	0.00431885	0.0483191	0.0397706	ENSG00000151388/ENSG00000118523/ENSG00000168036/ENSG00000156466/ENSG00000106571/ENSG00000150051/ENSG00000109705/ENSG00000124813/ENSG00000006747/ENSG00000168779/ENSG00000166949/ENSG00000134532	12
GO:1902743	regulation of lamellipodium organization	12/1884	57/20870	0.00431885	0.0483191	0.0397706	ENSG00000115091/ENSG00000102606/ENSG00000165240/ENSG00000077549/ENSG00000172725/ENSG00000068024/ENSG00000107104/ENSG00000162493/ENSG00000121879/ENSG00000145675/ENSG00000158195/ENSG00000125084	12
GO:0070169	positive regulation of biomineral tissue development	11/1884	50/20870	0.00433387	0.0483988	0.0398362	ENSG00000143867/ENSG00000115170/ENSG00000177119/ENSG00000101144/ENSG00000142871/ENSG00000133116/ENSG00000081189/ENSG00000105894/ENSG00000166949/ENSG00000119699/ENSG00000169884	11
GO:0051258	protein polymerization	45/1884	334/20870	0.00435869	0.048551	0.0399614	ENSG00000175866/ENSG00000007237/ENSG00000204388/ENSG00000141556/ENSG00000097007/ENSG00000115091/ENSG00000075340/ENSG00000047648/ENSG00000102606/ENSG00000128298/ENSG00000188277/ENSG00000042493/ENSG00000077549/ENSG00000182533/ENSG00000163171/ENSG00000172725/ENSG00000055163/ENSG00000131504/ENSG00000162643/ENSG00000125746/ENSG00000182511/ENSG00000129682/ENSG00000148180/ENSG00000204389/ENSG00000107104…	45
GO:0043434	response to peptide hormone	56/1884	435/20870	0.00436333	0.048551	0.0399614	ENSG00000175866/ENSG00000003402/ENSG00000114353/ENSG00000164850/ENSG00000023839/ENSG00000077522/ENSG00000148926/ENSG00000135744/ENSG00000137936/ENSG00000242252/ENSG00000101144/ENSG00000104267/ENSG00000116161/ENSG00000121691/ENSG00000118523/ENSG00000125931/ENSG00000108821/ENSG00000120088/ENSG00000134463/ENSG00000057593/ENSG00000115290/ENSG00000140443/ENSG00000167244/ENSG00000163083/ENSG00000169047…	56
GO:0031345	negative regulation of cell projection organization	29/1884	193/20870	0.00445412	0.0494714	0.040719	ENSG00000162676/ENSG00000012171/ENSG00000114251/ENSG00000138639/ENSG00000006740/ENSG00000077549/ENSG00000143418/ENSG00000187323/ENSG00000113657/ENSG00000142459/ENSG00000129682/ENSG00000178950/ENSG00000203879/ENSG00000125968/ENSG00000107104/ENSG00000169330/ENSG00000007944/ENSG00000066248/ENSG00000175745/ENSG00000099250/ENSG00000070087/ENSG00000117280/ENSG00000182175/ENSG00000170381/ENSG00000082684…	29

## Sheet: Molecular Function
ID	Description	GeneRatio	BgRatio	pvalue	p.adjust	qvalue	geneID	Count
GO:0001216	DNA-binding transcription activator activity	92/1923	478/20678	1.06016e-11	1.22767e-08	1.14832e-08	ENSG00000198807/ENSG00000119042/ENSG00000052850/ENSG00000143032/ENSG00000105880/ENSG00000221818/ENSG00000179348/ENSG00000120093/ENSG00000180818/ENSG00000123388/ENSG00000198353/ENSG00000128652/ENSG00000162761/ENSG00000085276/ENSG00000143995/ENSG00000163132/ENSG00000115507/ENSG00000007372/ENSG00000078900/ENSG00000167394/ENSG00000169083/ENSG00000213676/ENSG00000169594/ENSG00000105392/ENSG00000115844…	92
GO:0001228	DNA-binding transcription activator activity, RNA polymerase II-specific	90/1923	472/20678	3.0088e-11	1.7421e-08	1.6295e-08	ENSG00000198807/ENSG00000119042/ENSG00000052850/ENSG00000143032/ENSG00000105880/ENSG00000221818/ENSG00000179348/ENSG00000120093/ENSG00000180818/ENSG00000123388/ENSG00000198353/ENSG00000128652/ENSG00000162761/ENSG00000085276/ENSG00000143995/ENSG00000163132/ENSG00000115507/ENSG00000007372/ENSG00000078900/ENSG00000167394/ENSG00000169083/ENSG00000213676/ENSG00000105392/ENSG00000115844/ENSG00000173253…	90
GO:0001217	DNA-binding transcription repressor activity	58/1923	342/20678	5.10051e-06	0.0019688	0.00184155	ENSG00000163064/ENSG00000133937/ENSG00000164916/ENSG00000162676/ENSG00000124831/ENSG00000163132/ENSG00000007372/ENSG00000117707/ENSG00000167394/ENSG00000004848/ENSG00000112182/ENSG00000113916/ENSG00000161940/ENSG00000095794/ENSG00000123576/ENSG00000146618/ENSG00000128610/ENSG00000153266/ENSG00000114861/ENSG00000128573/ENSG00000113196/ENSG00000177374/ENSG00000105996/ENSG00000120068/ENSG00000168348…	58
GO:0001227	DNA-binding transcription repressor activity, RNA polymerase II-specific	56/1923	339/20678	1.62467e-05	0.00470342	0.00439944	ENSG00000163064/ENSG00000133937/ENSG00000164916/ENSG00000162676/ENSG00000124831/ENSG00000163132/ENSG00000007372/ENSG00000117707/ENSG00000167394/ENSG00000004848/ENSG00000112182/ENSG00000113916/ENSG00000161940/ENSG00000095794/ENSG00000123576/ENSG00000146618/ENSG00000128610/ENSG00000153266/ENSG00000114861/ENSG00000128573/ENSG00000113196/ENSG00000177374/ENSG00000105996/ENSG00000120068/ENSG00000168348…	56
GO:0001161	intronic transcription regulatory region sequence-specific DNA binding	7/1923	12/20678	3.09438e-05	0.00716659	0.00670341	ENSG00000113916/ENSG00000083307/ENSG00000185420/ENSG00000148704/ENSG00000116035/ENSG00000144161/ENSG00000256683	7
GO:0008013	beta-catenin binding	21/1923	88/20678	4.30357e-05	0.0083059	0.00776909	ENSG00000101849/ENSG00000184675/ENSG00000165566/ENSG00000169083/ENSG00000100211/ENSG00000044115/ENSG00000168036/ENSG00000091831/ENSG00000106571/ENSG00000107104/ENSG00000184634/ENSG00000153234/ENSG00000152894/ENSG00000089159/ENSG00000103449/ENSG00000113558/ENSG00000166949/ENSG00000196628/ENSG00000081059/ENSG00000148737/ENSG00000133107	21
GO:0046873	metal ion transmembrane transporter activity	66/1923	460/20678	0.000257415	0.0425838	0.0398316	ENSG00000185989/ENSG00000110436/ENSG00000182718/ENSG00000075673/ENSG00000163399/ENSG00000143153/ENSG00000165240/ENSG00000158966/ENSG00000157388/ENSG00000182389/ENSG00000174343/ENSG00000148842/ENSG00000171189/ENSG00000164418/ENSG00000149403/ENSG00000182255/ENSG00000069424/ENSG00000170049/ENSG00000102057/ENSG00000180509/ENSG00000184611/ENSG00000120049/ENSG00000157551/ENSG00000121361/ENSG00000082482…	66
GO:0042562	hormone binding	20/1923	94/20678	0.000343159	0.0496723	0.0464619	ENSG00000117298/ENSG00000164850/ENSG00000115170/ENSG00000006831/ENSG00000184254/ENSG00000169083/ENSG00000163399/ENSG00000163394/ENSG00000120088/ENSG00000146648/ENSG00000140443/ENSG00000122641/ENSG00000138039/ENSG00000081479/ENSG00000113389/ENSG00000113580/ENSG00000145675/ENSG00000113494/ENSG00000151090/ENSG00000100300	20

## Sheet: Cellular Component
ID	Description	GeneRatio	BgRatio	pvalue	p.adjust	qvalue	geneID	Count
GO:0031252	cell leading edge	75/1966	451/21916	1.21895e-07	8.54486e-05	8.07076e-05	ENSG00000175866/ENSG00000129675/ENSG00000164850/ENSG00000159217/ENSG00000106683/ENSG00000110436/ENSG00000097007/ENSG00000099204/ENSG00000163017/ENSG00000115091/ENSG00000029534/ENSG00000182718/ENSG00000077420/ENSG00000163697/ENSG00000006740/ENSG00000180448/ENSG00000102606/ENSG00000182220/ENSG00000165240/ENSG00000042493/ENSG00000077549/ENSG00000105810/ENSG00000172725/ENSG00000044115/ENSG00000168036…	75
GO:0045178	basal part of cell	51/1966	301/21916	7.14978e-06	0.002506	0.00236695	ENSG00000145362/ENSG00000135502/ENSG00000125257/ENSG00000114770/ENSG00000029534/ENSG00000182718/ENSG00000167580/ENSG00000075673/ENSG00000163399/ENSG00000143153/ENSG00000165240/ENSG00000086062/ENSG00000134830/ENSG00000063180/ENSG00000104267/ENSG00000183128/ENSG00000147044/ENSG00000036828/ENSG00000161649/ENSG00000013297/ENSG00000148842/ENSG00000168036/ENSG00000082458/ENSG00000116641/ENSG00000133059…	51
GO:0009925	basal plasma membrane	48/1966	282/21916	1.15796e-05	0.00270578	0.00255565	ENSG00000145362/ENSG00000135502/ENSG00000125257/ENSG00000114770/ENSG00000029534/ENSG00000182718/ENSG00000167580/ENSG00000075673/ENSG00000163399/ENSG00000143153/ENSG00000165240/ENSG00000086062/ENSG00000134830/ENSG00000063180/ENSG00000104267/ENSG00000183128/ENSG00000147044/ENSG00000036828/ENSG00000161649/ENSG00000148842/ENSG00000168036/ENSG00000082458/ENSG00000133059/ENSG00000146648/ENSG00000119888…	48
GO:0031256	leading edge membrane	34/1966	193/21916	0.000104157	0.0137227	0.0129613	ENSG00000164850/ENSG00000110436/ENSG00000029534/ENSG00000006740/ENSG00000180448/ENSG00000182220/ENSG00000131504/ENSG00000164741/ENSG00000197635/ENSG00000146648/ENSG00000082397/ENSG00000115109/ENSG00000000938/ENSG00000022355/ENSG00000102287/ENSG00000182256/ENSG00000155511/ENSG00000161638/ENSG00000107104/ENSG00000125869/ENSG00000197879/ENSG00000124507/ENSG00000065989/ENSG00000162493/ENSG00000143398…	34
GO:0030055	cell-substrate junction	68/1966	486/21916	0.000156806	0.0137227	0.0129613	ENSG00000178209/ENSG00000204388/ENSG00000106683/ENSG00000138964/ENSG00000184009/ENSG00000077522/ENSG00000115091/ENSG00000181790/ENSG00000077420/ENSG00000138639/ENSG00000102606/ENSG00000137343/ENSG00000137936/ENSG00000131236/ENSG00000149260/ENSG00000147044/ENSG00000121691/ENSG00000182533/ENSG00000102181/ENSG00000172725/ENSG00000103647/ENSG00000159176/ENSG00000044115/ENSG00000168036/ENSG00000164741…	68
GO:0030027	lamellipodium	37/1966	221/21916	0.000157068	0.0137227	0.0129613	ENSG00000175866/ENSG00000129675/ENSG00000159217/ENSG00000106683/ENSG00000099204/ENSG00000163017/ENSG00000115091/ENSG00000077420/ENSG00000163697/ENSG00000102606/ENSG00000042493/ENSG00000077549/ENSG00000172725/ENSG00000044115/ENSG00000168036/ENSG00000149091/ENSG00000197635/ENSG00000113657/ENSG00000112679/ENSG00000146425/ENSG00000102302/ENSG00000137312/ENSG00000119185/ENSG00000111859/ENSG00000188158…	37
GO:0045121	membrane raft	56/1966	382/21916	0.00017418	0.0137227	0.0129613	ENSG00000145362/ENSG00000131620/ENSG00000003402/ENSG00000114353/ENSG00000110436/ENSG00000196230/ENSG00000164742/ENSG00000075340/ENSG00000154188/ENSG00000182718/ENSG00000163399/ENSG00000143153/ENSG00000165240/ENSG00000023445/ENSG00000130303/ENSG00000182533/ENSG00000114423/ENSG00000272398/ENSG00000018236/ENSG00000044115/ENSG00000168036/ENSG00000164741/ENSG00000198947/ENSG00000197635/ENSG00000090776…	56
GO:0098857	membrane microdomain	56/1966	382/21916	0.00017418	0.0137227	0.0129613	ENSG00000145362/ENSG00000131620/ENSG00000003402/ENSG00000114353/ENSG00000110436/ENSG00000196230/ENSG00000164742/ENSG00000075340/ENSG00000154188/ENSG00000182718/ENSG00000163399/ENSG00000143153/ENSG00000165240/ENSG00000023445/ENSG00000130303/ENSG00000182533/ENSG00000114423/ENSG00000272398/ENSG00000018236/ENSG00000044115/ENSG00000168036/ENSG00000164741/ENSG00000198947/ENSG00000197635/ENSG00000090776…	56
GO:0005925	focal adhesion	67/1966	479/21916	0.000176182	0.0137227	0.0129613	ENSG00000178209/ENSG00000204388/ENSG00000106683/ENSG00000138964/ENSG00000184009/ENSG00000077522/ENSG00000115091/ENSG00000181790/ENSG00000077420/ENSG00000138639/ENSG00000102606/ENSG00000137343/ENSG00000137936/ENSG00000131236/ENSG00000149260/ENSG00000147044/ENSG00000121691/ENSG00000182533/ENSG00000102181/ENSG00000172725/ENSG00000103647/ENSG00000159176/ENSG00000044115/ENSG00000168036/ENSG00000164741…	67
GO:0016328	lateral plasma membrane	16/1966	67/21916	0.00022376	0.0156856	0.0148153	ENSG00000141556/ENSG00000163399/ENSG00000143153/ENSG00000157224/ENSG00000106404/ENSG00000168036/ENSG00000198947/ENSG00000119888/ENSG00000129682/ENSG00000146535/ENSG00000072518/ENSG00000197879/ENSG00000168824/ENSG00000137497/ENSG00000105568/ENSG00000101400	16
GO:0005667	transcription regulator complex	63/1966	450/21916	0.0002642	0.0168367	0.0159025	ENSG00000133937/ENSG00000119042/ENSG00000052850/ENSG00000179348/ENSG00000162676/ENSG00000143995/ENSG00000164093/ENSG00000101849/ENSG00000213676/ENSG00000095794/ENSG00000105392/ENSG00000175029/ENSG00000168036/ENSG00000126733/ENSG00000116016/ENSG00000183733/ENSG00000103241/ENSG00000106571/ENSG00000113196/ENSG00000164107/ENSG00000116478/ENSG00000068024/ENSG00000137309/ENSG00000189403/ENSG00000078399…	63
GO:0045177	apical part of cell	65/1966	475/21916	0.000402172	0.0234936	0.02219	ENSG00000145362/ENSG00000131620/ENSG00000147100/ENSG00000168065/ENSG00000023839/ENSG00000125257/ENSG00000114770/ENSG00000184009/ENSG00000115170/ENSG00000167580/ENSG00000075673/ENSG00000163399/ENSG00000143153/ENSG00000182220/ENSG00000114573/ENSG00000165240/ENSG00000130303/ENSG00000134830/ENSG00000104267/ENSG00000036828/ENSG00000161649/ENSG00000171365/ENSG00000168036/ENSG00000197635/ENSG00000133059…	65
GO:0005938	cell cortex	47/1966	322/21916	0.000610749	0.0329335	0.0311062	ENSG00000066468/ENSG00000185215/ENSG00000077522/ENSG00000182718/ENSG00000102606/ENSG00000125864/ENSG00000131236/ENSG00000077549/ENSG00000118523/ENSG00000175029/ENSG00000168036/ENSG00000164741/ENSG00000198947/ENSG00000197102/ENSG00000079819/ENSG00000283632/ENSG00000163586/ENSG00000137312/ENSG00000148180/ENSG00000136732/ENSG00000143341/ENSG00000135835/ENSG00000058085/ENSG00000090316/ENSG00000130830…	47
GO:0016323	basolateral plasma membrane	39/1966	256/21916	0.000750684	0.0375878	0.0355023	ENSG00000145362/ENSG00000135502/ENSG00000125257/ENSG00000114770/ENSG00000029534/ENSG00000182718/ENSG00000167580/ENSG00000075673/ENSG00000163399/ENSG00000143153/ENSG00000165240/ENSG00000086062/ENSG00000063180/ENSG00000104267/ENSG00000183128/ENSG00000147044/ENSG00000036828/ENSG00000161649/ENSG00000148842/ENSG00000168036/ENSG00000082458/ENSG00000133059/ENSG00000146648/ENSG00000119888/ENSG00000137312…	39
