# Supplementary material for: Smoking Suppresses the Therapeutic Potential of Adipose Stem Cells in Crohn’s Disease Patients through Epigenetic Changes
Source: Cells. 2023 Mar 27;12(7):1021. doi: 10.3390/cells12071021 (PMC10093550; doi:10.3390/cells12071021)
Supplement: Supplementary file 1 [file cells-12-01021-s001.zip › Supplementary Excel S3.xlsx]

## Sheet: Biologic Process
ID	Description	GeneRatio	BgRatio	pvalue	p.adjust	qvalue	geneID	Count
GO:0048705	skeletal system morphogenesis	81/2947	224/20870	1.04333e-16	4.83203e-13	4.03372e-13	ENSG00000167522/ENSG00000105880/ENSG00000105997/ENSG00000120093/ENSG00000198353/ENSG00000052850/ENSG00000150347/ENSG00000101144/ENSG00000066468/ENSG00000120075/ENSG00000163132/ENSG00000119042/ENSG00000145423/ENSG00000168779/ENSG00000166949/ENSG00000176887/ENSG00000134532/ENSG00000092607/ENSG00000137203/ENSG00000197043/ENSG00000168283/ENSG00000125378/ENSG00000138696/ENSG00000131873/ENSG00000060718…	81
GO:0048706	embryonic skeletal system development	56/2947	126/20870	1.51974e-16	4.83203e-13	4.03372e-13	ENSG00000105997/ENSG00000120093/ENSG00000198353/ENSG00000052850/ENSG00000101144/ENSG00000066468/ENSG00000120075/ENSG00000119042/ENSG00000168779/ENSG00000166949/ENSG00000176887/ENSG00000137573/ENSG00000092607/ENSG00000137203/ENSG00000114251/ENSG00000168283/ENSG00000125378/ENSG00000060718/ENSG00000108821/ENSG00000144355/ENSG00000104313/ENSG00000106571/ENSG00000083307/ENSG00000133937/ENSG00000105991…	56
GO:0048704	embryonic skeletal system morphogenesis	47/2947	97/20870	6.48634e-16	1.37489e-12	1.14774e-12	ENSG00000105997/ENSG00000120093/ENSG00000198353/ENSG00000052850/ENSG00000101144/ENSG00000066468/ENSG00000120075/ENSG00000119042/ENSG00000168779/ENSG00000166949/ENSG00000176887/ENSG00000092607/ENSG00000137203/ENSG00000168283/ENSG00000125378/ENSG00000060718/ENSG00000104313/ENSG00000106571/ENSG00000083307/ENSG00000133937/ENSG00000105991/ENSG00000105996/ENSG00000197576/ENSG00000106004/ENSG00000078399…	47
GO:0048562	embryonic organ morphogenesis	96/2947	301/20870	2.0044e-15	2.64551e-12	2.20844e-12	ENSG00000105880/ENSG00000105997/ENSG00000120093/ENSG00000198353/ENSG00000115507/ENSG00000117707/ENSG00000052850/ENSG00000101144/ENSG00000066468/ENSG00000103241/ENSG00000158055/ENSG00000120075/ENSG00000163132/ENSG00000007372/ENSG00000119042/ENSG00000168779/ENSG00000166949/ENSG00000176887/ENSG00000092607/ENSG00000137203/ENSG00000114251/ENSG00000184254/ENSG00000100628/ENSG00000168283/ENSG00000125378…	96
GO:0007389	pattern specification process	129/2947	458/20870	2.08013e-15	2.64551e-12	2.20844e-12	ENSG00000180613/ENSG00000185551/ENSG00000105997/ENSG00000120093/ENSG00000198353/ENSG00000115507/ENSG00000089225/ENSG00000052850/ENSG00000169083/ENSG00000101144/ENSG00000163064/ENSG00000066468/ENSG00000103241/ENSG00000158055/ENSG00000120075/ENSG00000143995/ENSG00000163132/ENSG00000118257/ENSG00000007372/ENSG00000164093/ENSG00000204227/ENSG00000119042/ENSG00000145423/ENSG00000159263/ENSG00000166949…	129
GO:0048568	embryonic organ development	128/2947	467/20870	2.51652e-14	2.4907e-11	2.07921e-11	ENSG00000185551/ENSG00000105880/ENSG00000105997/ENSG00000120093/ENSG00000198353/ENSG00000115507/ENSG00000117707/ENSG00000052850/ENSG00000101144/ENSG00000163064/ENSG00000066468/ENSG00000103241/ENSG00000158055/ENSG00000120075/ENSG00000163132/ENSG00000007372/ENSG00000164093/ENSG00000057657/ENSG00000119042/ENSG00000168779/ENSG00000166949/ENSG00000176887/ENSG00000092607/ENSG00000137203/ENSG00000232810…	128
GO:0061448	connective tissue development	85/2947	262/20870	2.74177e-14	2.4907e-11	2.07921e-11	ENSG00000105997/ENSG00000120093/ENSG00000107796/ENSG00000150347/ENSG00000101144/ENSG00000163132/ENSG00000069011/ENSG00000160801/ENSG00000119042/ENSG00000145423/ENSG00000168779/ENSG00000148339/ENSG00000166949/ENSG00000134532/ENSG00000137573/ENSG00000114251/ENSG00000184937/ENSG00000151388/ENSG00000184675/ENSG00000197043/ENSG00000113369/ENSG00000165240/ENSG00000125378/ENSG00000138696/ENSG00000142871…	85
GO:0003002	regionalization	102/2947	352/20870	2.6839e-13	2.13337e-10	1.78091e-10	ENSG00000180613/ENSG00000185551/ENSG00000105997/ENSG00000120093/ENSG00000198353/ENSG00000115507/ENSG00000052850/ENSG00000169083/ENSG00000163064/ENSG00000066468/ENSG00000103241/ENSG00000120075/ENSG00000163132/ENSG00000118257/ENSG00000007372/ENSG00000164093/ENSG00000204227/ENSG00000145423/ENSG00000166949/ENSG00000114251/ENSG00000184937/ENSG00000136754/ENSG00000205336/ENSG00000128918/ENSG00000182220…	102
GO:0035107	appendage morphogenesis	55/2947	149/20870	3.22458e-12	2.05051e-09	1.71174e-09	ENSG00000105880/ENSG00000217236/ENSG00000089225/ENSG00000052850/ENSG00000101144/ENSG00000163064/ENSG00000066468/ENSG00000163132/ENSG00000069011/ENSG00000145423/ENSG00000168779/ENSG00000176887/ENSG00000137203/ENSG00000114251/ENSG00000128918/ENSG00000030110/ENSG00000125378/ENSG00000138696/ENSG00000168014/ENSG00000006377/ENSG00000187240/ENSG00000070193/ENSG00000248905/ENSG00000164930/ENSG00000106571…	55
GO:0035108	limb morphogenesis	55/2947	149/20870	3.22458e-12	2.05051e-09	1.71174e-09	ENSG00000105880/ENSG00000217236/ENSG00000089225/ENSG00000052850/ENSG00000101144/ENSG00000163064/ENSG00000066468/ENSG00000163132/ENSG00000069011/ENSG00000145423/ENSG00000168779/ENSG00000176887/ENSG00000137203/ENSG00000114251/ENSG00000128918/ENSG00000030110/ENSG00000125378/ENSG00000138696/ENSG00000168014/ENSG00000006377/ENSG00000187240/ENSG00000070193/ENSG00000248905/ENSG00000164930/ENSG00000106571…	55
GO:0001655	urogenital system development	100/2947	359/20870	6.17769e-12	3.57127e-09	2.98125e-09	ENSG00000091831/ENSG00000117707/ENSG00000078900/ENSG00000107796/ENSG00000178301/ENSG00000167580/ENSG00000169083/ENSG00000150347/ENSG00000101144/ENSG00000066468/ENSG00000103241/ENSG00000057657/ENSG00000166949/ENSG00000176887/ENSG00000137573/ENSG00000137203/ENSG00000114251/ENSG00000184937/ENSG00000145536/ENSG00000049192/ENSG00000135744/ENSG00000128918/ENSG00000179593/ENSG00000184675/ENSG00000154188…	100
GO:0048736	appendage development	62/2947	183/20870	1.04531e-11	5.1132e-09	4.26844e-09	ENSG00000185551/ENSG00000105880/ENSG00000217236/ENSG00000089225/ENSG00000052850/ENSG00000101144/ENSG00000163064/ENSG00000066468/ENSG00000163132/ENSG00000069011/ENSG00000164093/ENSG00000145423/ENSG00000168779/ENSG00000176887/ENSG00000137203/ENSG00000114251/ENSG00000128918/ENSG00000030110/ENSG00000125378/ENSG00000138696/ENSG00000168014/ENSG00000006377/ENSG00000187240/ENSG00000070193/ENSG00000248905…	62
GO:0060173	limb development	62/2947	183/20870	1.04531e-11	5.1132e-09	4.26844e-09	ENSG00000185551/ENSG00000105880/ENSG00000217236/ENSG00000089225/ENSG00000052850/ENSG00000101144/ENSG00000163064/ENSG00000066468/ENSG00000163132/ENSG00000069011/ENSG00000164093/ENSG00000145423/ENSG00000168779/ENSG00000176887/ENSG00000137203/ENSG00000114251/ENSG00000128918/ENSG00000030110/ENSG00000125378/ENSG00000138696/ENSG00000168014/ENSG00000006377/ENSG00000187240/ENSG00000070193/ENSG00000248905…	62
GO:0048732	gland development	124/2947	486/20870	1.38873e-11	6.26314e-09	5.2284e-09	ENSG00000091831/ENSG00000105997/ENSG00000120093/ENSG00000196498/ENSG00000204301/ENSG00000117707/ENSG00000169083/ENSG00000150347/ENSG00000101144/ENSG00000110092/ENSG00000204580/ENSG00000066468/ENSG00000103241/ENSG00000101680/ENSG00000163132/ENSG00000007372/ENSG00000069011/ENSG00000164093/ENSG00000166949/ENSG00000134595/ENSG00000137573/ENSG00000232810/ENSG00000114251/ENSG00000184937/ENSG00000160224…	124
GO:0007409	axonogenesis	116/2947	445/20870	1.47739e-11	6.26314e-09	5.2284e-09	ENSG00000105880/ENSG00000151150/ENSG00000176697/ENSG00000101144/ENSG00000174672/ENSG00000106038/ENSG00000066468/ENSG00000101680/ENSG00000106683/ENSG00000072518/ENSG00000100503/ENSG00000118257/ENSG00000179915/ENSG00000007372/ENSG00000073921/ENSG00000182175/ENSG00000012171/ENSG00000168779/ENSG00000182606/ENSG00000114251/ENSG00000164742/ENSG00000101126/ENSG00000170017/ENSG00000166313/ENSG00000004848…	116
GO:0010975	regulation of neuron projection development	120/2947	467/20870	1.81229e-11	7.20273e-09	6.01275e-09	ENSG00000135298/ENSG00000176697/ENSG00000101144/ENSG00000174672/ENSG00000257923/ENSG00000162374/ENSG00000162676/ENSG00000106683/ENSG00000072518/ENSG00000100503/ENSG00000175745/ENSG00000182175/ENSG00000012171/ENSG00000145423/ENSG00000168779/ENSG00000218336/ENSG00000182606/ENSG00000114251/ENSG00000138443/ENSG00000143322/ENSG00000101126/ENSG00000135744/ENSG00000166313/ENSG00000006740/ENSG00000175866…	120
GO:0072001	renal system development	91/2947	322/20870	2.33509e-11	8.73459e-09	7.29154e-09	ENSG00000117707/ENSG00000078900/ENSG00000107796/ENSG00000178301/ENSG00000167580/ENSG00000150347/ENSG00000101144/ENSG00000066468/ENSG00000103241/ENSG00000057657/ENSG00000166949/ENSG00000176887/ENSG00000137573/ENSG00000137203/ENSG00000114251/ENSG00000184937/ENSG00000145536/ENSG00000049192/ENSG00000135744/ENSG00000128918/ENSG00000184675/ENSG00000154188/ENSG00000091879/ENSG00000117362/ENSG00000171456…	91
GO:0051216	cartilage development	65/2947	200/20870	2.6659e-11	9.41804e-09	7.86207e-09	ENSG00000105997/ENSG00000120093/ENSG00000101144/ENSG00000163132/ENSG00000069011/ENSG00000160801/ENSG00000119042/ENSG00000145423/ENSG00000168779/ENSG00000166949/ENSG00000134532/ENSG00000137573/ENSG00000114251/ENSG00000151388/ENSG00000197043/ENSG00000165240/ENSG00000125378/ENSG00000138696/ENSG00000142871/ENSG00000131873/ENSG00000060718/ENSG00000108821/ENSG00000143387/ENSG00000078401/ENSG00000068078…	65
GO:0061564	axon development	125/2947	500/20870	4.90591e-11	1.64193e-08	1.37066e-08	ENSG00000105880/ENSG00000151150/ENSG00000176697/ENSG00000101144/ENSG00000174672/ENSG00000204580/ENSG00000106038/ENSG00000066468/ENSG00000101680/ENSG00000106683/ENSG00000072518/ENSG00000100503/ENSG00000118257/ENSG00000179915/ENSG00000007372/ENSG00000073921/ENSG00000182175/ENSG00000012171/ENSG00000168779/ENSG00000182606/ENSG00000114251/ENSG00000164742/ENSG00000101126/ENSG00000170017/ENSG00000166313…	125
GO:0003170	heart valve development	32/2947	68/20870	7.27611e-11	2.31344e-08	1.93123e-08	ENSG00000089225/ENSG00000163638/ENSG00000057657/ENSG00000168779/ENSG00000125378/ENSG00000142871/ENSG00000128917/ENSG00000049540/ENSG00000138080/ENSG00000136574/ENSG00000265107/ENSG00000135547/ENSG00000163909/ENSG00000015479/ENSG00000135679/ENSG00000081189/ENSG00000131196/ENSG00000183072/ENSG00000164867/ENSG00000186642/ENSG00000168214/ENSG00000169855/ENSG00000185008/ENSG00000067900/ENSG00000019549…	32
GO:0009952	anterior/posterior pattern specification	67/2947	214/20870	8.47665e-11	2.56681e-08	2.14274e-08	ENSG00000185551/ENSG00000105997/ENSG00000120093/ENSG00000198353/ENSG00000115507/ENSG00000052850/ENSG00000163064/ENSG00000103241/ENSG00000120075/ENSG00000163132/ENSG00000007372/ENSG00000204227/ENSG00000145423/ENSG00000166949/ENSG00000114251/ENSG00000184937/ENSG00000136754/ENSG00000128918/ENSG00000182220/ENSG00000168283/ENSG00000125378/ENSG00000090932/ENSG00000170370/ENSG00000157557/ENSG00000128610…	67
GO:0030326	embryonic limb morphogenesis	46/2947	127/20870	3.88297e-10	9.92997e-08	8.28942e-08	ENSG00000105880/ENSG00000217236/ENSG00000089225/ENSG00000052850/ENSG00000101144/ENSG00000163064/ENSG00000163132/ENSG00000069011/ENSG00000145423/ENSG00000168779/ENSG00000137203/ENSG00000114251/ENSG00000128918/ENSG00000125378/ENSG00000168014/ENSG00000006377/ENSG00000187240/ENSG00000164930/ENSG00000106571/ENSG00000147257/ENSG00000083307/ENSG00000164107/ENSG00000116478/ENSG00000253293/ENSG00000078399…	46
GO:0035113	embryonic appendage morphogenesis	46/2947	127/20870	3.88297e-10	9.92997e-08	8.28942e-08	ENSG00000105880/ENSG00000217236/ENSG00000089225/ENSG00000052850/ENSG00000101144/ENSG00000163064/ENSG00000163132/ENSG00000069011/ENSG00000145423/ENSG00000168779/ENSG00000137203/ENSG00000114251/ENSG00000128918/ENSG00000125378/ENSG00000168014/ENSG00000006377/ENSG00000187240/ENSG00000164930/ENSG00000106571/ENSG00000147257/ENSG00000083307/ENSG00000164107/ENSG00000116478/ENSG00000253293/ENSG00000078399…	46
GO:0060485	mesenchyme development	85/2947	308/20870	3.88679e-10	9.92997e-08	8.28942e-08	ENSG00000204301/ENSG00000089225/ENSG00000107796/ENSG00000101144/ENSG00000163539/ENSG00000066468/ENSG00000103241/ENSG00000144730/ENSG00000115318/ENSG00000163132/ENSG00000118257/ENSG00000164093/ENSG00000012171/ENSG00000145423/ENSG00000166949/ENSG00000176887/ENSG00000114251/ENSG00000184937/ENSG00000163017/ENSG00000128918/ENSG00000184675/ENSG00000197043/ENSG00000125378/ENSG00000108821/ENSG00000110880…	85
GO:0001822	kidney development	86/2947	313/20870	3.9039e-10	9.92997e-08	8.28942e-08	ENSG00000117707/ENSG00000078900/ENSG00000107796/ENSG00000178301/ENSG00000167580/ENSG00000150347/ENSG00000101144/ENSG00000066468/ENSG00000057657/ENSG00000166949/ENSG00000176887/ENSG00000137573/ENSG00000137203/ENSG00000114251/ENSG00000184937/ENSG00000145536/ENSG00000049192/ENSG00000135744/ENSG00000128918/ENSG00000184675/ENSG00000154188/ENSG00000091879/ENSG00000117362/ENSG00000171456/ENSG00000125378…	86
GO:0031346	positive regulation of cell projection organization	98/2947	376/20870	5.6452e-10	1.38069e-07	1.15258e-07	ENSG00000102606/ENSG00000176697/ENSG00000101144/ENSG00000257923/ENSG00000162374/ENSG00000068024/ENSG00000106683/ENSG00000072518/ENSG00000100503/ENSG00000182175/ENSG00000184640/ENSG00000168779/ENSG00000218336/ENSG00000182606/ENSG00000114251/ENSG00000138443/ENSG00000143322/ENSG00000101126/ENSG00000135744/ENSG00000166313/ENSG00000134982/ENSG00000186635/ENSG00000165240/ENSG00000175866/ENSG00000198908…	98
GO:0034329	cell junction assembly	113/2947	457/20870	8.33267e-10	1.9625e-07	1.63827e-07	ENSG00000146555/ENSG00000141556/ENSG00000089225/ENSG00000135298/ENSG00000145362/ENSG00000047648/ENSG00000102606/ENSG00000176697/ENSG00000163539/ENSG00000064042/ENSG00000165379/ENSG00000164877/ENSG00000179915/ENSG00000166949/ENSG00000232810/ENSG00000114251/ENSG00000087085/ENSG00000101126/ENSG00000135744/ENSG00000134982/ENSG00000186716/ENSG00000198908/ENSG00000040731/ENSG00000154162/ENSG00000145526…	113
GO:0050808	synapse organization	116/2947	477/20870	1.43052e-09	3.24881e-07	2.71207e-07	ENSG00000146555/ENSG00000135298/ENSG00000151150/ENSG00000176697/ENSG00000165379/ENSG00000118257/ENSG00000179915/ENSG00000232810/ENSG00000114251/ENSG00000138443/ENSG00000087085/ENSG00000101126/ENSG00000163697/ENSG00000128805/ENSG00000006740/ENSG00000175866/ENSG00000198908/ENSG00000173369/ENSG00000165985/ENSG00000165995/ENSG00000182389/ENSG00000058404/ENSG00000110888/ENSG00000158258/ENSG00000139182…	116
GO:0045664	regulation of neuron differentiation	61/2947	201/20870	2.27957e-09	4.99855e-07	4.17274e-07	ENSG00000117707/ENSG00000078900/ENSG00000176697/ENSG00000101144/ENSG00000130940/ENSG00000143995/ENSG00000007372/ENSG00000145423/ENSG00000176887/ENSG00000134595/ENSG00000196628/ENSG00000140836/ENSG00000113916/ENSG00000125378/ENSG00000162670/ENSG00000242689/ENSG00000141551/ENSG00000213923/ENSG00000107562/ENSG00000173406/ENSG00000204624/ENSG00000144355/ENSG00000092964/ENSG00000135144/ENSG00000114346…	61
GO:0051960	regulation of nervous system development	116/2947	482/20870	2.73846e-09	5.80462e-07	4.84563e-07	ENSG00000180613/ENSG00000120093/ENSG00000078900/ENSG00000135298/ENSG00000176697/ENSG00000101144/ENSG00000257923/ENSG00000106683/ENSG00000100503/ENSG00000179915/ENSG00000007372/ENSG00000182175/ENSG00000012171/ENSG00000168779/ENSG00000176887/ENSG00000232810/ENSG00000182606/ENSG00000114251/ENSG00000101126/ENSG00000175866/ENSG00000198908/ENSG00000058404/ENSG00000110888/ENSG00000179242/ENSG00000143418…	116
GO:0042476	odontogenesis	46/2947	134/20870	2.89085e-09	5.92998e-07	4.95028e-07	ENSG00000167522/ENSG00000198807/ENSG00000101144/ENSG00000066468/ENSG00000163132/ENSG00000164093/ENSG00000137203/ENSG00000240583/ENSG00000183337/ENSG00000125378/ENSG00000174059/ENSG00000108821/ENSG00000164692/ENSG00000184371/ENSG00000119535/ENSG00000144355/ENSG00000152592/ENSG00000064218/ENSG00000158813/ENSG00000078401/ENSG00000108950/ENSG00000177706/ENSG00000070193/ENSG00000054598/ENSG00000106571…	46
GO:0030900	forebrain development	102/2947	412/20870	5.12612e-09	1.01866e-06	8.50362e-07	ENSG00000180613/ENSG00000185551/ENSG00000105880/ENSG00000115507/ENSG00000117707/ENSG00000162374/ENSG00000066468/ENSG00000159217/ENSG00000163132/ENSG00000100503/ENSG00000118257/ENSG00000007372/ENSG00000069011/ENSG00000164093/ENSG00000119042/ENSG00000134595/ENSG00000114251/ENSG00000205336/ENSG00000128918/ENSG00000184254/ENSG00000240583/ENSG00000004848/ENSG00000165240/ENSG00000166780/ENSG00000125378…	102
GO:0003205	cardiac chamber development	52/2947	166/20870	1.03412e-08	1.99272e-06	1.6635e-06	ENSG00000117707/ENSG00000089225/ENSG00000145362/ENSG00000101144/ENSG00000066468/ENSG00000103241/ENSG00000118257/ENSG00000057657/ENSG00000145423/ENSG00000168779/ENSG00000176887/ENSG00000114251/ENSG00000049192/ENSG00000125378/ENSG00000142871/ENSG00000060718/ENSG00000128917/ENSG00000054598/ENSG00000160973/ENSG00000166225/ENSG00000136574/ENSG00000265107/ENSG00000083307/ENSG00000164107/ENSG00000135547…	52
GO:0002062	chondrocyte differentiation	39/2947	109/20870	1.21839e-08	2.27874e-06	1.90227e-06	ENSG00000160801/ENSG00000145423/ENSG00000168779/ENSG00000166949/ENSG00000134532/ENSG00000137573/ENSG00000151388/ENSG00000197043/ENSG00000125378/ENSG00000138696/ENSG00000131873/ENSG00000060718/ENSG00000068078/ENSG00000106571/ENSG00000149948/ENSG00000081189/ENSG00000116604/ENSG00000150051/ENSG00000272573/ENSG00000147862/ENSG00000109705/ENSG00000143867/ENSG00000164920/ENSG00000077092/ENSG00000159216…	39
GO:0048645	animal organ formation	28/2947	65/20870	1.30113e-08	2.30137e-06	1.92116e-06	ENSG00000105997/ENSG00000089225/ENSG00000169083/ENSG00000101144/ENSG00000066468/ENSG00000137573/ENSG00000114251/ENSG00000184937/ENSG00000125378/ENSG00000104313/ENSG00000113578/ENSG00000070193/ENSG00000160973/ENSG00000166225/ENSG00000168621/ENSG00000106571/ENSG00000164107/ENSG00000016082/ENSG00000081189/ENSG00000109705/ENSG00000225950/ENSG00000125618/ENSG00000168214/ENSG00000121039/ENSG00000169855…	28
GO:0001763	morphogenesis of a branching structure	64/2947	224/20870	1.30287e-08	2.30137e-06	1.92116e-06	ENSG00000091831/ENSG00000204301/ENSG00000117707/ENSG00000169083/ENSG00000101144/ENSG00000204580/ENSG00000066468/ENSG00000103241/ENSG00000101680/ENSG00000057657/ENSG00000145423/ENSG00000168779/ENSG00000137573/ENSG00000232810/ENSG00000114251/ENSG00000184937/ENSG00000145536/ENSG00000135744/ENSG00000125378/ENSG00000125931/ENSG00000169504/ENSG00000187498/ENSG00000184371/ENSG00000183117/ENSG00000128917…	64
GO:0060537	muscle tissue development	104/2947	432/20870	1.76855e-08	3.03952e-06	2.53735e-06	ENSG00000185551/ENSG00000117707/ENSG00000089225/ENSG00000078900/ENSG00000163638/ENSG00000101144/ENSG00000066468/ENSG00000068024/ENSG00000143995/ENSG00000163132/ENSG00000069011/ENSG00000168779/ENSG00000166949/ENSG00000176887/ENSG00000144560/ENSG00000114251/ENSG00000184937/ENSG00000120907/ENSG00000135744/ENSG00000170776/ENSG00000128918/ENSG00000198796/ENSG00000100628/ENSG00000116128/ENSG00000125378…	104
GO:0045165	cell fate commitment	77/2947	291/20870	1.91904e-08	3.21137e-06	2.68081e-06	ENSG00000180613/ENSG00000185551/ENSG00000204301/ENSG00000117707/ENSG00000089225/ENSG00000169083/ENSG00000066468/ENSG00000115318/ENSG00000007372/ENSG00000069011/ENSG00000057657/ENSG00000119042/ENSG00000145423/ENSG00000134532/ENSG00000092607/ENSG00000114251/ENSG00000184937/ENSG00000134982/ENSG00000004848/ENSG00000143032/ENSG00000125378/ENSG00000198730/ENSG00000135047/ENSG00000128917/ENSG00000144355…	77
GO:0014706	striated muscle tissue development	100/2947	412/20870	2.13585e-08	3.47405e-06	2.9001e-06	ENSG00000185551/ENSG00000117707/ENSG00000089225/ENSG00000078900/ENSG00000163638/ENSG00000101144/ENSG00000066468/ENSG00000068024/ENSG00000143995/ENSG00000163132/ENSG00000069011/ENSG00000168779/ENSG00000166949/ENSG00000176887/ENSG00000144560/ENSG00000114251/ENSG00000184937/ENSG00000120907/ENSG00000135744/ENSG00000170776/ENSG00000128918/ENSG00000198796/ENSG00000100628/ENSG00000116128/ENSG00000125378…	100
GO:0003151	outflow tract morphogenesis	30/2947	74/20870	2.18528e-08	3.47405e-06	2.9001e-06	ENSG00000101144/ENSG00000066468/ENSG00000118257/ENSG00000164093/ENSG00000145423/ENSG00000176887/ENSG00000114251/ENSG00000125378/ENSG00000049540/ENSG00000104313/ENSG00000054598/ENSG00000160973/ENSG00000265107/ENSG00000164107/ENSG00000135547/ENSG00000163909/ENSG00000016082/ENSG00000081189/ENSG00000183072/ENSG00000164128/ENSG00000197702/ENSG00000004399/ENSG00000168214/ENSG00000169855/ENSG00000185008…	30
GO:0043010	camera-type eye development	88/2947	351/20870	3.05566e-08	4.73926e-06	3.95628e-06	ENSG00000146555/ENSG00000138061/ENSG00000117707/ENSG00000101144/ENSG00000197406/ENSG00000158055/ENSG00000102878/ENSG00000101680/ENSG00000143995/ENSG00000129535/ENSG00000007372/ENSG00000164093/ENSG00000126785/ENSG00000204227/ENSG00000148339/ENSG00000166949/ENSG00000176887/ENSG00000218336/ENSG00000137203/ENSG00000114251/ENSG00000184937/ENSG00000138443/ENSG00000087085/ENSG00000128918/ENSG00000184254…	88
GO:0003179	heart valve morphogenesis	25/2947	57/20870	5.01622e-08	7.5948e-06	6.34005e-06	ENSG00000089225/ENSG00000163638/ENSG00000125378/ENSG00000142871/ENSG00000128917/ENSG00000049540/ENSG00000138080/ENSG00000136574/ENSG00000265107/ENSG00000135547/ENSG00000163909/ENSG00000135679/ENSG00000081189/ENSG00000131196/ENSG00000183072/ENSG00000164867/ENSG00000169855/ENSG00000185008/ENSG00000067900/ENSG00000019549/ENSG00000124766/ENSG00000137868/ENSG00000092969/ENSG00000122691/ENSG00000179588	25
GO:1905314	semi-lunar valve development	21/2947	43/20870	5.92799e-08	8.76654e-06	7.31821e-06	ENSG00000125378/ENSG00000128917/ENSG00000049540/ENSG00000138080/ENSG00000136574/ENSG00000265107/ENSG00000135547/ENSG00000163909/ENSG00000131196/ENSG00000183072/ENSG00000164867/ENSG00000168214/ENSG00000169855/ENSG00000185008/ENSG00000067900/ENSG00000019549/ENSG00000137868/ENSG00000092969/ENSG00000067182/ENSG00000028137/ENSG00000122691	21
GO:0001654	eye development	97/2947	405/20870	6.90669e-08	9.98173e-06	8.33264e-06	ENSG00000146555/ENSG00000138061/ENSG00000117707/ENSG00000101144/ENSG00000197406/ENSG00000158055/ENSG00000102878/ENSG00000101680/ENSG00000143995/ENSG00000129535/ENSG00000007372/ENSG00000164093/ENSG00000057657/ENSG00000126785/ENSG00000204227/ENSG00000148339/ENSG00000166949/ENSG00000176887/ENSG00000218336/ENSG00000137203/ENSG00000114251/ENSG00000184937/ENSG00000138443/ENSG00000087085/ENSG00000128918…	97
GO:0007411	axon guidance	65/2947	239/20870	7.93562e-08	1.10206e-05	9.19988e-06	ENSG00000105880/ENSG00000176697/ENSG00000101144/ENSG00000106038/ENSG00000101680/ENSG00000118257/ENSG00000179915/ENSG00000007372/ENSG00000012171/ENSG00000114251/ENSG00000170017/ENSG00000004848/ENSG00000138696/ENSG00000179242/ENSG00000072832/ENSG00000107562/ENSG00000187323/ENSG00000092964/ENSG00000171587/ENSG00000143590/ENSG00000090776/ENSG00000142627/ENSG00000044524/ENSG00000080224/ENSG00000135333…	65
GO:0003279	cardiac septum development	37/2947	107/20870	7.97214e-08	1.10206e-05	9.19988e-06	ENSG00000117707/ENSG00000089225/ENSG00000145362/ENSG00000101144/ENSG00000066468/ENSG00000118257/ENSG00000057657/ENSG00000176887/ENSG00000114251/ENSG00000049192/ENSG00000125378/ENSG00000142871/ENSG00000166225/ENSG00000136574/ENSG00000265107/ENSG00000135547/ENSG00000163909/ENSG00000016082/ENSG00000015479/ENSG00000135679/ENSG00000070614/ENSG00000183072/ENSG00000197702/ENSG00000125618/ENSG00000186642…	37
GO:0061138	morphogenesis of a branching epithelium	59/2947	210/20870	9.08808e-08	1.2296e-05	1.02645e-05	ENSG00000091831/ENSG00000204301/ENSG00000117707/ENSG00000169083/ENSG00000101144/ENSG00000204580/ENSG00000066468/ENSG00000103241/ENSG00000101680/ENSG00000145423/ENSG00000137573/ENSG00000232810/ENSG00000114251/ENSG00000184937/ENSG00000145536/ENSG00000135744/ENSG00000125378/ENSG00000125931/ENSG00000169504/ENSG00000187498/ENSG00000184371/ENSG00000183117/ENSG00000128917/ENSG00000078401/ENSG00000151617…	59
GO:0097485	neuron projection guidance	65/2947	240/20870	9.40183e-08	1.24555e-05	1.03977e-05	ENSG00000105880/ENSG00000176697/ENSG00000101144/ENSG00000106038/ENSG00000101680/ENSG00000118257/ENSG00000179915/ENSG00000007372/ENSG00000012171/ENSG00000114251/ENSG00000170017/ENSG00000004848/ENSG00000138696/ENSG00000179242/ENSG00000072832/ENSG00000107562/ENSG00000187323/ENSG00000092964/ENSG00000171587/ENSG00000143590/ENSG00000090776/ENSG00000142627/ENSG00000044524/ENSG00000080224/ENSG00000135333…	65
GO:0150063	visual system development	97/2947	409/20870	1.13943e-07	1.47871e-05	1.23441e-05	ENSG00000146555/ENSG00000138061/ENSG00000117707/ENSG00000101144/ENSG00000197406/ENSG00000158055/ENSG00000102878/ENSG00000101680/ENSG00000143995/ENSG00000129535/ENSG00000007372/ENSG00000164093/ENSG00000057657/ENSG00000126785/ENSG00000204227/ENSG00000148339/ENSG00000166949/ENSG00000176887/ENSG00000218336/ENSG00000137203/ENSG00000114251/ENSG00000184937/ENSG00000138443/ENSG00000087085/ENSG00000128918…	97
GO:0048762	mesenchymal cell differentiation	67/2947	252/20870	1.28832e-07	1.63849e-05	1.36779e-05	ENSG00000204301/ENSG00000089225/ENSG00000101144/ENSG00000163539/ENSG00000066468/ENSG00000144730/ENSG00000115318/ENSG00000163132/ENSG00000118257/ENSG00000164093/ENSG00000012171/ENSG00000145423/ENSG00000166949/ENSG00000176887/ENSG00000114251/ENSG00000128918/ENSG00000184675/ENSG00000197043/ENSG00000125378/ENSG00000108821/ENSG00000110880/ENSG00000044090/ENSG00000153071/ENSG00000108654/ENSG00000078401…	67
GO:0045666	positive regulation of neuron differentiation	34/2947	96/20870	1.36725e-07	1.70477e-05	1.42312e-05	ENSG00000117707/ENSG00000101144/ENSG00000176887/ENSG00000196628/ENSG00000113916/ENSG00000125378/ENSG00000162670/ENSG00000141551/ENSG00000213923/ENSG00000107562/ENSG00000173406/ENSG00000144355/ENSG00000114346/ENSG00000114867/ENSG00000149557/ENSG00000128610/ENSG00000153266/ENSG00000078579/ENSG00000176165/ENSG00000179348/ENSG00000143869/ENSG00000163909/ENSG00000128652/ENSG00000177508/ENSG00000081189…	34
GO:0072132	mesenchyme morphogenesis	23/2947	52/20870	1.41644e-07	1.72713e-05	1.44179e-05	ENSG00000107796/ENSG00000101144/ENSG00000103241/ENSG00000163132/ENSG00000166949/ENSG00000114251/ENSG00000163017/ENSG00000131558/ENSG00000054598/ENSG00000135547/ENSG00000163909/ENSG00000016082/ENSG00000135679/ENSG00000136997/ENSG00000164867/ENSG00000143867/ENSG00000168214/ENSG00000169855/ENSG00000185008/ENSG00000019549/ENSG00000135111/ENSG00000092969/ENSG00000122691	23
GO:0003231	cardiac ventricle development	41/2947	127/20870	1.4395e-07	1.72713e-05	1.44179e-05	ENSG00000117707/ENSG00000089225/ENSG00000066468/ENSG00000103241/ENSG00000057657/ENSG00000145423/ENSG00000176887/ENSG00000114251/ENSG00000125378/ENSG00000142871/ENSG00000060718/ENSG00000128917/ENSG00000054598/ENSG00000160973/ENSG00000166225/ENSG00000136574/ENSG00000265107/ENSG00000083307/ENSG00000164107/ENSG00000135547/ENSG00000163909/ENSG00000016082/ENSG00000082482/ENSG00000015479/ENSG00000135679…	41
GO:0048880	sensory system development	99/2947	422/20870	1.47662e-07	1.73886e-05	1.45158e-05	ENSG00000146555/ENSG00000138061/ENSG00000117707/ENSG00000101144/ENSG00000197406/ENSG00000158055/ENSG00000102878/ENSG00000101680/ENSG00000143995/ENSG00000129535/ENSG00000007372/ENSG00000164093/ENSG00000057657/ENSG00000126785/ENSG00000204227/ENSG00000148339/ENSG00000166949/ENSG00000176887/ENSG00000218336/ENSG00000137203/ENSG00000114251/ENSG00000184937/ENSG00000138443/ENSG00000087085/ENSG00000128918…	99
GO:0060562	epithelial tube morphogenesis	90/2947	374/20870	1.61801e-07	1.87071e-05	1.56165e-05	ENSG00000204256/ENSG00000091831/ENSG00000204301/ENSG00000117707/ENSG00000169083/ENSG00000101144/ENSG00000204580/ENSG00000066468/ENSG00000103241/ENSG00000114861/ENSG00000158055/ENSG00000101680/ENSG00000182175/ENSG00000145423/ENSG00000166949/ENSG00000176887/ENSG00000232810/ENSG00000114251/ENSG00000184937/ENSG00000151388/ENSG00000145536/ENSG00000135744/ENSG00000108839/ENSG00000100628/ENSG00000125378…	90
GO:0007416	synapse assembly	54/2947	189/20870	1.72532e-07	1.95917e-05	1.63549e-05	ENSG00000146555/ENSG00000135298/ENSG00000176697/ENSG00000165379/ENSG00000179915/ENSG00000114251/ENSG00000087085/ENSG00000101126/ENSG00000198908/ENSG00000158258/ENSG00000139182/ENSG00000136279/ENSG00000187957/ENSG00000171587/ENSG00000103319/ENSG00000114867/ENSG00000135333/ENSG00000154928/ENSG00000178568/ENSG00000129682/ENSG00000185070/ENSG00000022355/ENSG00000145864/ENSG00000166206/ENSG00000113327…	54
GO:0001503	ossification	102/2947	440/20870	1.7812e-07	1.98713e-05	1.65883e-05	ENSG00000105880/ENSG00000101144/ENSG00000066468/ENSG00000068024/ENSG00000160801/ENSG00000119042/ENSG00000145423/ENSG00000168779/ENSG00000166949/ENSG00000176887/ENSG00000137203/ENSG00000232810/ENSG00000114251/ENSG00000087085/ENSG00000160710/ENSG00000110955/ENSG00000071553/ENSG00000183337/ENSG00000125378/ENSG00000138696/ENSG00000121691/ENSG00000142871/ENSG00000090539/ENSG00000131873/ENSG00000125931…	102
GO:0022612	gland morphogenesis	42/2947	133/20870	2.03037e-07	2.22605e-05	1.85828e-05	ENSG00000091831/ENSG00000117707/ENSG00000169083/ENSG00000101144/ENSG00000204580/ENSG00000066468/ENSG00000101680/ENSG00000007372/ENSG00000137573/ENSG00000232810/ENSG00000114251/ENSG00000125378/ENSG00000014216/ENSG00000003402/ENSG00000184371/ENSG00000183117/ENSG00000172817/ENSG00000158813/ENSG00000163435/ENSG00000142627/ENSG00000113578/ENSG00000070193/ENSG00000104760/ENSG00000166225/ENSG00000143869…	42
GO:0050767	regulation of neurogenesis	94/2947	398/20870	2.18113e-07	2.32732e-05	1.94282e-05	ENSG00000180613/ENSG00000120093/ENSG00000078900/ENSG00000176697/ENSG00000101144/ENSG00000257923/ENSG00000106683/ENSG00000100503/ENSG00000007372/ENSG00000182175/ENSG00000012171/ENSG00000168779/ENSG00000176887/ENSG00000232810/ENSG00000182606/ENSG00000114251/ENSG00000101126/ENSG00000175866/ENSG00000198908/ENSG00000058404/ENSG00000110888/ENSG00000179242/ENSG00000143418/ENSG00000044090/ENSG00000006210…	94
GO:2000027	regulation of animal organ morphogenesis	43/2947	138/20870	2.22504e-07	2.32732e-05	1.94282e-05	ENSG00000198807/ENSG00000169083/ENSG00000101144/ENSG00000158055/ENSG00000163132/ENSG00000145423/ENSG00000137573/ENSG00000232810/ENSG00000114251/ENSG00000184937/ENSG00000135744/ENSG00000196581/ENSG00000135299/ENSG00000142632/ENSG00000125378/ENSG00000174059/ENSG00000184371/ENSG00000164932/ENSG00000153071/ENSG00000064218/ENSG00000078401/ENSG00000113578/ENSG00000070193/ENSG00000166225/ENSG00000164930…	43
GO:0010976	positive regulation of neuron projection development	50/2947	171/20870	2.23253e-07	2.32732e-05	1.94282e-05	ENSG00000176697/ENSG00000101144/ENSG00000162374/ENSG00000072518/ENSG00000182175/ENSG00000218336/ENSG00000114251/ENSG00000143322/ENSG00000101126/ENSG00000135744/ENSG00000166313/ENSG00000175866/ENSG00000198908/ENSG00000058404/ENSG00000110888/ENSG00000003402/ENSG00000242689/ENSG00000006210/ENSG00000113758/ENSG00000136279/ENSG00000113657/ENSG00000146425/ENSG00000103319/ENSG00000044524/ENSG00000182511…	50
GO:0003007	heart morphogenesis	66/2947	251/20870	2.4796e-07	2.54319e-05	2.12302e-05	ENSG00000117707/ENSG00000089225/ENSG00000101144/ENSG00000066468/ENSG00000103241/ENSG00000163132/ENSG00000118257/ENSG00000164093/ENSG00000145423/ENSG00000168779/ENSG00000166949/ENSG00000176887/ENSG00000114251/ENSG00000128918/ENSG00000198796/ENSG00000100628/ENSG00000171456/ENSG00000125378/ENSG00000168014/ENSG00000142871/ENSG00000113163/ENSG00000060718/ENSG00000164741/ENSG00000128917/ENSG00000049540…	66
GO:0051962	positive regulation of nervous system development	76/2947	303/20870	2.55556e-07	2.57949e-05	2.15333e-05	ENSG00000180613/ENSG00000078900/ENSG00000135298/ENSG00000176697/ENSG00000257923/ENSG00000106683/ENSG00000100503/ENSG00000179915/ENSG00000007372/ENSG00000168779/ENSG00000176887/ENSG00000232810/ENSG00000182606/ENSG00000101126/ENSG00000175866/ENSG00000198908/ENSG00000058404/ENSG00000110888/ENSG00000179242/ENSG00000158258/ENSG00000139182/ENSG00000044090/ENSG00000006210/ENSG00000107562/ENSG00000113758…	76
GO:0010092	specification of animal organ identity	18/2947	36/20870	3.34042e-07	3.31902e-05	2.77068e-05	ENSG00000169083/ENSG00000066468/ENSG00000114251/ENSG00000125378/ENSG00000113578/ENSG00000070193/ENSG00000160973/ENSG00000166225/ENSG00000168621/ENSG00000106571/ENSG00000016082/ENSG00000081189/ENSG00000125618/ENSG00000168214/ENSG00000169855/ENSG00000185008/ENSG00000164056/ENSG00000136535	18
GO:0003281	ventricular septum development	28/2947	74/20870	3.5684e-07	3.48579e-05	2.9099e-05	ENSG00000117707/ENSG00000089225/ENSG00000066468/ENSG00000057657/ENSG00000176887/ENSG00000114251/ENSG00000125378/ENSG00000142871/ENSG00000166225/ENSG00000136574/ENSG00000265107/ENSG00000135547/ENSG00000163909/ENSG00000015479/ENSG00000135679/ENSG00000183072/ENSG00000125618/ENSG00000186642/ENSG00000168214/ENSG00000169855/ENSG00000185008/ENSG00000103449/ENSG00000124766/ENSG00000137868/ENSG00000135111…	28
GO:0043583	ear development	62/2947	233/20870	3.6179e-07	3.48579e-05	2.9099e-05	ENSG00000105880/ENSG00000115507/ENSG00000117707/ENSG00000204580/ENSG00000066468/ENSG00000158055/ENSG00000163132/ENSG00000137203/ENSG00000114251/ENSG00000184254/ENSG00000125378/ENSG00000104327/ENSG00000136280/ENSG00000111276/ENSG00000060718/ENSG00000164932/ENSG00000006377/ENSG00000078401/ENSG00000104413/ENSG00000119715/ENSG00000104313/ENSG00000112319/ENSG00000070193/ENSG00000078579/ENSG00000176165…	62
GO:0003206	cardiac chamber morphogenesis	39/2947	123/20870	4.84974e-07	4.60291e-05	3.84246e-05	ENSG00000117707/ENSG00000089225/ENSG00000101144/ENSG00000066468/ENSG00000103241/ENSG00000118257/ENSG00000145423/ENSG00000168779/ENSG00000176887/ENSG00000114251/ENSG00000125378/ENSG00000142871/ENSG00000060718/ENSG00000128917/ENSG00000054598/ENSG00000160973/ENSG00000136574/ENSG00000083307/ENSG00000164107/ENSG00000135547/ENSG00000163909/ENSG00000016082/ENSG00000135679/ENSG00000081189/ENSG00000183072…	39
GO:0048638	regulation of developmental growth	84/2947	351/20870	5.28735e-07	4.94445e-05	4.12757e-05	ENSG00000117707/ENSG00000089225/ENSG00000078900/ENSG00000169083/ENSG00000176697/ENSG00000197406/ENSG00000066468/ENSG00000106683/ENSG00000143995/ENSG00000182175/ENSG00000012171/ENSG00000144560/ENSG00000114251/ENSG00000184937/ENSG00000076555/ENSG00000101126/ENSG00000004848/ENSG00000143032/ENSG00000125378/ENSG00000134057/ENSG00000179242/ENSG00000111276/ENSG00000149187/ENSG00000184371/ENSG00000107562…	84
GO:0003283	atrial septum development	14/2947	24/20870	5.88676e-07	5.4252e-05	4.5289e-05	ENSG00000089225/ENSG00000145362/ENSG00000114251/ENSG00000142871/ENSG00000136574/ENSG00000265107/ENSG00000135547/ENSG00000016082/ENSG00000135679/ENSG00000183072/ENSG00000128602/ENSG00000124766/ENSG00000092969/ENSG00000179588	14
GO:0016358	dendrite development	68/2947	268/20870	6.83562e-07	6.20967e-05	5.18377e-05	ENSG00000146555/ENSG00000144711/ENSG00000135298/ENSG00000101144/ENSG00000257923/ENSG00000162374/ENSG00000159217/ENSG00000073921/ENSG00000182606/ENSG00000136754/ENSG00000138443/ENSG00000068366/ENSG00000006740/ENSG00000175866/ENSG00000198908/ENSG00000132640/ENSG00000058404/ENSG00000118200/ENSG00000110888/ENSG00000080644/ENSG00000107864/ENSG00000164796/ENSG00000044090/ENSG00000173406/ENSG00000113758…	68
GO:0021510	spinal cord development	34/2947	102/20870	7.06076e-07	6.32386e-05	5.27908e-05	ENSG00000180613/ENSG00000117707/ENSG00000115318/ENSG00000007372/ENSG00000176887/ENSG00000090539/ENSG00000173406/ENSG00000187323/ENSG00000128917/ENSG00000064218/ENSG00000187240/ENSG00000074266/ENSG00000179348/ENSG00000143869/ENSG00000168621/ENSG00000106571/ENSG00000169840/ENSG00000120068/ENSG00000128710/ENSG00000016082/ENSG00000121454/ENSG00000184634/ENSG00000277586/ENSG00000177468/ENSG00000092621…	34
GO:0035265	organ growth	54/2947	197/20870	7.36268e-07	6.50267e-05	5.42836e-05	ENSG00000091831/ENSG00000117707/ENSG00000089225/ENSG00000078900/ENSG00000169083/ENSG00000066468/ENSG00000143995/ENSG00000144560/ENSG00000184937/ENSG00000076555/ENSG00000120907/ENSG00000135744/ENSG00000170776/ENSG00000197043/ENSG00000004848/ENSG00000134057/ENSG00000162733/ENSG00000198563/ENSG00000139318/ENSG00000130829/ENSG00000078401/ENSG00000178568/ENSG00000070193/ENSG00000078579/ENSG00000068078…	54
GO:0048754	branching morphogenesis of an epithelial tube	50/2947	178/20870	8.48944e-07	7.39512e-05	6.17336e-05	ENSG00000091831/ENSG00000204301/ENSG00000169083/ENSG00000101144/ENSG00000204580/ENSG00000066468/ENSG00000103241/ENSG00000101680/ENSG00000145423/ENSG00000232810/ENSG00000114251/ENSG00000184937/ENSG00000145536/ENSG00000135744/ENSG00000125378/ENSG00000125931/ENSG00000169504/ENSG00000187498/ENSG00000184371/ENSG00000183117/ENSG00000128917/ENSG00000078401/ENSG00000151617/ENSG00000142627/ENSG00000104313…	50
GO:0030879	mammary gland development	45/2947	154/20870	8.97867e-07	7.71559e-05	6.44089e-05	ENSG00000091831/ENSG00000196498/ENSG00000204301/ENSG00000169083/ENSG00000110092/ENSG00000204580/ENSG00000066468/ENSG00000103241/ENSG00000163132/ENSG00000114251/ENSG00000171388/ENSG00000165240/ENSG00000125378/ENSG00000139618/ENSG00000014216/ENSG00000129596/ENSG00000184371/ENSG00000183117/ENSG00000102967/ENSG00000163435/ENSG00000142627/ENSG00000178568/ENSG00000070193/ENSG00000106571/ENSG00000125166…	45
GO:0021889	olfactory bulb interneuron differentiation	9/2947	11/20870	9.26583e-07	7.79158e-05	6.50432e-05	ENSG00000180613/ENSG00000105880/ENSG00000114251/ENSG00000004848/ENSG00000178568/ENSG00000169855/ENSG00000185008/ENSG00000103449/ENSG00000164853	9
GO:0003176	aortic valve development	18/2947	38/20870	9.31216e-07	7.79158e-05	6.50432e-05	ENSG00000125378/ENSG00000128917/ENSG00000049540/ENSG00000138080/ENSG00000136574/ENSG00000135547/ENSG00000163909/ENSG00000131196/ENSG00000183072/ENSG00000164867/ENSG00000168214/ENSG00000169855/ENSG00000185008/ENSG00000067900/ENSG00000019549/ENSG00000067182/ENSG00000028137/ENSG00000122691	18
GO:0072012	glomerulus vasculature development	14/2947	25/20870	1.16349e-06	9.60863e-05	8.02118e-05	ENSG00000107796/ENSG00000101144/ENSG00000184937/ENSG00000154188/ENSG00000091879/ENSG00000125378/ENSG00000174059/ENSG00000003402/ENSG00000177464/ENSG00000160712/ENSG00000143867/ENSG00000134853/ENSG00000118526/ENSG00000120156	14
GO:0021953	central nervous system neuron differentiation	48/2947	170/20870	1.18517e-06	9.66216e-05	8.06587e-05	ENSG00000180613/ENSG00000117707/ENSG00000162374/ENSG00000066468/ENSG00000100503/ENSG00000118257/ENSG00000007372/ENSG00000069667/ENSG00000119042/ENSG00000004848/ENSG00000165240/ENSG00000116254/ENSG00000187323/ENSG00000133083/ENSG00000128917/ENSG00000144355/ENSG00000064218/ENSG00000187240/ENSG00000135638/ENSG00000154928/ENSG00000135472/ENSG00000153266/ENSG00000176165/ENSG00000179348/ENSG00000143869…	48
GO:0003177	pulmonary valve development	13/2947	22/20870	1.22924e-06	9.89456e-05	8.25987e-05	ENSG00000125378/ENSG00000265107/ENSG00000135547/ENSG00000163909/ENSG00000131196/ENSG00000164867/ENSG00000168214/ENSG00000169855/ENSG00000185008/ENSG00000137868/ENSG00000092969/ENSG00000067182/ENSG00000028137	13
GO:0072006	nephron development	44/2947	151/20870	1.28435e-06	0.00010209	8.52233e-05	ENSG00000107796/ENSG00000178301/ENSG00000101144/ENSG00000137573/ENSG00000184937/ENSG00000145536/ENSG00000135744/ENSG00000154188/ENSG00000091879/ENSG00000171456/ENSG00000125378/ENSG00000104327/ENSG00000272398/ENSG00000174059/ENSG00000003402/ENSG00000125931/ENSG00000178568/ENSG00000104313/ENSG00000113578/ENSG00000248905/ENSG00000054598/ENSG00000168621/ENSG00000106571/ENSG00000147257/ENSG00000177464…	44
GO:0001764	neuron migration	46/2947	161/20870	1.3678e-06	0.000107381	8.96403e-05	ENSG00000185551/ENSG00000106038/ENSG00000072518/ENSG00000134369/ENSG00000118257/ENSG00000007372/ENSG00000119042/ENSG00000205336/ENSG00000004848/ENSG00000152092/ENSG00000143032/ENSG00000058404/ENSG00000187094/ENSG00000163394/ENSG00000006210/ENSG00000107562/ENSG00000173406/ENSG00000187323/ENSG00000133083/ENSG00000187957/ENSG00000128610/ENSG00000153266/ENSG00000129682/ENSG00000196924/ENSG00000185070…	46
GO:0045778	positive regulation of ossification	21/2947	50/20870	1.3986e-06	0.00010846	9.05409e-05	ENSG00000101144/ENSG00000166949/ENSG00000176887/ENSG00000137203/ENSG00000114251/ENSG00000125378/ENSG00000138696/ENSG00000142871/ENSG00000187608/ENSG00000133116/ENSG00000081189/ENSG00000143867/ENSG00000164920/ENSG00000101405/ENSG00000105894/ENSG00000183023/ENSG00000092969/ENSG00000119699/ENSG00000183160/ENSG00000169884/ENSG00000109906	21
GO:0090596	sensory organ morphogenesis	70/2947	284/20870	1.48083e-06	0.000113453	9.4709e-05	ENSG00000146555/ENSG00000105880/ENSG00000115507/ENSG00000117707/ENSG00000101144/ENSG00000197406/ENSG00000066468/ENSG00000158055/ENSG00000143995/ENSG00000163132/ENSG00000129535/ENSG00000007372/ENSG00000164093/ENSG00000057657/ENSG00000204227/ENSG00000176887/ENSG00000218336/ENSG00000137203/ENSG00000114251/ENSG00000138443/ENSG00000184254/ENSG00000030110/ENSG00000137936/ENSG00000125378/ENSG00000104327…	70
GO:0030198	extracellular matrix organization	82/2947	350/20870	1.77978e-06	0.000134733	0.000112474	ENSG00000168477/ENSG00000138061/ENSG00000163638/ENSG00000163539/ENSG00000204580/ENSG00000164318/ENSG00000103241/ENSG00000115318/ENSG00000145423/ENSG00000166949/ENSG00000137573/ENSG00000232810/ENSG00000184937/ENSG00000151388/ENSG00000138316/ENSG00000145536/ENSG00000145808/ENSG00000049192/ENSG00000135744/ENSG00000165240/ENSG00000091986/ENSG00000142871/ENSG00000003402/ENSG00000060718/ENSG00000187955…	82
GO:0061351	neural precursor cell proliferation	43/2947	148/20870	1.8366e-06	0.000137399	0.000114699	ENSG00000117707/ENSG00000066468/ENSG00000159217/ENSG00000007372/ENSG00000069667/ENSG00000134532/ENSG00000114251/ENSG00000205336/ENSG00000004848/ENSG00000006210/ENSG00000113758/ENSG00000204624/ENSG00000128917/ENSG00000116641/ENSG00000066629/ENSG00000135638/ENSG00000170370/ENSG00000154928/ENSG00000129682/ENSG00000196924/ENSG00000176165/ENSG00000166225/ENSG00000164930/ENSG00000179348/ENSG00000106571…	43
GO:0007517	muscle organ development	81/2947	345/20870	1.87911e-06	0.000138945	0.00011599	ENSG00000185551/ENSG00000164916/ENSG00000117707/ENSG00000052850/ENSG00000150347/ENSG00000066468/ENSG00000068024/ENSG00000163132/ENSG00000135903/ENSG00000069011/ENSG00000168779/ENSG00000166949/ENSG00000176887/ENSG00000114251/ENSG00000184937/ENSG00000140836/ENSG00000100628/ENSG00000116128/ENSG00000125378/ENSG00000003402/ENSG00000242689/ENSG00000060718/ENSG00000011465/ENSG00000108654/ENSG00000154309…	81
GO:0043062	extracellular structure organization	82/2947	351/20870	2.00593e-06	0.000146618	0.000122395	ENSG00000168477/ENSG00000138061/ENSG00000163638/ENSG00000163539/ENSG00000204580/ENSG00000164318/ENSG00000103241/ENSG00000115318/ENSG00000145423/ENSG00000166949/ENSG00000137573/ENSG00000232810/ENSG00000184937/ENSG00000151388/ENSG00000138316/ENSG00000145536/ENSG00000145808/ENSG00000049192/ENSG00000135744/ENSG00000165240/ENSG00000091986/ENSG00000142871/ENSG00000003402/ENSG00000060718/ENSG00000187955…	82
GO:1901888	regulation of cell junction assembly	60/2947	234/20870	2.09189e-06	0.000151163	0.000126189	ENSG00000089225/ENSG00000135298/ENSG00000047648/ENSG00000176697/ENSG00000163539/ENSG00000064042/ENSG00000165379/ENSG00000179915/ENSG00000166949/ENSG00000232810/ENSG00000114251/ENSG00000101126/ENSG00000135744/ENSG00000198908/ENSG00000163347/ENSG00000158258/ENSG00000139182/ENSG00000110880/ENSG00000164741/ENSG00000112679/ENSG00000103319/ENSG00000114867/ENSG00000142627/ENSG00000044524/ENSG00000135333…	60
GO:0045229	external encapsulating structure organization	82/2947	354/20870	2.8572e-06	0.000204145	0.000170418	ENSG00000168477/ENSG00000138061/ENSG00000163638/ENSG00000163539/ENSG00000204580/ENSG00000164318/ENSG00000103241/ENSG00000115318/ENSG00000145423/ENSG00000166949/ENSG00000137573/ENSG00000232810/ENSG00000184937/ENSG00000151388/ENSG00000138316/ENSG00000145536/ENSG00000145808/ENSG00000049192/ENSG00000135744/ENSG00000165240/ENSG00000091986/ENSG00000142871/ENSG00000003402/ENSG00000060718/ENSG00000187955…	82
GO:0050678	regulation of epithelial cell proliferation	91/2947	404/20870	2.92106e-06	0.000206389	0.000172291	ENSG00000185551/ENSG00000232040/ENSG00000105880/ENSG00000117707/ENSG00000178301/ENSG00000169083/ENSG00000110092/ENSG00000066468/ENSG00000118257/ENSG00000007372/ENSG00000141564/ENSG00000145423/ENSG00000166949/ENSG00000176887/ENSG00000137573/ENSG00000232810/ENSG00000114251/ENSG00000164022/ENSG00000128918/ENSG00000171388/ENSG00000165240/ENSG00000125378/ENSG00000139618/ENSG00000147044/ENSG00000111276…	91
GO:0042733	embryonic digit morphogenesis	22/2947	56/20870	3.03142e-06	0.000211833	0.000176836	ENSG00000052850/ENSG00000163132/ENSG00000145423/ENSG00000114251/ENSG00000125378/ENSG00000168014/ENSG00000164930/ENSG00000106571/ENSG00000083307/ENSG00000164107/ENSG00000116478/ENSG00000170178/ENSG00000128714/ENSG00000187535/ENSG00000134323/ENSG00000143867/ENSG00000164920/ENSG00000103449/ENSG00000146350/ENSG00000135111/ENSG00000122691/ENSG00000109906	22
GO:0003230	cardiac atrium development	17/2947	37/20870	3.1712e-06	0.000216883	0.000181051	ENSG00000117707/ENSG00000089225/ENSG00000145362/ENSG00000168779/ENSG00000114251/ENSG00000142871/ENSG00000128917/ENSG00000136574/ENSG00000265107/ENSG00000135547/ENSG00000016082/ENSG00000135679/ENSG00000183072/ENSG00000128602/ENSG00000124766/ENSG00000092969/ENSG00000179588	17
GO:0050673	epithelial cell proliferation	101/2947	461/20870	3.1719e-06	0.000216883	0.000181051	ENSG00000185551/ENSG00000232040/ENSG00000105880/ENSG00000091831/ENSG00000117707/ENSG00000178301/ENSG00000169083/ENSG00000110092/ENSG00000066468/ENSG00000118257/ENSG00000007372/ENSG00000141564/ENSG00000145423/ENSG00000166949/ENSG00000176887/ENSG00000137573/ENSG00000232810/ENSG00000114251/ENSG00000164022/ENSG00000128918/ENSG00000171388/ENSG00000165240/ENSG00000125378/ENSG00000139618/ENSG00000198663…	101
GO:0035136	forelimb morphogenesis	18/2947	41/20870	3.66791e-06	0.00024813	0.000207136	ENSG00000089225/ENSG00000052850/ENSG00000163064/ENSG00000163132/ENSG00000168779/ENSG00000137203/ENSG00000128918/ENSG00000248905/ENSG00000078399/ENSG00000128710/ENSG00000128709/ENSG00000143867/ENSG00000164920/ENSG00000121039/ENSG00000124813/ENSG00000135111/ENSG00000122691/ENSG00000109906	18
GO:0060411	cardiac septum morphogenesis	25/2947	69/20870	3.75251e-06	0.000251181	0.000209683	ENSG00000117707/ENSG00000089225/ENSG00000101144/ENSG00000066468/ENSG00000118257/ENSG00000176887/ENSG00000114251/ENSG00000125378/ENSG00000142871/ENSG00000136574/ENSG00000135547/ENSG00000163909/ENSG00000016082/ENSG00000135679/ENSG00000183072/ENSG00000197702/ENSG00000168214/ENSG00000169855/ENSG00000185008/ENSG00000128602/ENSG00000124766/ENSG00000135111/ENSG00000092969/ENSG00000179588/ENSG00000169946	25
GO:0061437	renal system vasculature development	14/2947	27/20870	3.961e-06	0.00025967	0.00021677	ENSG00000107796/ENSG00000101144/ENSG00000184937/ENSG00000154188/ENSG00000091879/ENSG00000125378/ENSG00000174059/ENSG00000003402/ENSG00000177464/ENSG00000160712/ENSG00000143867/ENSG00000134853/ENSG00000118526/ENSG00000120156	14
GO:0061440	kidney vasculature development	14/2947	27/20870	3.961e-06	0.00025967	0.00021677	ENSG00000107796/ENSG00000101144/ENSG00000184937/ENSG00000154188/ENSG00000091879/ENSG00000125378/ENSG00000174059/ENSG00000003402/ENSG00000177464/ENSG00000160712/ENSG00000143867/ENSG00000134853/ENSG00000118526/ENSG00000120156	14
GO:0050804	modulation of chemical synaptic transmission	106/2947	492/20870	4.07171e-06	0.000264204	0.000220555	ENSG00000176697/ENSG00000162374/ENSG00000196639/ENSG00000102468/ENSG00000179915/ENSG00000232810/ENSG00000159842/ENSG00000087085/ENSG00000164742/ENSG00000101126/ENSG00000120907/ENSG00000135744/ENSG00000131016/ENSG00000175866/ENSG00000186716/ENSG00000183092/ENSG00000168748/ENSG00000165995/ENSG00000104327/ENSG00000058404/ENSG00000147044/ENSG00000080644/ENSG00000169684/ENSG00000158258/ENSG00000139182…	106
GO:0099177	regulation of trans-synaptic signaling	106/2947	493/20870	4.47939e-06	0.000287721	0.000240187	ENSG00000176697/ENSG00000162374/ENSG00000196639/ENSG00000102468/ENSG00000179915/ENSG00000232810/ENSG00000159842/ENSG00000087085/ENSG00000164742/ENSG00000101126/ENSG00000120907/ENSG00000135744/ENSG00000131016/ENSG00000175866/ENSG00000186716/ENSG00000183092/ENSG00000168748/ENSG00000165995/ENSG00000104327/ENSG00000058404/ENSG00000147044/ENSG00000080644/ENSG00000169684/ENSG00000158258/ENSG00000139182…	106
GO:0060348	bone development	56/2947	219/20870	4.92494e-06	0.000313177	0.000261437	ENSG00000105880/ENSG00000066468/ENSG00000151702/ENSG00000114861/ENSG00000143995/ENSG00000163132/ENSG00000164093/ENSG00000145423/ENSG00000168779/ENSG00000137573/ENSG00000137203/ENSG00000136754/ENSG00000170776/ENSG00000184675/ENSG00000197043/ENSG00000171456/ENSG00000071553/ENSG00000125378/ENSG00000138696/ENSG00000131873/ENSG00000108821/ENSG00000068078/ENSG00000054598/ENSG00000106571/ENSG00000087460…	56
GO:0001823	mesonephros development	32/2947	101/20870	5.08451e-06	0.000317772	0.000265272	ENSG00000101144/ENSG00000066468/ENSG00000166949/ENSG00000184937/ENSG00000145536/ENSG00000135744/ENSG00000125378/ENSG00000104327/ENSG00000121691/ENSG00000125931/ENSG00000104313/ENSG00000113578/ENSG00000070193/ENSG00000248905/ENSG00000054598/ENSG00000168621/ENSG00000106571/ENSG00000147257/ENSG00000260027/ENSG00000136997/ENSG00000143867/ENSG00000164920/ENSG00000125618/ENSG00000131759/ENSG00000077092…	32
GO:0060349	bone morphogenesis	30/2947	92/20870	5.18061e-06	0.000317772	0.000265272	ENSG00000105880/ENSG00000066468/ENSG00000163132/ENSG00000145423/ENSG00000168779/ENSG00000137203/ENSG00000197043/ENSG00000125378/ENSG00000138696/ENSG00000131873/ENSG00000108821/ENSG00000068078/ENSG00000054598/ENSG00000106571/ENSG00000170961/ENSG00000081189/ENSG00000116604/ENSG00000164920/ENSG00000173868/ENSG00000131759/ENSG00000077092/ENSG00000124813/ENSG00000103056/ENSG00000204335/ENSG00000120156…	30
GO:0046620	regulation of organ growth	35/2947	115/20870	5.19708e-06	0.000317772	0.000265272	ENSG00000117707/ENSG00000089225/ENSG00000078900/ENSG00000066468/ENSG00000143995/ENSG00000144560/ENSG00000184937/ENSG00000076555/ENSG00000004848/ENSG00000134057/ENSG00000198563/ENSG00000139318/ENSG00000130829/ENSG00000078401/ENSG00000178568/ENSG00000078579/ENSG00000054598/ENSG00000160211/ENSG00000135547/ENSG00000136630/ENSG00000017427/ENSG00000167244/ENSG00000082482/ENSG00000143194/ENSG00000081189…	35
GO:0060419	heart growth	35/2947	115/20870	5.19708e-06	0.000317772	0.000265272	ENSG00000117707/ENSG00000089225/ENSG00000078900/ENSG00000066468/ENSG00000143995/ENSG00000144560/ENSG00000184937/ENSG00000076555/ENSG00000120907/ENSG00000135744/ENSG00000170776/ENSG00000134057/ENSG00000198563/ENSG00000139318/ENSG00000130829/ENSG00000078401/ENSG00000178568/ENSG00000078579/ENSG00000054598/ENSG00000160211/ENSG00000136574/ENSG00000135547/ENSG00000017427/ENSG00000082482/ENSG00000081189…	35
GO:0042692	muscle cell differentiation	92/2947	416/20870	5.74161e-06	0.000347723	0.000290275	ENSG00000061455/ENSG00000117707/ENSG00000089225/ENSG00000135298/ENSG00000145362/ENSG00000068650/ENSG00000176697/ENSG00000066468/ENSG00000103241/ENSG00000068024/ENSG00000163132/ENSG00000069667/ENSG00000168779/ENSG00000131634/ENSG00000184937/ENSG00000130402/ENSG00000120907/ENSG00000135744/ENSG00000170776/ENSG00000198796/ENSG00000100628/ENSG00000116128/ENSG00000125378/ENSG00000162909/ENSG00000134057…	92
GO:0032835	glomerulus development	23/2947	63/20870	7.83997e-06	0.000470324	0.000392621	ENSG00000107796/ENSG00000101144/ENSG00000137573/ENSG00000184937/ENSG00000154188/ENSG00000091879/ENSG00000171456/ENSG00000125378/ENSG00000272398/ENSG00000174059/ENSG00000003402/ENSG00000054598/ENSG00000177464/ENSG00000163909/ENSG00000160712/ENSG00000172037/ENSG00000081189/ENSG00000115204/ENSG00000143867/ENSG00000134853/ENSG00000196562/ENSG00000118526/ENSG00000120156	23
GO:0048738	cardiac muscle tissue development	62/2947	254/20870	7.98913e-06	0.000474793	0.000396352	ENSG00000117707/ENSG00000089225/ENSG00000078900/ENSG00000163638/ENSG00000101144/ENSG00000066468/ENSG00000143995/ENSG00000163132/ENSG00000168779/ENSG00000144560/ENSG00000114251/ENSG00000184937/ENSG00000120907/ENSG00000135744/ENSG00000170776/ENSG00000128918/ENSG00000198796/ENSG00000100628/ENSG00000125378/ENSG00000134057/ENSG00000060718/ENSG00000198563/ENSG00000128917/ENSG00000078401/ENSG00000178568…	62
GO:0031214	biomineral tissue development	48/2947	182/20870	9.3514e-06	0.000550607	0.00045964	ENSG00000101144/ENSG00000066468/ENSG00000160801/ENSG00000166949/ENSG00000137203/ENSG00000183337/ENSG00000125378/ENSG00000138696/ENSG00000142871/ENSG00000163815/ENSG00000108821/ENSG00000164692/ENSG00000162733/ENSG00000152592/ENSG00000108950/ENSG00000177706/ENSG00000068078/ENSG00000147257/ENSG00000135547/ENSG00000017427/ENSG00000187608/ENSG00000119185/ENSG00000133116/ENSG00000155090/ENSG00000174697…	48
GO:0031076	embryonic camera-type eye development	16/2947	36/20870	1.04864e-05	0.000611773	0.000510702	ENSG00000117707/ENSG00000101144/ENSG00000007372/ENSG00000176887/ENSG00000137203/ENSG00000114251/ENSG00000128918/ENSG00000184254/ENSG00000070193/ENSG00000166225/ENSG00000187535/ENSG00000131759/ENSG00000121039/ENSG00000172845/ENSG00000137868/ENSG00000122691	16
GO:0051963	regulation of synapse assembly	33/2947	109/20870	1.08005e-05	0.000623505	0.000520495	ENSG00000135298/ENSG00000176697/ENSG00000165379/ENSG00000179915/ENSG00000114251/ENSG00000101126/ENSG00000198908/ENSG00000158258/ENSG00000139182/ENSG00000103319/ENSG00000114867/ENSG00000135333/ENSG00000154928/ENSG00000185070/ENSG00000121853/ENSG00000158301/ENSG00000152208/ENSG00000173621/ENSG00000198739/ENSG00000081189/ENSG00000169760/ENSG00000169992/ENSG00000065320/ENSG00000198400/ENSG00000140538…	33
GO:0042481	regulation of odontogenesis	10/2947	16/20870	1.09817e-05	0.000623505	0.000520495	ENSG00000198807/ENSG00000163132/ENSG00000125378/ENSG00000174059/ENSG00000184371/ENSG00000064218/ENSG00000078401/ENSG00000124813/ENSG00000164761/ENSG00000135925	10
GO:0060413	atrial septum morphogenesis	10/2947	16/20870	1.09817e-05	0.000623505	0.000520495	ENSG00000089225/ENSG00000142871/ENSG00000136574/ENSG00000135547/ENSG00000016082/ENSG00000183072/ENSG00000128602/ENSG00000124766/ENSG00000092969/ENSG00000179588	10
GO:0010463	mesenchymal cell proliferation	17/2947	40/20870	1.15981e-05	0.000652677	0.000544847	ENSG00000101144/ENSG00000066468/ENSG00000103241/ENSG00000163132/ENSG00000168779/ENSG00000114251/ENSG00000125378/ENSG00000090539/ENSG00000147257/ENSG00000164107/ENSG00000160789/ENSG00000136997/ENSG00000134323/ENSG00000147862/ENSG00000143867/ENSG00000105894/ENSG00000128602	17
GO:0060541	respiratory system development	55/2947	220/20870	1.21438e-05	0.000677387	0.000565475	ENSG00000105880/ENSG00000117707/ENSG00000089225/ENSG00000066468/ENSG00000103241/ENSG00000101680/ENSG00000115318/ENSG00000159263/ENSG00000176887/ENSG00000232810/ENSG00000114251/ENSG00000184937/ENSG00000128918/ENSG00000184254/ENSG00000171456/ENSG00000165240/ENSG00000125378/ENSG00000154309/ENSG00000158813/ENSG00000187840/ENSG00000126767/ENSG00000113578/ENSG00000070193/ENSG00000102678/ENSG00000106571…	55
GO:0042471	ear morphogenesis	36/2947	124/20870	1.24844e-05	0.000690334	0.000576283	ENSG00000105880/ENSG00000115507/ENSG00000117707/ENSG00000066468/ENSG00000158055/ENSG00000163132/ENSG00000137203/ENSG00000114251/ENSG00000184254/ENSG00000060718/ENSG00000164932/ENSG00000006377/ENSG00000078401/ENSG00000104313/ENSG00000070193/ENSG00000176165/ENSG00000164930/ENSG00000179348/ENSG00000121742/ENSG00000133937/ENSG00000188620/ENSG00000105991/ENSG00000105996/ENSG00000105707/ENSG00000053918…	36
GO:0110148	biomineralization	48/2947	184/20870	1.28257e-05	0.000703091	0.000586932	ENSG00000101144/ENSG00000066468/ENSG00000160801/ENSG00000166949/ENSG00000137203/ENSG00000183337/ENSG00000125378/ENSG00000138696/ENSG00000142871/ENSG00000163815/ENSG00000108821/ENSG00000164692/ENSG00000162733/ENSG00000152592/ENSG00000108950/ENSG00000177706/ENSG00000068078/ENSG00000147257/ENSG00000135547/ENSG00000017427/ENSG00000187608/ENSG00000119185/ENSG00000133116/ENSG00000155090/ENSG00000174697…	48
GO:0010517	regulation of phospholipase activity	24/2947	69/20870	1.30513e-05	0.000709344	0.000592153	ENSG00000091831/ENSG00000047648/ENSG00000151746/ENSG00000066468/ENSG00000102468/ENSG00000143322/ENSG00000120907/ENSG00000135744/ENSG00000120805/ENSG00000142871/ENSG00000151617/ENSG00000068078/ENSG00000174775/ENSG00000064547/ENSG00000123384/ENSG00000171631/ENSG00000134853/ENSG00000167085/ENSG00000170890/ENSG00000153246/ENSG00000067606/ENSG00000116741/ENSG00000125910/ENSG00000074966	24
GO:0072073	kidney epithelium development	40/2947	144/20870	1.35902e-05	0.000732374	0.000611377	ENSG00000178301/ENSG00000101144/ENSG00000066468/ENSG00000166949/ENSG00000184937/ENSG00000145536/ENSG00000135744/ENSG00000171456/ENSG00000125378/ENSG00000104327/ENSG00000121691/ENSG00000272398/ENSG00000174059/ENSG00000125931/ENSG00000135333/ENSG00000104313/ENSG00000113578/ENSG00000248905/ENSG00000054598/ENSG00000168621/ENSG00000106571/ENSG00000147257/ENSG00000163909/ENSG00000260027/ENSG00000177508…	40
GO:0003180	aortic valve morphogenesis	15/2947	33/20870	1.41784e-05	0.000757649	0.000632476	ENSG00000125378/ENSG00000128917/ENSG00000049540/ENSG00000138080/ENSG00000136574/ENSG00000135547/ENSG00000163909/ENSG00000131196/ENSG00000183072/ENSG00000164867/ENSG00000169855/ENSG00000185008/ENSG00000067900/ENSG00000019549/ENSG00000122691	15
GO:0010810	regulation of cell-substrate adhesion	58/2947	238/20870	1.62253e-05	0.000859806	0.000717756	ENSG00000141556/ENSG00000047648/ENSG00000102606/ENSG00000163539/ENSG00000204580/ENSG00000164318/ENSG00000103241/ENSG00000064042/ENSG00000166949/ENSG00000130402/ENSG00000196581/ENSG00000091879/ENSG00000113916/ENSG00000109743/ENSG00000147044/ENSG00000091986/ENSG00000142871/ENSG00000108821/ENSG00000110880/ENSG00000184371/ENSG00000006210/ENSG00000164741/ENSG00000152592/ENSG00000079805/ENSG00000112679…	58
GO:0048863	stem cell differentiation	54/2947	217/20870	1.66934e-05	0.000877303	0.000732362	ENSG00000091831/ENSG00000089225/ENSG00000101144/ENSG00000066468/ENSG00000163132/ENSG00000118257/ENSG00000164093/ENSG00000012171/ENSG00000176887/ENSG00000134532/ENSG00000128918/ENSG00000197043/ENSG00000125378/ENSG00000110880/ENSG00000078401/ENSG00000151617/ENSG00000090776/ENSG00000178568/ENSG00000119715/ENSG00000054598/ENSG00000136574/ENSG00000168621/ENSG00000133937/ENSG00000164107/ENSG00000149948…	54
GO:0048663	neuron fate commitment	24/2947	70/20870	1.72211e-05	0.000897615	0.000749319	ENSG00000180613/ENSG00000007372/ENSG00000119042/ENSG00000125378/ENSG00000128917/ENSG00000144355/ENSG00000064218/ENSG00000104413/ENSG00000104313/ENSG00000153266/ENSG00000176165/ENSG00000179348/ENSG00000106571/ENSG00000169840/ENSG00000128710/ENSG00000016082/ENSG00000157168/ENSG00000140538/ENSG00000177468/ENSG00000184486/ENSG00000168214/ENSG00000136535/ENSG00000164438/ENSG00000125084	24
GO:0060324	face development	18/2947	45/20870	1.77116e-05	0.000908462	0.000758374	ENSG00000167522/ENSG00000105880/ENSG00000120093/ENSG00000198807/ENSG00000150347/ENSG00000163132/ENSG00000134595/ENSG00000114251/ENSG00000128918/ENSG00000184254/ENSG00000108821/ENSG00000121005/ENSG00000083307/ENSG00000087245/ENSG00000134853/ENSG00000131759/ENSG00000137868/ENSG00000119699	18
GO:0060420	regulation of heart growth	28/2947	88/20870	1.77149e-05	0.000908462	0.000758374	ENSG00000117707/ENSG00000089225/ENSG00000078900/ENSG00000066468/ENSG00000143995/ENSG00000144560/ENSG00000184937/ENSG00000076555/ENSG00000134057/ENSG00000198563/ENSG00000139318/ENSG00000130829/ENSG00000078401/ENSG00000178568/ENSG00000078579/ENSG00000160211/ENSG00000135547/ENSG00000017427/ENSG00000082482/ENSG00000081189/ENSG00000207752/ENSG00000129484/ENSG00000138207/ENSG00000168214/ENSG00000116741…	28
GO:0030282	bone mineralization	36/2947	126/20870	1.83924e-05	0.000935659	0.000781077	ENSG00000101144/ENSG00000066468/ENSG00000160801/ENSG00000166949/ENSG00000137203/ENSG00000183337/ENSG00000125378/ENSG00000138696/ENSG00000142871/ENSG00000163815/ENSG00000164692/ENSG00000162733/ENSG00000068078/ENSG00000147257/ENSG00000017427/ENSG00000187608/ENSG00000133116/ENSG00000155090/ENSG00000174697/ENSG00000081189/ENSG00000188554/ENSG00000143867/ENSG00000164920/ENSG00000173868/ENSG00000120899…	36
GO:0003209	cardiac atrium morphogenesis	14/2947	30/20870	1.89135e-05	0.000954534	0.000796834	ENSG00000117707/ENSG00000089225/ENSG00000168779/ENSG00000114251/ENSG00000142871/ENSG00000128917/ENSG00000136574/ENSG00000135547/ENSG00000016082/ENSG00000183072/ENSG00000128602/ENSG00000124766/ENSG00000092969/ENSG00000179588	14
GO:0060021	roof of mouth development	29/2947	93/20870	1.94534e-05	0.00097405	0.000813126	ENSG00000105880/ENSG00000052850/ENSG00000150347/ENSG00000115318/ENSG00000163132/ENSG00000119042/ENSG00000176887/ENSG00000137203/ENSG00000114251/ENSG00000183337/ENSG00000006377/ENSG00000166206/ENSG00000106571/ENSG00000164107/ENSG00000122641/ENSG00000117595/ENSG00000106511/ENSG00000178860/ENSG00000143867/ENSG00000164920/ENSG00000134853/ENSG00000146350/ENSG00000135111/ENSG00000118526/ENSG00000092969…	29
GO:0050769	positive regulation of neurogenesis	60/2947	251/20870	2.18018e-05	0.00108311	0.000904165	ENSG00000180613/ENSG00000078900/ENSG00000176697/ENSG00000257923/ENSG00000106683/ENSG00000100503/ENSG00000007372/ENSG00000168779/ENSG00000176887/ENSG00000232810/ENSG00000182606/ENSG00000101126/ENSG00000175866/ENSG00000198908/ENSG00000058404/ENSG00000110888/ENSG00000179242/ENSG00000044090/ENSG00000006210/ENSG00000107562/ENSG00000113758/ENSG00000136279/ENSG00000100697/ENSG00000171587/ENSG00000103319…	60
GO:0035115	embryonic forelimb morphogenesis	15/2947	34/20870	2.20663e-05	0.00108775	0.000908039	ENSG00000089225/ENSG00000052850/ENSG00000163064/ENSG00000163132/ENSG00000168779/ENSG00000137203/ENSG00000128918/ENSG00000078399/ENSG00000128709/ENSG00000143867/ENSG00000164920/ENSG00000121039/ENSG00000124813/ENSG00000135111/ENSG00000122691	15
GO:0021536	diencephalon development	26/2947	80/20870	2.30195e-05	0.00112601	0.000939977	ENSG00000115507/ENSG00000163132/ENSG00000118257/ENSG00000007372/ENSG00000069011/ENSG00000164093/ENSG00000134595/ENSG00000114251/ENSG00000128918/ENSG00000004848/ENSG00000125378/ENSG00000147571/ENSG00000070193/ENSG00000179348/ENSG00000169840/ENSG00000016082/ENSG00000169297/ENSG00000184486/ENSG00000165186/ENSG00000105894/ENSG00000134438/ENSG00000168214/ENSG00000103449/ENSG00000128602/ENSG00000170315…	26
GO:0031589	cell-substrate adhesion	87/2947	402/20870	2.41053e-05	0.00117012	0.000976801	ENSG00000168477/ENSG00000141556/ENSG00000163638/ENSG00000047648/ENSG00000102606/ENSG00000163539/ENSG00000204580/ENSG00000164318/ENSG00000103241/ENSG00000064042/ENSG00000164877/ENSG00000166949/ENSG00000130402/ENSG00000151388/ENSG00000196581/ENSG00000154188/ENSG00000091879/ENSG00000113916/ENSG00000186716/ENSG00000109743/ENSG00000147044/ENSG00000091986/ENSG00000142871/ENSG00000174059/ENSG00000153283…	87
GO:0003197	endocardial cushion development	18/2947	46/20870	2.52749e-05	0.0012176	0.00101644	ENSG00000089225/ENSG00000101144/ENSG00000103241/ENSG00000163132/ENSG00000125378/ENSG00000136574/ENSG00000135547/ENSG00000163909/ENSG00000016082/ENSG00000135679/ENSG00000164867/ENSG00000168214/ENSG00000169855/ENSG00000185008/ENSG00000019549/ENSG00000135111/ENSG00000092969/ENSG00000122691	18
GO:0035270	endocrine system development	37/2947	133/20870	2.71064e-05	0.00129601	0.00108189	ENSG00000105997/ENSG00000120093/ENSG00000150347/ENSG00000163132/ENSG00000007372/ENSG00000069011/ENSG00000164093/ENSG00000166949/ENSG00000134595/ENSG00000114251/ENSG00000184937/ENSG00000128918/ENSG00000140691/ENSG00000030110/ENSG00000125378/ENSG00000070193/ENSG00000179348/ENSG00000169840/ENSG00000106004/ENSG00000128652/ENSG00000160712/ENSG00000016082/ENSG00000162992/ENSG00000183072/ENSG00000148826…	37
GO:0010720	positive regulation of cell development	73/2947	325/20870	2.95769e-05	0.00140358	0.00117169	ENSG00000180613/ENSG00000078900/ENSG00000102606/ENSG00000176697/ENSG00000257923/ENSG00000106683/ENSG00000100503/ENSG00000007372/ENSG00000168779/ENSG00000176887/ENSG00000232810/ENSG00000182606/ENSG00000101126/ENSG00000071553/ENSG00000175866/ENSG00000198908/ENSG00000125378/ENSG00000169594/ENSG00000058404/ENSG00000110888/ENSG00000179242/ENSG00000179776/ENSG00000044090/ENSG00000006210/ENSG00000107562…	73
GO:0048839	inner ear development	50/2947	201/20870	3.39986e-05	0.00160146	0.00133688	ENSG00000105880/ENSG00000115507/ENSG00000117707/ENSG00000066468/ENSG00000158055/ENSG00000137203/ENSG00000114251/ENSG00000184254/ENSG00000125378/ENSG00000104327/ENSG00000136280/ENSG00000111276/ENSG00000060718/ENSG00000164932/ENSG00000006377/ENSG00000104413/ENSG00000119715/ENSG00000104313/ENSG00000112319/ENSG00000070193/ENSG00000078579/ENSG00000176165/ENSG00000164930/ENSG00000145864/ENSG00000179348…	50
GO:0048608	reproductive structure development	92/2947	435/20870	3.61825e-05	0.00168373	0.00140555	ENSG00000185551/ENSG00000091831/ENSG00000169083/ENSG00000150347/ENSG00000101144/ENSG00000110092/ENSG00000066468/ENSG00000013619/ENSG00000057657/ENSG00000145423/ENSG00000173320/ENSG00000137573/ENSG00000114251/ENSG00000184937/ENSG00000205336/ENSG00000179593/ENSG00000030110/ENSG00000125378/ENSG00000138696/ENSG00000139618/ENSG00000142871/ENSG00000111276/ENSG00000125931/ENSG00000183117/ENSG00000136943…	92
GO:0050770	regulation of axonogenesis	43/2947	165/20870	3.62746e-05	0.00168373	0.00140555	ENSG00000176697/ENSG00000174672/ENSG00000106683/ENSG00000072518/ENSG00000100503/ENSG00000182175/ENSG00000012171/ENSG00000168779/ENSG00000182606/ENSG00000114251/ENSG00000101126/ENSG00000179242/ENSG00000107562/ENSG00000173406/ENSG00000113758/ENSG00000136279/ENSG00000187323/ENSG00000171587/ENSG00000135333/ENSG00000129682/ENSG00000203879/ENSG00000167178/ENSG00000137261/ENSG00000123384/ENSG00000148948…	43
GO:1901890	positive regulation of cell junction assembly	34/2947	120/20870	3.74579e-05	0.00170989	0.00142739	ENSG00000089225/ENSG00000135298/ENSG00000176697/ENSG00000179915/ENSG00000166949/ENSG00000101126/ENSG00000135744/ENSG00000198908/ENSG00000163347/ENSG00000158258/ENSG00000139182/ENSG00000103319/ENSG00000142627/ENSG00000154928/ENSG00000185070/ENSG00000248905/ENSG00000158301/ENSG00000152208/ENSG00000177508/ENSG00000119185/ENSG00000128052/ENSG00000198739/ENSG00000169760/ENSG00000169992/ENSG00000198400…	34
GO:0001657	ureteric bud development	29/2947	96/20870	3.77384e-05	0.00170989	0.00142739	ENSG00000101144/ENSG00000066468/ENSG00000166949/ENSG00000184937/ENSG00000145536/ENSG00000135744/ENSG00000125378/ENSG00000104327/ENSG00000121691/ENSG00000125931/ENSG00000104313/ENSG00000113578/ENSG00000248905/ENSG00000054598/ENSG00000168621/ENSG00000106571/ENSG00000147257/ENSG00000260027/ENSG00000136997/ENSG00000143867/ENSG00000125618/ENSG00000131759/ENSG00000077092/ENSG00000185008/ENSG00000103449…	29
GO:0007626	locomotory behavior	47/2947	186/20870	3.78172e-05	0.00170989	0.00142739	ENSG00000118971/ENSG00000085788/ENSG00000162374/ENSG00000163064/ENSG00000143995/ENSG00000140836/ENSG00000183044/ENSG00000184254/ENSG00000138613/ENSG00000095139/ENSG00000113369/ENSG00000152092/ENSG00000165240/ENSG00000101200/ENSG00000104327/ENSG00000080644/ENSG00000159208/ENSG00000173786/ENSG00000107562/ENSG00000173406/ENSG00000132535/ENSG00000064218/ENSG00000197635/ENSG00000171587/ENSG00000153266…	47
GO:0003208	cardiac ventricle morphogenesis	24/2947	73/20870	3.79138e-05	0.00170989	0.00142739	ENSG00000117707/ENSG00000089225/ENSG00000066468/ENSG00000103241/ENSG00000145423/ENSG00000176887/ENSG00000060718/ENSG00000128917/ENSG00000054598/ENSG00000160973/ENSG00000136574/ENSG00000083307/ENSG00000164107/ENSG00000135547/ENSG00000163909/ENSG00000016082/ENSG00000081189/ENSG00000183072/ENSG00000157168/ENSG00000168214/ENSG00000124766/ENSG00000092969/ENSG00000118194/ENSG00000169946	24
GO:0003156	regulation of animal organ formation	13/2947	28/20870	4.02841e-05	0.00180399	0.00150595	ENSG00000169083/ENSG00000101144/ENSG00000137573/ENSG00000114251/ENSG00000184937/ENSG00000125378/ENSG00000113578/ENSG00000070193/ENSG00000166225/ENSG00000168621/ENSG00000169855/ENSG00000185008/ENSG00000164056	13
GO:0014031	mesenchymal cell development	27/2947	87/20870	4.0809e-05	0.00181471	0.0015149	ENSG00000101144/ENSG00000118257/ENSG00000164093/ENSG00000012171/ENSG00000176887/ENSG00000128918/ENSG00000197043/ENSG00000125378/ENSG00000110880/ENSG00000078401/ENSG00000151617/ENSG00000090776/ENSG00000178568/ENSG00000054598/ENSG00000168621/ENSG00000164107/ENSG00000135547/ENSG00000163909/ENSG00000016082/ENSG00000157168/ENSG00000157927/ENSG00000121039/ENSG00000170381/ENSG00000010319/ENSG00000128602…	27
GO:0030278	regulation of ossification	34/2947	121/20870	4.51123e-05	0.00197855	0.00165167	ENSG00000101144/ENSG00000166949/ENSG00000176887/ENSG00000137203/ENSG00000114251/ENSG00000183337/ENSG00000125378/ENSG00000138696/ENSG00000142871/ENSG00000131873/ENSG00000184371/ENSG00000162733/ENSG00000187608/ENSG00000133116/ENSG00000081189/ENSG00000150051/ENSG00000188554/ENSG00000143867/ENSG00000164920/ENSG00000101405/ENSG00000173868/ENSG00000171522/ENSG00000120899/ENSG00000105894/ENSG00000168214…	34
GO:0060900	embryonic camera-type eye formation	8/2947	12/20870	4.55163e-05	0.00197855	0.00165167	ENSG00000117707/ENSG00000176887/ENSG00000137203/ENSG00000114251/ENSG00000184254/ENSG00000166225/ENSG00000137868/ENSG00000122691	8
GO:0061029	eyelid development in camera-type eye	8/2947	12/20870	4.55163e-05	0.00197855	0.00165167	ENSG00000158055/ENSG00000176887/ENSG00000137203/ENSG00000116478/ENSG00000122641/ENSG00000164920/ENSG00000137868/ENSG00000122691	8
GO:0003184	pulmonary valve morphogenesis	10/2947	18/20870	4.57378e-05	0.00197855	0.00165167	ENSG00000125378/ENSG00000265107/ENSG00000135547/ENSG00000163909/ENSG00000131196/ENSG00000164867/ENSG00000169855/ENSG00000185008/ENSG00000137868/ENSG00000092969	10
GO:0072163	mesonephric epithelium development	29/2947	97/20870	4.66467e-05	0.00199078	0.00166188	ENSG00000101144/ENSG00000066468/ENSG00000166949/ENSG00000184937/ENSG00000145536/ENSG00000135744/ENSG00000125378/ENSG00000104327/ENSG00000121691/ENSG00000125931/ENSG00000104313/ENSG00000113578/ENSG00000248905/ENSG00000054598/ENSG00000168621/ENSG00000106571/ENSG00000147257/ENSG00000260027/ENSG00000136997/ENSG00000143867/ENSG00000125618/ENSG00000131759/ENSG00000077092/ENSG00000185008/ENSG00000103449…	29
GO:0072164	mesonephric tubule development	29/2947	97/20870	4.66467e-05	0.00199078	0.00166188	ENSG00000101144/ENSG00000066468/ENSG00000166949/ENSG00000184937/ENSG00000145536/ENSG00000135744/ENSG00000125378/ENSG00000104327/ENSG00000121691/ENSG00000125931/ENSG00000104313/ENSG00000113578/ENSG00000248905/ENSG00000054598/ENSG00000168621/ENSG00000106571/ENSG00000147257/ENSG00000260027/ENSG00000136997/ENSG00000143867/ENSG00000125618/ENSG00000131759/ENSG00000077092/ENSG00000185008/ENSG00000103449…	29
GO:0061458	reproductive system development	92/2947	438/20870	4.73978e-05	0.00200935	0.00167738	ENSG00000185551/ENSG00000091831/ENSG00000169083/ENSG00000150347/ENSG00000101144/ENSG00000110092/ENSG00000066468/ENSG00000013619/ENSG00000057657/ENSG00000145423/ENSG00000173320/ENSG00000137573/ENSG00000114251/ENSG00000184937/ENSG00000205336/ENSG00000179593/ENSG00000030110/ENSG00000125378/ENSG00000138696/ENSG00000139618/ENSG00000142871/ENSG00000111276/ENSG00000125931/ENSG00000183117/ENSG00000136943…	92
GO:2000052	positive regulation of non-canonical Wnt signaling pathway	9/2947	15/20870	4.91778e-05	0.00207101	0.00172885	ENSG00000114251/ENSG00000135299/ENSG00000141551/ENSG00000213923/ENSG00000153071/ENSG00000147257/ENSG00000171843/ENSG00000146374/ENSG00000111186	9
GO:0035137	hindlimb morphogenesis	15/2947	36/20870	5.00904e-05	0.00209556	0.00174935	ENSG00000052850/ENSG00000163132/ENSG00000069011/ENSG00000125378/ENSG00000248905/ENSG00000147257/ENSG00000128710/ENSG00000128709/ENSG00000143867/ENSG00000164920/ENSG00000077092/ENSG00000135111/ENSG00000121075/ENSG00000122691/ENSG00000109906	15
GO:0060412	ventricular septum morphogenesis	16/2947	40/20870	5.15187e-05	0.00213464	0.00178198	ENSG00000117707/ENSG00000066468/ENSG00000176887/ENSG00000114251/ENSG00000125378/ENSG00000135547/ENSG00000163909/ENSG00000183072/ENSG00000168214/ENSG00000169855/ENSG00000185008/ENSG00000124766/ENSG00000135111/ENSG00000092969/ENSG00000179588/ENSG00000169946	16
GO:0048813	dendrite morphogenesis	41/2947	157/20870	5.16961e-05	0.00213464	0.00178198	ENSG00000135298/ENSG00000257923/ENSG00000162374/ENSG00000159217/ENSG00000073921/ENSG00000182606/ENSG00000136754/ENSG00000138443/ENSG00000006740/ENSG00000175866/ENSG00000198908/ENSG00000132640/ENSG00000058404/ENSG00000110888/ENSG00000080644/ENSG00000044090/ENSG00000113758/ENSG00000136279/ENSG00000133083/ENSG00000132535/ENSG00000171587/ENSG00000047579/ENSG00000103319/ENSG00000154928/ENSG00000158301…	41
GO:0050803	regulation of synapse structure or activity	59/2947	253/20870	5.43943e-05	0.00220644	0.00184191	ENSG00000135298/ENSG00000176697/ENSG00000165379/ENSG00000118257/ENSG00000179915/ENSG00000232810/ENSG00000114251/ENSG00000138443/ENSG00000101126/ENSG00000128805/ENSG00000006740/ENSG00000175866/ENSG00000198908/ENSG00000165985/ENSG00000058404/ENSG00000110888/ENSG00000158258/ENSG00000139182/ENSG00000113758/ENSG00000136279/ENSG00000103319/ENSG00000114867/ENSG00000135333/ENSG00000154928/ENSG00000185070…	59
GO:0001656	metanephros development	28/2947	93/20870	5.44756e-05	0.00220644	0.00184191	ENSG00000167580/ENSG00000101144/ENSG00000184937/ENSG00000117362/ENSG00000125378/ENSG00000104327/ENSG00000174059/ENSG00000125931/ENSG00000104313/ENSG00000070193/ENSG00000248905/ENSG00000168621/ENSG00000106571/ENSG00000147257/ENSG00000177508/ENSG00000172037/ENSG00000136997/ENSG00000143867/ENSG00000164920/ENSG00000125618/ENSG00000134853/ENSG00000198914/ENSG00000121039/ENSG00000185008/ENSG00000103449…	28
GO:0014033	neural crest cell differentiation	28/2947	93/20870	5.44756e-05	0.00220644	0.00184191	ENSG00000101144/ENSG00000118257/ENSG00000164093/ENSG00000012171/ENSG00000176887/ENSG00000128918/ENSG00000197043/ENSG00000125378/ENSG00000110880/ENSG00000078401/ENSG00000151617/ENSG00000090776/ENSG00000178568/ENSG00000054598/ENSG00000168621/ENSG00000133937/ENSG00000164107/ENSG00000016082/ENSG00000081189/ENSG00000157168/ENSG00000157927/ENSG00000121039/ENSG00000170381/ENSG00000010319/ENSG00000128602…	28
GO:0001558	regulation of cell growth	97/2947	470/20870	6.09235e-05	0.00245198	0.00204688	ENSG00000176697/ENSG00000204580/ENSG00000106683/ENSG00000163132/ENSG00000182175/ENSG00000141564/ENSG00000012171/ENSG00000145423/ENSG00000166949/ENSG00000144560/ENSG00000114251/ENSG00000184937/ENSG00000006831/ENSG00000101126/ENSG00000135744/ENSG00000101200/ENSG00000143032/ENSG00000113916/ENSG00000100739/ENSG00000130303/ENSG00000110888/ENSG00000179242/ENSG00000074276/ENSG00000111276/ENSG00000139182…	97
GO:0048771	tissue remodeling	45/2947	179/20870	6.24157e-05	0.00249623	0.00208383	ENSG00000105997/ENSG00000160801/ENSG00000135744/ENSG00000071553/ENSG00000165240/ENSG00000030110/ENSG00000014216/ENSG00000164932/ENSG00000143387/ENSG00000162733/ENSG00000128917/ENSG00000163435/ENSG00000142627/ENSG00000181104/ENSG00000070193/ENSG00000196924/ENSG00000054598/ENSG00000173264/ENSG00000164107/ENSG00000135312/ENSG00000115461/ENSG00000174697/ENSG00000116678/ENSG00000135679/ENSG00000081189…	45
GO:0060443	mammary gland morphogenesis	18/2947	49/20870	6.79319e-05	0.00269987	0.00225382	ENSG00000091831/ENSG00000169083/ENSG00000204580/ENSG00000066468/ENSG00000114251/ENSG00000125378/ENSG00000014216/ENSG00000184371/ENSG00000183117/ENSG00000163435/ENSG00000142627/ENSG00000070193/ENSG00000106571/ENSG00000115461/ENSG00000065320/ENSG00000140464/ENSG00000171243/ENSG00000135111	18
GO:0001649	osteoblast differentiation	59/2947	255/20870	6.88991e-05	0.0027213	0.00227171	ENSG00000105880/ENSG00000101144/ENSG00000066468/ENSG00000068024/ENSG00000160801/ENSG00000119042/ENSG00000145423/ENSG00000168779/ENSG00000166949/ENSG00000176887/ENSG00000232810/ENSG00000087085/ENSG00000160710/ENSG00000110955/ENSG00000071553/ENSG00000125378/ENSG00000138696/ENSG00000121691/ENSG00000142871/ENSG00000090539/ENSG00000125931/ENSG00000108821/ENSG00000164932/ENSG00000019186/ENSG00000162733…	59
GO:0030501	positive regulation of bone mineralization	16/2947	41/20870	7.34728e-05	0.00288403	0.00240756	ENSG00000101144/ENSG00000166949/ENSG00000137203/ENSG00000125378/ENSG00000138696/ENSG00000142871/ENSG00000187608/ENSG00000133116/ENSG00000081189/ENSG00000143867/ENSG00000164920/ENSG00000105894/ENSG00000183023/ENSG00000119699/ENSG00000183160/ENSG00000169884	16
GO:0050807	regulation of synapse organization	57/2947	245/20870	7.71935e-05	0.00299858	0.00250318	ENSG00000135298/ENSG00000176697/ENSG00000165379/ENSG00000118257/ENSG00000179915/ENSG00000232810/ENSG00000114251/ENSG00000138443/ENSG00000101126/ENSG00000128805/ENSG00000006740/ENSG00000175866/ENSG00000198908/ENSG00000165985/ENSG00000058404/ENSG00000110888/ENSG00000158258/ENSG00000139182/ENSG00000113758/ENSG00000136279/ENSG00000103319/ENSG00000114867/ENSG00000135333/ENSG00000154928/ENSG00000185070…	57
GO:0010518	positive regulation of phospholipase activity	20/2947	58/20870	7.7334e-05	0.00299858	0.00250318	ENSG00000091831/ENSG00000047648/ENSG00000066468/ENSG00000102468/ENSG00000143322/ENSG00000120907/ENSG00000135744/ENSG00000120805/ENSG00000142871/ENSG00000151617/ENSG00000068078/ENSG00000174775/ENSG00000064547/ENSG00000171631/ENSG00000134853/ENSG00000167085/ENSG00000170890/ENSG00000067606/ENSG00000125910/ENSG00000074966	20
GO:0061035	regulation of cartilage development	24/2947	76/20870	7.86978e-05	0.0030147	0.00251663	ENSG00000168779/ENSG00000166949/ENSG00000134532/ENSG00000114251/ENSG00000151388/ENSG00000125378/ENSG00000138696/ENSG00000142871/ENSG00000143387/ENSG00000263761/ENSG00000106571/ENSG00000174697/ENSG00000150051/ENSG00000272573/ENSG00000109705/ENSG00000131759/ENSG00000077092/ENSG00000124813/ENSG00000103056/ENSG00000019549/ENSG00000110693/ENSG00000104447/ENSG00000109906/ENSG00000165804	24
GO:0061180	mammary gland epithelium development	24/2947	76/20870	7.86978e-05	0.0030147	0.00251663	ENSG00000091831/ENSG00000169083/ENSG00000110092/ENSG00000204580/ENSG00000066468/ENSG00000103241/ENSG00000163132/ENSG00000114251/ENSG00000139618/ENSG00000184371/ENSG00000183117/ENSG00000142627/ENSG00000178568/ENSG00000070193/ENSG00000106004/ENSG00000117595/ENSG00000065320/ENSG00000140464/ENSG00000169855/ENSG00000115310/ENSG00000128602/ENSG00000171243/ENSG00000135111/ENSG00000183779	24
GO:0050679	positive regulation of epithelial cell proliferation	51/2947	213/20870	8.29883e-05	0.00316002	0.00263795	ENSG00000232040/ENSG00000105880/ENSG00000117707/ENSG00000169083/ENSG00000110092/ENSG00000066468/ENSG00000118257/ENSG00000141564/ENSG00000176887/ENSG00000114251/ENSG00000171388/ENSG00000165240/ENSG00000125378/ENSG00000003402/ENSG00000163347/ENSG00000107562/ENSG00000051523/ENSG00000172817/ENSG00000006377/ENSG00000141736/ENSG00000104313/ENSG00000113578/ENSG00000070193/ENSG00000102678/ENSG00000179348…	51
GO:0060350	endochondral bone morphogenesis	19/2947	54/20870	8.49856e-05	0.0032168	0.00268535	ENSG00000105880/ENSG00000168779/ENSG00000197043/ENSG00000125378/ENSG00000138696/ENSG00000108821/ENSG00000068078/ENSG00000054598/ENSG00000081189/ENSG00000116604/ENSG00000173868/ENSG00000131759/ENSG00000077092/ENSG00000124813/ENSG00000103056/ENSG00000120156/ENSG00000183160/ENSG00000111199/ENSG00000182704	19
GO:1901798	positive regulation of signal transduction by p53 class mediator	12/2947	26/20870	8.59469e-05	0.00321698	0.0026855	ENSG00000186834/ENSG00000163132/ENSG00000149311/ENSG00000116254/ENSG00000108654/ENSG00000132507/ENSG00000153246/ENSG00000125691/ENSG00000145592/ENSG00000198369/ENSG00000170315/ENSG00000161642	12
GO:0030111	regulation of Wnt signaling pathway	74/2947	341/20870	8.6002e-05	0.00321698	0.0026855	ENSG00000167693/ENSG00000105880/ENSG00000066468/ENSG00000145423/ENSG00000166949/ENSG00000137573/ENSG00000101849/ENSG00000144560/ENSG00000114251/ENSG00000198796/ENSG00000184675/ENSG00000165566/ENSG00000135299/ENSG00000134982/ENSG00000182220/ENSG00000110888/ENSG00000015133/ENSG00000100888/ENSG00000125931/ENSG00000108821/ENSG00000113712/ENSG00000141551/ENSG00000213923/ENSG00000169118/ENSG00000164932…	74
GO:0033002	muscle cell proliferation	62/2947	274/20870	9.07612e-05	0.00337515	0.00281754	ENSG00000089225/ENSG00000078900/ENSG00000066468/ENSG00000114861/ENSG00000068024/ENSG00000143995/ENSG00000232810/ENSG00000144560/ENSG00000125257/ENSG00000135744/ENSG00000108839/ENSG00000154188/ENSG00000171388/ENSG00000125378/ENSG00000134057/ENSG00000111276/ENSG00000003402/ENSG00000130176/ENSG00000006210/ENSG00000051523/ENSG00000198563/ENSG00000078401/ENSG00000049540/ENSG00000154928/ENSG00000178568…	62
GO:0048557	embryonic digestive tract morphogenesis	9/2947	16/20870	9.82872e-05	0.00361276	0.00301589	ENSG00000066468/ENSG00000103241/ENSG00000168779/ENSG00000176887/ENSG00000070193/ENSG00000106571/ENSG00000136630/ENSG00000134853/ENSG00000118526	9
GO:0060572	morphogenesis of an epithelial bud	9/2947	16/20870	9.82872e-05	0.00361276	0.00301589	ENSG00000169083/ENSG00000101144/ENSG00000066468/ENSG00000137573/ENSG00000114251/ENSG00000125378/ENSG00000070193/ENSG00000121039/ENSG00000171243	9
GO:0030856	regulation of epithelial cell differentiation	43/2947	172/20870	0.000102929	0.00371302	0.00309959	ENSG00000204301/ENSG00000110092/ENSG00000007372/ENSG00000232810/ENSG00000196581/ENSG00000179593/ENSG00000178878/ENSG00000125378/ENSG00000272398/ENSG00000179776/ENSG00000111276/ENSG00000125931/ENSG00000104413/ENSG00000175832/ENSG00000054598/ENSG00000263761/ENSG00000168621/ENSG00000083307/ENSG00000135547/ENSG00000162891/ENSG00000118263/ENSG00000099284/ENSG00000284038/ENSG00000207713/ENSG00000134323…	43
GO:0009880	embryonic pattern specification	22/2947	68/20870	0.000103147	0.00371302	0.00309959	ENSG00000101144/ENSG00000066468/ENSG00000143995/ENSG00000118257/ENSG00000119042/ENSG00000159263/ENSG00000166949/ENSG00000114251/ENSG00000184937/ENSG00000168014/ENSG00000125931/ENSG00000090776/ENSG00000178568/ENSG00000070193/ENSG00000166225/ENSG00000005102/ENSG00000106511/ENSG00000179598/ENSG00000135111/ENSG00000164458/ENSG00000125084/ENSG00000109906	22
GO:0051965	positive regulation of synapse assembly	22/2947	68/20870	0.000103147	0.00371302	0.00309959	ENSG00000135298/ENSG00000176697/ENSG00000179915/ENSG00000101126/ENSG00000198908/ENSG00000158258/ENSG00000139182/ENSG00000103319/ENSG00000154928/ENSG00000185070/ENSG00000158301/ENSG00000152208/ENSG00000198739/ENSG00000169760/ENSG00000169992/ENSG00000198400/ENSG00000101405/ENSG00000178235/ENSG00000185985/ENSG00000121871/ENSG00000179542/ENSG00000102359	22
GO:0060560	developmental growth involved in morphogenesis	58/2947	253/20870	0.00010335	0.00371302	0.00309959	ENSG00000091831/ENSG00000124785/ENSG00000176697/ENSG00000204580/ENSG00000066468/ENSG00000106683/ENSG00000100503/ENSG00000118257/ENSG00000182175/ENSG00000012171/ENSG00000145423/ENSG00000114251/ENSG00000101126/ENSG00000170017/ENSG00000143032/ENSG00000125378/ENSG00000179242/ENSG00000184371/ENSG00000107562/ENSG00000113758/ENSG00000136279/ENSG00000187323/ENSG00000133083/ENSG00000079805/ENSG00000092964…	58
GO:0060996	dendritic spine development	30/2947	106/20870	0.000106836	0.00379923	0.00317155	ENSG00000146555/ENSG00000144711/ENSG00000138443/ENSG00000068366/ENSG00000006740/ENSG00000175866/ENSG00000198908/ENSG00000058404/ENSG00000110888/ENSG00000107864/ENSG00000113758/ENSG00000136279/ENSG00000132535/ENSG00000103319/ENSG00000154928/ENSG00000102081/ENSG00000158301/ENSG00000205726/ENSG00000139233/ENSG00000088899/ENSG00000081189/ENSG00000071051/ENSG00000169760/ENSG00000077264/ENSG00000145632…	30
GO:0014032	neural crest cell development	25/2947	82/20870	0.000106945	0.00379923	0.00317155	ENSG00000101144/ENSG00000118257/ENSG00000164093/ENSG00000012171/ENSG00000176887/ENSG00000128918/ENSG00000197043/ENSG00000125378/ENSG00000110880/ENSG00000078401/ENSG00000151617/ENSG00000090776/ENSG00000178568/ENSG00000054598/ENSG00000168621/ENSG00000164107/ENSG00000016082/ENSG00000157168/ENSG00000157927/ENSG00000121039/ENSG00000170381/ENSG00000010319/ENSG00000128602/ENSG00000019549/ENSG00000122691	25
GO:0021761	limbic system development	32/2947	116/20870	0.000109324	0.00386217	0.0032241	ENSG00000117707/ENSG00000066468/ENSG00000118257/ENSG00000134595/ENSG00000184254/ENSG00000147571/ENSG00000173406/ENSG00000144355/ENSG00000170370/ENSG00000149557/ENSG00000153266/ENSG00000129682/ENSG00000106571/ENSG00000169840/ENSG00000116478/ENSG00000157219/ENSG00000162761/ENSG00000277586/ENSG00000162992/ENSG00000164600/ENSG00000169297/ENSG00000112333/ENSG00000184486/ENSG00000131759/ENSG00000134438…	32
GO:0021537	telencephalon development	62/2947	276/20870	0.000112952	0.0039683	0.00331269	ENSG00000180613/ENSG00000105880/ENSG00000117707/ENSG00000159217/ENSG00000100503/ENSG00000007372/ENSG00000114251/ENSG00000205336/ENSG00000184254/ENSG00000240583/ENSG00000004848/ENSG00000166780/ENSG00000125378/ENSG00000132640/ENSG00000149187/ENSG00000107562/ENSG00000173406/ENSG00000144355/ENSG00000135638/ENSG00000170370/ENSG00000178568/ENSG00000149557/ENSG00000128610/ENSG00000153266/ENSG00000129682…	62
GO:0035051	cardiocyte differentiation	43/2947	173/20870	0.000118537	0.00414165	0.0034574	ENSG00000117707/ENSG00000089225/ENSG00000101144/ENSG00000164093/ENSG00000168779/ENSG00000184937/ENSG00000120907/ENSG00000135744/ENSG00000170776/ENSG00000198796/ENSG00000100628/ENSG00000125378/ENSG00000134057/ENSG00000198563/ENSG00000078401/ENSG00000166225/ENSG00000160211/ENSG00000136574/ENSG00000164850/ENSG00000164107/ENSG00000135547/ENSG00000017427/ENSG00000177508/ENSG00000016082/ENSG00000160789…	43
GO:0060828	regulation of canonical Wnt signaling pathway	59/2947	260/20870	0.000121941	0.00423728	0.00353723	ENSG00000105880/ENSG00000066468/ENSG00000145423/ENSG00000166949/ENSG00000101849/ENSG00000114251/ENSG00000184675/ENSG00000165566/ENSG00000135299/ENSG00000134982/ENSG00000182220/ENSG00000110888/ENSG00000015133/ENSG00000100888/ENSG00000108821/ENSG00000113712/ENSG00000141551/ENSG00000213923/ENSG00000169118/ENSG00000164932/ENSG00000153071/ENSG00000104901/ENSG00000158813/ENSG00000189319/ENSG00000070193…	59
GO:0014855	striated muscle cell proliferation	24/2947	78/20870	0.000124286	0.00429529	0.00358566	ENSG00000089225/ENSG00000078900/ENSG00000066468/ENSG00000143995/ENSG00000144560/ENSG00000154188/ENSG00000134057/ENSG00000003402/ENSG00000154928/ENSG00000178568/ENSG00000078579/ENSG00000054598/ENSG00000135547/ENSG00000082482/ENSG00000081189/ENSG00000207752/ENSG00000103034/ENSG00000112033/ENSG00000138207/ENSG00000168214/ENSG00000159216/ENSG00000168610/ENSG00000092969/ENSG00000169946	24
GO:0099173	postsynapse organization	45/2947	184/20870	0.000125247	0.0043051	0.00359385	ENSG00000118257/ENSG00000179915/ENSG00000114251/ENSG00000138443/ENSG00000128805/ENSG00000006740/ENSG00000175866/ENSG00000198908/ENSG00000058404/ENSG00000110888/ENSG00000149970/ENSG00000113758/ENSG00000136279/ENSG00000132535/ENSG00000103319/ENSG00000135333/ENSG00000154928/ENSG00000168621/ENSG00000121853/ENSG00000109738/ENSG00000158301/ENSG00000152208/ENSG00000152413/ENSG00000109971/ENSG00000140443…	45
GO:0031110	regulation of microtubule polymerization or depolymerization	29/2947	102/20870	0.000126455	0.00432328	0.00360903	ENSG00000141556/ENSG00000102606/ENSG00000163635/ENSG00000163539/ENSG00000100503/ENSG00000134982/ENSG00000166780/ENSG00000130559/ENSG00000118200/ENSG00000179776/ENSG00000111276/ENSG00000130779/ENSG00000125746/ENSG00000182511/ENSG00000129682/ENSG00000204389/ENSG00000204388/ENSG00000169057/ENSG00000165175/ENSG00000137497/ENSG00000197822/ENSG00000182628/ENSG00000139737/ENSG00000101222/ENSG00000104435…	29
GO:0055017	cardiac muscle tissue growth	30/2947	107/20870	0.000128655	0.00437497	0.00365218	ENSG00000089225/ENSG00000078900/ENSG00000066468/ENSG00000143995/ENSG00000144560/ENSG00000120907/ENSG00000135744/ENSG00000170776/ENSG00000134057/ENSG00000198563/ENSG00000078401/ENSG00000178568/ENSG00000078579/ENSG00000054598/ENSG00000160211/ENSG00000136574/ENSG00000135547/ENSG00000017427/ENSG00000082482/ENSG00000081189/ENSG00000207752/ENSG00000103034/ENSG00000129484/ENSG00000138207/ENSG00000168214…	30
GO:0030850	prostate gland development	17/2947	47/20870	0.000134224	0.00449059	0.00374869	ENSG00000091831/ENSG00000169083/ENSG00000101144/ENSG00000066468/ENSG00000137573/ENSG00000114251/ENSG00000179593/ENSG00000125378/ENSG00000111276/ENSG00000172817/ENSG00000070193/ENSG00000166225/ENSG00000106571/ENSG00000128714/ENSG00000131759/ENSG00000132386/ENSG00000173473	17
GO:0060999	positive regulation of dendritic spine development	17/2947	47/20870	0.000134224	0.00449059	0.00374869	ENSG00000175866/ENSG00000198908/ENSG00000058404/ENSG00000110888/ENSG00000107864/ENSG00000113758/ENSG00000136279/ENSG00000103319/ENSG00000102081/ENSG00000158301/ENSG00000205726/ENSG00000139233/ENSG00000169760/ENSG00000077264/ENSG00000158528/ENSG00000161681/ENSG00000101040	17
GO:0001958	endochondral ossification	12/2947	27/20870	0.00013488	0.00449059	0.00374869	ENSG00000105880/ENSG00000125378/ENSG00000108821/ENSG00000068078/ENSG00000054598/ENSG00000081189/ENSG00000116604/ENSG00000173868/ENSG00000124813/ENSG00000103056/ENSG00000120156/ENSG00000183160	12
GO:0036075	replacement ossification	12/2947	27/20870	0.00013488	0.00449059	0.00374869	ENSG00000105880/ENSG00000125378/ENSG00000108821/ENSG00000068078/ENSG00000054598/ENSG00000081189/ENSG00000116604/ENSG00000173868/ENSG00000124813/ENSG00000103056/ENSG00000120156/ENSG00000183160	12
GO:0036293	response to decreased oxygen levels	74/2947	346/20870	0.000139183	0.00459598	0.00383667	ENSG00000129993/ENSG00000057593/ENSG00000101144/ENSG00000069667/ENSG00000166949/ENSG00000183044/ENSG00000177674/ENSG00000101444/ENSG00000156709/ENSG00000162433/ENSG00000108602/ENSG00000091879/ENSG00000178878/ENSG00000240583/ENSG00000143153/ENSG00000165240/ENSG00000109956/ENSG00000113734/ENSG00000162909/ENSG00000121691/ENSG00000134057/ENSG00000272398/ENSG00000174059/ENSG00000111276/ENSG00000003402…	74
GO:0001701	in utero embryonic development	83/2947	398/20870	0.000139491	0.00459598	0.00383667	ENSG00000167693/ENSG00000185551/ENSG00000169083/ENSG00000068650/ENSG00000101144/ENSG00000129562/ENSG00000066468/ENSG00000103241/ENSG00000163132/ENSG00000057657/ENSG00000160801/ENSG00000166949/ENSG00000162104/ENSG00000154188/ENSG00000140691/ENSG00000165240/ENSG00000183337/ENSG00000168283/ENSG00000139618/ENSG00000168014/ENSG00000162909/ENSG00000136280/ENSG00000142871/ENSG00000134057/ENSG00000100814…	83
GO:0010639	negative regulation of organelle organization	80/2947	381/20870	0.000144628	0.00473967	0.00395662	ENSG00000141556/ENSG00000047648/ENSG00000102606/ENSG00000163635/ENSG00000101144/ENSG00000042493/ENSG00000163539/ENSG00000110200/ENSG00000134982/ENSG00000186635/ENSG00000149311/ENSG00000101200/ENSG00000166780/ENSG00000125378/ENSG00000166323/ENSG00000130559/ENSG00000118200/ENSG00000134057/ENSG00000179776/ENSG00000186166/ENSG00000182504/ENSG00000172725/ENSG00000172795/ENSG00000164741/ENSG00000137090…	80
GO:0042475	odontogenesis of dentin-containing tooth	27/2947	93/20870	0.000145343	0.00473967	0.00395662	ENSG00000167522/ENSG00000101144/ENSG00000163132/ENSG00000125378/ENSG00000184371/ENSG00000119535/ENSG00000144355/ENSG00000152592/ENSG00000064218/ENSG00000158813/ENSG00000108950/ENSG00000177706/ENSG00000070193/ENSG00000054598/ENSG00000106571/ENSG00000164107/ENSG00000116478/ENSG00000134853/ENSG00000124813/ENSG00000106366/ENSG00000128602/ENSG00000103056/ENSG00000171243/ENSG00000110719/ENSG00000164761…	27
GO:0060216	definitive hemopoiesis	10/2947	20/20870	0.000147312	0.00477936	0.00398976	ENSG00000120093/ENSG00000143995/ENSG00000160710/ENSG00000179348/ENSG00000078399/ENSG00000104903/ENSG00000197614/ENSG00000172845/ENSG00000120156/ENSG00000179588	10
GO:0003229	ventricular cardiac muscle tissue development	19/2947	56/20870	0.000148307	0.00478531	0.00399472	ENSG00000117707/ENSG00000089225/ENSG00000163638/ENSG00000066468/ENSG00000060718/ENSG00000128917/ENSG00000054598/ENSG00000160973/ENSG00000135547/ENSG00000171476/ENSG00000177508/ENSG00000016082/ENSG00000183072/ENSG00000157168/ENSG00000168214/ENSG00000135111/ENSG00000092969/ENSG00000118194/ENSG00000169946	19
GO:0003161	cardiac conduction system development	15/2947	39/20870	0.000149	0.00478531	0.00399472	ENSG00000089225/ENSG00000163132/ENSG00000168779/ENSG00000125378/ENSG00000136574/ENSG00000265107/ENSG00000121742/ENSG00000135547/ENSG00000171476/ENSG00000177508/ENSG00000016082/ENSG00000178860/ENSG00000183072/ENSG00000157168/ENSG00000135111	15
GO:0003018	vascular process in circulatory system	62/2947	279/20870	0.000155613	0.00497258	0.00415105	ENSG00000107796/ENSG00000196639/ENSG00000102468/ENSG00000092068/ENSG00000023839/ENSG00000125257/ENSG00000120907/ENSG00000135744/ENSG00000131016/ENSG00000154188/ENSG00000171388/ENSG00000101200/ENSG00000172232/ENSG00000168398/ENSG00000205502/ENSG00000179776/ENSG00000133019/ENSG00000153904/ENSG00000078401/ENSG00000151617/ENSG00000181104/ENSG00000054598/ENSG00000265107/ENSG00000164850/ENSG00000177464…	62
GO:0051148	negative regulation of muscle cell differentiation	22/2947	70/20870	0.00016638	0.00527054	0.00439979	ENSG00000061455/ENSG00000176697/ENSG00000068024/ENSG00000163132/ENSG00000102678/ENSG00000166225/ENSG00000160211/ENSG00000135547/ENSG00000167244/ENSG00000169057/ENSG00000118579/ENSG00000207752/ENSG00000199075/ENSG00000131196/ENSG00000101096/ENSG00000072736/ENSG00000183072/ENSG00000160539/ENSG00000116741/ENSG00000117152/ENSG00000110693/ENSG00000183160	22
GO:0070482	response to oxygen levels	78/2947	371/20870	0.000166595	0.00527054	0.00439979	ENSG00000129993/ENSG00000057593/ENSG00000101144/ENSG00000069667/ENSG00000166949/ENSG00000183044/ENSG00000177674/ENSG00000101444/ENSG00000156709/ENSG00000162433/ENSG00000108602/ENSG00000091879/ENSG00000178878/ENSG00000240583/ENSG00000143153/ENSG00000071553/ENSG00000165240/ENSG00000109956/ENSG00000113734/ENSG00000162909/ENSG00000121691/ENSG00000134057/ENSG00000272398/ENSG00000174059/ENSG00000111276…	78
GO:0008217	regulation of blood pressure	46/2947	192/20870	0.000177398	0.00558454	0.00466191	ENSG00000185551/ENSG00000113448/ENSG00000107796/ENSG00000169083/ENSG00000166949/ENSG00000183044/ENSG00000005187/ENSG00000145536/ENSG00000197894/ENSG00000120907/ENSG00000135744/ENSG00000177674/ENSG00000171388/ENSG00000182220/ENSG00000101200/ENSG00000100739/ENSG00000174059/ENSG00000164692/ENSG00000145244/ENSG00000147571/ENSG00000051523/ENSG00000153904/ENSG00000078401/ENSG00000151617/ENSG00000181104…	46
GO:0010812	negative regulation of cell-substrate adhesion	23/2947	75/20870	0.000180287	0.00560913	0.00468243	ENSG00000141556/ENSG00000047648/ENSG00000163539/ENSG00000130402/ENSG00000196581/ENSG00000091879/ENSG00000113916/ENSG00000147044/ENSG00000108821/ENSG00000110880/ENSG00000006210/ENSG00000164741/ENSG00000112679/ENSG00000119185/ENSG00000100097/ENSG00000123384/ENSG00000207691/ENSG00000144824/ENSG00000145675/ENSG00000179051/ENSG00000170381/ENSG00000106366/ENSG00000125084	23
GO:0048701	embryonic cranial skeleton morphogenesis	17/2947	48/20870	0.000180706	0.00560913	0.00468243	ENSG00000066468/ENSG00000166949/ENSG00000092607/ENSG00000137203/ENSG00000125378/ENSG00000106571/ENSG00000083307/ENSG00000105991/ENSG00000105996/ENSG00000187535/ENSG00000184634/ENSG00000070614/ENSG00000134853/ENSG00000121039/ENSG00000124813/ENSG00000119699/ENSG00000122691	17
GO:0046785	microtubule polymerization	28/2947	99/20870	0.000180826	0.00560913	0.00468243	ENSG00000141556/ENSG00000102606/ENSG00000163539/ENSG00000100503/ENSG00000130559/ENSG00000118200/ENSG00000179776/ENSG00000111276/ENSG00000151849/ENSG00000130779/ENSG00000141551/ENSG00000125746/ENSG00000182511/ENSG00000129682/ENSG00000204389/ENSG00000204388/ENSG00000129680/ENSG00000169057/ENSG00000072864/ENSG00000137497/ENSG00000197822/ENSG00000139737/ENSG00000104435/ENSG00000198718/ENSG00000088325…	28
GO:0060571	morphogenesis of an epithelial fold	11/2947	24/20870	0.000183726	0.00566573	0.00472969	ENSG00000169083/ENSG00000101144/ENSG00000066468/ENSG00000137573/ENSG00000114251/ENSG00000125378/ENSG00000070193/ENSG00000143869/ENSG00000128714/ENSG00000121039/ENSG00000171243	11
GO:0045926	negative regulation of growth	61/2947	275/20870	0.000184432	0.00566573	0.00472969	ENSG00000089225/ENSG00000078900/ENSG00000143995/ENSG00000163132/ENSG00000182175/ENSG00000012171/ENSG00000145423/ENSG00000166949/ENSG00000144560/ENSG00000114251/ENSG00000184937/ENSG00000006831/ENSG00000135744/ENSG00000179593/ENSG00000113916/ENSG00000100739/ENSG00000125378/ENSG00000130303/ENSG00000110888/ENSG00000074276/ENSG00000111276/ENSG00000057019/ENSG00000187323/ENSG00000135333/ENSG00000129682…	61
GO:0031109	microtubule polymerization or depolymerization	36/2947	140/20870	0.000200374	0.00612586	0.0051138	ENSG00000141556/ENSG00000102606/ENSG00000163635/ENSG00000163539/ENSG00000100503/ENSG00000134982/ENSG00000166780/ENSG00000130559/ENSG00000118200/ENSG00000154429/ENSG00000179776/ENSG00000111276/ENSG00000151849/ENSG00000130779/ENSG00000141551/ENSG00000125746/ENSG00000182511/ENSG00000129682/ENSG00000204389/ENSG00000204388/ENSG00000129680/ENSG00000169057/ENSG00000165175/ENSG00000072864/ENSG00000137497…	36
GO:0030324	lung development	46/2947	193/20870	0.000201541	0.00613205	0.00511897	ENSG00000117707/ENSG00000089225/ENSG00000066468/ENSG00000103241/ENSG00000101680/ENSG00000115318/ENSG00000159263/ENSG00000176887/ENSG00000232810/ENSG00000114251/ENSG00000128918/ENSG00000171456/ENSG00000165240/ENSG00000125378/ENSG00000187840/ENSG00000126767/ENSG00000113578/ENSG00000070193/ENSG00000102678/ENSG00000106571/ENSG00000147257/ENSG00000083307/ENSG00000189403/ENSG00000171476/ENSG00000106004…	46
GO:0010464	regulation of mesenchymal cell proliferation	12/2947	28/20870	0.000205827	0.00623264	0.00520294	ENSG00000066468/ENSG00000103241/ENSG00000168779/ENSG00000114251/ENSG00000125378/ENSG00000090539/ENSG00000160789/ENSG00000136997/ENSG00000134323/ENSG00000147862/ENSG00000105894/ENSG00000128602	12
GO:0051402	neuron apoptotic process	59/2947	265/20870	0.000209935	0.00632692	0.00528164	ENSG00000176697/ENSG00000122966/ENSG00000197406/ENSG00000163064/ENSG00000068024/ENSG00000137203/ENSG00000232810/ENSG00000090861/ENSG00000101126/ENSG00000156709/ENSG00000154188/ENSG00000111676/ENSG00000198908/ENSG00000132906/ENSG00000125931/ENSG00000242689/ENSG00000006210/ENSG00000144355/ENSG00000129521/ENSG00000135333/ENSG00000181104/ENSG00000135472/ENSG00000078579/ENSG00000160211/ENSG00000145864…	59
GO:0001837	epithelial to mesenchymal transition	42/2947	172/20870	0.000214139	0.00639734	0.00534042	ENSG00000204301/ENSG00000089225/ENSG00000101144/ENSG00000163539/ENSG00000066468/ENSG00000144730/ENSG00000115318/ENSG00000163132/ENSG00000145423/ENSG00000166949/ENSG00000114251/ENSG00000125378/ENSG00000108821/ENSG00000044090/ENSG00000153071/ENSG00000108654/ENSG00000044524/ENSG00000196924/ENSG00000054598/ENSG00000133937/ENSG00000170961/ENSG00000135547/ENSG00000163909/ENSG00000019991/ENSG00000149948…	42
GO:0003203	endocardial cushion morphogenesis	14/2947	36/20870	0.000214905	0.00639734	0.00534042	ENSG00000101144/ENSG00000163132/ENSG00000135547/ENSG00000163909/ENSG00000016082/ENSG00000135679/ENSG00000164867/ENSG00000168214/ENSG00000169855/ENSG00000185008/ENSG00000019549/ENSG00000135111/ENSG00000092969/ENSG00000122691	14
GO:0061036	positive regulation of cartilage development	13/2947	32/20870	0.00021529	0.00639734	0.00534042	ENSG00000166949/ENSG00000134532/ENSG00000114251/ENSG00000125378/ENSG00000138696/ENSG00000142871/ENSG00000263761/ENSG00000106571/ENSG00000272573/ENSG00000124813/ENSG00000110693/ENSG00000109906/ENSG00000165804	13
GO:1904181	positive regulation of membrane depolarization	7/2947	11/20870	0.000217304	0.00641041	0.00535134	ENSG00000151150/ENSG00000108839/ENSG00000187094/ENSG00000011465/ENSG00000128052/ENSG00000130529/ENSG00000100300	7
GO:0099175	regulation of postsynapse organization	28/2947	100/20870	0.000217746	0.00641041	0.00535134	ENSG00000118257/ENSG00000114251/ENSG00000138443/ENSG00000128805/ENSG00000006740/ENSG00000175866/ENSG00000198908/ENSG00000058404/ENSG00000110888/ENSG00000113758/ENSG00000136279/ENSG00000103319/ENSG00000135333/ENSG00000121853/ENSG00000158301/ENSG00000152208/ENSG00000152413/ENSG00000109971/ENSG00000156564/ENSG00000173621/ENSG00000088899/ENSG00000169760/ENSG00000140538/ENSG00000077264/ENSG00000139220…	28
GO:0051146	striated muscle cell differentiation	67/2947	311/20870	0.000225534	0.0066091	0.0055172	ENSG00000117707/ENSG00000089225/ENSG00000135298/ENSG00000068650/ENSG00000176697/ENSG00000068024/ENSG00000163132/ENSG00000168779/ENSG00000184937/ENSG00000120907/ENSG00000135744/ENSG00000170776/ENSG00000198796/ENSG00000100628/ENSG00000116128/ENSG00000125378/ENSG00000162909/ENSG00000134057/ENSG00000003402/ENSG00000159176/ENSG00000198563/ENSG00000187957/ENSG00000078401/ENSG00000166225/ENSG00000160211…	67
GO:0009410	response to xenobiotic stimulus	98/2947	493/20870	0.00023781	0.00693684	0.0057908	ENSG00000138061/ENSG00000078900/ENSG00000129562/ENSG00000136750/ENSG00000068024/ENSG00000102468/ENSG00000069667/ENSG00000181031/ENSG00000141564/ENSG00000145423/ENSG00000183044/ENSG00000023839/ENSG00000125257/ENSG00000076555/ENSG00000151726/ENSG00000164742/ENSG00000006831/ENSG00000148671/ENSG00000120907/ENSG00000162433/ENSG00000108602/ENSG00000030110/ENSG00000137936/ENSG00000121691/ENSG00000159231…	98
GO:0060998	regulation of dendritic spine development	21/2947	67/20870	0.000242147	0.00703111	0.00586949	ENSG00000146555/ENSG00000175866/ENSG00000198908/ENSG00000058404/ENSG00000110888/ENSG00000107864/ENSG00000113758/ENSG00000136279/ENSG00000103319/ENSG00000102081/ENSG00000158301/ENSG00000205726/ENSG00000139233/ENSG00000081189/ENSG00000169760/ENSG00000077264/ENSG00000145632/ENSG00000139220/ENSG00000158528/ENSG00000161681/ENSG00000101040	21
GO:0042391	regulation of membrane potential	93/2947	464/20870	0.000252147	0.00725741	0.0060584	ENSG00000069424/ENSG00000089225/ENSG00000198373/ENSG00000145362/ENSG00000151150/ENSG00000179915/ENSG00000133874/ENSG00000183044/ENSG00000120907/ENSG00000108839/ENSG00000143153/ENSG00000069849/ENSG00000175866/ENSG00000030110/ENSG00000197580/ENSG00000165995/ENSG00000187094/ENSG00000168539/ENSG00000080644/ENSG00000169684/ENSG00000011465/ENSG00000132535/ENSG00000134755/ENSG00000078401/ENSG00000114279…	93
GO:0045667	regulation of osteoblast differentiation	38/2947	152/20870	0.000252223	0.00725741	0.0060584	ENSG00000101144/ENSG00000066468/ENSG00000068024/ENSG00000145423/ENSG00000166949/ENSG00000176887/ENSG00000232810/ENSG00000071553/ENSG00000125378/ENSG00000138696/ENSG00000142871/ENSG00000090539/ENSG00000125931/ENSG00000164932/ENSG00000162733/ENSG00000108654/ENSG00000162643/ENSG00000186188/ENSG00000106571/ENSG00000164107/ENSG00000061273/ENSG00000019991/ENSG00000105996/ENSG00000017427/ENSG00000115461…	38
GO:0001666	response to hypoxia	70/2947	330/20870	0.00026715	0.00765227	0.00638803	ENSG00000129993/ENSG00000057593/ENSG00000101144/ENSG00000069667/ENSG00000166949/ENSG00000183044/ENSG00000177674/ENSG00000101444/ENSG00000162433/ENSG00000108602/ENSG00000091879/ENSG00000178878/ENSG00000240583/ENSG00000143153/ENSG00000165240/ENSG00000109956/ENSG00000162909/ENSG00000121691/ENSG00000134057/ENSG00000272398/ENSG00000174059/ENSG00000111276/ENSG00000003402/ENSG00000131055/ENSG00000107562…	70
GO:0021675	nerve development	23/2947	77/20870	0.000277696	0.0078876	0.00658448	ENSG00000105997/ENSG00000120093/ENSG00000176697/ENSG00000118257/ENSG00000137573/ENSG00000137203/ENSG00000179774/ENSG00000136943/ENSG00000100697/ENSG00000154928/ENSG00000145864/ENSG00000106571/ENSG00000105991/ENSG00000173917/ENSG00000016082/ENSG00000166833/ENSG00000225950/ENSG00000198400/ENSG00000103449/ENSG00000079215/ENSG00000196562/ENSG00000110719/ENSG00000171202	23
GO:0042220	response to cocaine	20/2947	63/20870	0.000279086	0.0078876	0.00658448	ENSG00000146555/ENSG00000162374/ENSG00000163064/ENSG00000102468/ENSG00000183044/ENSG00000147571/ENSG00000145708/ENSG00000079805/ENSG00000150540/ENSG00000152413/ENSG00000044574/ENSG00000135312/ENSG00000166736/ENSG00000135679/ENSG00000101405/ENSG00000120899/ENSG00000117152/ENSG00000110436/ENSG00000079215/ENSG00000157103	20
GO:0046622	positive regulation of organ growth	20/2947	63/20870	0.000279086	0.0078876	0.00658448	ENSG00000117707/ENSG00000089225/ENSG00000066468/ENSG00000184937/ENSG00000076555/ENSG00000004848/ENSG00000134057/ENSG00000198563/ENSG00000078401/ENSG00000178568/ENSG00000135547/ENSG00000136630/ENSG00000017427/ENSG00000167244/ENSG00000081189/ENSG00000207752/ENSG00000129484/ENSG00000168214/ENSG00000128602/ENSG00000169946	20
GO:0060740	prostate gland epithelium morphogenesis	11/2947	25/20870	0.000286369	0.00802212	0.00669678	ENSG00000091831/ENSG00000169083/ENSG00000101144/ENSG00000066468/ENSG00000137573/ENSG00000114251/ENSG00000125378/ENSG00000172817/ENSG00000070193/ENSG00000166225/ENSG00000128714	11
GO:2000310	regulation of NMDA receptor activity	11/2947	25/20870	0.000286369	0.00802212	0.00669678	ENSG00000014216/ENSG00000147571/ENSG00000145708/ENSG00000196730/ENSG00000132535/ENSG00000159128/ENSG00000081189/ENSG00000169760/ENSG00000120899/ENSG00000058335/ENSG00000113319	11
GO:0050772	positive regulation of axonogenesis	25/2947	87/20870	0.000299979	0.00836653	0.00698429	ENSG00000176697/ENSG00000106683/ENSG00000100503/ENSG00000168779/ENSG00000182606/ENSG00000101126/ENSG00000179242/ENSG00000107562/ENSG00000113758/ENSG00000136279/ENSG00000171587/ENSG00000203879/ENSG00000167178/ENSG00000123384/ENSG00000073803/ENSG00000277586/ENSG00000065320/ENSG00000196576/ENSG00000136040/ENSG00000004399/ENSG00000169855/ENSG00000185008/ENSG00000187164/ENSG00000136603/ENSG00000178235	25
GO:1902476	chloride transmembrane transport	21/2947	68/20870	0.000304253	0.00837225	0.00698906	ENSG00000135502/ENSG00000131620/ENSG00000134343/ENSG00000151572/ENSG00000011021/ENSG00000022355/ENSG00000109158/ENSG00000145864/ENSG00000166206/ENSG00000102287/ENSG00000113327/ENSG00000182256/ENSG00000268089/ENSG00000109738/ENSG00000124067/ENSG00000221955/ENSG00000079215/ENSG00000091137/ENSG00000112053/ENSG00000050438/ENSG00000157103	21
GO:0072009	nephron epithelium development	31/2947	117/20870	0.000305536	0.00837225	0.00698906	ENSG00000178301/ENSG00000184937/ENSG00000145536/ENSG00000135744/ENSG00000171456/ENSG00000125378/ENSG00000104327/ENSG00000272398/ENSG00000174059/ENSG00000125931/ENSG00000104313/ENSG00000113578/ENSG00000248905/ENSG00000054598/ENSG00000168621/ENSG00000106571/ENSG00000147257/ENSG00000163909/ENSG00000260027/ENSG00000177508/ENSG00000172037/ENSG00000081189/ENSG00000136997/ENSG00000143867/ENSG00000125618…	31
GO:0035116	embryonic hindlimb morphogenesis	12/2947	29/20870	0.000306225	0.00837225	0.00698906	ENSG00000052850/ENSG00000163132/ENSG00000069011/ENSG00000125378/ENSG00000147257/ENSG00000143867/ENSG00000164920/ENSG00000077092/ENSG00000135111/ENSG00000121075/ENSG00000122691/ENSG00000109906	12
GO:0021915	neural tube development	40/2947	164/20870	0.000306438	0.00837225	0.00698906	ENSG00000204256/ENSG00000117707/ENSG00000101144/ENSG00000163064/ENSG00000158055/ENSG00000007372/ENSG00000182175/ENSG00000145423/ENSG00000176887/ENSG00000114251/ENSG00000128918/ENSG00000182220/ENSG00000168283/ENSG00000125378/ENSG00000168014/ENSG00000090539/ENSG00000164932/ENSG00000164741/ENSG00000142627/ENSG00000146618/ENSG00000164930/ENSG00000143869/ENSG00000106571/ENSG00000120370/ENSG00000083307…	40
GO:0098656	anion transmembrane transport	58/2947	263/20870	0.000306767	0.00837225	0.00698906	ENSG00000135502/ENSG00000092068/ENSG00000125257/ENSG00000135744/ENSG00000131620/ENSG00000134343/ENSG00000151572/ENSG00000011021/ENSG00000022355/ENSG00000109158/ENSG00000145864/ENSG00000166206/ENSG00000102287/ENSG00000113327/ENSG00000182256/ENSG00000268089/ENSG00000109738/ENSG00000152822/ENSG00000243279/ENSG00000116741/ENSG00000117152/ENSG00000124067/ENSG00000221955/ENSG00000139370/ENSG00000152779…	58
GO:0110110	positive regulation of animal organ morphogenesis	13/2947	33/20870	0.000309588	0.00839932	0.00701166	ENSG00000169083/ENSG00000114251/ENSG00000125378/ENSG00000174059/ENSG00000184371/ENSG00000078401/ENSG00000113578/ENSG00000070193/ENSG00000166225/ENSG00000168621/ENSG00000169855/ENSG00000185008/ENSG00000164056	13
GO:0008406	gonad development	51/2947	224/20870	0.000311277	0.00839932	0.00701166	ENSG00000185551/ENSG00000091831/ENSG00000169083/ENSG00000150347/ENSG00000110092/ENSG00000013619/ENSG00000145423/ENSG00000114251/ENSG00000184937/ENSG00000205336/ENSG00000138696/ENSG00000139618/ENSG00000183117/ENSG00000136943/ENSG00000150990/ENSG00000100206/ENSG00000137090/ENSG00000102678/ENSG00000196924/ENSG00000054598/ENSG00000183770/ENSG00000136574/ENSG00000164104/ENSG00000253293/ENSG00000078399…	51
GO:0061326	renal tubule development	28/2947	102/20870	0.000312205	0.00839932	0.00701166	ENSG00000178301/ENSG00000184937/ENSG00000145536/ENSG00000135744/ENSG00000125378/ENSG00000104327/ENSG00000272398/ENSG00000125931/ENSG00000187498/ENSG00000104313/ENSG00000113578/ENSG00000248905/ENSG00000168621/ENSG00000106571/ENSG00000147257/ENSG00000163909/ENSG00000260027/ENSG00000177508/ENSG00000081189/ENSG00000136997/ENSG00000143867/ENSG00000125618/ENSG00000198914/ENSG00000103449/ENSG00000128602…	28
GO:0030308	negative regulation of cell growth	49/2947	213/20870	0.000313043	0.00839932	0.00701166	ENSG00000163132/ENSG00000182175/ENSG00000012171/ENSG00000145423/ENSG00000166949/ENSG00000144560/ENSG00000114251/ENSG00000184937/ENSG00000006831/ENSG00000135744/ENSG00000113916/ENSG00000100739/ENSG00000130303/ENSG00000110888/ENSG00000074276/ENSG00000111276/ENSG00000057019/ENSG00000187323/ENSG00000135333/ENSG00000129682/ENSG00000022267/ENSG00000160211/ENSG00000263761/ENSG00000204389/ENSG00000204388…	49
GO:0045927	positive regulation of growth	62/2947	286/20870	0.000317451	0.00848181	0.00708052	ENSG00000117707/ENSG00000089225/ENSG00000176697/ENSG00000197406/ENSG00000066468/ENSG00000106683/ENSG00000141564/ENSG00000145423/ENSG00000184937/ENSG00000076555/ENSG00000101126/ENSG00000004848/ENSG00000101200/ENSG00000134057/ENSG00000179242/ENSG00000149187/ENSG00000184371/ENSG00000107562/ENSG00000051523/ENSG00000113758/ENSG00000136279/ENSG00000198563/ENSG00000171587/ENSG00000078401/ENSG00000114867…	62
GO:0060602	branch elongation of an epithelium	9/2947	18/20870	0.000319599	0.00850347	0.0070986	ENSG00000091831/ENSG00000066468/ENSG00000114251/ENSG00000125378/ENSG00000113578/ENSG00000070193/ENSG00000128714/ENSG00000121039/ENSG00000164056	9
GO:0045137	development of primary sexual characteristics	52/2947	230/20870	0.000327297	0.00867201	0.00723929	ENSG00000185551/ENSG00000091831/ENSG00000169083/ENSG00000150347/ENSG00000110092/ENSG00000013619/ENSG00000145423/ENSG00000114251/ENSG00000184937/ENSG00000205336/ENSG00000138696/ENSG00000139618/ENSG00000183117/ENSG00000136943/ENSG00000126733/ENSG00000150990/ENSG00000100206/ENSG00000137090/ENSG00000102678/ENSG00000196924/ENSG00000054598/ENSG00000183770/ENSG00000136574/ENSG00000164104/ENSG00000253293…	52
GO:0060070	canonical Wnt signaling pathway	67/2947	315/20870	0.000329595	0.00868563	0.00725066	ENSG00000105880/ENSG00000066468/ENSG00000145423/ENSG00000166949/ENSG00000101849/ENSG00000114251/ENSG00000184675/ENSG00000165566/ENSG00000135299/ENSG00000134982/ENSG00000182220/ENSG00000116128/ENSG00000110888/ENSG00000015133/ENSG00000100888/ENSG00000108821/ENSG00000113712/ENSG00000141551/ENSG00000213923/ENSG00000169118/ENSG00000164932/ENSG00000153071/ENSG00000104901/ENSG00000158813/ENSG00000189319…	67
GO:0030323	respiratory tube development	46/2947	197/20870	0.000330543	0.00868563	0.00725066	ENSG00000117707/ENSG00000089225/ENSG00000066468/ENSG00000103241/ENSG00000101680/ENSG00000115318/ENSG00000159263/ENSG00000176887/ENSG00000232810/ENSG00000114251/ENSG00000128918/ENSG00000171456/ENSG00000165240/ENSG00000125378/ENSG00000187840/ENSG00000126767/ENSG00000113578/ENSG00000070193/ENSG00000102678/ENSG00000106571/ENSG00000147257/ENSG00000083307/ENSG00000189403/ENSG00000171476/ENSG00000106004…	46
GO:0021983	pituitary gland development	16/2947	46/20870	0.000352031	0.00915354	0.00764127	ENSG00000163132/ENSG00000007372/ENSG00000069011/ENSG00000164093/ENSG00000134595/ENSG00000114251/ENSG00000128918/ENSG00000125378/ENSG00000070193/ENSG00000179348/ENSG00000169840/ENSG00000016082/ENSG00000169297/ENSG00000184486/ENSG00000168214/ENSG00000103449	16
GO:0048566	embryonic digestive tract development	16/2947	46/20870	0.000352031	0.00915354	0.00764127	ENSG00000066468/ENSG00000103241/ENSG00000168779/ENSG00000176887/ENSG00000232810/ENSG00000128918/ENSG00000070193/ENSG00000106571/ENSG00000136630/ENSG00000134853/ENSG00000077092/ENSG00000103449/ENSG00000070031/ENSG00000137868/ENSG00000118526/ENSG00000092969	16
GO:0060688	regulation of morphogenesis of a branching structure	20/2947	64/20870	0.000352668	0.00915354	0.00764127	ENSG00000091831/ENSG00000169083/ENSG00000101144/ENSG00000066468/ENSG00000168779/ENSG00000137573/ENSG00000232810/ENSG00000114251/ENSG00000135744/ENSG00000125378/ENSG00000070193/ENSG00000168621/ENSG00000019991/ENSG00000260027/ENSG00000128714/ENSG00000073803/ENSG00000074527/ENSG00000125618/ENSG00000115310/ENSG00000128602	20
GO:0048864	stem cell development	25/2947	88/20870	0.000363562	0.00939793	0.00784529	ENSG00000101144/ENSG00000118257/ENSG00000164093/ENSG00000012171/ENSG00000176887/ENSG00000128918/ENSG00000197043/ENSG00000125378/ENSG00000110880/ENSG00000078401/ENSG00000151617/ENSG00000090776/ENSG00000178568/ENSG00000054598/ENSG00000168621/ENSG00000164107/ENSG00000016082/ENSG00000157168/ENSG00000157927/ENSG00000121039/ENSG00000170381/ENSG00000010319/ENSG00000128602/ENSG00000019549/ENSG00000122691	25
GO:0007548	sex differentiation	61/2947	282/20870	0.00037494	0.0096528	0.00805805	ENSG00000185551/ENSG00000091831/ENSG00000169083/ENSG00000150347/ENSG00000110092/ENSG00000013619/ENSG00000145423/ENSG00000114251/ENSG00000184937/ENSG00000205336/ENSG00000030110/ENSG00000138696/ENSG00000139618/ENSG00000102384/ENSG00000183117/ENSG00000136943/ENSG00000126733/ENSG00000150990/ENSG00000100206/ENSG00000137090/ENSG00000064218/ENSG00000205981/ENSG00000070193/ENSG00000102678/ENSG00000196924…	61
GO:0009954	proximal/distal pattern formation	15/2947	42/20870	0.000385686	0.00984971	0.00822242	ENSG00000163064/ENSG00000128918/ENSG00000131873/ENSG00000144355/ENSG00000070193/ENSG00000106571/ENSG00000253293/ENSG00000078399/ENSG00000170689/ENSG00000180806/ENSG00000128710/ENSG00000128709/ENSG00000177508/ENSG00000143867/ENSG00000204304	15
GO:0031111	negative regulation of microtubule polymerization or depolymerization	15/2947	42/20870	0.000385686	0.00984971	0.00822242	ENSG00000141556/ENSG00000102606/ENSG00000163635/ENSG00000163539/ENSG00000134982/ENSG00000166780/ENSG00000130559/ENSG00000118200/ENSG00000179776/ENSG00000125746/ENSG00000129682/ENSG00000165175/ENSG00000101222/ENSG00000104435/ENSG00000088325	15
GO:0055012	ventricular cardiac muscle cell differentiation	8/2947	15/20870	0.000397655	0.0100745	0.00841005	ENSG00000117707/ENSG00000134057/ENSG00000135547/ENSG00000160789/ENSG00000081189/ENSG00000183072/ENSG00000131759/ENSG00000077092	8
GO:0060766	negative regulation of androgen receptor signaling pathway	8/2947	15/20870	0.000397655	0.0100745	0.00841005	ENSG00000196498/ENSG00000114861/ENSG00000153071/ENSG00000160973/ENSG00000116478/ENSG00000163909/ENSG00000167085/ENSG00000118526	8
GO:0051145	smooth muscle cell differentiation	22/2947	74/20870	0.000401775	0.0101384	0.00846345	ENSG00000061455/ENSG00000066468/ENSG00000103241/ENSG00000131634/ENSG00000125378/ENSG00000120616/ENSG00000070193/ENSG00000102678/ENSG00000164850/ENSG00000135547/ENSG00000169057/ENSG00000118579/ENSG00000081189/ENSG00000199075/ENSG00000284231/ENSG00000196588/ENSG00000186260/ENSG00000131196/ENSG00000101096/ENSG00000072736/ENSG00000100968/ENSG00000135111	22
GO:0043523	regulation of neuron apoptotic process	52/2947	232/20870	0.00040745	0.010241	0.00854908	ENSG00000176697/ENSG00000163064/ENSG00000068024/ENSG00000137203/ENSG00000232810/ENSG00000090861/ENSG00000101126/ENSG00000156709/ENSG00000154188/ENSG00000198908/ENSG00000132906/ENSG00000125931/ENSG00000242689/ENSG00000006210/ENSG00000144355/ENSG00000129521/ENSG00000135333/ENSG00000181104/ENSG00000135472/ENSG00000078579/ENSG00000160211/ENSG00000145864/ENSG00000168621/ENSG00000158301/ENSG00000152208…	52
GO:0021515	cell differentiation in spinal cord	17/2947	51/20870	0.00041365	0.0103559	0.008645	ENSG00000180613/ENSG00000128917/ENSG00000064218/ENSG00000187240/ENSG00000179348/ENSG00000143869/ENSG00000106571/ENSG00000169840/ENSG00000128710/ENSG00000016082/ENSG00000121454/ENSG00000177468/ENSG00000000457/ENSG00000124766/ENSG00000110693/ENSG00000125084/ENSG00000126970	17
GO:0030177	positive regulation of Wnt signaling pathway	36/2947	145/20870	0.000416558	0.0103878	0.00867163	ENSG00000105880/ENSG00000066468/ENSG00000145423/ENSG00000166949/ENSG00000137573/ENSG00000101849/ENSG00000114251/ENSG00000184675/ENSG00000135299/ENSG00000182220/ENSG00000110888/ENSG00000108821/ENSG00000141551/ENSG00000213923/ENSG00000169118/ENSG00000153071/ENSG00000158813/ENSG00000189319/ENSG00000070193/ENSG00000165879/ENSG00000147257/ENSG00000179399/ENSG00000171843/ENSG00000100614/ENSG00000213889…	36
GO:0061387	regulation of extent of cell growth	31/2947	119/20870	0.000421006	0.0104577	0.00872999	ENSG00000176697/ENSG00000106683/ENSG00000182175/ENSG00000012171/ENSG00000114251/ENSG00000101126/ENSG00000143032/ENSG00000179242/ENSG00000107562/ENSG00000113758/ENSG00000136279/ENSG00000187323/ENSG00000079805/ENSG00000092964/ENSG00000171587/ENSG00000135333/ENSG00000129682/ENSG00000203879/ENSG00000167178/ENSG00000137261/ENSG00000123384/ENSG00000073803/ENSG00000091129/ENSG00000065320/ENSG00000115310…	31
GO:1904062	regulation of cation transmembrane transport	78/2947	382/20870	0.000428634	0.0106058	0.00885359	ENSG00000069424/ENSG00000113448/ENSG00000198373/ENSG00000145362/ENSG00000151150/ENSG00000099625/ENSG00000130402/ENSG00000135744/ENSG00000143153/ENSG00000069849/ENSG00000165240/ENSG00000100739/ENSG00000165995/ENSG00000182389/ENSG00000014216/ENSG00000173163/ENSG00000147571/ENSG00000145708/ENSG00000006210/ENSG00000051523/ENSG00000196730/ENSG00000131504/ENSG00000132535/ENSG00000079805/ENSG00000175497…	78
GO:0048596	embryonic camera-type eye morphogenesis	11/2947	26/20870	0.000433346	0.0106396	0.00888178	ENSG00000117707/ENSG00000101144/ENSG00000007372/ENSG00000176887/ENSG00000137203/ENSG00000114251/ENSG00000184254/ENSG00000166225/ENSG00000172845/ENSG00000137868/ENSG00000122691	11
GO:2000050	regulation of non-canonical Wnt signaling pathway	11/2947	26/20870	0.000433346	0.0106396	0.00888178	ENSG00000145423/ENSG00000114251/ENSG00000135299/ENSG00000141551/ENSG00000213923/ENSG00000153071/ENSG00000147257/ENSG00000171843/ENSG00000146374/ENSG00000101222/ENSG00000111186	11
GO:0090263	positive regulation of canonical Wnt signaling pathway	29/2947	109/20870	0.000436485	0.0106448	0.00888612	ENSG00000105880/ENSG00000066468/ENSG00000145423/ENSG00000166949/ENSG00000101849/ENSG00000184675/ENSG00000182220/ENSG00000110888/ENSG00000108821/ENSG00000141551/ENSG00000213923/ENSG00000169118/ENSG00000158813/ENSG00000189319/ENSG00000070193/ENSG00000165879/ENSG00000147257/ENSG00000179399/ENSG00000100614/ENSG00000213889/ENSG00000168214/ENSG00000118518/ENSG00000146374/ENSG00000124766/ENSG00000196562…	29
GO:0048048	embryonic eye morphogenesis	13/2947	34/20870	0.000436905	0.0106448	0.00888612	ENSG00000117707/ENSG00000101144/ENSG00000007372/ENSG00000176887/ENSG00000137203/ENSG00000114251/ENSG00000184254/ENSG00000166225/ENSG00000197614/ENSG00000077092/ENSG00000172845/ENSG00000137868/ENSG00000122691	13
GO:0072080	nephron tubule development	27/2947	99/20870	0.000443455	0.0107288	0.00895628	ENSG00000178301/ENSG00000184937/ENSG00000145536/ENSG00000135744/ENSG00000125378/ENSG00000104327/ENSG00000272398/ENSG00000125931/ENSG00000104313/ENSG00000113578/ENSG00000248905/ENSG00000168621/ENSG00000106571/ENSG00000147257/ENSG00000163909/ENSG00000260027/ENSG00000177508/ENSG00000081189/ENSG00000136997/ENSG00000143867/ENSG00000125618/ENSG00000198914/ENSG00000103449/ENSG00000128602/ENSG00000118526…	27
GO:0007205	protein kinase C-activating G protein-coupled receptor signaling pathway	12/2947	30/20870	0.000445199	0.0107288	0.00895628	ENSG00000172232/ENSG00000100739/ENSG00000187094/ENSG00000168539/ENSG00000102780/ENSG00000274588/ENSG00000149091/ENSG00000078401/ENSG00000181104/ENSG00000135312/ENSG00000123384/ENSG00000148498	12
GO:0048588	developmental cell growth	57/2947	261/20870	0.000445417	0.0107288	0.00895628	ENSG00000124785/ENSG00000176697/ENSG00000204580/ENSG00000106683/ENSG00000100503/ENSG00000118257/ENSG00000182175/ENSG00000012171/ENSG00000114251/ENSG00000101126/ENSG00000120907/ENSG00000135744/ENSG00000170776/ENSG00000170017/ENSG00000143032/ENSG00000179242/ENSG00000107562/ENSG00000113758/ENSG00000136279/ENSG00000187323/ENSG00000133083/ENSG00000198563/ENSG00000079805/ENSG00000092964/ENSG00000171587…	57
GO:0034776	response to histamine	7/2947	12/20870	0.000457808	0.0109444	0.00913623	ENSG00000196639/ENSG00000002726/ENSG00000131504/ENSG00000022355/ENSG00000145864/ENSG00000166206/ENSG00000113327	7
GO:0060601	lateral sprouting from an epithelium	7/2947	12/20870	0.000457808	0.0109444	0.00913623	ENSG00000169083/ENSG00000101144/ENSG00000066468/ENSG00000137573/ENSG00000114251/ENSG00000125378/ENSG00000070193	7
GO:0048546	digestive tract morphogenesis	16/2947	47/20870	0.000464448	0.0110402	0.0092162	ENSG00000066468/ENSG00000103241/ENSG00000145423/ENSG00000168779/ENSG00000166949/ENSG00000176887/ENSG00000114251/ENSG00000125378/ENSG00000070193/ENSG00000136574/ENSG00000106571/ENSG00000136630/ENSG00000128714/ENSG00000134853/ENSG00000137868/ENSG00000118526	16
GO:0060538	skeletal muscle organ development	42/2947	178/20870	0.000465288	0.0110402	0.0092162	ENSG00000185551/ENSG00000068024/ENSG00000069011/ENSG00000168779/ENSG00000176887/ENSG00000184937/ENSG00000100628/ENSG00000116128/ENSG00000003402/ENSG00000011465/ENSG00000108654/ENSG00000154309/ENSG00000187957/ENSG00000167658/ENSG00000049540/ENSG00000154928/ENSG00000183770/ENSG00000163909/ENSG00000136630/ENSG00000113161/ENSG00000152413/ENSG00000128710/ENSG00000128709/ENSG00000167244/ENSG00000169282…	42
GO:0055007	cardiac muscle cell differentiation	35/2947	141/20870	0.000498925	0.0117943	0.00984574	ENSG00000117707/ENSG00000089225/ENSG00000168779/ENSG00000184937/ENSG00000120907/ENSG00000135744/ENSG00000170776/ENSG00000198796/ENSG00000100628/ENSG00000125378/ENSG00000134057/ENSG00000198563/ENSG00000078401/ENSG00000166225/ENSG00000160211/ENSG00000136574/ENSG00000135547/ENSG00000017427/ENSG00000177508/ENSG00000016082/ENSG00000160789/ENSG00000081189/ENSG00000207752/ENSG00000183072/ENSG00000157168…	35
GO:0071559	response to transforming growth factor beta	58/2947	268/20870	0.000507804	0.0119597	0.00998385	ENSG00000066468/ENSG00000144730/ENSG00000166949/ENSG00000176887/ENSG00000134532/ENSG00000114251/ENSG00000140836/ENSG00000179776/ENSG00000129757/ENSG00000003402/ENSG00000125931/ENSG00000163347/ENSG00000163815/ENSG00000108821/ENSG00000164692/ENSG00000134871/ENSG00000153071/ENSG00000144355/ENSG00000079805/ENSG00000112679/ENSG00000078401/ENSG00000138080/ENSG00000160973/ENSG00000140564/ENSG00000130513…	58
GO:0031122	cytoplasmic microtubule organization	19/2947	61/20870	0.000514038	0.0119685	0.00999116	ENSG00000197102/ENSG00000212916/ENSG00000130559/ENSG00000118200/ENSG00000115355/ENSG00000168071/ENSG00000015133/ENSG00000151849/ENSG00000130779/ENSG00000115295/ENSG00000134709/ENSG00000182541/ENSG00000137497/ENSG00000139737/ENSG00000065613/ENSG00000197457/ENSG00000111199/ENSG00000130640/ENSG00000275835	19
GO:0045604	regulation of epidermal cell differentiation	19/2947	61/20870	0.000514038	0.0119685	0.00999116	ENSG00000179593/ENSG00000125378/ENSG00000104413/ENSG00000175832/ENSG00000054598/ENSG00000083307/ENSG00000135547/ENSG00000162891/ENSG00000118263/ENSG00000099284/ENSG00000134323/ENSG00000243678/ENSG00000137497/ENSG00000027075/ENSG00000067900/ENSG00000124193/ENSG00000088002/ENSG00000128016/ENSG00000185650	19
GO:0060038	cardiac muscle cell proliferation	19/2947	61/20870	0.000514038	0.0119685	0.00999116	ENSG00000089225/ENSG00000078900/ENSG00000066468/ENSG00000143995/ENSG00000144560/ENSG00000134057/ENSG00000178568/ENSG00000078579/ENSG00000054598/ENSG00000135547/ENSG00000082482/ENSG00000081189/ENSG00000207752/ENSG00000103034/ENSG00000138207/ENSG00000168214/ENSG00000159216/ENSG00000092969/ENSG00000169946	19
GO:1900274	regulation of phospholipase C activity	15/2947	43/20870	0.000515705	0.0119685	0.00999116	ENSG00000091831/ENSG00000047648/ENSG00000151746/ENSG00000102468/ENSG00000143322/ENSG00000120907/ENSG00000135744/ENSG00000151617/ENSG00000174775/ENSG00000064547/ENSG00000171631/ENSG00000134853/ENSG00000167085/ENSG00000125910/ENSG00000074966	15
GO:0060993	kidney morphogenesis	27/2947	100/20870	0.000526937	0.0121847	0.0101716	ENSG00000101144/ENSG00000184937/ENSG00000145536/ENSG00000135744/ENSG00000171456/ENSG00000125378/ENSG00000104327/ENSG00000125931/ENSG00000178568/ENSG00000104313/ENSG00000113578/ENSG00000070193/ENSG00000248905/ENSG00000168621/ENSG00000106571/ENSG00000147257/ENSG00000260027/ENSG00000177508/ENSG00000136997/ENSG00000143867/ENSG00000125618/ENSG00000103449/ENSG00000128602/ENSG00000124766/ENSG00000118526…	27
GO:0007219	Notch signaling pathway	43/2947	185/20870	0.000561575	0.0128998	0.0107686	ENSG00000180613/ENSG00000204301/ENSG00000198373/ENSG00000101144/ENSG00000185559/ENSG00000117362/ENSG00000138613/ENSG00000113916/ENSG00000111276/ENSG00000197766/ENSG00000090932/ENSG00000128917/ENSG00000144355/ENSG00000187957/ENSG00000135144/ENSG00000070193/ENSG00000054598/ENSG00000179348/ENSG00000135547/ENSG00000163909/ENSG00000166135/ENSG00000128652/ENSG00000119185/ENSG00000106003/ENSG00000100060…	43
GO:0015698	inorganic anion transport	45/2947	196/20870	0.00056192	0.0128998	0.0107686	ENSG00000168065/ENSG00000135502/ENSG00000023839/ENSG00000125257/ENSG00000131620/ENSG00000134343/ENSG00000151572/ENSG00000168748/ENSG00000171365/ENSG00000011021/ENSG00000169583/ENSG00000169504/ENSG00000266964/ENSG00000022355/ENSG00000109158/ENSG00000145864/ENSG00000166206/ENSG00000102287/ENSG00000113327/ENSG00000182256/ENSG00000268089/ENSG00000198356/ENSG00000109738/ENSG00000053918/ENSG00000171631…	45
GO:0033144	negative regulation of intracellular steroid hormone receptor signaling pathway	14/2947	39/20870	0.000564404	0.0129102	0.0107773	ENSG00000196498/ENSG00000114861/ENSG00000111596/ENSG00000172817/ENSG00000153071/ENSG00000160973/ENSG00000116478/ENSG00000163909/ENSG00000149948/ENSG00000016082/ENSG00000169297/ENSG00000167085/ENSG00000118526/ENSG00000160695	14
GO:0006821	chloride transport	31/2947	121/20870	0.000573474	0.0130707	0.0109113	ENSG00000135502/ENSG00000131620/ENSG00000134343/ENSG00000151572/ENSG00000168748/ENSG00000171365/ENSG00000011021/ENSG00000169583/ENSG00000169504/ENSG00000266964/ENSG00000022355/ENSG00000109158/ENSG00000145864/ENSG00000166206/ENSG00000102287/ENSG00000113327/ENSG00000182256/ENSG00000268089/ENSG00000109738/ENSG00000171631/ENSG00000124067/ENSG00000221955/ENSG00000079215/ENSG00000091137/ENSG00000112053…	31
GO:1903034	regulation of response to wounding	42/2947	180/20870	0.000594416	0.0134996	0.0112693	ENSG00000057593/ENSG00000173918/ENSG00000163539/ENSG00000182175/ENSG00000166949/ENSG00000232810/ENSG00000183044/ENSG00000196581/ENSG00000108839/ENSG00000165240/ENSG00000147044/ENSG00000174059/ENSG00000143418/ENSG00000163347/ENSG00000242689/ENSG00000078401/ENSG00000181104/ENSG00000196924/ENSG00000189403/ENSG00000113161/ENSG00000173083/ENSG00000174775/ENSG00000248099/ENSG00000137261/ENSG00000123384…	42
GO:0001759	organ induction	10/2947	23/20870	0.000608703	0.013726	0.0114583	ENSG00000169083/ENSG00000114251/ENSG00000125378/ENSG00000113578/ENSG00000070193/ENSG00000166225/ENSG00000168621/ENSG00000169855/ENSG00000185008/ENSG00000164056	10
GO:0021895	cerebral cortex neuron differentiation	10/2947	23/20870	0.000608703	0.013726	0.0114583	ENSG00000162374/ENSG00000004848/ENSG00000116254/ENSG00000144355/ENSG00000135638/ENSG00000153266/ENSG00000106852/ENSG00000112333/ENSG00000079482/ENSG00000169375	10
GO:0055021	regulation of cardiac muscle tissue growth	23/2947	81/20870	0.000618509	0.0138489	0.0115609	ENSG00000089225/ENSG00000078900/ENSG00000066468/ENSG00000143995/ENSG00000144560/ENSG00000134057/ENSG00000198563/ENSG00000078401/ENSG00000178568/ENSG00000078579/ENSG00000160211/ENSG00000135547/ENSG00000017427/ENSG00000082482/ENSG00000081189/ENSG00000207752/ENSG00000129484/ENSG00000138207/ENSG00000168214/ENSG00000116741/ENSG00000117152/ENSG00000159216/ENSG00000169946	23
GO:0061333	renal tubule morphogenesis	23/2947	81/20870	0.000618509	0.0138489	0.0115609	ENSG00000184937/ENSG00000145536/ENSG00000135744/ENSG00000125378/ENSG00000125931/ENSG00000187498/ENSG00000104313/ENSG00000113578/ENSG00000248905/ENSG00000168621/ENSG00000106571/ENSG00000147257/ENSG00000260027/ENSG00000177508/ENSG00000081189/ENSG00000136997/ENSG00000143867/ENSG00000125618/ENSG00000103449/ENSG00000128602/ENSG00000118526/ENSG00000126562/ENSG00000125084	23
GO:0002088	lens development in camera-type eye	24/2947	86/20870	0.00062735	0.0139976	0.011685	ENSG00000117707/ENSG00000102878/ENSG00000143995/ENSG00000007372/ENSG00000166949/ENSG00000176887/ENSG00000114251/ENSG00000138443/ENSG00000137936/ENSG00000125378/ENSG00000111276/ENSG00000100053/ENSG00000127377/ENSG00000142627/ENSG00000166225/ENSG00000121634/ENSG00000188501/ENSG00000188158/ENSG00000127252/ENSG00000136603/ENSG00000198369/ENSG00000164056/ENSG00000146350/ENSG00000111186	24
GO:0008361	regulation of cell size	45/2947	197/20870	0.00063042	0.0140169	0.0117012	ENSG00000178301/ENSG00000176697/ENSG00000106683/ENSG00000182175/ENSG00000141564/ENSG00000012171/ENSG00000114251/ENSG00000101126/ENSG00000240583/ENSG00000165240/ENSG00000143032/ENSG00000179242/ENSG00000011021/ENSG00000107562/ENSG00000113758/ENSG00000136279/ENSG00000187323/ENSG00000155792/ENSG00000079805/ENSG00000092964/ENSG00000171587/ENSG00000078401/ENSG00000135333/ENSG00000129682/ENSG00000203879…	45
GO:0003401	axis elongation	11/2947	27/20870	0.000638541	0.0140501	0.0117289	ENSG00000091831/ENSG00000066468/ENSG00000145423/ENSG00000114251/ENSG00000125378/ENSG00000113578/ENSG00000070193/ENSG00000128714/ENSG00000184634/ENSG00000121039/ENSG00000164056	11
GO:0060512	prostate gland morphogenesis	11/2947	27/20870	0.000638541	0.0140501	0.0117289	ENSG00000091831/ENSG00000169083/ENSG00000101144/ENSG00000066468/ENSG00000137573/ENSG00000114251/ENSG00000125378/ENSG00000172817/ENSG00000070193/ENSG00000166225/ENSG00000128714	11
GO:0071425	hematopoietic stem cell proliferation	11/2947	27/20870	0.000638541	0.0140501	0.0117289	ENSG00000085276/ENSG00000145423/ENSG00000114251/ENSG00000174059/ENSG00000136504/ENSG00000244754/ENSG00000071994/ENSG00000159216/ENSG00000125084/ENSG00000169884/ENSG00000250067	11
GO:0061005	cell differentiation involved in kidney development	19/2947	62/20870	0.000644279	0.0141275	0.0117935	ENSG00000107796/ENSG00000184937/ENSG00000184675/ENSG00000171456/ENSG00000125378/ENSG00000272398/ENSG00000174059/ENSG00000125931/ENSG00000168621/ENSG00000106571/ENSG00000177464/ENSG00000172037/ENSG00000081189/ENSG00000143867/ENSG00000125618/ENSG00000198914/ENSG00000103449/ENSG00000128602/ENSG00000118526	19
GO:0008584	male gonad development	35/2947	143/20870	0.000658158	0.0143822	0.0120061	ENSG00000091831/ENSG00000169083/ENSG00000150347/ENSG00000110092/ENSG00000013619/ENSG00000145423/ENSG00000114251/ENSG00000184937/ENSG00000205336/ENSG00000183117/ENSG00000136943/ENSG00000150990/ENSG00000137090/ENSG00000102678/ENSG00000196924/ENSG00000136574/ENSG00000164104/ENSG00000253293/ENSG00000078399/ENSG00000133835/ENSG00000122641/ENSG00000248099/ENSG00000169297/ENSG00000198400/ENSG00000176046…	35
GO:0048639	positive regulation of developmental growth	44/2947	192/20870	0.000669705	0.0145844	0.0121749	ENSG00000117707/ENSG00000089225/ENSG00000176697/ENSG00000197406/ENSG00000066468/ENSG00000106683/ENSG00000184937/ENSG00000076555/ENSG00000101126/ENSG00000004848/ENSG00000134057/ENSG00000179242/ENSG00000149187/ENSG00000184371/ENSG00000107562/ENSG00000113758/ENSG00000136279/ENSG00000198563/ENSG00000171587/ENSG00000078401/ENSG00000178568/ENSG00000203879/ENSG00000121853/ENSG00000135547/ENSG00000136630…	44
GO:0048013	ephrin receptor signaling pathway	17/2947	53/20870	0.000684696	0.0148095	0.0123628	ENSG00000102606/ENSG00000185046/ENSG00000214944/ENSG00000143590/ENSG00000090776/ENSG00000142627/ENSG00000044524/ENSG00000080224/ENSG00000135333/ENSG00000154928/ENSG00000160145/ENSG00000087245/ENSG00000071051/ENSG00000198400/ENSG00000140538/ENSG00000077264/ENSG00000168214	17
GO:0085029	extracellular matrix assembly	17/2947	53/20870	0.000684696	0.0148095	0.0123628	ENSG00000168477/ENSG00000163539/ENSG00000166949/ENSG00000135744/ENSG00000165240/ENSG00000164692/ENSG00000138080/ENSG00000170961/ENSG00000103044/ENSG00000172037/ENSG00000196878/ENSG00000166482/ENSG00000074527/ENSG00000162631/ENSG00000144824/ENSG00000103056/ENSG00000187720	17
GO:0046660	female sex differentiation	30/2947	117/20870	0.000687193	0.0148131	0.0123658	ENSG00000185551/ENSG00000091831/ENSG00000150347/ENSG00000114251/ENSG00000184937/ENSG00000030110/ENSG00000138696/ENSG00000139618/ENSG00000183117/ENSG00000126733/ENSG00000100206/ENSG00000070193/ENSG00000054598/ENSG00000183770/ENSG00000044574/ENSG00000138413/ENSG00000122641/ENSG00000174697/ENSG00000057468/ENSG00000176046/ENSG00000134853/ENSG00000138207/ENSG00000185008/ENSG00000142168/ENSG00000137868…	30
GO:0072109	glomerular mesangium development	8/2947	16/20870	0.000697023	0.0149742	0.0125003	ENSG00000107796/ENSG00000101144/ENSG00000184937/ENSG00000125378/ENSG00000174059/ENSG00000003402/ENSG00000177464/ENSG00000160712	8
GO:0006939	smooth muscle contraction	29/2947	112/20870	0.000706038	0.0151168	0.0126194	ENSG00000107796/ENSG00000102468/ENSG00000137573/ENSG00000183044/ENSG00000120907/ENSG00000135744/ENSG00000166313/ENSG00000163697/ENSG00000168398/ENSG00000133019/ENSG00000080644/ENSG00000130176/ENSG00000078401/ENSG00000151617/ENSG00000181104/ENSG00000168621/ENSG00000121853/ENSG00000164850/ENSG00000179546/ENSG00000101405/ENSG00000163421/ENSG00000116741/ENSG00000067900/ENSG00000183023/ENSG00000142168…	29
GO:0060078	regulation of postsynaptic membrane potential	36/2947	149/20870	0.000718641	0.015335	0.0128015	ENSG00000179915/ENSG00000183044/ENSG00000175866/ENSG00000168539/ENSG00000080644/ENSG00000169684/ENSG00000132535/ENSG00000102466/ENSG00000022355/ENSG00000109158/ENSG00000145864/ENSG00000102287/ENSG00000113327/ENSG00000182256/ENSG00000109738/ENSG00000155511/ENSG00000152208/ENSG00000171189/ENSG00000164418/ENSG00000161509/ENSG00000152822/ENSG00000169057/ENSG00000081189/ENSG00000087053/ENSG00000169760…	36
GO:0003158	endothelium development	38/2947	160/20870	0.000739445	0.0157255	0.0131275	ENSG00000185551/ENSG00000204301/ENSG00000113448/ENSG00000117707/ENSG00000114861/ENSG00000120075/ENSG00000232810/ENSG00000151388/ENSG00000108839/ENSG00000178878/ENSG00000125378/ENSG00000136280/ENSG00000174059/ENSG00000179776/ENSG00000163347/ENSG00000169504/ENSG00000204291/ENSG00000182871/ENSG00000128917/ENSG00000113578/ENSG00000263761/ENSG00000265107/ENSG00000135547/ENSG00000128052/ENSG00000284038…	38
GO:0055001	muscle cell development	46/2947	204/20870	0.000741886	0.0157255	0.0131275	ENSG00000117707/ENSG00000089225/ENSG00000145362/ENSG00000068024/ENSG00000168779/ENSG00000130402/ENSG00000120907/ENSG00000135744/ENSG00000170776/ENSG00000198796/ENSG00000100628/ENSG00000125378/ENSG00000134057/ENSG00000003402/ENSG00000159176/ENSG00000198563/ENSG00000187957/ENSG00000078401/ENSG00000160211/ENSG00000136574/ENSG00000135547/ENSG00000152413/ENSG00000017427/ENSG00000016082/ENSG00000157119…	46
GO:0072028	nephron morphogenesis	23/2947	82/20870	0.000746409	0.0157598	0.0131561	ENSG00000101144/ENSG00000184937/ENSG00000145536/ENSG00000135744/ENSG00000125378/ENSG00000125931/ENSG00000178568/ENSG00000104313/ENSG00000113578/ENSG00000248905/ENSG00000168621/ENSG00000106571/ENSG00000147257/ENSG00000260027/ENSG00000177508/ENSG00000136997/ENSG00000143867/ENSG00000125618/ENSG00000103449/ENSG00000128602/ENSG00000118526/ENSG00000126562/ENSG00000125084	23
GO:0035904	aorta development	18/2947	58/20870	0.000749898	0.0157598	0.0131561	ENSG00000117707/ENSG00000163638/ENSG00000057657/ENSG00000049192/ENSG00000128917/ENSG00000104313/ENSG00000160973/ENSG00000135547/ENSG00000174697/ENSG00000123384/ENSG00000070614/ENSG00000186642/ENSG00000004399/ENSG00000168214/ENSG00000169855/ENSG00000185008/ENSG00000124766/ENSG00000092969	18
GO:0046546	development of primary male sexual characteristics	35/2947	144/20870	0.000753418	0.0157598	0.0131561	ENSG00000091831/ENSG00000169083/ENSG00000150347/ENSG00000110092/ENSG00000013619/ENSG00000145423/ENSG00000114251/ENSG00000184937/ENSG00000205336/ENSG00000183117/ENSG00000136943/ENSG00000150990/ENSG00000137090/ENSG00000102678/ENSG00000196924/ENSG00000136574/ENSG00000164104/ENSG00000253293/ENSG00000078399/ENSG00000133835/ENSG00000122641/ENSG00000248099/ENSG00000169297/ENSG00000198400/ENSG00000176046…	35
GO:0048565	digestive tract development	35/2947	144/20870	0.000753418	0.0157598	0.0131561	ENSG00000052850/ENSG00000066468/ENSG00000103241/ENSG00000057657/ENSG00000145423/ENSG00000168779/ENSG00000166949/ENSG00000176887/ENSG00000232810/ENSG00000114251/ENSG00000128918/ENSG00000125378/ENSG00000134057/ENSG00000100888/ENSG00000173406/ENSG00000070193/ENSG00000176678/ENSG00000136574/ENSG00000106571/ENSG00000136630/ENSG00000106004/ENSG00000128714/ENSG00000053918/ENSG00000109705/ENSG00000134853…	35
GO:0007435	salivary gland morphogenesis	14/2947	40/20870	0.000756589	0.0157743	0.0131682	ENSG00000101144/ENSG00000066468/ENSG00000101680/ENSG00000007372/ENSG00000232810/ENSG00000158813/ENSG00000070193/ENSG00000019991/ENSG00000147862/ENSG00000074527/ENSG00000004399/ENSG00000092969/ENSG00000119699/ENSG00000128791	14
GO:0051056	regulation of small GTPase mediated signal transduction	70/2947	342/20870	0.000764908	0.0158956	0.0132695	ENSG00000126217/ENSG00000144711/ENSG00000185989/ENSG00000047648/ENSG00000108669/ENSG00000143322/ENSG00000159842/ENSG00000205336/ENSG00000120907/ENSG00000170776/ENSG00000186635/ENSG00000146376/ENSG00000128805/ENSG00000138639/ENSG00000159314/ENSG00000006740/ENSG00000111348/ENSG00000142632/ENSG00000214944/ENSG00000136002/ENSG00000131089/ENSG00000113916/ENSG00000186716/ENSG00000183323/ENSG00000106069…	70
GO:0048146	positive regulation of fibroblast proliferation	16/2947	49/20870	0.000783628	0.0162316	0.0135499	ENSG00000091831/ENSG00000114251/ENSG00000135744/ENSG00000240583/ENSG00000168283/ENSG00000134057/ENSG00000162733/ENSG00000070193/ENSG00000017427/ENSG00000136997/ENSG00000164258/ENSG00000134853/ENSG00000170890/ENSG00000140464/ENSG00000062650/ENSG00000125084	16
GO:0007519	skeletal muscle tissue development	39/2947	166/20870	0.000793874	0.0163904	0.0136825	ENSG00000185551/ENSG00000068024/ENSG00000069011/ENSG00000168779/ENSG00000176887/ENSG00000100628/ENSG00000116128/ENSG00000003402/ENSG00000011465/ENSG00000108654/ENSG00000187957/ENSG00000167658/ENSG00000049540/ENSG00000154928/ENSG00000183770/ENSG00000163909/ENSG00000136630/ENSG00000113161/ENSG00000152413/ENSG00000128710/ENSG00000128709/ENSG00000167244/ENSG00000169282/ENSG00000157119/ENSG00000081189…	39
GO:0048545	response to steroid hormone	75/2947	372/20870	0.00079787	0.0164196	0.0137069	ENSG00000091831/ENSG00000196482/ENSG00000196498/ENSG00000169083/ENSG00000101144/ENSG00000110092/ENSG00000114861/ENSG00000048540/ENSG00000204231/ENSG00000232810/ENSG00000023839/ENSG00000140526/ENSG00000156709/ENSG00000108602/ENSG00000240583/ENSG00000168283/ENSG00000125378/ENSG00000012822/ENSG00000132906/ENSG00000129596/ENSG00000003402/ENSG00000163347/ENSG00000111596/ENSG00000108821/ENSG00000147571…	75
GO:0007613	memory	33/2947	134/20870	0.000823746	0.0168553	0.0140706	ENSG00000176697/ENSG00000118971/ENSG00000196639/ENSG00000102468/ENSG00000164742/ENSG00000101126/ENSG00000104327/ENSG00000187094/ENSG00000107864/ENSG00000183117/ENSG00000148730/ENSG00000129682/ENSG00000155511/ENSG00000082482/ENSG00000162761/ENSG00000169057/ENSG00000100968/ENSG00000225950/ENSG00000101405/ENSG00000120727/ENSG00000145632/ENSG00000067606/ENSG00000165186/ENSG00000105894/ENSG00000058335…	33
GO:0030522	intracellular receptor signaling pathway	63/2947	302/20870	0.000825926	0.0168553	0.0140706	ENSG00000185551/ENSG00000091831/ENSG00000196482/ENSG00000196498/ENSG00000169083/ENSG00000108771/ENSG00000114861/ENSG00000048540/ENSG00000175745/ENSG00000069667/ENSG00000204231/ENSG00000130402/ENSG00000128918/ENSG00000179593/ENSG00000171456/ENSG00000012822/ENSG00000111596/ENSG00000125831/ENSG00000019186/ENSG00000172817/ENSG00000153071/ENSG00000057019/ENSG00000108654/ENSG00000137628/ENSG00000119715…	63
GO:0060603	mammary gland duct morphogenesis	13/2947	36/20870	0.000826993	0.0168553	0.0140706	ENSG00000091831/ENSG00000169083/ENSG00000204580/ENSG00000066468/ENSG00000114251/ENSG00000184371/ENSG00000183117/ENSG00000142627/ENSG00000070193/ENSG00000065320/ENSG00000140464/ENSG00000171243/ENSG00000135111	13
GO:0045682	regulation of epidermis development	20/2947	68/20870	0.000841595	0.0170695	0.0142494	ENSG00000179593/ENSG00000125378/ENSG00000104413/ENSG00000175832/ENSG00000054598/ENSG00000083307/ENSG00000135547/ENSG00000162891/ENSG00000118263/ENSG00000099284/ENSG00000134323/ENSG00000243678/ENSG00000137497/ENSG00000112033/ENSG00000027075/ENSG00000067900/ENSG00000124193/ENSG00000088002/ENSG00000128016/ENSG00000185650	20
GO:0030258	lipid modification	52/2947	239/20870	0.000844743	0.0170695	0.0142494	ENSG00000087008/ENSG00000106617/ENSG00000173208/ENSG00000160179/ENSG00000076555/ENSG00000122971/ENSG00000072778/ENSG00000101473/ENSG00000168306/ENSG00000197894/ENSG00000006831/ENSG00000135744/ENSG00000108839/ENSG00000179593/ENSG00000135454/ENSG00000100422/ENSG00000188452/ENSG00000110090/ENSG00000161544/ENSG00000019186/ENSG00000130649/ENSG00000102780/ENSG00000274588/ENSG00000149091/ENSG00000140374…	52
GO:0032332	positive regulation of chondrocyte differentiation	9/2947	20/20870	0.000845556	0.0170695	0.0142494	ENSG00000166949/ENSG00000134532/ENSG00000138696/ENSG00000106571/ENSG00000272573/ENSG00000124813/ENSG00000110693/ENSG00000109906/ENSG00000165804	9
GO:0070167	regulation of biomineral tissue development	27/2947	103/20870	0.000865516	0.0174171	0.0145396	ENSG00000101144/ENSG00000166949/ENSG00000137203/ENSG00000183337/ENSG00000125378/ENSG00000138696/ENSG00000142871/ENSG00000162733/ENSG00000152592/ENSG00000135547/ENSG00000187608/ENSG00000133116/ENSG00000081189/ENSG00000188554/ENSG00000164867/ENSG00000143867/ENSG00000164920/ENSG00000173868/ENSG00000120899/ENSG00000105894/ENSG00000067900/ENSG00000183023/ENSG00000119699/ENSG00000183160/ENSG00000130529…	27
GO:0007163	establishment or maintenance of cell polarity	50/2947	228/20870	0.000874074	0.0175339	0.0146371	ENSG00000150672/ENSG00000174672/ENSG00000198752/ENSG00000163539/ENSG00000108669/ENSG00000103241/ENSG00000125337/ENSG00000101680/ENSG00000072518/ENSG00000168502/ENSG00000007372/ENSG00000114251/ENSG00000198796/ENSG00000029534/ENSG00000240583/ENSG00000179776/ENSG00000169504/ENSG00000116641/ENSG00000146425/ENSG00000154928/ENSG00000149557/ENSG00000070193/ENSG00000129682/ENSG00000151474/ENSG00000114541…	50
GO:0008593	regulation of Notch signaling pathway	26/2947	98/20870	0.000881182	0.0175656	0.0146636	ENSG00000180613/ENSG00000198373/ENSG00000101144/ENSG00000185559/ENSG00000113916/ENSG00000128917/ENSG00000144355/ENSG00000135144/ENSG00000070193/ENSG00000179348/ENSG00000135547/ENSG00000166135/ENSG00000119185/ENSG00000106003/ENSG00000100060/ENSG00000164867/ENSG00000169855/ENSG00000185008/ENSG00000181830/ENSG00000080189/ENSG00000168610/ENSG00000092969/ENSG00000168785/ENSG00000175894/ENSG00000125084…	26
GO:0055013	cardiac muscle cell development	26/2947	98/20870	0.000881182	0.0175656	0.0146636	ENSG00000117707/ENSG00000089225/ENSG00000168779/ENSG00000120907/ENSG00000135744/ENSG00000170776/ENSG00000198796/ENSG00000100628/ENSG00000125378/ENSG00000134057/ENSG00000198563/ENSG00000078401/ENSG00000160211/ENSG00000136574/ENSG00000135547/ENSG00000017427/ENSG00000016082/ENSG00000160789/ENSG00000207752/ENSG00000183072/ENSG00000129484/ENSG00000134853/ENSG00000116741/ENSG00000117152/ENSG00000183023…	26
GO:0031114	regulation of microtubule depolymerization	12/2947	32/20870	0.000884789	0.0175824	0.0146776	ENSG00000163635/ENSG00000163539/ENSG00000134982/ENSG00000166780/ENSG00000130559/ENSG00000118200/ENSG00000129682/ENSG00000165175/ENSG00000101222/ENSG00000104435/ENSG00000088325/ENSG00000111199	12
GO:0001953	negative regulation of cell-matrix adhesion	15/2947	45/20870	0.000890095	0.0176136	0.0147036	ENSG00000047648/ENSG00000163539/ENSG00000196581/ENSG00000113916/ENSG00000147044/ENSG00000110880/ENSG00000164741/ENSG00000112679/ENSG00000119185/ENSG00000123384/ENSG00000144824/ENSG00000145675/ENSG00000179051/ENSG00000170381/ENSG00000106366	15
GO:0060191	regulation of lipase activity	25/2947	93/20870	0.000892249	0.0176136	0.0147036	ENSG00000091831/ENSG00000047648/ENSG00000151746/ENSG00000066468/ENSG00000102468/ENSG00000143322/ENSG00000120907/ENSG00000135744/ENSG00000120805/ENSG00000142871/ENSG00000151617/ENSG00000068078/ENSG00000140564/ENSG00000174775/ENSG00000064547/ENSG00000123384/ENSG00000171631/ENSG00000134853/ENSG00000167085/ENSG00000170890/ENSG00000153246/ENSG00000067606/ENSG00000116741/ENSG00000125910/ENSG00000074966	25
GO:1905475	regulation of protein localization to membrane	43/2947	189/20870	0.000894668	0.0176136	0.0147036	ENSG00000151150/ENSG00000169083/ENSG00000168502/ENSG00000073921/ENSG00000232810/ENSG00000006740/ENSG00000130762/ENSG00000166997/ENSG00000153071/ENSG00000175497/ENSG00000142627/ENSG00000044524/ENSG00000141736/ENSG00000203879/ENSG00000121853/ENSG00000147257/ENSG00000179399/ENSG00000164850/ENSG00000174775/ENSG00000124313/ENSG00000119185/ENSG00000180509/ENSG00000123384/ENSG00000107643/ENSG00000170262…	43
GO:0030178	negative regulation of Wnt signaling pathway	41/2947	178/20870	0.000900017	0.0176642	0.0147459	ENSG00000167693/ENSG00000145423/ENSG00000144560/ENSG00000114251/ENSG00000198796/ENSG00000184675/ENSG00000165566/ENSG00000135299/ENSG00000134982/ENSG00000015133/ENSG00000100888/ENSG00000125931/ENSG00000113712/ENSG00000164932/ENSG00000153071/ENSG00000104901/ENSG00000164930/ENSG00000106571/ENSG00000147257/ENSG00000133937/ENSG00000116478/ENSG00000016082/ENSG00000077684/ENSG00000123384/ENSG00000207752…	41
GO:0003148	outflow tract septum morphogenesis	10/2947	24/20870	0.000912257	0.0177536	0.0148205	ENSG00000066468/ENSG00000118257/ENSG00000125378/ENSG00000016082/ENSG00000183072/ENSG00000197702/ENSG00000169855/ENSG00000185008/ENSG00000092969/ENSG00000169946	10
GO:0021871	forebrain regionalization	10/2947	24/20870	0.000912257	0.0177536	0.0148205	ENSG00000180613/ENSG00000007372/ENSG00000205336/ENSG00000125378/ENSG00000135638/ENSG00000170370/ENSG00000128610/ENSG00000153266/ENSG00000106571/ENSG00000125084	10
GO:0003171	atrioventricular valve development	11/2947	28/20870	0.000918532	0.0177536	0.0148205	ENSG00000089225/ENSG00000142871/ENSG00000136574/ENSG00000265107/ENSG00000135547/ENSG00000163909/ENSG00000135679/ENSG00000124766/ENSG00000092969/ENSG00000122691/ENSG00000179588	11
GO:0007026	negative regulation of microtubule depolymerization	11/2947	28/20870	0.000918532	0.0177536	0.0148205	ENSG00000163635/ENSG00000163539/ENSG00000134982/ENSG00000166780/ENSG00000130559/ENSG00000118200/ENSG00000129682/ENSG00000165175/ENSG00000101222/ENSG00000104435/ENSG00000088325	11
GO:0072202	cell differentiation involved in metanephros development	11/2947	28/20870	0.000918532	0.0177536	0.0148205	ENSG00000125378/ENSG00000174059/ENSG00000125931/ENSG00000168621/ENSG00000172037/ENSG00000143867/ENSG00000125618/ENSG00000198914/ENSG00000103449/ENSG00000128602/ENSG00000118526	11
GO:0002064	epithelial cell development	53/2947	246/20870	0.000960838	0.0185151	0.0154562	ENSG00000091831/ENSG00000204301/ENSG00000113448/ENSG00000117707/ENSG00000107796/ENSG00000169083/ENSG00000007372/ENSG00000057657/ENSG00000232810/ENSG00000114251/ENSG00000138443/ENSG00000171456/ENSG00000125378/ENSG00000015133/ENSG00000136280/ENSG00000179776/ENSG00000163347/ENSG00000169504/ENSG00000204291/ENSG00000182871/ENSG00000164488/ENSG00000137090/ENSG00000167968/ENSG00000142627/ENSG00000110723…	53
GO:0031330	negative regulation of cellular catabolic process	62/2947	298/20870	0.00096903	0.0186165	0.0155408	ENSG00000164916/ENSG00000178301/ENSG00000162374/ENSG00000141568/ENSG00000159217/ENSG00000125337/ENSG00000076555/ENSG00000120907/ENSG00000104081/ENSG00000152430/ENSG00000130826/ENSG00000147677/ENSG00000114867/ENSG00000139160/ENSG00000149557/ENSG00000102081/ENSG00000140564/ENSG00000136574/ENSG00000168621/ENSG00000019991/ENSG00000263528/ENSG00000110324/ENSG00000157119/ENSG00000174697/ENSG00000116678…	62
GO:0032355	response to estradiol	35/2947	146/20870	0.000980941	0.0187866	0.0156828	ENSG00000185551/ENSG00000091831/ENSG00000057593/ENSG00000196498/ENSG00000101144/ENSG00000110092/ENSG00000023839/ENSG00000135744/ENSG00000156709/ENSG00000128918/ENSG00000132906/ENSG00000121691/ENSG00000111276/ENSG00000003402/ENSG00000108821/ENSG00000145708/ENSG00000167658/ENSG00000124098/ENSG00000070193/ENSG00000100031/ENSG00000121853/ENSG00000164850/ENSG00000157219/ENSG00000174697/ENSG00000181019…	35
GO:0042487	regulation of odontogenesis of dentin-containing tooth	6/2947	10/20870	0.000992653	0.0187866	0.0156828	ENSG00000125378/ENSG00000184371/ENSG00000064218/ENSG00000124813/ENSG00000164761/ENSG00000135925	6
GO:0060272	embryonic skeletal joint morphogenesis	6/2947	10/20870	0.000992653	0.0187866	0.0156828	ENSG00000101144/ENSG00000168779/ENSG00000125378/ENSG00000114378/ENSG00000143867/ENSG00000164920	6
GO:0060513	prostatic bud formation	6/2947	10/20870	0.000992653	0.0187866	0.0156828	ENSG00000169083/ENSG00000101144/ENSG00000137573/ENSG00000114251/ENSG00000125378/ENSG00000070193	6
GO:0060539	diaphragm development	6/2947	10/20870	0.000992653	0.0187866	0.0156828	ENSG00000184937/ENSG00000154309/ENSG00000169282/ENSG00000178860/ENSG00000137868/ENSG00000118526	6
GO:0010863	positive regulation of phospholipase C activity	14/2947	41/20870	0.00100122	0.018818	0.015709	ENSG00000091831/ENSG00000047648/ENSG00000102468/ENSG00000143322/ENSG00000120907/ENSG00000135744/ENSG00000151617/ENSG00000174775/ENSG00000064547/ENSG00000171631/ENSG00000134853/ENSG00000167085/ENSG00000125910/ENSG00000074966	14
GO:0030509	BMP signaling pathway	37/2947	157/20870	0.00100266	0.018818	0.015709	ENSG00000105880/ENSG00000101144/ENSG00000163132/ENSG00000182175/ENSG00000145423/ENSG00000166949/ENSG00000176887/ENSG00000137573/ENSG00000114251/ENSG00000125378/ENSG00000138696/ENSG00000142871/ENSG00000179776/ENSG00000090539/ENSG00000108654/ENSG00000144355/ENSG00000136574/ENSG00000130513/ENSG00000263761/ENSG00000143869/ENSG00000147257/ENSG00000199075/ENSG00000158747/ENSG00000137497/ENSG00000168214…	37
GO:0070169	positive regulation of biomineral tissue development	16/2947	50/20870	0.00100319	0.018818	0.015709	ENSG00000101144/ENSG00000166949/ENSG00000137203/ENSG00000125378/ENSG00000138696/ENSG00000142871/ENSG00000187608/ENSG00000133116/ENSG00000081189/ENSG00000143867/ENSG00000164920/ENSG00000105894/ENSG00000183023/ENSG00000119699/ENSG00000183160/ENSG00000169884	16
GO:0046661	male sex differentiation	39/2947	168/20870	0.00101207	0.0189146	0.0157897	ENSG00000091831/ENSG00000169083/ENSG00000150347/ENSG00000110092/ENSG00000013619/ENSG00000145423/ENSG00000114251/ENSG00000184937/ENSG00000205336/ENSG00000183117/ENSG00000136943/ENSG00000150990/ENSG00000137090/ENSG00000064218/ENSG00000070193/ENSG00000102678/ENSG00000196924/ENSG00000136574/ENSG00000164104/ENSG00000253293/ENSG00000078399/ENSG00000128714/ENSG00000133835/ENSG00000122641/ENSG00000248099…	39
GO:0055006	cardiac cell development	27/2947	104/20870	0.00101429	0.0189146	0.0157897	ENSG00000117707/ENSG00000089225/ENSG00000168779/ENSG00000120907/ENSG00000135744/ENSG00000170776/ENSG00000198796/ENSG00000100628/ENSG00000125378/ENSG00000134057/ENSG00000198563/ENSG00000078401/ENSG00000160211/ENSG00000136574/ENSG00000135547/ENSG00000017427/ENSG00000016082/ENSG00000160789/ENSG00000207752/ENSG00000183072/ENSG00000129484/ENSG00000134853/ENSG00000116741/ENSG00000117152/ENSG00000183023…	27
GO:0031099	regeneration	46/2947	207/20870	0.00102716	0.0190986	0.0159433	ENSG00000057593/ENSG00000110092/ENSG00000162374/ENSG00000182175/ENSG00000091879/ENSG00000030110/ENSG00000116128/ENSG00000134057/ENSG00000111276/ENSG00000143418/ENSG00000003402/ENSG00000163347/ENSG00000242689/ENSG00000104324/ENSG00000110090/ENSG00000107562/ENSG00000178568/ENSG00000070193/ENSG00000196924/ENSG00000136574/ENSG00000106571/ENSG00000019991/ENSG00000171476/ENSG00000017427/ENSG00000016082…	46
GO:0098661	inorganic anion transmembrane transport	25/2947	94/20870	0.00105511	0.0195464	0.0163171	ENSG00000135502/ENSG00000131620/ENSG00000134343/ENSG00000151572/ENSG00000011021/ENSG00000022355/ENSG00000109158/ENSG00000145864/ENSG00000166206/ENSG00000102287/ENSG00000113327/ENSG00000182256/ENSG00000268089/ENSG00000109738/ENSG00000124067/ENSG00000221955/ENSG00000079215/ENSG00000102078/ENSG00000075415/ENSG00000091137/ENSG00000112053/ENSG00000137700/ENSG00000088836/ENSG00000050438/ENSG00000157103	25
GO:0007611	learning or memory	62/2947	299/20870	0.00105739	0.0195464	0.0163171	ENSG00000135298/ENSG00000176697/ENSG00000118971/ENSG00000085788/ENSG00000162374/ENSG00000163064/ENSG00000196639/ENSG00000102468/ENSG00000179915/ENSG00000073921/ENSG00000164742/ENSG00000138031/ENSG00000101126/ENSG00000155966/ENSG00000135744/ENSG00000198908/ENSG00000104327/ENSG00000187094/ENSG00000107864/ENSG00000147571/ENSG00000145708/ENSG00000183117/ENSG00000132535/ENSG00000148730/ENSG00000129682…	62
GO:0030500	regulation of bone mineralization	23/2947	84/20870	0.00107225	0.0197637	0.0164985	ENSG00000101144/ENSG00000166949/ENSG00000137203/ENSG00000183337/ENSG00000125378/ENSG00000138696/ENSG00000142871/ENSG00000162733/ENSG00000187608/ENSG00000133116/ENSG00000081189/ENSG00000188554/ENSG00000143867/ENSG00000164920/ENSG00000173868/ENSG00000120899/ENSG00000105894/ENSG00000183023/ENSG00000119699/ENSG00000183160/ENSG00000130529/ENSG00000122691/ENSG00000169884	23
GO:0050773	regulation of dendrite development	28/2947	110/20870	0.00114947	0.0210827	0.0175996	ENSG00000135298/ENSG00000101144/ENSG00000257923/ENSG00000162374/ENSG00000175866/ENSG00000198908/ENSG00000058404/ENSG00000118200/ENSG00000110888/ENSG00000080644/ENSG00000164796/ENSG00000044090/ENSG00000113758/ENSG00000136279/ENSG00000187323/ENSG00000103319/ENSG00000158301/ENSG00000203908/ENSG00000137261/ENSG00000171798/ENSG00000061337/ENSG00000100968/ENSG00000112333/ENSG00000124507/ENSG00000077264…	28
GO:0010171	body morphogenesis	15/2947	46/20870	0.00115045	0.0210827	0.0175996	ENSG00000167522/ENSG00000105880/ENSG00000198807/ENSG00000150347/ENSG00000163539/ENSG00000163132/ENSG00000182220/ENSG00000108821/ENSG00000121005/ENSG00000147257/ENSG00000087245/ENSG00000134853/ENSG00000144824/ENSG00000137868/ENSG00000119699	15
GO:0009895	negative regulation of catabolic process	74/2947	371/20870	0.00117204	0.0214167	0.0178784	ENSG00000129993/ENSG00000164916/ENSG00000178301/ENSG00000162374/ENSG00000141568/ENSG00000068024/ENSG00000159217/ENSG00000125337/ENSG00000166949/ENSG00000232810/ENSG00000076555/ENSG00000120907/ENSG00000104081/ENSG00000152430/ENSG00000130826/ENSG00000147677/ENSG00000114867/ENSG00000139160/ENSG00000149557/ENSG00000196924/ENSG00000102081/ENSG00000140564/ENSG00000136574/ENSG00000168621/ENSG00000161509…	74
GO:0042472	inner ear morphogenesis	27/2947	105/20870	0.00118477	0.0215256	0.0179693	ENSG00000105880/ENSG00000115507/ENSG00000117707/ENSG00000066468/ENSG00000158055/ENSG00000137203/ENSG00000114251/ENSG00000184254/ENSG00000060718/ENSG00000164932/ENSG00000006377/ENSG00000104313/ENSG00000070193/ENSG00000176165/ENSG00000164930/ENSG00000179348/ENSG00000188620/ENSG00000105991/ENSG00000105707/ENSG00000053918/ENSG00000139263/ENSG00000065320/ENSG00000125618/ENSG00000204385/ENSG00000142168…	27
GO:0110149	regulation of biomineralization	27/2947	105/20870	0.00118477	0.0215256	0.0179693	ENSG00000101144/ENSG00000166949/ENSG00000137203/ENSG00000183337/ENSG00000125378/ENSG00000138696/ENSG00000142871/ENSG00000162733/ENSG00000152592/ENSG00000135547/ENSG00000187608/ENSG00000133116/ENSG00000081189/ENSG00000188554/ENSG00000164867/ENSG00000143867/ENSG00000164920/ENSG00000173868/ENSG00000120899/ENSG00000105894/ENSG00000067900/ENSG00000183023/ENSG00000119699/ENSG00000183160/ENSG00000130529…	27
GO:0035282	segmentation	26/2947	100/20870	0.00121633	0.022036	0.0183954	ENSG00000103241/ENSG00000118257/ENSG00000145423/ENSG00000166949/ENSG00000114251/ENSG00000184937/ENSG00000136754/ENSG00000128918/ENSG00000168283/ENSG00000125378/ENSG00000090932/ENSG00000054598/ENSG00000166225/ENSG00000105996/ENSG00000177508/ENSG00000106003/ENSG00000184634/ENSG00000005102/ENSG00000106511/ENSG00000171843/ENSG00000143867/ENSG00000179598/ENSG00000168214/ENSG00000135111/ENSG00000164458…	26
GO:1904375	regulation of protein localization to cell periphery	33/2947	137/20870	0.00123519	0.0222894	0.018607	ENSG00000169083/ENSG00000073921/ENSG00000232810/ENSG00000006740/ENSG00000130762/ENSG00000166997/ENSG00000153071/ENSG00000175497/ENSG00000159023/ENSG00000079819/ENSG00000142627/ENSG00000044524/ENSG00000121853/ENSG00000164850/ENSG00000174775/ENSG00000124313/ENSG00000123384/ENSG00000170262/ENSG00000145506/ENSG00000137497/ENSG00000133961/ENSG00000145675/ENSG00000027075/ENSG00000067606/ENSG00000169410…	33
GO:0016055	Wnt signaling pathway	90/2947	468/20870	0.00123733	0.0222894	0.018607	ENSG00000167693/ENSG00000105880/ENSG00000110092/ENSG00000066468/ENSG00000158055/ENSG00000072518/ENSG00000145423/ENSG00000166949/ENSG00000137573/ENSG00000101849/ENSG00000144560/ENSG00000114251/ENSG00000198796/ENSG00000184675/ENSG00000165566/ENSG00000135299/ENSG00000134982/ENSG00000142632/ENSG00000182220/ENSG00000116128/ENSG00000012822/ENSG00000110888/ENSG00000015133/ENSG00000272398/ENSG00000100888…	90
GO:0051952	regulation of amine transport	25/2947	95/20870	0.00124304	0.0223291	0.0186401	ENSG00000102468/ENSG00000183044/ENSG00000135744/ENSG00000101200/ENSG00000187094/ENSG00000080644/ENSG00000147571/ENSG00000107562/ENSG00000047579/ENSG00000078579/ENSG00000168621/ENSG00000121853/ENSG00000135312/ENSG00000174697/ENSG00000101405/ENSG00000116741/ENSG00000117152/ENSG00000149150/ENSG00000167703/ENSG00000157103/ENSG00000067715/ENSG00000204176/ENSG00000213023/ENSG00000134207/ENSG00000149043	25
GO:1904888	cranial skeletal system development	20/2947	70/20870	0.00125354	0.0224543	0.0187446	ENSG00000066468/ENSG00000166949/ENSG00000092607/ENSG00000137203/ENSG00000125378/ENSG00000138180/ENSG00000106571/ENSG00000083307/ENSG00000105991/ENSG00000105996/ENSG00000187535/ENSG00000117595/ENSG00000184634/ENSG00000070614/ENSG00000134853/ENSG00000121039/ENSG00000124813/ENSG00000092969/ENSG00000119699/ENSG00000122691	20
GO:0110151	positive regulation of biomineralization	16/2947	51/20870	0.0012727	0.0226312	0.0188922	ENSG00000101144/ENSG00000166949/ENSG00000137203/ENSG00000125378/ENSG00000138696/ENSG00000142871/ENSG00000187608/ENSG00000133116/ENSG00000081189/ENSG00000143867/ENSG00000164920/ENSG00000105894/ENSG00000183023/ENSG00000119699/ENSG00000183160/ENSG00000169884	16
GO:2001236	regulation of extrinsic apoptotic signaling pathway	39/2947	170/20870	0.00128126	0.0226312	0.0188922	ENSG00000169083/ENSG00000145423/ENSG00000232810/ENSG00000135744/ENSG00000125378/ENSG00000138696/ENSG00000003402/ENSG00000006210/ENSG00000160570/ENSG00000155792/ENSG00000104313/ENSG00000158161/ENSG00000112319/ENSG00000158234/ENSG00000135472/ENSG00000070193/ENSG00000168621/ENSG00000164850/ENSG00000019991/ENSG00000164104/ENSG00000204389/ENSG00000204388/ENSG00000068001/ENSG00000017427/ENSG00000122641…	39
GO:0021772	olfactory bulb development	11/2947	29/20870	0.00129272	0.0226312	0.0188922	ENSG00000180613/ENSG00000105880/ENSG00000114251/ENSG00000004848/ENSG00000178568/ENSG00000128610/ENSG00000112333/ENSG00000169855/ENSG00000185008/ENSG00000103449/ENSG00000164853	11
GO:0060325	face morphogenesis	11/2947	29/20870	0.00129272	0.0226312	0.0188922	ENSG00000167522/ENSG00000105880/ENSG00000198807/ENSG00000150347/ENSG00000163132/ENSG00000108821/ENSG00000121005/ENSG00000087245/ENSG00000134853/ENSG00000137868/ENSG00000119699	11
GO:1903779	regulation of cardiac conduction	11/2947	29/20870	0.00129272	0.0226312	0.0188922	ENSG00000089225/ENSG00000145362/ENSG00000135744/ENSG00000145244/ENSG00000265107/ENSG00000183153/ENSG00000183072/ENSG00000183023/ENSG00000118160/ENSG00000144935/ENSG00000130529	11
GO:0003215	cardiac right ventricle morphogenesis	9/2947	21/20870	0.00129545	0.0226312	0.0188922	ENSG00000160973/ENSG00000136574/ENSG00000164107/ENSG00000135547/ENSG00000016082/ENSG00000183072/ENSG00000124766/ENSG00000092969/ENSG00000169946	9
GO:0051895	negative regulation of focal adhesion assembly	9/2947	21/20870	0.00129545	0.0226312	0.0188922	ENSG00000047648/ENSG00000163539/ENSG00000110880/ENSG00000164741/ENSG00000112679/ENSG00000119185/ENSG00000123384/ENSG00000144824/ENSG00000179051	9
GO:0150118	negative regulation of cell-substrate junction organization	9/2947	21/20870	0.00129545	0.0226312	0.0188922	ENSG00000047648/ENSG00000163539/ENSG00000110880/ENSG00000164741/ENSG00000112679/ENSG00000119185/ENSG00000123384/ENSG00000144824/ENSG00000179051	9
GO:2000738	positive regulation of stem cell differentiation	9/2947	21/20870	0.00129545	0.0226312	0.0188922	ENSG00000089225/ENSG00000134532/ENSG00000054598/ENSG00000136574/ENSG00000183072/ENSG00000105894/ENSG00000110693/ENSG00000125878/ENSG00000092969	9
GO:0007431	salivary gland development	14/2947	42/20870	0.00130898	0.0227427	0.0189853	ENSG00000101144/ENSG00000066468/ENSG00000101680/ENSG00000007372/ENSG00000232810/ENSG00000158813/ENSG00000070193/ENSG00000019991/ENSG00000147862/ENSG00000074527/ENSG00000004399/ENSG00000092969/ENSG00000119699/ENSG00000128791	14
GO:1901889	negative regulation of cell junction assembly	14/2947	42/20870	0.00130898	0.0227427	0.0189853	ENSG00000047648/ENSG00000163539/ENSG00000232810/ENSG00000114251/ENSG00000110880/ENSG00000164741/ENSG00000112679/ENSG00000135333/ENSG00000119185/ENSG00000123384/ENSG00000144824/ENSG00000179051/ENSG00000185008/ENSG00000067900	14
GO:0003181	atrioventricular valve morphogenesis	10/2947	25/20870	0.00132952	0.0230104	0.0192088	ENSG00000089225/ENSG00000142871/ENSG00000136574/ENSG00000135547/ENSG00000163909/ENSG00000135679/ENSG00000124766/ENSG00000092969/ENSG00000122691/ENSG00000179588	10
GO:0098739	import across plasma membrane	42/2947	187/20870	0.00133163	0.0230104	0.0192088	ENSG00000186009/ENSG00000092068/ENSG00000151726/ENSG00000135744/ENSG00000143153/ENSG00000069849/ENSG00000152822/ENSG00000121361/ENSG00000053918/ENSG00000207713/ENSG00000204442/ENSG00000130054/ENSG00000116741/ENSG00000117152/ENSG00000124067/ENSG00000221955/ENSG00000088386/ENSG00000139370/ENSG00000147100/ENSG00000110436/ENSG00000079215/ENSG00000105281/ENSG00000147804/ENSG00000138821/ENSG00000168003…	42
GO:0055123	digestive system development	36/2947	154/20870	0.00135635	0.0233139	0.0194622	ENSG00000052850/ENSG00000066468/ENSG00000103241/ENSG00000057657/ENSG00000145423/ENSG00000168779/ENSG00000166949/ENSG00000176887/ENSG00000232810/ENSG00000114251/ENSG00000128918/ENSG00000125378/ENSG00000134057/ENSG00000100888/ENSG00000173406/ENSG00000070193/ENSG00000176678/ENSG00000136574/ENSG00000106571/ENSG00000136630/ENSG00000106004/ENSG00000128714/ENSG00000167244/ENSG00000053918/ENSG00000109705…	36
GO:0071383	cellular response to steroid hormone stimulus	48/2947	221/20870	0.00135652	0.0233139	0.0194622	ENSG00000091831/ENSG00000196482/ENSG00000196498/ENSG00000169083/ENSG00000101144/ENSG00000114861/ENSG00000048540/ENSG00000204231/ENSG00000023839/ENSG00000140526/ENSG00000156709/ENSG00000240583/ENSG00000168283/ENSG00000125378/ENSG00000012822/ENSG00000132906/ENSG00000003402/ENSG00000111596/ENSG00000147571/ENSG00000125831/ENSG00000172817/ENSG00000153071/ENSG00000108654/ENSG00000078401/ENSG00000119715…	48
GO:0001755	neural crest cell migration	17/2947	56/20870	0.00136839	0.0234544	0.0195795	ENSG00000101144/ENSG00000118257/ENSG00000164093/ENSG00000012171/ENSG00000197043/ENSG00000125378/ENSG00000110880/ENSG00000090776/ENSG00000178568/ENSG00000168621/ENSG00000164107/ENSG00000016082/ENSG00000157927/ENSG00000170381/ENSG00000010319/ENSG00000128602/ENSG00000122691	17
GO:2001022	positive regulation of response to DNA damage stimulus	27/2947	106/20870	0.00137949	0.023563	0.0196701	ENSG00000163132/ENSG00000163961/ENSG00000166313/ENSG00000149311/ENSG00000105393/ENSG00000108654/ENSG00000104313/ENSG00000158161/ENSG00000112319/ENSG00000181544/ENSG00000070193/ENSG00000102081/ENSG00000149948/ENSG00000189403/ENSG00000203908/ENSG00000110066/ENSG00000155229/ENSG00000136997/ENSG00000170485/ENSG00000169189/ENSG00000132646/ENSG00000153246/ENSG00000136603/ENSG00000119906/ENSG00000198369…	27
GO:0048511	rhythmic process	63/2947	308/20870	0.00138214	0.023563	0.0196701	ENSG00000091831/ENSG00000057593/ENSG00000196498/ENSG00000117707/ENSG00000069667/ENSG00000140836/ENSG00000164742/ENSG00000101126/ENSG00000101444/ENSG00000029153/ENSG00000179774/ENSG00000138696/ENSG00000159208/ENSG00000095794/ENSG00000147571/ENSG00000141551/ENSG00000213923/ENSG00000139842/ENSG00000108654/ENSG00000197361/ENSG00000198380/ENSG00000170961/ENSG00000116478/ENSG00000044574/ENSG00000086758…	63
GO:0090287	regulation of cellular response to growth factor stimulus	65/2947	320/20870	0.00140868	0.0239513	0.0199942	ENSG00000144730/ENSG00000163132/ENSG00000182175/ENSG00000145423/ENSG00000166949/ENSG00000176887/ENSG00000137573/ENSG00000131634/ENSG00000114251/ENSG00000151388/ENSG00000135744/ENSG00000171388/ENSG00000125378/ENSG00000147044/ENSG00000142871/ENSG00000179776/ENSG00000129757/ENSG00000003402/ENSG00000090539/ENSG00000125931/ENSG00000153071/ENSG00000011465/ENSG00000144355/ENSG00000079805/ENSG00000138080…	65
GO:0198738	cell-cell signaling by wnt	90/2947	470/20870	0.0014145	0.0239862	0.0200234	ENSG00000167693/ENSG00000105880/ENSG00000110092/ENSG00000066468/ENSG00000158055/ENSG00000072518/ENSG00000145423/ENSG00000166949/ENSG00000137573/ENSG00000101849/ENSG00000144560/ENSG00000114251/ENSG00000198796/ENSG00000184675/ENSG00000165566/ENSG00000135299/ENSG00000134982/ENSG00000142632/ENSG00000182220/ENSG00000116128/ENSG00000012822/ENSG00000110888/ENSG00000015133/ENSG00000272398/ENSG00000100888…	90
GO:0070507	regulation of microtubule cytoskeleton organization	39/2947	171/20870	0.00143794	0.0241902	0.0201937	ENSG00000141556/ENSG00000102606/ENSG00000163635/ENSG00000151746/ENSG00000163539/ENSG00000197102/ENSG00000072518/ENSG00000100503/ENSG00000134982/ENSG00000166780/ENSG00000130559/ENSG00000118200/ENSG00000154429/ENSG00000179776/ENSG00000111276/ENSG00000182504/ENSG00000255112/ENSG00000086065/ENSG00000130779/ENSG00000125746/ENSG00000044524/ENSG00000182511/ENSG00000129682/ENSG00000204389/ENSG00000204388…	39
GO:0071772	response to BMP	39/2947	171/20870	0.00143794	0.0241902	0.0201937	ENSG00000105880/ENSG00000101144/ENSG00000163132/ENSG00000182175/ENSG00000145423/ENSG00000166949/ENSG00000176887/ENSG00000137573/ENSG00000114251/ENSG00000151388/ENSG00000125378/ENSG00000138696/ENSG00000142871/ENSG00000179776/ENSG00000090539/ENSG00000108654/ENSG00000144355/ENSG00000136574/ENSG00000130513/ENSG00000263761/ENSG00000143869/ENSG00000147257/ENSG00000163909/ENSG00000199075/ENSG00000158747…	39
GO:0071773	cellular response to BMP stimulus	39/2947	171/20870	0.00143794	0.0241902	0.0201937	ENSG00000105880/ENSG00000101144/ENSG00000163132/ENSG00000182175/ENSG00000145423/ENSG00000166949/ENSG00000176887/ENSG00000137573/ENSG00000114251/ENSG00000151388/ENSG00000125378/ENSG00000138696/ENSG00000142871/ENSG00000179776/ENSG00000090539/ENSG00000108654/ENSG00000144355/ENSG00000136574/ENSG00000130513/ENSG00000263761/ENSG00000143869/ENSG00000147257/ENSG00000163909/ENSG00000199075/ENSG00000158747…	39
GO:0071478	cellular response to radiation	44/2947	199/20870	0.00144854	0.0243041	0.0202888	ENSG00000118971/ENSG00000145423/ENSG00000148671/ENSG00000240583/ENSG00000149311/ENSG00000030110/ENSG00000104081/ENSG00000132906/ENSG00000172428/ENSG00000158290/ENSG00000051523/ENSG00000079805/ENSG00000114346/ENSG00000126767/ENSG00000102081/ENSG00000116717/ENSG00000114124/ENSG00000272047/ENSG00000149948/ENSG00000174775/ENSG00000044574/ENSG00000114378/ENSG00000068001/ENSG00000135679/ENSG00000166482…	44
GO:0034644	cellular response to UV	25/2947	96/20870	0.00145914	0.0243535	0.02033	ENSG00000240583/ENSG00000030110/ENSG00000104081/ENSG00000132906/ENSG00000172428/ENSG00000158290/ENSG00000102081/ENSG00000114378/ENSG00000068001/ENSG00000135679/ENSG00000166482/ENSG00000087245/ENSG00000136997/ENSG00000102921/ENSG00000100968/ENSG00000185115/ENSG00000132646/ENSG00000145675/ENSG00000062822/ENSG00000077514/ENSG00000171497/ENSG00000105894/ENSG00000147133/ENSG00000164938/ENSG00000213689	25
GO:0097581	lamellipodium organization	25/2947	96/20870	0.00145914	0.0243535	0.02033	ENSG00000163995/ENSG00000102606/ENSG00000068024/ENSG00000132613/ENSG00000136754/ENSG00000138443/ENSG00000099204/ENSG00000136002/ENSG00000129675/ENSG00000165240/ENSG00000115355/ENSG00000172725/ENSG00000110880/ENSG00000079805/ENSG00000142627/ENSG00000075618/ENSG00000071051/ENSG00000197822/ENSG00000188677/ENSG00000145675/ENSG00000173156/ENSG00000182957/ENSG00000101222/ENSG00000158195/ENSG00000125084	25
GO:0071560	cellular response to transforming growth factor beta stimulus	55/2947	262/20870	0.00146528	0.0243919	0.020362	ENSG00000066468/ENSG00000144730/ENSG00000166949/ENSG00000176887/ENSG00000134532/ENSG00000114251/ENSG00000179776/ENSG00000129757/ENSG00000003402/ENSG00000125931/ENSG00000163347/ENSG00000163815/ENSG00000108821/ENSG00000164692/ENSG00000134871/ENSG00000153071/ENSG00000144355/ENSG00000079805/ENSG00000112679/ENSG00000078401/ENSG00000138080/ENSG00000160973/ENSG00000140564/ENSG00000130513/ENSG00000204389…	55
GO:0045616	regulation of keratinocyte differentiation	13/2947	38/20870	0.00147406	0.0244741	0.0204307	ENSG00000179593/ENSG00000175832/ENSG00000054598/ENSG00000083307/ENSG00000162891/ENSG00000099284/ENSG00000243678/ENSG00000137497/ENSG00000027075/ENSG00000067900/ENSG00000124193/ENSG00000128016/ENSG00000185650	13
GO:0060997	dendritic spine morphogenesis	19/2947	66/20870	0.00148799	0.024641	0.02057	ENSG00000138443/ENSG00000006740/ENSG00000175866/ENSG00000198908/ENSG00000058404/ENSG00000110888/ENSG00000113758/ENSG00000136279/ENSG00000132535/ENSG00000103319/ENSG00000154928/ENSG00000158301/ENSG00000088899/ENSG00000169760/ENSG00000077264/ENSG00000139220/ENSG00000158528/ENSG00000161681/ENSG00000277363	19
GO:0048167	regulation of synaptic plasticity	48/2947	222/20870	0.00149826	0.0247466	0.0206582	ENSG00000196639/ENSG00000164742/ENSG00000135744/ENSG00000175866/ENSG00000104327/ENSG00000058404/ENSG00000107864/ENSG00000145920/ENSG00000147571/ENSG00000006210/ENSG00000113758/ENSG00000132535/ENSG00000148730/ENSG00000082805/ENSG00000102466/ENSG00000102081/ENSG00000155511/ENSG00000152208/ENSG00000164418/ENSG00000161509/ENSG00000174775/ENSG00000092051/ENSG00000133703/ENSG00000061337/ENSG00000169057…	48
GO:0060193	positive regulation of lipase activity	20/2947	71/20870	0.00151712	0.0249931	0.020864	ENSG00000091831/ENSG00000047648/ENSG00000066468/ENSG00000102468/ENSG00000143322/ENSG00000120907/ENSG00000135744/ENSG00000120805/ENSG00000142871/ENSG00000151617/ENSG00000068078/ENSG00000174775/ENSG00000064547/ENSG00000171631/ENSG00000134853/ENSG00000167085/ENSG00000170890/ENSG00000067606/ENSG00000125910/ENSG00000074966	20
GO:0050795	regulation of behavior	21/2947	76/20870	0.00152943	0.0250147	0.020882	ENSG00000068024/ENSG00000140836/ENSG00000113369/ENSG00000187094/ENSG00000147571/ENSG00000132535/ENSG00000121853/ENSG00000105991/ENSG00000135312/ENSG00000179546/ENSG00000116678/ENSG00000081189/ENSG00000134640/ENSG00000169760/ENSG00000170485/ENSG00000049246/ENSG00000107317/ENSG00000188710/ENSG00000118473/ENSG00000168610/ENSG00000137868	21
GO:0008298	intracellular mRNA localization	7/2947	14/20870	0.00153023	0.0250147	0.020882	ENSG00000151746/ENSG00000171824/ENSG00000130713/ENSG00000165630/ENSG00000128016/ENSG00000185650/ENSG00000161642	7
GO:0051956	negative regulation of amino acid transport	7/2947	14/20870	0.00153023	0.0250147	0.020882	ENSG00000183044/ENSG00000135312/ENSG00000174697/ENSG00000116741/ENSG00000117152/ENSG00000149150/ENSG00000167703	7
GO:1902903	regulation of supramolecular fiber organization	82/2947	423/20870	0.00156874	0.0255785	0.0213526	ENSG00000141556/ENSG00000117707/ENSG00000047648/ENSG00000102606/ENSG00000163635/ENSG00000042493/ENSG00000163539/ENSG00000064042/ENSG00000106683/ENSG00000100503/ENSG00000166949/ENSG00000204713/ENSG00000138443/ENSG00000170776/ENSG00000134982/ENSG00000186635/ENSG00000146376/ENSG00000111229/ENSG00000088280/ENSG00000175866/ENSG00000128298/ENSG00000166780/ENSG00000130559/ENSG00000118200/ENSG00000115355…	82
GO:0050890	cognition	71/2947	357/20870	0.00157535	0.0256206	0.0213878	ENSG00000135298/ENSG00000176697/ENSG00000118971/ENSG00000085788/ENSG00000162374/ENSG00000163064/ENSG00000196639/ENSG00000102468/ENSG00000179915/ENSG00000073921/ENSG00000232810/ENSG00000164742/ENSG00000138031/ENSG00000101126/ENSG00000155966/ENSG00000135744/ENSG00000198908/ENSG00000104327/ENSG00000159231/ENSG00000187094/ENSG00000168539/ENSG00000107864/ENSG00000147571/ENSG00000145708/ENSG00000183117…	71
GO:0048593	camera-type eye morphogenesis	33/2947	139/20870	0.00160003	0.0256804	0.0214377	ENSG00000146555/ENSG00000117707/ENSG00000101144/ENSG00000197406/ENSG00000143995/ENSG00000129535/ENSG00000007372/ENSG00000164093/ENSG00000204227/ENSG00000176887/ENSG00000218336/ENSG00000137203/ENSG00000114251/ENSG00000138443/ENSG00000184254/ENSG00000030110/ENSG00000137936/ENSG00000125378/ENSG00000104327/ENSG00000171587/ENSG00000142627/ENSG00000154928/ENSG00000166225/ENSG00000106571/ENSG00000205581…	33
GO:0021545	cranial nerve development	16/2947	52/20870	0.00160074	0.0256804	0.0214377	ENSG00000105997/ENSG00000120093/ENSG00000118257/ENSG00000137203/ENSG00000179774/ENSG00000154928/ENSG00000106571/ENSG00000105991/ENSG00000173917/ENSG00000016082/ENSG00000166833/ENSG00000198400/ENSG00000103449/ENSG00000079215/ENSG00000110719/ENSG00000171202	16
GO:0060043	regulation of cardiac muscle cell proliferation	16/2947	52/20870	0.00160074	0.0256804	0.0214377	ENSG00000089225/ENSG00000078900/ENSG00000066468/ENSG00000143995/ENSG00000144560/ENSG00000134057/ENSG00000178568/ENSG00000078579/ENSG00000135547/ENSG00000082482/ENSG00000081189/ENSG00000207752/ENSG00000138207/ENSG00000168214/ENSG00000159216/ENSG00000169946	16
GO:0060421	positive regulation of heart growth	16/2947	52/20870	0.00160074	0.0256804	0.0214377	ENSG00000117707/ENSG00000089225/ENSG00000066468/ENSG00000184937/ENSG00000076555/ENSG00000134057/ENSG00000198563/ENSG00000078401/ENSG00000178568/ENSG00000135547/ENSG00000017427/ENSG00000081189/ENSG00000207752/ENSG00000129484/ENSG00000168214/ENSG00000169946	16
GO:0061001	regulation of dendritic spine morphogenesis	16/2947	52/20870	0.00160074	0.0256804	0.0214377	ENSG00000138443/ENSG00000006740/ENSG00000175866/ENSG00000198908/ENSG00000058404/ENSG00000110888/ENSG00000113758/ENSG00000136279/ENSG00000103319/ENSG00000158301/ENSG00000088899/ENSG00000169760/ENSG00000077264/ENSG00000139220/ENSG00000158528/ENSG00000277363	16
GO:0003012	muscle system process	91/2947	478/20870	0.00160326	0.0256804	0.0214377	ENSG00000113448/ENSG00000107796/ENSG00000145362/ENSG00000068024/ENSG00000102468/ENSG00000166949/ENSG00000137573/ENSG00000183044/ENSG00000120907/ENSG00000135744/ENSG00000170776/ENSG00000197043/ENSG00000166313/ENSG00000163697/ENSG00000143153/ENSG00000168398/ENSG00000165995/ENSG00000122786/ENSG00000058404/ENSG00000113163/ENSG00000003402/ENSG00000133019/ENSG00000080644/ENSG00000130176/ENSG00000051523…	91
GO:0060840	artery development	26/2947	102/20870	0.00165625	0.0264626	0.0220907	ENSG00000117707/ENSG00000163638/ENSG00000103241/ENSG00000057657/ENSG00000049192/ENSG00000125378/ENSG00000128917/ENSG00000104313/ENSG00000054598/ENSG00000160973/ENSG00000265107/ENSG00000106571/ENSG00000164107/ENSG00000135547/ENSG00000105991/ENSG00000174697/ENSG00000123384/ENSG00000070614/ENSG00000186642/ENSG00000004399/ENSG00000168214/ENSG00000169855/ENSG00000185008/ENSG00000124766/ENSG00000137868…	26
GO:0032330	regulation of chondrocyte differentiation	17/2947	57/20870	0.00169721	0.0269815	0.0225238	ENSG00000168779/ENSG00000166949/ENSG00000134532/ENSG00000151388/ENSG00000125378/ENSG00000138696/ENSG00000106571/ENSG00000150051/ENSG00000272573/ENSG00000109705/ENSG00000077092/ENSG00000124813/ENSG00000019549/ENSG00000110693/ENSG00000104447/ENSG00000109906/ENSG00000165804	17
GO:0035176	social behavior	17/2947	57/20870	0.00169721	0.0269815	0.0225238	ENSG00000163064/ENSG00000179915/ENSG00000141564/ENSG00000101200/ENSG00000100888/ENSG00000132535/ENSG00000148730/ENSG00000053918/ENSG00000169057/ENSG00000146938/ENSG00000112333/ENSG00000110076/ENSG00000101405/ENSG00000165186/ENSG00000161681/ENSG00000162105/ENSG00000197969	17
GO:0051147	regulation of muscle cell differentiation	38/2947	167/20870	0.00171501	0.0271964	0.0227033	ENSG00000061455/ENSG00000117707/ENSG00000068650/ENSG00000176697/ENSG00000066468/ENSG00000068024/ENSG00000163132/ENSG00000168779/ENSG00000125378/ENSG00000198563/ENSG00000078401/ENSG00000102678/ENSG00000166225/ENSG00000160211/ENSG00000164850/ENSG00000135547/ENSG00000171476/ENSG00000017427/ENSG00000167244/ENSG00000135679/ENSG00000169057/ENSG00000118579/ENSG00000081189/ENSG00000207752/ENSG00000199075…	38
GO:0031644	regulation of nervous system process	36/2947	156/20870	0.00172501	0.0272192	0.0227223	ENSG00000179915/ENSG00000183044/ENSG00000135744/ENSG00000101200/ENSG00000175866/ENSG00000183092/ENSG00000187094/ENSG00000100697/ENSG00000132535/ENSG00000198010/ENSG00000080845/ENSG00000078401/ENSG00000181104/ENSG00000114279/ENSG00000102081/ENSG00000121853/ENSG00000152822/ENSG00000019991/ENSG00000152413/ENSG00000087053/ENSG00000134640/ENSG00000169760/ENSG00000169992/ENSG00000146938/ENSG00000164867…	36
GO:0043524	negative regulation of neuron apoptotic process	36/2947	156/20870	0.00172501	0.0272192	0.0227223	ENSG00000176697/ENSG00000163064/ENSG00000090861/ENSG00000101126/ENSG00000154188/ENSG00000198908/ENSG00000125931/ENSG00000242689/ENSG00000006210/ENSG00000144355/ENSG00000181104/ENSG00000135472/ENSG00000078579/ENSG00000145864/ENSG00000168621/ENSG00000158301/ENSG00000116478/ENSG00000174775/ENSG00000016082/ENSG00000133703/ENSG00000123384/ENSG00000169057/ENSG00000081189/ENSG00000134640/ENSG00000277586…	36
GO:0003128	heart field specification	8/2947	18/20870	0.00182193	0.0284183	0.0237233	ENSG00000114251/ENSG00000125378/ENSG00000160973/ENSG00000016082/ENSG00000081189/ENSG00000168214/ENSG00000169855/ENSG00000185008	8
GO:0060008	Sertoli cell differentiation	8/2947	18/20870	0.00182193	0.0284183	0.0237233	ENSG00000136943/ENSG00000137090/ENSG00000196924/ENSG00000133835/ENSG00000169297/ENSG00000198400/ENSG00000131759/ENSG00000118526	8
GO:0060973	cell migration involved in heart development	8/2947	18/20870	0.00182193	0.0284183	0.0237233	ENSG00000089225/ENSG00000101144/ENSG00000164093/ENSG00000125378/ENSG00000164107/ENSG00000103034/ENSG00000019549/ENSG00000122691	8
GO:0000281	mitotic cytokinesis	20/2947	72/20870	0.00182635	0.0284183	0.0237233	ENSG00000151150/ENSG00000122966/ENSG00000134982/ENSG00000138180/ENSG00000255112/ENSG00000086065/ENSG00000176108/ENSG00000044090/ENSG00000114346/ENSG00000183690/ENSG00000137807/ENSG00000090889/ENSG00000158411/ENSG00000161800/ENSG00000067900/ENSG00000125354/ENSG00000173548/ENSG00000115306/ENSG00000124356/ENSG00000072121	20
GO:0030032	lamellipodium assembly	21/2947	77/20870	0.00182782	0.0284183	0.0237233	ENSG00000163995/ENSG00000102606/ENSG00000068024/ENSG00000138443/ENSG00000099204/ENSG00000136002/ENSG00000129675/ENSG00000165240/ENSG00000115355/ENSG00000079805/ENSG00000142627/ENSG00000075618/ENSG00000071051/ENSG00000197822/ENSG00000188677/ENSG00000145675/ENSG00000173156/ENSG00000182957/ENSG00000101222/ENSG00000158195/ENSG00000125084	21
GO:0072078	nephron tubule morphogenesis	21/2947	77/20870	0.00182782	0.0284183	0.0237233	ENSG00000184937/ENSG00000145536/ENSG00000135744/ENSG00000125378/ENSG00000125931/ENSG00000104313/ENSG00000113578/ENSG00000248905/ENSG00000168621/ENSG00000106571/ENSG00000147257/ENSG00000260027/ENSG00000177508/ENSG00000136997/ENSG00000143867/ENSG00000125618/ENSG00000103449/ENSG00000128602/ENSG00000118526/ENSG00000126562/ENSG00000125084	21
GO:0019395	fatty acid oxidation	27/2947	108/20870	0.00185291	0.0287382	0.0239903	ENSG00000087008/ENSG00000106617/ENSG00000173208/ENSG00000076555/ENSG00000122971/ENSG00000072778/ENSG00000101473/ENSG00000168306/ENSG00000197894/ENSG00000006831/ENSG00000108839/ENSG00000110090/ENSG00000161544/ENSG00000019186/ENSG00000140374/ENSG00000139160/ENSG00000121769/ENSG00000131373/ENSG00000072506/ENSG00000133835/ENSG00000105135/ENSG00000169047/ENSG00000174697/ENSG00000164751/ENSG00000112033…	27
GO:1902473	regulation of protein localization to synapse	10/2947	26/20870	0.00188962	0.0292363	0.0244061	ENSG00000114251/ENSG00000006740/ENSG00000139182/ENSG00000121853/ENSG00000174775/ENSG00000124313/ENSG00000169760/ENSG00000169992/ENSG00000067606/ENSG00000161835	10
GO:0021542	dentate gyrus development	9/2947	22/20870	0.00191978	0.0293962	0.0245396	ENSG00000117707/ENSG00000170370/ENSG00000153266/ENSG00000162761/ENSG00000162992/ENSG00000164600/ENSG00000112333/ENSG00000128602/ENSG00000144868	9
GO:0051151	negative regulation of smooth muscle cell differentiation	9/2947	22/20870	0.00191978	0.0293962	0.0245396	ENSG00000061455/ENSG00000102678/ENSG00000135547/ENSG00000169057/ENSG00000118579/ENSG00000199075/ENSG00000131196/ENSG00000101096/ENSG00000072736	9
GO:0003139	secondary heart field specification	6/2947	11/20870	0.00192307	0.0293962	0.0245396	ENSG00000114251/ENSG00000125378/ENSG00000160973/ENSG00000016082/ENSG00000081189/ENSG00000168214	6
GO:0099566	regulation of postsynaptic cytosolic calcium ion concentration	6/2947	11/20870	0.00192307	0.0293962	0.0245396	ENSG00000114251/ENSG00000104327/ENSG00000155511/ENSG00000152822/ENSG00000183023/ENSG00000118160	6
GO:1902337	regulation of apoptotic process involved in morphogenesis	6/2947	11/20870	0.00192307	0.0293962	0.0245396	ENSG00000101144/ENSG00000054598/ENSG00000125618/ENSG00000092969/ENSG00000067182/ENSG00000028137	6
GO:0021872	forebrain generation of neurons	16/2947	53/20870	0.00199687	0.0303057	0.0252989	ENSG00000117707/ENSG00000066468/ENSG00000118257/ENSG00000007372/ENSG00000119042/ENSG00000165240/ENSG00000144355/ENSG00000153266/ENSG00000176165/ENSG00000179348/ENSG00000106571/ENSG00000122641/ENSG00000106852/ENSG00000112333/ENSG00000136535/ENSG00000170315	16
GO:0035272	exocrine system development	16/2947	53/20870	0.00199687	0.0303057	0.0252989	ENSG00000101144/ENSG00000066468/ENSG00000101680/ENSG00000007372/ENSG00000232810/ENSG00000158813/ENSG00000070193/ENSG00000054598/ENSG00000019991/ENSG00000167244/ENSG00000147862/ENSG00000074527/ENSG00000004399/ENSG00000092969/ENSG00000119699/ENSG00000128791	16
GO:0046677	response to antibiotic	16/2947	53/20870	0.00199687	0.0303057	0.0252989	ENSG00000002726/ENSG00000131471/ENSG00000165240/ENSG00000132906/ENSG00000111276/ENSG00000110090/ENSG00000044574/ENSG00000114378/ENSG00000068001/ENSG00000162434/ENSG00000136504/ENSG00000135679/ENSG00000081189/ENSG00000125691/ENSG00000079215/ENSG00000142168	16
GO:0034440	lipid oxidation	28/2947	114/20870	0.00204735	0.0309979	0.0258767	ENSG00000087008/ENSG00000106617/ENSG00000173208/ENSG00000076555/ENSG00000122971/ENSG00000072778/ENSG00000101473/ENSG00000168306/ENSG00000197894/ENSG00000006831/ENSG00000108839/ENSG00000179593/ENSG00000110090/ENSG00000161544/ENSG00000019186/ENSG00000140374/ENSG00000139160/ENSG00000121769/ENSG00000131373/ENSG00000072506/ENSG00000133835/ENSG00000105135/ENSG00000169047/ENSG00000174697/ENSG00000164751…	28
GO:0007178	transmembrane receptor protein serine/threonine kinase signaling pathway	74/2947	379/20870	0.00211949	0.0320139	0.0267249	ENSG00000105880/ENSG00000101144/ENSG00000144730/ENSG00000163132/ENSG00000182175/ENSG00000145423/ENSG00000166949/ENSG00000176887/ENSG00000137573/ENSG00000114251/ENSG00000125378/ENSG00000138696/ENSG00000151136/ENSG00000142871/ENSG00000179776/ENSG00000129757/ENSG00000090539/ENSG00000125931/ENSG00000164692/ENSG00000153071/ENSG00000164488/ENSG00000108654/ENSG00000144355/ENSG00000137090/ENSG00000079805…	74
GO:0010811	positive regulation of cell-substrate adhesion	30/2947	125/20870	0.00212883	0.0320788	0.026779	ENSG00000102606/ENSG00000164318/ENSG00000103241/ENSG00000166949/ENSG00000091986/ENSG00000142871/ENSG00000184371/ENSG00000006210/ENSG00000152592/ENSG00000079805/ENSG00000138080/ENSG00000196924/ENSG00000248905/ENSG00000170961/ENSG00000091409/ENSG00000119185/ENSG00000128052/ENSG00000179820/ENSG00000111859/ENSG00000185624/ENSG00000100034/ENSG00000067606/ENSG00000120899/ENSG00000105894/ENSG00000132669…	30
GO:0021879	forebrain neuron differentiation	14/2947	44/20870	0.00216356	0.032525	0.0271515	ENSG00000117707/ENSG00000066468/ENSG00000118257/ENSG00000007372/ENSG00000119042/ENSG00000165240/ENSG00000144355/ENSG00000153266/ENSG00000176165/ENSG00000179348/ENSG00000122641/ENSG00000106852/ENSG00000136535/ENSG00000170315	14
GO:0048644	muscle organ morphogenesis	21/2947	78/20870	0.00217417	0.0325434	0.0271669	ENSG00000117707/ENSG00000150347/ENSG00000066468/ENSG00000168779/ENSG00000114251/ENSG00000242689/ENSG00000060718/ENSG00000128917/ENSG00000054598/ENSG00000160973/ENSG00000133937/ENSG00000135547/ENSG00000016082/ENSG00000183072/ENSG00000157168/ENSG00000168214/ENSG00000125878/ENSG00000092969/ENSG00000118194/ENSG00000179588/ENSG00000169946	21
GO:0060323	head morphogenesis	12/2947	35/20870	0.00217502	0.0325434	0.0271669	ENSG00000167522/ENSG00000105880/ENSG00000198807/ENSG00000150347/ENSG00000163132/ENSG00000182220/ENSG00000108821/ENSG00000121005/ENSG00000087245/ENSG00000134853/ENSG00000137868/ENSG00000119699	12
GO:0072171	mesonephric tubule morphogenesis	19/2947	68/20870	0.00218053	0.0325493	0.0271718	ENSG00000184937/ENSG00000145536/ENSG00000135744/ENSG00000125378/ENSG00000125931/ENSG00000104313/ENSG00000113578/ENSG00000248905/ENSG00000168621/ENSG00000106571/ENSG00000147257/ENSG00000260027/ENSG00000136997/ENSG00000143867/ENSG00000125618/ENSG00000103449/ENSG00000128602/ENSG00000118526/ENSG00000125084	19
GO:0072089	stem cell proliferation	20/2947	73/20870	0.00218732	0.0325742	0.0271926	ENSG00000085276/ENSG00000145423/ENSG00000176887/ENSG00000114251/ENSG00000174059/ENSG00000125931/ENSG00000149948/ENSG00000164104/ENSG00000136504/ENSG00000244754/ENSG00000112333/ENSG00000172818/ENSG00000071994/ENSG00000159216/ENSG00000135111/ENSG00000206557/ENSG00000125084/ENSG00000169884/ENSG00000250067/ENSG00000185650	20
GO:0032970	regulation of actin filament-based process	81/2947	422/20870	0.0022176	0.0329479	0.0275045	ENSG00000113448/ENSG00000117707/ENSG00000145362/ENSG00000047648/ENSG00000042493/ENSG00000163539/ENSG00000158055/ENSG00000064042/ENSG00000106683/ENSG00000166949/ENSG00000204713/ENSG00000138443/ENSG00000143322/ENSG00000170776/ENSG00000186635/ENSG00000146376/ENSG00000006740/ENSG00000111348/ENSG00000142632/ENSG00000111229/ENSG00000088280/ENSG00000175866/ENSG00000128298/ENSG00000109743/ENSG00000130303…	81
GO:1903035	negative regulation of response to wounding	26/2947	104/20870	0.00222625	0.0329993	0.0275474	ENSG00000173918/ENSG00000163539/ENSG00000182175/ENSG00000166949/ENSG00000232810/ENSG00000183044/ENSG00000196581/ENSG00000108839/ENSG00000147044/ENSG00000174059/ENSG00000143418/ENSG00000078401/ENSG00000113161/ENSG00000137261/ENSG00000177791/ENSG00000164867/ENSG00000134853/ENSG00000144824/ENSG00000104368/ENSG00000122861/ENSG00000040608/ENSG00000106366/ENSG00000003436/ENSG00000178726/ENSG00000158773…	26
GO:0046578	regulation of Ras protein signal transduction	46/2947	215/20870	0.00230859	0.0341403	0.0285	ENSG00000144711/ENSG00000185989/ENSG00000108669/ENSG00000143322/ENSG00000205336/ENSG00000120907/ENSG00000170776/ENSG00000138639/ENSG00000006740/ENSG00000111348/ENSG00000214944/ENSG00000113916/ENSG00000186716/ENSG00000183323/ENSG00000184371/ENSG00000100055/ENSG00000164741/ENSG00000079805/ENSG00000146425/ENSG00000131037/ENSG00000181104/ENSG00000164117/ENSG00000070193/ENSG00000204882/ENSG00000177464…	46
GO:0001952	regulation of cell-matrix adhesion	33/2947	142/20870	0.00232115	0.0342464	0.0285885	ENSG00000047648/ENSG00000163539/ENSG00000204580/ENSG00000064042/ENSG00000166949/ENSG00000196581/ENSG00000113916/ENSG00000109743/ENSG00000147044/ENSG00000110880/ENSG00000184371/ENSG00000006210/ENSG00000164741/ENSG00000112679/ENSG00000044524/ENSG00000248905/ENSG00000119185/ENSG00000128052/ENSG00000123384/ENSG00000169856/ENSG00000144824/ENSG00000145675/ENSG00000122861/ENSG00000100034/ENSG00000067606…	33
GO:0044344	cellular response to fibroblast growth factor stimulus	28/2947	115/20870	0.00234859	0.0345711	0.0288595	ENSG00000066468/ENSG00000137573/ENSG00000114251/ENSG00000171388/ENSG00000108821/ENSG00000128917/ENSG00000113578/ENSG00000070193/ENSG00000114279/ENSG00000162344/ENSG00000078579/ENSG00000102678/ENSG00000068078/ENSG00000185070/ENSG00000166225/ENSG00000114378/ENSG00000068001/ENSG00000119185/ENSG00000133116/ENSG00000284231/ENSG00000070614/ENSG00000124813/ENSG00000112562/ENSG00000164056/ENSG00000196562…	28
GO:0048592	eye morphogenesis	38/2947	170/20870	0.00239619	0.0351903	0.0293764	ENSG00000146555/ENSG00000117707/ENSG00000101144/ENSG00000197406/ENSG00000143995/ENSG00000129535/ENSG00000007372/ENSG00000164093/ENSG00000057657/ENSG00000204227/ENSG00000176887/ENSG00000218336/ENSG00000137203/ENSG00000114251/ENSG00000138443/ENSG00000184254/ENSG00000030110/ENSG00000137936/ENSG00000125378/ENSG00000104327/ENSG00000242689/ENSG00000171587/ENSG00000142627/ENSG00000154928/ENSG00000166225…	38
GO:1903053	regulation of extracellular matrix organization	16/2947	54/20870	0.00247157	0.0362137	0.0302308	ENSG00000163539/ENSG00000204580/ENSG00000166949/ENSG00000135744/ENSG00000003402/ENSG00000162733/ENSG00000197635/ENSG00000138080/ENSG00000075618/ENSG00000170961/ENSG00000123384/ENSG00000144824/ENSG00000159216/ENSG00000125878/ENSG00000067182/ENSG00000028137	16
GO:0007405	neuroblast proliferation	17/2947	59/20870	0.00255606	0.0372798	0.0311208	ENSG00000066468/ENSG00000007372/ENSG00000134532/ENSG00000006210/ENSG00000116641/ENSG00000066629/ENSG00000129682/ENSG00000176165/ENSG00000166225/ENSG00000106571/ENSG00000072864/ENSG00000133961/ENSG00000196576/ENSG00000105894/ENSG00000161800/ENSG00000128602/ENSG00000148704	17
GO:0051703	biological process involved in intraspecies interaction between organisms	17/2947	59/20870	0.00255606	0.0372798	0.0311208	ENSG00000163064/ENSG00000179915/ENSG00000141564/ENSG00000101200/ENSG00000100888/ENSG00000132535/ENSG00000148730/ENSG00000053918/ENSG00000169057/ENSG00000146938/ENSG00000112333/ENSG00000110076/ENSG00000101405/ENSG00000165186/ENSG00000161681/ENSG00000162105/ENSG00000197969	17
GO:0072088	nephron epithelium morphogenesis	21/2947	79/20870	0.00257442	0.0374616	0.0312725	ENSG00000184937/ENSG00000145536/ENSG00000135744/ENSG00000125378/ENSG00000125931/ENSG00000104313/ENSG00000113578/ENSG00000248905/ENSG00000168621/ENSG00000106571/ENSG00000147257/ENSG00000260027/ENSG00000177508/ENSG00000136997/ENSG00000143867/ENSG00000125618/ENSG00000103449/ENSG00000128602/ENSG00000118526/ENSG00000126562/ENSG00000125084	21
GO:0006081	cellular aldehyde metabolic process	19/2947	69/20870	0.00261771	0.0378592	0.0316044	ENSG00000138061/ENSG00000197894/ENSG00000128918/ENSG00000184254/ENSG00000108602/ENSG00000132746/ENSG00000164904/ENSG00000135697/ENSG00000197580/ENSG00000186684/ENSG00000168237/ENSG00000137106/ENSG00000241935/ENSG00000178922/ENSG00000138413/ENSG00000160209/ENSG00000108439/ENSG00000121039/ENSG00000072042	19
GO:0021885	forebrain cell migration	19/2947	69/20870	0.00261771	0.0378592	0.0316044	ENSG00000205336/ENSG00000004848/ENSG00000166780/ENSG00000107562/ENSG00000173406/ENSG00000170370/ENSG00000153266/ENSG00000129682/ENSG00000176165/ENSG00000106571/ENSG00000106852/ENSG00000125505/ENSG00000112333/ENSG00000157168/ENSG00000184486/ENSG00000198914/ENSG00000169855/ENSG00000115310/ENSG00000164828	19
GO:0003272	endocardial cushion formation	10/2947	27/20870	0.00262555	0.0378592	0.0316044	ENSG00000101144/ENSG00000163132/ENSG00000135547/ENSG00000163909/ENSG00000168214/ENSG00000169855/ENSG00000185008/ENSG00000019549/ENSG00000135111/ENSG00000092969	10
GO:0045606	positive regulation of epidermal cell differentiation	10/2947	27/20870	0.00262555	0.0378592	0.0316044	ENSG00000179593/ENSG00000125378/ENSG00000175832/ENSG00000054598/ENSG00000162891/ENSG00000099284/ENSG00000243678/ENSG00000137497/ENSG00000027075/ENSG00000088002	10
GO:0042060	wound healing	90/2947	480/20870	0.00268301	0.0386001	0.032223	ENSG00000057593/ENSG00000204301/ENSG00000173918/ENSG00000163539/ENSG00000204580/ENSG00000066468/ENSG00000158055/ENSG00000166949/ENSG00000232810/ENSG00000114251/ENSG00000183044/ENSG00000006831/ENSG00000196581/ENSG00000108839/ENSG00000197043/ENSG00000138639/ENSG00000142632/ENSG00000198663/ENSG00000147044/ENSG00000142871/ENSG00000174059/ENSG00000003402/ENSG00000163347/ENSG00000108821/ENSG00000172725…	90
GO:0015732	prostaglandin transport	8/2947	19/20870	0.00276054	0.0391028	0.0326425	ENSG00000023839/ENSG00000125257/ENSG00000078401/ENSG00000174697/ENSG00000108984/ENSG00000007171/ENSG00000101405/ENSG00000141655	8
GO:0042474	middle ear morphogenesis	8/2947	19/20870	0.00276054	0.0391028	0.0326425	ENSG00000163132/ENSG00000078401/ENSG00000104313/ENSG00000133937/ENSG00000105996/ENSG00000109705/ENSG00000143867/ENSG00000164920	8
GO:0045618	positive regulation of keratinocyte differentiation	8/2947	19/20870	0.00276054	0.0391028	0.0326425	ENSG00000179593/ENSG00000175832/ENSG00000054598/ENSG00000162891/ENSG00000099284/ENSG00000243678/ENSG00000137497/ENSG00000027075	8
GO:0060039	pericardium development	8/2947	19/20870	0.00276054	0.0391028	0.0326425	ENSG00000089225/ENSG00000101144/ENSG00000166949/ENSG00000114251/ENSG00000184937/ENSG00000136280/ENSG00000128917/ENSG00000164107	8
GO:0061323	cell proliferation involved in heart morphogenesis	8/2947	19/20870	0.00276054	0.0391028	0.0326425	ENSG00000089225/ENSG00000164093/ENSG00000125378/ENSG00000104313/ENSG00000164107/ENSG00000016082/ENSG00000168214/ENSG00000135111	8
GO:0061003	positive regulation of dendritic spine morphogenesis	9/2947	23/20870	0.00276262	0.0391028	0.0326425	ENSG00000175866/ENSG00000198908/ENSG00000058404/ENSG00000110888/ENSG00000113758/ENSG00000136279/ENSG00000103319/ENSG00000158301/ENSG00000077264	9
GO:0007269	neurotransmitter secretion	34/2947	149/20870	0.00276714	0.0391028	0.0326425	ENSG00000102468/ENSG00000179915/ENSG00000164742/ENSG00000120907/ENSG00000165995/ENSG00000081803/ENSG00000147044/ENSG00000080644/ENSG00000169684/ENSG00000145920/ENSG00000149927/ENSG00000047579/ENSG00000102081/ENSG00000164850/ENSG00000124493/ENSG00000135312/ENSG00000081189/ENSG00000169760/ENSG00000110076/ENSG00000139220/ENSG00000177380/ENSG00000158528/ENSG00000155093/ENSG00000089169/ENSG00000050438…	34
GO:0099643	signal release from synapse	34/2947	149/20870	0.00276714	0.0391028	0.0326425	ENSG00000102468/ENSG00000179915/ENSG00000164742/ENSG00000120907/ENSG00000165995/ENSG00000081803/ENSG00000147044/ENSG00000080644/ENSG00000169684/ENSG00000145920/ENSG00000149927/ENSG00000047579/ENSG00000102081/ENSG00000164850/ENSG00000124493/ENSG00000135312/ENSG00000081189/ENSG00000169760/ENSG00000110076/ENSG00000139220/ENSG00000177380/ENSG00000158528/ENSG00000155093/ENSG00000089169/ENSG00000050438…	34
GO:0006885	regulation of pH	24/2947	95/20870	0.00277893	0.0391824	0.032709	ENSG00000178301/ENSG00000186009/ENSG00000110955/ENSG00000071553/ENSG00000182220/ENSG00000113732/ENSG00000047249/ENSG00000101200/ENSG00000168748/ENSG00000169504/ENSG00000078401/ENSG00000005882/ENSG00000091137/ENSG00000033867/ENSG00000050438/ENSG00000066230/ENSG00000135740/ENSG00000198689/ENSG00000065923/ENSG00000110719/ENSG00000101337/ENSG00000134851/ENSG00000116857/ENSG00000139719	24
GO:0030336	negative regulation of cell migration	73/2947	377/20870	0.0028179	0.0396439	0.0330943	ENSG00000185551/ENSG00000138061/ENSG00000089225/ENSG00000163638/ENSG00000163539/ENSG00000064042/ENSG00000145423/ENSG00000137573/ENSG00000232810/ENSG00000140526/ENSG00000205336/ENSG00000006831/ENSG00000179593/ENSG00000091879/ENSG00000111348/ENSG00000166780/ENSG00000130303/ENSG00000167851/ENSG00000143418/ENSG00000090539/ENSG00000169504/ENSG00000172725/ENSG00000110880/ENSG00000006210/ENSG00000107562…	73
GO:0031128	developmental induction	12/2947	36/20870	0.00284904	0.0399934	0.0333861	ENSG00000169083/ENSG00000114251/ENSG00000125378/ENSG00000113578/ENSG00000070193/ENSG00000166225/ENSG00000168621/ENSG00000169855/ENSG00000185008/ENSG00000103449/ENSG00000164056/ENSG00000125084	12
GO:0071774	response to fibroblast growth factor	29/2947	122/20870	0.00290763	0.0407261	0.0339977	ENSG00000066468/ENSG00000137573/ENSG00000114251/ENSG00000171388/ENSG00000108821/ENSG00000128917/ENSG00000126767/ENSG00000113578/ENSG00000070193/ENSG00000114279/ENSG00000162344/ENSG00000078579/ENSG00000102678/ENSG00000068078/ENSG00000185070/ENSG00000166225/ENSG00000114378/ENSG00000068001/ENSG00000119185/ENSG00000133116/ENSG00000284231/ENSG00000070614/ENSG00000124813/ENSG00000112562/ENSG00000164056…	29
GO:1902041	regulation of extrinsic apoptotic signaling pathway via death domain receptors	15/2947	50/20870	0.00291693	0.0407665	0.0340314	ENSG00000145423/ENSG00000138696/ENSG00000003402/ENSG00000158234/ENSG00000135472/ENSG00000019991/ENSG00000164104/ENSG00000110514/ENSG00000164867/ENSG00000106366/ENSG00000136603/ENSG00000067066/ENSG00000103496/ENSG00000100234/ENSG00000135926	15
GO:0001708	cell fate specification	26/2947	106/20870	0.0029556	0.041207	0.0343991	ENSG00000180613/ENSG00000089225/ENSG00000169083/ENSG00000007372/ENSG00000145423/ENSG00000092607/ENSG00000114251/ENSG00000134982/ENSG00000064218/ENSG00000104413/ENSG00000104313/ENSG00000106571/ENSG00000133937/ENSG00000128710/ENSG00000016082/ENSG00000140538/ENSG00000177468/ENSG00000184486/ENSG00000204531/ENSG00000168214/ENSG00000128602/ENSG00000136535/ENSG00000135111/ENSG00000121075/ENSG00000164458…	26
GO:0042310	vasoconstriction	22/2947	85/20870	0.00296141	0.041207	0.0343991	ENSG00000107796/ENSG00000196639/ENSG00000102468/ENSG00000120907/ENSG00000135744/ENSG00000171388/ENSG00000101200/ENSG00000168398/ENSG00000133019/ENSG00000078401/ENSG00000151617/ENSG00000181104/ENSG00000265107/ENSG00000113161/ENSG00000135312/ENSG00000179546/ENSG00000174697/ENSG00000134640/ENSG00000183023/ENSG00000188176/ENSG00000101400/ENSG00000130529	22
GO:1905330	regulation of morphogenesis of an epithelium	21/2947	80/20870	0.00303491	0.0421376	0.035176	ENSG00000091831/ENSG00000169083/ENSG00000101144/ENSG00000114861/ENSG00000137573/ENSG00000232810/ENSG00000114251/ENSG00000151388/ENSG00000135744/ENSG00000108839/ENSG00000125378/ENSG00000113578/ENSG00000070193/ENSG00000168621/ENSG00000019991/ENSG00000260027/ENSG00000128714/ENSG00000074527/ENSG00000125618/ENSG00000128602/ENSG00000111186	21
GO:0097191	extrinsic apoptotic signaling pathway	51/2947	247/20870	0.00304775	0.0422237	0.0352478	ENSG00000169083/ENSG00000145423/ENSG00000166949/ENSG00000232810/ENSG00000135744/ENSG00000030110/ENSG00000137875/ENSG00000166681/ENSG00000196072/ENSG00000125378/ENSG00000138696/ENSG00000003402/ENSG00000006210/ENSG00000160570/ENSG00000155792/ENSG00000104313/ENSG00000158161/ENSG00000112319/ENSG00000158234/ENSG00000135472/ENSG00000070193/ENSG00000068078/ENSG00000168621/ENSG00000164850/ENSG00000019991…	51
GO:0048640	negative regulation of developmental growth	28/2947	117/20870	0.00306581	0.0423815	0.0353796	ENSG00000089225/ENSG00000078900/ENSG00000143995/ENSG00000182175/ENSG00000012171/ENSG00000144560/ENSG00000114251/ENSG00000125378/ENSG00000111276/ENSG00000187323/ENSG00000135333/ENSG00000129682/ENSG00000068078/ENSG00000160211/ENSG00000130513/ENSG00000082482/ENSG00000137261/ENSG00000207752/ENSG00000177791/ENSG00000065320/ENSG00000138207/ENSG00000116741/ENSG00000117152/ENSG00000115310/ENSG00000040608…	28
GO:0045669	positive regulation of osteoblast differentiation	20/2947	75/20870	0.00309137	0.0426422	0.0355972	ENSG00000101144/ENSG00000145423/ENSG00000176887/ENSG00000071553/ENSG00000125378/ENSG00000138696/ENSG00000142871/ENSG00000164932/ENSG00000162733/ENSG00000162643/ENSG00000186188/ENSG00000106571/ENSG00000019991/ENSG00000017427/ENSG00000160712/ENSG00000081189/ENSG00000207713/ENSG00000124813/ENSG00000183160/ENSG00000169884	20
GO:0001658	branching involved in ureteric bud morphogenesis	17/2947	60/20870	0.00310551	0.0427444	0.0356825	ENSG00000184937/ENSG00000145536/ENSG00000135744/ENSG00000125378/ENSG00000125931/ENSG00000104313/ENSG00000113578/ENSG00000168621/ENSG00000106571/ENSG00000147257/ENSG00000260027/ENSG00000136997/ENSG00000125618/ENSG00000103449/ENSG00000128602/ENSG00000118526/ENSG00000125084	17
GO:0030858	positive regulation of epithelial cell differentiation	18/2947	65/20870	0.00313286	0.0430278	0.0359191	ENSG00000007372/ENSG00000179593/ENSG00000125378/ENSG00000272398/ENSG00000175832/ENSG00000054598/ENSG00000263761/ENSG00000168621/ENSG00000162891/ENSG00000099284/ENSG00000207713/ENSG00000243678/ENSG00000137497/ENSG00000125618/ENSG00000027075/ENSG00000106366/ENSG00000088002/ENSG00000169884	18
GO:0036294	cellular response to decreased oxygen levels	37/2947	167/20870	0.00317686	0.043538	0.036345	ENSG00000101144/ENSG00000069667/ENSG00000156709/ENSG00000162433/ENSG00000240583/ENSG00000165240/ENSG00000109956/ENSG00000134057/ENSG00000174059/ENSG00000003402/ENSG00000131055/ENSG00000153904/ENSG00000078401/ENSG00000103319/ENSG00000129521/ENSG00000187840/ENSG00000197930/ENSG00000166135/ENSG00000082482/ENSG00000160789/ENSG00000135679/ENSG00000137463/ENSG00000136997/ENSG00000105835/ENSG00000105373…	37
GO:0060612	adipose tissue development	13/2947	41/20870	0.0031861	0.0435708	0.0363724	ENSG00000150347/ENSG00000148339/ENSG00000184675/ENSG00000113369/ENSG00000184371/ENSG00000221818/ENSG00000118263/ENSG00000174697/ENSG00000112033/ENSG00000133104/ENSG00000130529/ENSG00000170315/ENSG00000177398	13
GO:0021988	olfactory lobe development	11/2947	32/20870	0.00321761	0.0436264	0.0364188	ENSG00000180613/ENSG00000105880/ENSG00000114251/ENSG00000004848/ENSG00000178568/ENSG00000128610/ENSG00000112333/ENSG00000169855/ENSG00000185008/ENSG00000103449/ENSG00000164853	11
GO:0045684	positive regulation of epidermis development	11/2947	32/20870	0.00321761	0.0436264	0.0364188	ENSG00000179593/ENSG00000125378/ENSG00000175832/ENSG00000054598/ENSG00000162891/ENSG00000099284/ENSG00000243678/ENSG00000137497/ENSG00000112033/ENSG00000027075/ENSG00000088002	11
GO:0060317	cardiac epithelial to mesenchymal transition	11/2947	32/20870	0.00321761	0.0436264	0.0364188	ENSG00000163132/ENSG00000170961/ENSG00000135547/ENSG00000163909/ENSG00000168214/ENSG00000115310/ENSG00000019549/ENSG00000164056/ENSG00000135111/ENSG00000092969/ENSG00000122691	11
GO:0060914	heart formation	11/2947	32/20870	0.00321761	0.0436264	0.0364188	ENSG00000089225/ENSG00000114251/ENSG00000125378/ENSG00000104313/ENSG00000160973/ENSG00000164107/ENSG00000016082/ENSG00000081189/ENSG00000168214/ENSG00000169855/ENSG00000185008	11
GO:0031532	actin cytoskeleton reorganization	27/2947	112/20870	0.00322711	0.0436622	0.0364487	ENSG00000174672/ENSG00000198752/ENSG00000164877/ENSG00000143322/ENSG00000186635/ENSG00000111348/ENSG00000100628/ENSG00000175866/ENSG00000128298/ENSG00000047579/ENSG00000182511/ENSG00000070193/ENSG00000196924/ENSG00000101336/ENSG00000174775/ENSG00000111859/ENSG00000123572/ENSG00000140538/ENSG00000197702/ENSG00000188677/ENSG00000138964/ENSG00000134853/ENSG00000120899/ENSG00000170381/ENSG00000120156…	27
GO:0099504	synaptic vesicle cycle	41/2947	190/20870	0.00328315	0.044326	0.0370028	ENSG00000174672/ENSG00000102468/ENSG00000073921/ENSG00000179869/ENSG00000164742/ENSG00000120907/ENSG00000165995/ENSG00000081803/ENSG00000147044/ENSG00000169684/ENSG00000145920/ENSG00000079805/ENSG00000149927/ENSG00000047579/ENSG00000157107/ENSG00000102466/ENSG00000102081/ENSG00000135312/ENSG00000205726/ENSG00000169760/ENSG00000169992/ENSG00000146938/ENSG00000079482/ENSG00000124507/ENSG00000139220…	41
GO:0022404	molting cycle process	23/2947	91/20870	0.00334326	0.0449466	0.0375209	ENSG00000052850/ENSG00000066468/ENSG00000232810/ENSG00000114251/ENSG00000165240/ENSG00000167968/ENSG00000158813/ENSG00000070193/ENSG00000164930/ENSG00000120370/ENSG00000116478/ENSG00000173083/ENSG00000115461/ENSG00000122641/ENSG00000147383/ENSG00000137497/ENSG00000168214/ENSG00000128602/ENSG00000171243/ENSG00000092969/ENSG00000175894/ENSG00000135925/ENSG00000169884	23
GO:0022405	hair cycle process	23/2947	91/20870	0.00334326	0.0449466	0.0375209	ENSG00000052850/ENSG00000066468/ENSG00000232810/ENSG00000114251/ENSG00000165240/ENSG00000167968/ENSG00000158813/ENSG00000070193/ENSG00000164930/ENSG00000120370/ENSG00000116478/ENSG00000173083/ENSG00000115461/ENSG00000122641/ENSG00000147383/ENSG00000137497/ENSG00000168214/ENSG00000128602/ENSG00000171243/ENSG00000092969/ENSG00000175894/ENSG00000135925/ENSG00000169884	23
GO:0021978	telencephalon regionalization	6/2947	12/20870	0.00338834	0.0450088	0.0375728	ENSG00000180613/ENSG00000007372/ENSG00000205336/ENSG00000125378/ENSG00000135638/ENSG00000170370	6
GO:0048934	peripheral nervous system neuron differentiation	6/2947	12/20870	0.00338834	0.0450088	0.0375728	ENSG00000164107/ENSG00000128710/ENSG00000128709/ENSG00000016082/ENSG00000159216/ENSG00000020633	6
GO:0048935	peripheral nervous system neuron development	6/2947	12/20870	0.00338834	0.0450088	0.0375728	ENSG00000164107/ENSG00000128710/ENSG00000128709/ENSG00000016082/ENSG00000159216/ENSG00000020633	6
GO:0060442	branching involved in prostate gland morphogenesis	6/2947	12/20870	0.00338834	0.0450088	0.0375728	ENSG00000091831/ENSG00000101144/ENSG00000066468/ENSG00000125378/ENSG00000166225/ENSG00000128714	6
GO:1904748	regulation of apoptotic process involved in development	6/2947	12/20870	0.00338834	0.0450088	0.0375728	ENSG00000101144/ENSG00000054598/ENSG00000125618/ENSG00000092969/ENSG00000067182/ENSG00000028137	6
GO:0030004	cellular monovalent inorganic cation homeostasis	26/2947	107/20870	0.00339035	0.0450088	0.0375728	ENSG00000178301/ENSG00000186009/ENSG00000135744/ENSG00000143153/ENSG00000069849/ENSG00000110955/ENSG00000071553/ENSG00000182220/ENSG00000113732/ENSG00000047249/ENSG00000101200/ENSG00000168748/ENSG00000169504/ENSG00000079215/ENSG00000033867/ENSG00000050438/ENSG00000183023/ENSG00000066230/ENSG00000135740/ENSG00000198689/ENSG00000065923/ENSG00000110719/ENSG00000101337/ENSG00000134851/ENSG00000116857…	26
GO:0001974	blood vessel remodeling	14/2947	46/20870	0.00343351	0.0452982	0.0378144	ENSG00000105997/ENSG00000135744/ENSG00000165240/ENSG00000030110/ENSG00000128917/ENSG00000070193/ENSG00000196924/ENSG00000054598/ENSG00000135679/ENSG00000081189/ENSG00000164867/ENSG00000168214/ENSG00000146374/ENSG00000135926	14
GO:0021517	ventral spinal cord development	14/2947	46/20870	0.00343351	0.0452982	0.0378144	ENSG00000007372/ENSG00000173406/ENSG00000128917/ENSG00000064218/ENSG00000187240/ENSG00000179348/ENSG00000106571/ENSG00000128710/ENSG00000016082/ENSG00000121454/ENSG00000177468/ENSG00000000457/ENSG00000124766/ENSG00000126970	14
GO:0089718	amino acid import across plasma membrane	14/2947	46/20870	0.00343351	0.0452982	0.0378144	ENSG00000092068/ENSG00000135744/ENSG00000152822/ENSG00000116741/ENSG00000117152/ENSG00000147100/ENSG00000110436/ENSG00000079215/ENSG00000105281/ENSG00000168003/ENSG00000149150/ENSG00000167703/ENSG00000010379/ENSG00000165349	14
GO:0043401	steroid hormone mediated signaling pathway	34/2947	151/20870	0.00347257	0.0457186	0.0381654	ENSG00000091831/ENSG00000196482/ENSG00000196498/ENSG00000169083/ENSG00000101144/ENSG00000114861/ENSG00000048540/ENSG00000204231/ENSG00000140526/ENSG00000125378/ENSG00000012822/ENSG00000111596/ENSG00000125831/ENSG00000172817/ENSG00000153071/ENSG00000108654/ENSG00000119715/ENSG00000160973/ENSG00000164850/ENSG00000116478/ENSG00000163909/ENSG00000149948/ENSG00000016082/ENSG00000169297/ENSG00000120798…	34
GO:0040013	negative regulation of locomotion	81/2947	429/20870	0.00350502	0.0460505	0.0384424	ENSG00000185551/ENSG00000138061/ENSG00000089225/ENSG00000163638/ENSG00000163539/ENSG00000064042/ENSG00000012171/ENSG00000145423/ENSG00000137573/ENSG00000232810/ENSG00000114251/ENSG00000140526/ENSG00000205336/ENSG00000006831/ENSG00000179593/ENSG00000091879/ENSG00000111348/ENSG00000113369/ENSG00000166780/ENSG00000130303/ENSG00000183323/ENSG00000167851/ENSG00000143418/ENSG00000090539/ENSG00000169504…	81
GO:0061640	cytoskeleton-dependent cytokinesis	25/2947	102/20870	0.00355397	0.0465973	0.0388989	ENSG00000151150/ENSG00000122966/ENSG00000184640/ENSG00000134982/ENSG00000138180/ENSG00000255112/ENSG00000086065/ENSG00000176108/ENSG00000044090/ENSG00000137100/ENSG00000114346/ENSG00000183690/ENSG00000137807/ENSG00000090889/ENSG00000158411/ENSG00000161800/ENSG00000067900/ENSG00000140623/ENSG00000108387/ENSG00000125354/ENSG00000157060/ENSG00000173548/ENSG00000115306/ENSG00000124356/ENSG00000072121	25
GO:0048520	positive regulation of behavior	10/2947	28/20870	0.0035739	0.0467622	0.0390365	ENSG00000068024/ENSG00000187094/ENSG00000147571/ENSG00000121853/ENSG00000081189/ENSG00000134640/ENSG00000169760/ENSG00000170485/ENSG00000118473/ENSG00000137868	10
GO:0035850	epithelial cell differentiation involved in kidney development	15/2947	51/20870	0.00360203	0.0470335	0.039263	ENSG00000107796/ENSG00000184937/ENSG00000171456/ENSG00000125378/ENSG00000272398/ENSG00000174059/ENSG00000125931/ENSG00000168621/ENSG00000177464/ENSG00000172037/ENSG00000081189/ENSG00000143867/ENSG00000125618/ENSG00000103449/ENSG00000128602	15
GO:0055067	monovalent inorganic cation homeostasis	35/2947	157/20870	0.0036307	0.0473107	0.0394944	ENSG00000178301/ENSG00000186009/ENSG00000135744/ENSG00000143153/ENSG00000069849/ENSG00000110955/ENSG00000071553/ENSG00000182220/ENSG00000113732/ENSG00000047249/ENSG00000101200/ENSG00000168748/ENSG00000169504/ENSG00000145244/ENSG00000078401/ENSG00000101405/ENSG00000005882/ENSG00000111319/ENSG00000124067/ENSG00000221955/ENSG00000079215/ENSG00000091137/ENSG00000033867/ENSG00000050438/ENSG00000183023…	35
GO:0150116	regulation of cell-substrate junction organization	20/2947	76/20870	0.00364921	0.0474547	0.0396146	ENSG00000144711/ENSG00000047648/ENSG00000163539/ENSG00000064042/ENSG00000166949/ENSG00000110880/ENSG00000164741/ENSG00000112679/ENSG00000044524/ENSG00000248905/ENSG00000119185/ENSG00000128052/ENSG00000123384/ENSG00000144824/ENSG00000145675/ENSG00000100034/ENSG00000179051/ENSG00000067900/ENSG00000065613/ENSG00000120156	20
GO:0014046	dopamine secretion	12/2947	37/20870	0.00368289	0.0475975	0.0397338	ENSG00000102468/ENSG00000183044/ENSG00000107562/ENSG00000047579/ENSG00000078579/ENSG00000168621/ENSG00000135312/ENSG00000067715/ENSG00000204176/ENSG00000213023/ENSG00000134207/ENSG00000149043	12
GO:0014059	regulation of dopamine secretion	12/2947	37/20870	0.00368289	0.0475975	0.0397338	ENSG00000102468/ENSG00000183044/ENSG00000107562/ENSG00000047579/ENSG00000078579/ENSG00000168621/ENSG00000135312/ENSG00000067715/ENSG00000204176/ENSG00000213023/ENSG00000134207/ENSG00000149043	12
GO:0070306	lens fiber cell differentiation	12/2947	37/20870	0.00368289	0.0475975	0.0397338	ENSG00000117707/ENSG00000102878/ENSG00000166949/ENSG00000138443/ENSG00000111276/ENSG00000142627/ENSG00000166225/ENSG00000127252/ENSG00000136603/ENSG00000198369/ENSG00000164056/ENSG00000111186	12
GO:0051784	negative regulation of nuclear division	16/2947	56/20870	0.00370348	0.0475975	0.0397338	ENSG00000101144/ENSG00000110200/ENSG00000134982/ENSG00000149311/ENSG00000125378/ENSG00000134057/ENSG00000137090/ENSG00000156509/ENSG00000113141/ENSG00000002822/ENSG00000128789/ENSG00000040275/ENSG00000141198/ENSG00000175662/ENSG00000126215/ENSG00000174442	16
GO:0061041	regulation of wound healing	33/2947	146/20870	0.00370424	0.0475975	0.0397338	ENSG00000057593/ENSG00000173918/ENSG00000163539/ENSG00000166949/ENSG00000232810/ENSG00000183044/ENSG00000196581/ENSG00000108839/ENSG00000147044/ENSG00000174059/ENSG00000163347/ENSG00000078401/ENSG00000181104/ENSG00000189403/ENSG00000113161/ENSG00000173083/ENSG00000174775/ENSG00000248099/ENSG00000177791/ENSG00000164867/ENSG00000197822/ENSG00000134853/ENSG00000144824/ENSG00000104368/ENSG00000122861…	33
GO:0032956	regulation of actin cytoskeleton organization	73/2947	381/20870	0.0037051	0.0475975	0.0397338	ENSG00000117707/ENSG00000047648/ENSG00000042493/ENSG00000163539/ENSG00000158055/ENSG00000064042/ENSG00000106683/ENSG00000166949/ENSG00000204713/ENSG00000138443/ENSG00000143322/ENSG00000170776/ENSG00000186635/ENSG00000146376/ENSG00000006740/ENSG00000111348/ENSG00000142632/ENSG00000111229/ENSG00000088280/ENSG00000175866/ENSG00000128298/ENSG00000109743/ENSG00000130303/ENSG00000115355/ENSG00000172725…	73
GO:0022029	telencephalon cell migration	18/2947	66/20870	0.00374968	0.0480731	0.0401308	ENSG00000205336/ENSG00000004848/ENSG00000166780/ENSG00000107562/ENSG00000173406/ENSG00000153266/ENSG00000129682/ENSG00000176165/ENSG00000106571/ENSG00000106852/ENSG00000125505/ENSG00000112333/ENSG00000157168/ENSG00000184486/ENSG00000198914/ENSG00000169855/ENSG00000115310/ENSG00000164828	18
GO:0030902	hindbrain development	36/2947	163/20870	0.0037798	0.0483617	0.0403718	ENSG00000180613/ENSG00000120093/ENSG00000115507/ENSG00000117707/ENSG00000101144/ENSG00000163064/ENSG00000069667/ENSG00000090861/ENSG00000183044/ENSG00000128918/ENSG00000095139/ENSG00000165240/ENSG00000172409/ENSG00000173406/ENSG00000164741/ENSG00000135472/ENSG00000196924/ENSG00000054598/ENSG00000179348/ENSG00000170075/ENSG00000152208/ENSG00000105996/ENSG00000173917/ENSG00000044574/ENSG00000171798…	36
GO:0030878	thyroid gland development	9/2947	24/20870	0.00387283	0.0493182	0.0411703	ENSG00000105997/ENSG00000120093/ENSG00000166949/ENSG00000070193/ENSG00000106004/ENSG00000128652/ENSG00000183072/ENSG00000125618/ENSG00000126351	9
GO:0097061	dendritic spine organization	23/2947	92/20870	0.00387397	0.0493182	0.0411703	ENSG00000138443/ENSG00000006740/ENSG00000175866/ENSG00000198908/ENSG00000058404/ENSG00000110888/ENSG00000113758/ENSG00000136279/ENSG00000132535/ENSG00000103319/ENSG00000154928/ENSG00000158301/ENSG00000152413/ENSG00000140443/ENSG00000088899/ENSG00000087053/ENSG00000169760/ENSG00000077264/ENSG00000139220/ENSG00000158528/ENSG00000161681/ENSG00000277363/ENSG00000101040	23
GO:0150115	cell-substrate junction organization	26/2947	108/20870	0.00387783	0.0493182	0.0411703	ENSG00000144711/ENSG00000047648/ENSG00000102606/ENSG00000163539/ENSG00000064042/ENSG00000166949/ENSG00000186716/ENSG00000110880/ENSG00000164741/ENSG00000112679/ENSG00000044524/ENSG00000248905/ENSG00000091409/ENSG00000119185/ENSG00000128052/ENSG00000123384/ENSG00000144824/ENSG00000145675/ENSG00000100034/ENSG00000120899/ENSG00000179051/ENSG00000173156/ENSG00000067900/ENSG00000065613/ENSG00000120156…	26
GO:0006266	DNA ligation	7/2947	16/20870	0.00394006	0.0498109	0.0415815	ENSG00000169621/ENSG00000137074/ENSG00000189403/ENSG00000105486/ENSG00000005156/ENSG00000100109/ENSG00000131747	7
GO:0032310	prostaglandin secretion	7/2947	16/20870	0.00394006	0.0498109	0.0415815	ENSG00000125257/ENSG00000078401/ENSG00000174697/ENSG00000108984/ENSG00000007171/ENSG00000101405/ENSG00000141655	7
GO:2000095	regulation of Wnt signaling pathway, planar cell polarity pathway	7/2947	16/20870	0.00394006	0.0498109	0.0415815	ENSG00000145423/ENSG00000135299/ENSG00000153071/ENSG00000147257/ENSG00000171843/ENSG00000146374/ENSG00000101222	7
GO:0030534	adult behavior	32/2947	141/20870	0.00394919	0.0498272	0.0415952	ENSG00000146555/ENSG00000118971/ENSG00000163064/ENSG00000102468/ENSG00000179915/ENSG00000183044/ENSG00000095139/ENSG00000080644/ENSG00000169684/ENSG00000173786/ENSG00000145708/ENSG00000107562/ENSG00000173406/ENSG00000064218/ENSG00000114279/ENSG00000113327/ENSG00000168621/ENSG00000121853/ENSG00000109738/ENSG00000152413/ENSG00000120068/ENSG00000128710/ENSG00000128709/ENSG00000174697/ENSG00000169057…	32

## Sheet: Molecular Function
ID	Description	GeneRatio	BgRatio	pvalue	p.adjust	qvalue	geneID	Count
GO:0001216	DNA-binding transcription activator activity	137/3023	478/20678	1.01894e-15	1.19026e-12	1.13388e-12	ENSG00000105880/ENSG00000091831/ENSG00000196482/ENSG00000120093/ENSG00000198353/ENSG00000115507/ENSG00000198807/ENSG00000089225/ENSG00000078900/ENSG00000052850/ENSG00000169083/ENSG00000130940/ENSG00000151702/ENSG00000103241/ENSG00000141568/ENSG00000158055/ENSG00000120075/ENSG00000128604/ENSG00000085276/ENSG00000143995/ENSG00000163132/ENSG00000129535/ENSG00000007372/ENSG00000069011/ENSG00000204231…	137
GO:0001228	DNA-binding transcription activator activity, RNA polymerase II-specific	135/3023	472/20678	1.98377e-15	1.19026e-12	1.13388e-12	ENSG00000105880/ENSG00000091831/ENSG00000196482/ENSG00000120093/ENSG00000198353/ENSG00000115507/ENSG00000198807/ENSG00000089225/ENSG00000078900/ENSG00000052850/ENSG00000169083/ENSG00000130940/ENSG00000151702/ENSG00000103241/ENSG00000141568/ENSG00000158055/ENSG00000120075/ENSG00000128604/ENSG00000085276/ENSG00000143995/ENSG00000163132/ENSG00000129535/ENSG00000007372/ENSG00000069011/ENSG00000204231…	135
GO:0001217	DNA-binding transcription repressor activity	91/3023	342/20678	4.35049e-09	1.7402e-06	1.65777e-06	ENSG00000164916/ENSG00000117707/ENSG00000163064/ENSG00000141568/ENSG00000114861/ENSG00000162676/ENSG00000124831/ENSG00000163132/ENSG00000175745/ENSG00000007372/ENSG00000057657/ENSG00000166949/ENSG00000092607/ENSG00000137203/ENSG00000140836/ENSG00000004848/ENSG00000112182/ENSG00000113916/ENSG00000095794/ENSG00000169016/ENSG00000123576/ENSG00000157557/ENSG00000146618/ENSG00000128610/ENSG00000153266…	91
GO:0001227	DNA-binding transcription repressor activity, RNA polymerase II-specific	88/3023	339/20678	2.74057e-08	8.22172e-06	7.83227e-06	ENSG00000164916/ENSG00000117707/ENSG00000163064/ENSG00000141568/ENSG00000114861/ENSG00000162676/ENSG00000124831/ENSG00000163132/ENSG00000175745/ENSG00000007372/ENSG00000057657/ENSG00000092607/ENSG00000137203/ENSG00000140836/ENSG00000004848/ENSG00000112182/ENSG00000113916/ENSG00000095794/ENSG00000169016/ENSG00000123576/ENSG00000157557/ENSG00000146618/ENSG00000128610/ENSG00000153266/ENSG00000137166…	88
GO:0071837	HMG box domain binding	8/3023	14/20678	0.000271344	0.0484064	0.0461134	ENSG00000105880/ENSG00000105997/ENSG00000052850/ENSG00000135903/ENSG00000007372/ENSG00000005102/ENSG00000198914/ENSG00000185591	8
GO:0004879	nuclear receptor activity	19/3023	57/20678	0.000305282	0.0484064	0.0461134	ENSG00000185551/ENSG00000091831/ENSG00000196482/ENSG00000169083/ENSG00000175745/ENSG00000069667/ENSG00000204231/ENSG00000119715/ENSG00000120798/ENSG00000112333/ENSG00000113580/ENSG00000116833/ENSG00000112033/ENSG00000131759/ENSG00000077092/ENSG00000143171/ENSG00000168610/ENSG00000126351/ENSG00000151090	19
GO:0098531	ligand-activated transcription factor activity	19/3023	57/20678	0.000305282	0.0484064	0.0461134	ENSG00000185551/ENSG00000091831/ENSG00000196482/ENSG00000169083/ENSG00000175745/ENSG00000069667/ENSG00000204231/ENSG00000119715/ENSG00000120798/ENSG00000112333/ENSG00000113580/ENSG00000116833/ENSG00000112033/ENSG00000131759/ENSG00000077092/ENSG00000143171/ENSG00000168610/ENSG00000126351/ENSG00000151090	19
GO:0005085	guanyl-nucleotide exchange factor activity	56/3023	244/20678	0.000322709	0.0484064	0.0461134	ENSG00000126217/ENSG00000144711/ENSG00000102606/ENSG00000108669/ENSG00000159842/ENSG00000170776/ENSG00000130762/ENSG00000142632/ENSG00000214944/ENSG00000136002/ENSG00000129675/ENSG00000131089/ENSG00000137936/ENSG00000186716/ENSG00000115355/ENSG00000015133/ENSG00000100055/ENSG00000213047/ENSG00000205744/ENSG00000116641/ENSG00000114346/ENSG00000131037/ENSG00000164117/ENSG00000102302/ENSG00000100099…	56

## Sheet: Cellular Component
ID	Description	GeneRatio	BgRatio	pvalue	p.adjust	qvalue	geneID	Count
GO:0097060	synaptic membrane	102/3072	414/21916	4.63536e-09	3.48579e-06	3.17156e-06	ENSG00000150672/ENSG00000145362/ENSG00000151150/ENSG00000136750/ENSG00000102468/ENSG00000165379/ENSG00000118257/ENSG00000179915/ENSG00000073921/ENSG00000164742/ENSG00000120907/ENSG00000029534/ENSG00000166313/ENSG00000117362/ENSG00000182220/ENSG00000175866/ENSG00000147044/ENSG00000040731/ENSG00000168539/ENSG00000133019/ENSG00000080644/ENSG00000169684/ENSG00000158258/ENSG00000139182/ENSG00000149970…	102
GO:0045211	postsynaptic membrane	77/3072	303/21916	8.9561e-08	3.36749e-05	3.06393e-05	ENSG00000150672/ENSG00000145362/ENSG00000151150/ENSG00000102468/ENSG00000165379/ENSG00000118257/ENSG00000073921/ENSG00000164742/ENSG00000120907/ENSG00000029534/ENSG00000166313/ENSG00000182220/ENSG00000040731/ENSG00000168539/ENSG00000133019/ENSG00000080644/ENSG00000169684/ENSG00000158258/ENSG00000139182/ENSG00000149970/ENSG00000113758/ENSG00000136279/ENSG00000187323/ENSG00000132535/ENSG00000079805…	77
GO:0005667	transcription regulator complex	98/3072	450/21916	4.25995e-06	0.00106783	0.000971569	ENSG00000196498/ENSG00000052850/ENSG00000110092/ENSG00000103241/ENSG00000162676/ENSG00000068024/ENSG00000143995/ENSG00000069011/ENSG00000164093/ENSG00000204231/ENSG00000119042/ENSG00000166949/ENSG00000101849/ENSG00000092607/ENSG00000196628/ENSG00000140836/ENSG00000101126/ENSG00000029153/ENSG00000100325/ENSG00000171681/ENSG00000116128/ENSG00000094916/ENSG00000116254/ENSG00000095794/ENSG00000105392…	98
GO:0030027	lamellipodium	55/3072	221/21916	1.13339e-05	0.00213077	0.00193869	ENSG00000107796/ENSG00000102606/ENSG00000042493/ENSG00000198752/ENSG00000159217/ENSG00000106683/ENSG00000132613/ENSG00000136754/ENSG00000138443/ENSG00000099204/ENSG00000163017/ENSG00000166313/ENSG00000163697/ENSG00000134982/ENSG00000129675/ENSG00000111229/ENSG00000175866/ENSG00000115355/ENSG00000172725/ENSG00000110880/ENSG00000113758/ENSG00000136279/ENSG00000149091/ENSG00000079805/ENSG00000197635…	55
GO:0031252	cell leading edge	96/3072	451/21916	1.42241e-05	0.00213931	0.00194646	ENSG00000107796/ENSG00000102606/ENSG00000042493/ENSG00000198752/ENSG00000163539/ENSG00000159217/ENSG00000106683/ENSG00000132613/ENSG00000136754/ENSG00000138443/ENSG00000099204/ENSG00000163017/ENSG00000029534/ENSG00000166313/ENSG00000163697/ENSG00000134982/ENSG00000146376/ENSG00000006740/ENSG00000136002/ENSG00000129675/ENSG00000111229/ENSG00000088280/ENSG00000182220/ENSG00000165240/ENSG00000175866…	96
GO:0017053	transcription repressor complex	22/3072	64/21916	3.25259e-05	0.00357165	0.00324968	ENSG00000196498/ENSG00000110092/ENSG00000162676/ENSG00000068024/ENSG00000101849/ENSG00000092607/ENSG00000094916/ENSG00000106571/ENSG00000116478/ENSG00000135547/ENSG00000189403/ENSG00000183814/ENSG00000244754/ENSG00000168214/ENSG00000169375/ENSG00000185591/ENSG00000172845/ENSG00000065526/ENSG00000109906/ENSG00000179588/ENSG00000267680/ENSG00000256683	22
GO:0098978	glutamatergic synapse	80/3072	368/21916	3.32467e-05	0.00357165	0.00324968	ENSG00000162374/ENSG00000102468/ENSG00000165379/ENSG00000118257/ENSG00000114251/ENSG00000159842/ENSG00000164742/ENSG00000120907/ENSG00000128805/ENSG00000006740/ENSG00000175866/ENSG00000186716/ENSG00000081803/ENSG00000104327/ENSG00000040731/ENSG00000168539/ENSG00000158258/ENSG00000139182/ENSG00000149970/ENSG00000145920/ENSG00000113758/ENSG00000149091/ENSG00000132535/ENSG00000198010/ENSG00000080845…	80
GO:0099572	postsynaptic specialization	83/3072	387/21916	3.97545e-05	0.00373692	0.00340005	ENSG00000150672/ENSG00000144711/ENSG00000165379/ENSG00000136754/ENSG00000164742/ENSG00000185046/ENSG00000006740/ENSG00000131089/ENSG00000165240/ENSG00000175866/ENSG00000186716/ENSG00000040731/ENSG00000168539/ENSG00000080644/ENSG00000158258/ENSG00000139182/ENSG00000149970/ENSG00000107864/ENSG00000173406/ENSG00000113758/ENSG00000136279/ENSG00000187323/ENSG00000133083/ENSG00000149091/ENSG00000132535…	83
GO:0099060	integral component of postsynaptic specialization membrane	24/3072	78/21916	0.00011079	0.00847024	0.00770669	ENSG00000165379/ENSG00000164742/ENSG00000040731/ENSG00000168539/ENSG00000158258/ENSG00000139182/ENSG00000187323/ENSG00000135333/ENSG00000178568/ENSG00000022355/ENSG00000109158/ENSG00000145864/ENSG00000155511/ENSG00000152208/ENSG00000157219/ENSG00000156564/ENSG00000173621/ENSG00000148948/ENSG00000198739/ENSG00000169760/ENSG00000169992/ENSG00000146938/ENSG00000178235/ENSG00000121871	24
GO:0045178	basal part of cell	66/3072	301/21916	0.000119133	0.00847024	0.00770669	ENSG00000150672/ENSG00000145362/ENSG00000151150/ENSG00000167580/ENSG00000163539/ENSG00000160801/ENSG00000135502/ENSG00000092068/ENSG00000125257/ENSG00000196581/ENSG00000198796/ENSG00000029534/ENSG00000240583/ENSG00000143153/ENSG00000069849/ENSG00000165240/ENSG00000123191/ENSG00000063180/ENSG00000183128/ENSG00000147044/ENSG00000161649/ENSG00000174059/ENSG00000133019/ENSG00000163347/ENSG00000013297…	66
GO:0098685	Schaffer collateral - CA1 synapse	26/3072	88/21916	0.0001239	0.00847024	0.00770669	ENSG00000159842/ENSG00000164742/ENSG00000131016/ENSG00000175866/ENSG00000186716/ENSG00000147044/ENSG00000168539/ENSG00000187323/ENSG00000047579/ENSG00000135333/ENSG00000121853/ENSG00000152822/ENSG00000124313/ENSG00000156564/ENSG00000148948/ENSG00000277586/ENSG00000162631/ENSG00000104368/ENSG00000067606/ENSG00000011275/ENSG00000161681/ENSG00000168610/ENSG00000166900/ENSG00000008056/ENSG00000102003…	26
GO:0099055	integral component of postsynaptic membrane	34/3072	129/21916	0.000155584	0.00974995	0.00887103	ENSG00000102468/ENSG00000165379/ENSG00000118257/ENSG00000164742/ENSG00000120907/ENSG00000040731/ENSG00000168539/ENSG00000158258/ENSG00000139182/ENSG00000187323/ENSG00000135333/ENSG00000178568/ENSG00000022355/ENSG00000109158/ENSG00000145864/ENSG00000155511/ENSG00000152208/ENSG00000198822/ENSG00000166736/ENSG00000157219/ENSG00000156564/ENSG00000173621/ENSG00000148948/ENSG00000198739/ENSG00000169760…	34
GO:0032279	asymmetric synapse	76/3072	364/21916	0.000200566	0.0108	0.00982642	ENSG00000150672/ENSG00000144711/ENSG00000165379/ENSG00000136754/ENSG00000164742/ENSG00000185046/ENSG00000006740/ENSG00000131089/ENSG00000165240/ENSG00000175866/ENSG00000186716/ENSG00000168539/ENSG00000080644/ENSG00000158258/ENSG00000139182/ENSG00000149970/ENSG00000107864/ENSG00000173406/ENSG00000113758/ENSG00000136279/ENSG00000187323/ENSG00000133083/ENSG00000149091/ENSG00000132535/ENSG00000198010…	76
GO:0098948	intrinsic component of postsynaptic specialization membrane	24/3072	81/21916	0.000211686	0.0108	0.00982642	ENSG00000165379/ENSG00000164742/ENSG00000040731/ENSG00000168539/ENSG00000158258/ENSG00000139182/ENSG00000187323/ENSG00000135333/ENSG00000178568/ENSG00000022355/ENSG00000109158/ENSG00000145864/ENSG00000155511/ENSG00000152208/ENSG00000157219/ENSG00000156564/ENSG00000173621/ENSG00000148948/ENSG00000198739/ENSG00000169760/ENSG00000169992/ENSG00000146938/ENSG00000178235/ENSG00000121871	24
GO:0014069	postsynaptic density	75/3072	359/21916	0.000215912	0.0108	0.00982642	ENSG00000150672/ENSG00000144711/ENSG00000165379/ENSG00000136754/ENSG00000164742/ENSG00000185046/ENSG00000006740/ENSG00000131089/ENSG00000165240/ENSG00000175866/ENSG00000186716/ENSG00000168539/ENSG00000080644/ENSG00000158258/ENSG00000139182/ENSG00000149970/ENSG00000107864/ENSG00000173406/ENSG00000113758/ENSG00000136279/ENSG00000187323/ENSG00000133083/ENSG00000149091/ENSG00000132535/ENSG00000198010…	75
GO:0099699	integral component of synaptic membrane	40/3072	163/21916	0.000229787	0.0108	0.00982642	ENSG00000102468/ENSG00000165379/ENSG00000118257/ENSG00000164742/ENSG00000120907/ENSG00000117362/ENSG00000040731/ENSG00000168539/ENSG00000158258/ENSG00000139182/ENSG00000187323/ENSG00000135333/ENSG00000178568/ENSG00000022355/ENSG00000109158/ENSG00000145864/ENSG00000182256/ENSG00000121853/ENSG00000155511/ENSG00000152208/ENSG00000198822/ENSG00000135312/ENSG00000166736/ENSG00000157219/ENSG00000156564…	40
GO:0062023	collagen-containing extracellular matrix	91/3072	455/21916	0.000246758	0.0109154	0.00993142	ENSG00000168477/ENSG00000057593/ENSG00000163638/ENSG00000101144/ENSG00000164318/ENSG00000066468/ENSG00000101680/ENSG00000012171/ENSG00000145423/ENSG00000137573/ENSG00000114251/ENSG00000087085/ENSG00000135744/ENSG00000154188/ENSG00000091879/ENSG00000136859/ENSG00000197043/ENSG00000138279/ENSG00000173369/ENSG00000147044/ENSG00000091986/ENSG00000142871/ENSG00000163815/ENSG00000060718/ENSG00000187955…	91
GO:0043596	nuclear replication fork	12/3072	29/21916	0.000285628	0.0110818	0.0100828	ENSG00000065328/ENSG00000132646/ENSG00000062822/ENSG00000077514/ENSG00000175482/ENSG00000198056/ENSG00000153147/ENSG00000163104/ENSG00000138375/ENSG00000111602/ENSG00000213689/ENSG00000122515	12
GO:0045177	apical part of cell	94/3072	475/21916	0.000288606	0.0110818	0.0100828	ENSG00000113448/ENSG00000145362/ENSG00000167580/ENSG00000186009/ENSG00000168502/ENSG00000100503/ENSG00000160801/ENSG00000168065/ENSG00000092068/ENSG00000023839/ENSG00000125257/ENSG00000132744/ENSG00000196581/ENSG00000131620/ENSG00000240583/ENSG00000143153/ENSG00000069849/ENSG00000182220/ENSG00000165240/ENSG00000130303/ENSG00000161649/ENSG00000174059/ENSG00000074276/ENSG00000171365/ENSG00000163347…	94
GO:0098984	neuron to neuron synapse	80/3072	392/21916	0.00029635	0.0110818	0.0100828	ENSG00000150672/ENSG00000144711/ENSG00000165379/ENSG00000136754/ENSG00000164742/ENSG00000185046/ENSG00000006740/ENSG00000131089/ENSG00000165240/ENSG00000175866/ENSG00000186716/ENSG00000104327/ENSG00000168539/ENSG00000080644/ENSG00000158258/ENSG00000139182/ENSG00000149970/ENSG00000107864/ENSG00000173406/ENSG00000113758/ENSG00000136279/ENSG00000187323/ENSG00000133083/ENSG00000149091/ENSG00000132535…	80
GO:0009925	basal plasma membrane	61/3072	282/21916	0.000309464	0.0110818	0.0100828	ENSG00000150672/ENSG00000145362/ENSG00000151150/ENSG00000167580/ENSG00000160801/ENSG00000135502/ENSG00000092068/ENSG00000125257/ENSG00000196581/ENSG00000198796/ENSG00000029534/ENSG00000240583/ENSG00000143153/ENSG00000069849/ENSG00000165240/ENSG00000123191/ENSG00000063180/ENSG00000183128/ENSG00000147044/ENSG00000161649/ENSG00000174059/ENSG00000133019/ENSG00000163347/ENSG00000148842/ENSG00000154309…	61
GO:0098936	intrinsic component of postsynaptic membrane	34/3072	134/21916	0.000338489	0.0115702	0.0105272	ENSG00000102468/ENSG00000165379/ENSG00000118257/ENSG00000164742/ENSG00000120907/ENSG00000040731/ENSG00000168539/ENSG00000158258/ENSG00000139182/ENSG00000187323/ENSG00000135333/ENSG00000178568/ENSG00000022355/ENSG00000109158/ENSG00000145864/ENSG00000155511/ENSG00000152208/ENSG00000198822/ENSG00000166736/ENSG00000157219/ENSG00000156564/ENSG00000173621/ENSG00000148948/ENSG00000198739/ENSG00000169760…	34
GO:0043256	laminin complex	7/3072	12/21916	0.000437117	0.0142918	0.0130035	ENSG00000101680/ENSG00000053747/ENSG00000172037/ENSG00000196878/ENSG00000058085/ENSG00000074527/ENSG00000162631	7
GO:0016324	apical plasma membrane	81/3072	406/21916	0.000565952	0.0177332	0.0161346	ENSG00000113448/ENSG00000145362/ENSG00000167580/ENSG00000186009/ENSG00000168502/ENSG00000160801/ENSG00000168065/ENSG00000092068/ENSG00000023839/ENSG00000125257/ENSG00000132744/ENSG00000196581/ENSG00000131620/ENSG00000240583/ENSG00000143153/ENSG00000069849/ENSG00000182220/ENSG00000165240/ENSG00000130303/ENSG00000161649/ENSG00000174059/ENSG00000074276/ENSG00000163347/ENSG00000143387/ENSG00000135047…	81
GO:0099240	intrinsic component of synaptic membrane	41/3072	176/21916	0.000612994	0.0184388	0.0167767	ENSG00000102468/ENSG00000165379/ENSG00000118257/ENSG00000164742/ENSG00000120907/ENSG00000117362/ENSG00000040731/ENSG00000168539/ENSG00000158258/ENSG00000139182/ENSG00000187323/ENSG00000135333/ENSG00000178568/ENSG00000022355/ENSG00000109158/ENSG00000145864/ENSG00000182256/ENSG00000121853/ENSG00000155511/ENSG00000152208/ENSG00000198822/ENSG00000135312/ENSG00000166736/ENSG00000157219/ENSG00000156564…	41
GO:0016323	basolateral plasma membrane	55/3072	256/21916	0.000704041	0.020124	0.0183099	ENSG00000150672/ENSG00000145362/ENSG00000151150/ENSG00000167580/ENSG00000160801/ENSG00000135502/ENSG00000092068/ENSG00000125257/ENSG00000196581/ENSG00000198796/ENSG00000029534/ENSG00000240583/ENSG00000143153/ENSG00000069849/ENSG00000165240/ENSG00000123191/ENSG00000063180/ENSG00000183128/ENSG00000147044/ENSG00000161649/ENSG00000133019/ENSG00000163347/ENSG00000148842/ENSG00000154309/ENSG00000159023…	55
GO:0099061	integral component of postsynaptic density membrane	16/3072	49/21916	0.000722538	0.020124	0.0183099	ENSG00000165379/ENSG00000164742/ENSG00000168539/ENSG00000158258/ENSG00000139182/ENSG00000187323/ENSG00000135333/ENSG00000178568/ENSG00000155511/ENSG00000152208/ENSG00000156564/ENSG00000173621/ENSG00000148948/ENSG00000198739/ENSG00000178235/ENSG00000121871	16
GO:0099634	postsynaptic specialization membrane	32/3072	129/21916	0.000757924	0.0203557	0.0185207	ENSG00000150672/ENSG00000165379/ENSG00000164742/ENSG00000040731/ENSG00000168539/ENSG00000158258/ENSG00000139182/ENSG00000149970/ENSG00000187323/ENSG00000132535/ENSG00000135333/ENSG00000178568/ENSG00000022355/ENSG00000109158/ENSG00000145864/ENSG00000155511/ENSG00000152208/ENSG00000161509/ENSG00000152822/ENSG00000109971/ENSG00000157219/ENSG00000156564/ENSG00000173621/ENSG00000148948/ENSG00000198739…	32
GO:0030427	site of polarized growth	43/3072	193/21916	0.00120425	0.0310766	0.0282752	ENSG00000099625/ENSG00000162374/ENSG00000159217/ENSG00000100503/ENSG00000182606/ENSG00000136754/ENSG00000166313/ENSG00000163697/ENSG00000111229/ENSG00000167654/ENSG00000072832/ENSG00000113758/ENSG00000136279/ENSG00000100697/ENSG00000079805/ENSG00000116641/ENSG00000113657/ENSG00000171587/ENSG00000047579/ENSG00000146425/ENSG00000131558/ENSG00000149557/ENSG00000129682/ENSG00000196924/ENSG00000102081…	43
GO:0005874	microtubule	89/3072	466/21916	0.00130796	0.0310766	0.0282752	ENSG00000141556/ENSG00000069424/ENSG00000151746/ENSG00000163539/ENSG00000197102/ENSG00000167216/ENSG00000125337/ENSG00000140859/ENSG00000212916/ENSG00000129422/ENSG00000134369/ENSG00000100503/ENSG00000184640/ENSG00000134982/ENSG00000062725/ENSG00000146376/ENSG00000105146/ENSG00000175866/ENSG00000102409/ENSG00000130559/ENSG00000118200/ENSG00000154429/ENSG00000156261/ENSG00000138778/ENSG00000151849…	89
GO:0005604	basement membrane	25/3072	96/21916	0.00131505	0.0310766	0.0282752	ENSG00000164318/ENSG00000101680/ENSG00000087085/ENSG00000147044/ENSG00000091986/ENSG00000204291/ENSG00000182871/ENSG00000187498/ENSG00000134871/ENSG00000102678/ENSG00000159166/ENSG00000053747/ENSG00000172037/ENSG00000196878/ENSG00000058085/ENSG00000106780/ENSG00000087303/ENSG00000065320/ENSG00000074527/ENSG00000142233/ENSG00000162631/ENSG00000105894/ENSG00000132386/ENSG00000112562/ENSG00000120708	25
GO:0005657	replication fork	18/3072	61/21916	0.00132241	0.0310766	0.0282752	ENSG00000113916/ENSG00000065328/ENSG00000132646/ENSG00000062822/ENSG00000077514/ENSG00000175482/ENSG00000198056/ENSG00000182185/ENSG00000185379/ENSG00000147231/ENSG00000153147/ENSG00000163104/ENSG00000138375/ENSG00000111602/ENSG00000213689/ENSG00000276043/ENSG00000126215/ENSG00000122515	18
GO:0099146	intrinsic component of postsynaptic density membrane	16/3072	52/21916	0.00148054	0.0337384	0.030697	ENSG00000165379/ENSG00000164742/ENSG00000168539/ENSG00000158258/ENSG00000139182/ENSG00000187323/ENSG00000135333/ENSG00000178568/ENSG00000155511/ENSG00000152208/ENSG00000156564/ENSG00000173621/ENSG00000148948/ENSG00000198739/ENSG00000178235/ENSG00000121871	16
GO:0090575	RNA polymerase II transcription regulator complex	42/3072	190/21916	0.00159926	0.0353718	0.0321832	ENSG00000204231/ENSG00000166949/ENSG00000196628/ENSG00000101126/ENSG00000100325/ENSG00000116128/ENSG00000095794/ENSG00000105392/ENSG00000112242/ENSG00000169016/ENSG00000160973/ENSG00000136574/ENSG00000242441/ENSG00000140307/ENSG00000272047/ENSG00000137309/ENSG00000170689/ENSG00000068001/ENSG00000155229/ENSG00000020426/ENSG00000162992/ENSG00000066136/ENSG00000183072/ENSG00000170485/ENSG00000116833…	42
GO:0044304	main axon	20/3072	73/21916	0.00200264	0.042679	0.0388317	ENSG00000150672/ENSG00000069424/ENSG00000151150/ENSG00000197971/ENSG00000134369/ENSG00000029534/ENSG00000166313/ENSG00000187094/ENSG00000147571/ENSG00000145708/ENSG00000132535/ENSG00000082397/ENSG00000169282/ENSG00000033122/ENSG00000091129/ENSG00000148498/ENSG00000185008/ENSG00000110436/ENSG00000115306/ENSG00000028137	20
GO:0005925	focal adhesion	90/3072	479/21916	0.00204314	0.042679	0.0388317	ENSG00000102606/ENSG00000163539/ENSG00000141738/ENSG00000106683/ENSG00000124222/ENSG00000130402/ENSG00000131016/ENSG00000170017/ENSG00000179593/ENSG00000197043/ENSG00000128805/ENSG00000138639/ENSG00000140691/ENSG00000111229/ENSG00000088280/ENSG00000137936/ENSG00000014216/ENSG00000162909/ENSG00000147044/ENSG00000121691/ENSG00000102181/ENSG00000130176/ENSG00000172725/ENSG00000110880/ENSG00000159176…	90
