# Supplementary material for: Smoking Suppresses the Therapeutic Potential of Adipose Stem Cells in Crohn’s Disease Patients through Epigenetic Changes
Source: Cells. 2023 Mar 27;12(7):1021. doi: 10.3390/cells12071021 (PMC10093550; doi:10.3390/cells12071021)
Supplement: Supplementary file 1 [file cells-12-01021-s001.zip › Supplementary Excel S4.xlsx]

## Sheet: Hypomethylated
CpG	SMOKER_vs_NON_SMOKER	pval	FDR	chr	pos	Relation_to_Island	UCSC_RefGene_Group	UCSC_RefGene_Accession	UCSC_RefGene_Name	ENTREZID	ENSEMBL
cg25766247	-3.07126	4.87287e-06	0.0254472	chr8	59714165	OpenSea
cg13332538	-2.84393	6.26602e-05	0.0499283	chr4	4858482	Island
cg05420790	-2.83524	4.93215e-07	0.0226091	chr12	54379757	Island	1stExon	NM_017409	HOXC10	3226	ENSG00000180818
cg05420790	-2.83524	4.93215e-07	0.0226091	chr12	54379757	Island	TSS1500	NR_047506	HOXC-AS3	100874365	ENSG00000251151
cg05408649	-2.79669	1.72023e-06	0.0238167	chr12	54446019	Island	5'UTR	NM_014620	HOXC4	3221	ENSG00000198353
cg11091397	-2.76018	2.77851e-07	0.017513	chr8	35979179	OpenSea
cg19794507	-2.75329	1.38655e-06	0.0238167	chr12	54391285	S_Shore
cg08124910	-2.6644	1.44242e-06	0.0238167	chr17	43339515	Island	Body	NR_024434	LOC100133991	100133991
cg08124910	-2.6644	1.44242e-06	0.0238167	chr17	43339515	Island	TSS200	NR_024435	LOC100133991	100133991
cg08124910	-2.6644	1.44242e-06	0.0238167	chr17	43339515	Island	TSS200	NM_152343	C17orf46	124783	ENSG00000184361
cg19580937	-2.62691	7.29192e-05	0.0514369	chr15	70740429	OpenSea
cg23874561	-2.61335	3.41666e-06	0.0245587	chr4	81124484	Island	Body	NM_001099403	PRDM8	56978	ENSG00000152784
cg23874561	-2.61335	3.41666e-06	0.0245587	chr4	81124484	Island	Body	NM_020226	PRDM8	56978	ENSG00000152784
cg17429374	-2.60474	4.89619e-05	0.0459825	chr11	63889272	S_Shore	Body	NM_014067	MACROD1	28992	ENSG00000133315
cg21493516	-2.55005	3.0142e-06	0.0243866	chr12	54446033	Island	5'UTR	NM_014620	HOXC4	3221	ENSG00000198353
cg01627847	-2.53654	3.96497e-07	0.0208685	chr17	43339512	Island	Body	NR_024434	LOC100133991	100133991
cg01627847	-2.53654	3.96497e-07	0.0208685	chr17	43339512	Island	TSS200	NR_024435	LOC100133991	100133991
cg01627847	-2.53654	3.96497e-07	0.0208685	chr17	43339512	Island	TSS200	NM_152343	C17orf46	124783	ENSG00000184361
cg21898463	-2.51997	3.55128e-06	0.0245587	chr12	54379733	Island	1stExon	NM_017409	HOXC10	3226	ENSG00000180818
cg21898463	-2.51997	3.55128e-06	0.0245587	chr12	54379733	Island	TSS1500	NR_047506	HOXC-AS3	100874365	ENSG00000251151
cg06636831	-2.50457	1.05472e-05	0.0323778	chr3	45077369	Island	Body	NM_003278	CLEC3B	7123	ENSG00000163815
cg08053137	-2.48938	9.38726e-07	0.0238167	chr12	54385436	N_Shelf	TSS200	NR_029617	MIR196A2	406973	ENSG00000207924
cg16663155	-2.45351	1.77948e-05	0.0367043	chr11	61911154	OpenSea	Body	NM_020238	INCENP	3619	ENSG00000149503
cg16663155	-2.45351	1.77948e-05	0.0367043	chr11	61911154	OpenSea	Body	NM_001040694	INCENP	3619	ENSG00000149503
cg20340739	-2.3463	4.89524e-06	0.0254472	chr12	54380150	S_Shore	TSS1500	NR_047506	HOXC-AS3	100874365	ENSG00000251151
cg20340739	-2.3463	4.89524e-06	0.0254472	chr12	54380150	S_Shore	Body	NM_017409	HOXC10	3226	ENSG00000180818
cg02009895	-2.29783	1.62431e-06	0.0238167	chr12	54380101	Island	Body	NM_017409	HOXC10	3226	ENSG00000180818
cg15140902	-2.28102	7.84816e-05	0.0514828	chr6	21667815	S_Shore	Body	NR_015410	FLJ22536	401237
cg20817902	-2.28062	1.90402e-08	0.00533612	chr4	81124121	Island	Body	NM_001099403	PRDM8	56978	ENSG00000152784
cg20817902	-2.28062	1.90402e-08	0.00533612	chr4	81124121	Island	Body	NM_020226	PRDM8	56978	ENSG00000152784
cg10662314	-2.21325	6.36034e-06	0.0282426	chr12	54384666	N_Shelf	TSS1500	NR_029617	MIR196A2	406973	ENSG00000207924
cg01838917	-2.20818	3.3187e-06	0.0245587	chr5	134901336	OpenSea
cg06967452	-2.16382	9.19061e-05	0.0518051	chr8	37246355	OpenSea	Body	NR_031672	MIR1268A	100302233	ENSG00000221641
cg19274890	-2.16035	5.18781e-05	0.0464145	chr7	153584042	Island	TSS200	NM_001039350	DPP6	1804	ENSG00000130226
cg17669581	-2.14465	8.46374e-05	0.0516209	chr4	54968251	S_Shore
cg05956380	-2.1063	7.34668e-05	0.0514369	chr8	42350016	OpenSea	5'UTR	NM_001257180	SLC20A2	6575	ENSG00000168575
cg05956380	-2.1063	7.34668e-05	0.0514369	chr8	42350016	OpenSea	5'UTR	NM_001257181	SLC20A2	6575	ENSG00000168575
cg05956380	-2.1063	7.34668e-05	0.0514369	chr8	42350016	OpenSea	5'UTR	NM_006749	SLC20A2	6575	ENSG00000168575
cg25444339	-2.09295	2.52461e-06	0.0238167	chr7	75194698	OpenSea	Body	NM_005338	HIP1	3092	ENSG00000127946
cg04786142	-2.09058	1.4823e-05	0.0346922	chr1	234908381	OpenSea
cg19013399	-2.08529	1.46889e-05	0.0346922	chr5	159191650	OpenSea
cg18124949	-2.07848	8.60749e-05	0.0517394	chr3	159338884	OpenSea	Body	NM_001197114	IQCJ-SCHIP1	100505385	ENSG00000283154
cg18124949	-2.07848	8.60749e-05	0.0517394	chr3	159338884	OpenSea	Body	NM_001197113	IQCJ-SCHIP1	100505385	ENSG00000283154
cg18124949	-2.07848	8.60749e-05	0.0517394	chr3	159338884	OpenSea	Body	NM_014575	SCHIP1	29970	ENSG00000151967
cg18124949	-2.07848	8.60749e-05	0.0517394	chr3	159338884	OpenSea	Body	NM_014575	SCHIP1	29970	ENSG00000283154
cg18124949	-2.07848	8.60749e-05	0.0517394	chr3	159338884	OpenSea	Body	NM_001197107	SCHIP1	29970	ENSG00000151967
cg18124949	-2.07848	8.60749e-05	0.0517394	chr3	159338884	OpenSea	Body	NM_001197107	SCHIP1	29970	ENSG00000283154
cg18124949	-2.07848	8.60749e-05	0.0517394	chr3	159338884	OpenSea	Body	NM_001197108	SCHIP1	29970	ENSG00000151967
cg18124949	-2.07848	8.60749e-05	0.0517394	chr3	159338884	OpenSea	Body	NM_001197108	SCHIP1	29970	ENSG00000283154
cg12776605	-2.07848	1.80659e-05	0.0367631	chr3	35720394	OpenSea	TSS1500	NM_001267618	ARPP21	10777	ENSG00000172995
cg12776605	-2.07848	1.80659e-05	0.0367631	chr3	35720394	OpenSea	TSS1500	NM_001025068	ARPP21	10777	ENSG00000172995
cg12776605	-2.07848	1.80659e-05	0.0367631	chr3	35720394	OpenSea	TSS1500	NM_001025069	ARPP21	10777	ENSG00000172995
cg12776605	-2.07848	1.80659e-05	0.0367631	chr3	35720394	OpenSea	TSS1500	NM_001267619	ARPP21	10777	ENSG00000172995
cg12776605	-2.07848	1.80659e-05	0.0367631	chr3	35720394	OpenSea	5'UTR	NM_001267616	ARPP21	10777	ENSG00000172995
cg12776605	-2.07848	1.80659e-05	0.0367631	chr3	35720394	OpenSea	5'UTR	NM_001267617	ARPP21	10777	ENSG00000172995
cg12776605	-2.07848	1.80659e-05	0.0367631	chr3	35720394	OpenSea	5'UTR	NM_016300	ARPP21	10777	ENSG00000172995
cg05412137	-2.02425	2.26466e-05	0.0385709	chr12	54384744	N_Shelf	TSS1500	NR_029617	MIR196A2	406973	ENSG00000207924
cg04951371	-1.97172	2.48836e-05	0.0395868	chr2	3317860	Island	Body	NM_003310	TSSC1	7260	ENSG00000032389
cg22112267	-1.96461	4.99729e-05	0.0459825	chr2	66804706	Island
cg16264616	-1.95251	9.11414e-05	0.0517394	chr12	54390824	S_Shore
cg09605287	-1.94975	2.03792e-05	0.0375038	chr12	54390571	S_Shore	TSS200	NR_047505	HOXC-AS2	100874364	ENSG00000250133
cg15061302	-1.93545	2.51254e-05	0.0395868	chr3	156392435	Island	Body	NR_027954	TIPARP-AS1	100287227
cg15061302	-1.93545	2.51254e-05	0.0395868	chr3	156392435	Island	TSS1500	NM_001184717	TIPARP	25976	ENSG00000163659
cg15061302	-1.93545	2.51254e-05	0.0395868	chr3	156392435	Island	1stExon	NM_015508	TIPARP	25976	ENSG00000163659
cg15061302	-1.93545	2.51254e-05	0.0395868	chr3	156392435	Island	5'UTR	NM_015508	TIPARP	25976	ENSG00000163659
cg09320924	-1.92094	3.69577e-06	0.0245587	chr5	80821883	OpenSea	Body	NM_001256736	SSBP2	23635	ENSG00000145687
cg09320924	-1.92094	3.69577e-06	0.0245587	chr5	80821883	OpenSea	Body	NM_001256735	SSBP2	23635	ENSG00000145687
cg09320924	-1.92094	3.69577e-06	0.0245587	chr5	80821883	OpenSea	Body	NM_001256734	SSBP2	23635	ENSG00000145687
cg09320924	-1.92094	3.69577e-06	0.0245587	chr5	80821883	OpenSea	Body	NM_001256733	SSBP2	23635	ENSG00000145687
cg09320924	-1.92094	3.69577e-06	0.0245587	chr5	80821883	OpenSea	Body	NM_001256732	SSBP2	23635	ENSG00000145687
cg09320924	-1.92094	3.69577e-06	0.0245587	chr5	80821883	OpenSea	Body	NM_012446	SSBP2	23635	ENSG00000145687
cg12898442	-1.90688	9.05596e-05	0.0517394	chr11	124616323	Island	3'UTR	NM_001126181	NRGN	4900	ENSG00000154146
cg12898442	-1.90688	9.05596e-05	0.0517394	chr11	124616323	Island	3'UTR	NM_006176	NRGN	4900	ENSG00000154146
cg23736997	-1.8989	7.23051e-06	0.0285213	chr2	217163703	OpenSea	Body	NM_020814	MARCH4	57574	ENSG00000144583
cg02936049	-1.89285	7.46486e-05	0.0514828	chr3	141102599	OpenSea	5'UTR	NM_001080412	ZBTB38	253461	ENSG00000177311
cg21147635	-1.88757	1.18197e-05	0.0327471	chr22	18452721	OpenSea	5'UTR	NM_015241	MICAL3	57553	ENSG00000243156
cg05732832	-1.88142	3.03185e-05	0.0424127	chr4	4868723	Island
cg18675617	-1.88018	4.52209e-05	0.045587	chr2	66807918	N_Shore
cg05870166	-1.87177	4.74515e-05	0.0459252	chr2	144707254	OpenSea	3'UTR	NM_001284233	GTDC1	79712	ENSG00000121964
cg05870166	-1.87177	4.74515e-05	0.0459252	chr2	144707254	OpenSea	Body	NM_001284234	GTDC1	79712	ENSG00000121964
cg05870166	-1.87177	4.74515e-05	0.0459252	chr2	144707254	OpenSea	Body	NM_001284238	GTDC1	79712	ENSG00000121964
cg05870166	-1.87177	4.74515e-05	0.0459252	chr2	144707254	OpenSea	Body	NM_024659	GTDC1	79712	ENSG00000121964
cg05870166	-1.87177	4.74515e-05	0.0459252	chr2	144707254	OpenSea	Body	NM_001164629	GTDC1	79712	ENSG00000121964
cg05870166	-1.87177	4.74515e-05	0.0459252	chr2	144707254	OpenSea	Body	NM_001006636	GTDC1	79712	ENSG00000121964
cg05870166	-1.87177	4.74515e-05	0.0459252	chr2	144707254	OpenSea	Body	NR_110237	LOC101928386	101928386	ENSG00000232377
cg13672200	-1.86938	1.16055e-05	0.0326	chr12	54387530	N_Shore
cg08871011	-1.86245	9.85589e-07	0.0238167	chr16	4986962	Island	Body	NM_002705	PPL	5493	ENSG00000118898
cg07868115	-1.85843	1.28865e-05	0.0336021	chr15	63063085	OpenSea	Body	NM_015059	TLN2	83660	ENSG00000171914
cg12270180	-1.8487	8.98547e-05	0.0517394	chr3	11806486	OpenSea
cg04508078	-1.83676	6.46424e-05	0.0499283	chr22	18396537	OpenSea	5'UTR	NM_015241	MICAL3	57553	ENSG00000243156
cg09053536	-1.83272	4.64107e-05	0.0456278	chr12	115117551	N_Shelf	Body	NM_005996	TBX3	6926	ENSG00000135111
cg09053536	-1.83272	4.64107e-05	0.0456278	chr12	115117551	N_Shelf	Body	NM_016569	TBX3	6926	ENSG00000135111
cg04500324	-1.82625	1.2031e-05	0.0329401	chr15	67289583	OpenSea
cg11734354	-1.80726	7.26996e-06	0.0285213	chr2	47416787	OpenSea
cg08523438	-1.7892	4.54069e-05	0.045587	chr4	38165520	OpenSea
cg17286831	-1.78257	3.80357e-05	0.0438988	chr14	65273399	OpenSea	Body	NM_001024858	SPTB	6710	ENSG00000070182
cg17286831	-1.78257	3.80357e-05	0.0438988	chr14	65273399	OpenSea	Body	NM_000347	SPTB	6710	ENSG00000070182
cg14479837	-1.77948	2.1109e-06	0.0238167	chr12	129128018	OpenSea	Body	NM_001136103	TMEM132C	92293	ENSG00000181234
cg15283062	-1.77363	2.26779e-05	0.0385709	chr12	125348591	Island	TSS200	NM_005505	SCARB1	949	ENSG00000073060
cg15283062	-1.77363	2.26779e-05	0.0385709	chr12	125348591	Island	TSS200	NM_001082959	SCARB1	949	ENSG00000073060
cg20162504	-1.76917	6.19474e-05	0.0499283	chr15	38333949	OpenSea	Body	NR_120330	LOC101928227	101928227	ENSG00000259225
cg07533511	-1.76799	7.81508e-05	0.0514828	chr12	94580931	S_Shore	Body	NM_005761	PLXNC1	10154	ENSG00000136040
cg13154147	-1.75366	1.43208e-05	0.0345612	chr21	36590117	OpenSea
cg23176316	-1.74959	9.24428e-05	0.0519082	chr2	20784406	OpenSea
cg17185622	-1.74182	2.21131e-05	0.0385709	chr8	98103016	OpenSea	Body	NM_016134	PGCP	10404	ENSG00000104324
cg08148853	-1.72375	4.12386e-05	0.0447917	chrX	9935850	OpenSea	1stExon	NM_001195081	CLDN34	100288814	ENSG00000234469
cg14276478	-1.71385	4.00087e-05	0.0445343	chr12	46917741	OpenSea	Body	NR_125379	LOC100288798	100288798
cg14276478	-1.71385	4.00087e-05	0.0445343	chr12	46917741	OpenSea	Body	NR_125380	LOC100288798	100288798
cg14276478	-1.71385	4.00087e-05	0.0445343	chr12	46917741	OpenSea	Body	NR_125378	LOC100288798	100288798
cg14276478	-1.71385	4.00087e-05	0.0445343	chr12	46917741	OpenSea	Body	NR_125377	LOC100288798	100288798
cg14276478	-1.71385	4.00087e-05	0.0445343	chr12	46917741	OpenSea	Body	NR_125381	LOC100288798	100288798
cg12545735	-1.71047	1.4555e-05	0.0346193	chr4	115202687	OpenSea
cg08515640	-1.69954	9.63146e-05	0.0521905	chr1	198412761	OpenSea
cg02100150	-1.69118	8.4622e-05	0.0516209	chr8	128920485	OpenSea	Body	NR_003367	PVT1	5820	ENSG00000249859
cg24275769	-1.68888	2.80549e-05	0.0411722	chr18	22006446	Island	TSS200	NM_018439	IMPACT	55364	ENSG00000154059
cg14742429	-1.68435	6.40208e-05	0.0499283	chr1	236162869	OpenSea	Body	NM_002508	NID1	4811	ENSG00000116962
cg03768744	-1.68234	3.08443e-06	0.0243866	chr5	89939662	OpenSea	Body	NR_003149	ADGRV1	84059	ENSG00000164199
cg03768744	-1.68234	3.08443e-06	0.0243866	chr5	89939662	OpenSea	Body	NM_032119	ADGRV1	84059	ENSG00000164199
cg22693423	-1.67928	2.73042e-05	0.0411722	chr6	1024891	OpenSea	Body	NR_027116	LOC285768	285768	ENSG00000286785
cg22693423	-1.67928	2.73042e-05	0.0411722	chr6	1024891	OpenSea	Body	NR_027115	LOC285768	285768	ENSG00000286785
cg10379346	-1.66872	5.11389e-05	0.04632	chr10	123355239	N_Shore	5'UTR	NM_001144915	FGFR2	2263	ENSG00000066468
cg10379346	-1.66872	5.11389e-05	0.04632	chr10	123355239	N_Shore	5'UTR	NM_001144919	FGFR2	2263	ENSG00000066468
cg10379346	-1.66872	5.11389e-05	0.04632	chr10	123355239	N_Shore	5'UTR	NM_001144917	FGFR2	2263	ENSG00000066468
cg10379346	-1.66872	5.11389e-05	0.04632	chr10	123355239	N_Shore	5'UTR	NM_000141	FGFR2	2263	ENSG00000066468
cg10379346	-1.66872	5.11389e-05	0.04632	chr10	123355239	N_Shore	5'UTR	NM_022970	FGFR2	2263	ENSG00000066468
cg10379346	-1.66872	5.11389e-05	0.04632	chr10	123355239	N_Shore	5'UTR	NM_001144918	FGFR2	2263	ENSG00000066468
cg10379346	-1.66872	5.11389e-05	0.04632	chr10	123355239	N_Shore	TSS1500	NM_001144916	FGFR2	2263	ENSG00000066468
cg10379346	-1.66872	5.11389e-05	0.04632	chr10	123355239	N_Shore	Body	NR_073009	FGFR2	2263	ENSG00000066468
cg12721429	-1.66382	5.01038e-06	0.02578	chr10	45220304	OpenSea
cg02965295	-1.65101	1.69061e-05	0.0360168	chr2	197944718	OpenSea	Body	NM_153697	ANKRD44	91526	ENSG00000065413
cg05164634	-1.64723	1.60862e-05	0.0354206	chr12	49366538	S_Shelf	TSS1500	NM_003394	WNT10B	7480	ENSG00000169884
cg13609089	-1.63863	3.46891e-05	0.0438988	chr6	10610691	OpenSea	Body	NM_145655	GCNT2	2651	ENSG00000111846
cg13609089	-1.63863	3.46891e-05	0.0438988	chr6	10610691	OpenSea	Body	NM_145655	GCNT2	2651	ENSG00000285222
cg13609089	-1.63863	3.46891e-05	0.0438988	chr6	10610691	OpenSea	Body	NM_145649	GCNT2	2651	ENSG00000111846
cg13609089	-1.63863	3.46891e-05	0.0438988	chr6	10610691	OpenSea	Body	NM_145649	GCNT2	2651	ENSG00000285222
cg13609089	-1.63863	3.46891e-05	0.0438988	chr6	10610691	OpenSea	Body	NM_001491	GCNT2	2651	ENSG00000111846
cg13609089	-1.63863	3.46891e-05	0.0438988	chr6	10610691	OpenSea	Body	NM_001491	GCNT2	2651	ENSG00000285222
cg16400495	-1.63668	3.40629e-05	0.0438988	chr12	54385625	N_Shelf	Body	NR_029617	MIR196A2	406973	ENSG00000207924
cg05269153	-1.62324	1.01992e-05	0.032064	chr11	8787026	OpenSea	5'UTR	NM_213618	ST5	6764	ENSG00000166444
cg05269153	-1.62324	1.01992e-05	0.032064	chr11	8787026	OpenSea	5'UTR	NM_139157	ST5	6764	ENSG00000166444
cg05269153	-1.62324	1.01992e-05	0.032064	chr11	8787026	OpenSea	5'UTR	NM_005418	ST5	6764	ENSG00000166444
cg07630816	-1.62001	1.5672e-05	0.0353272	chr4	23549992	OpenSea
cg12214034	-1.61991	4.03705e-06	0.0245587	chr8	13210721	OpenSea	Body	NM_182643	DLC1	10395	ENSG00000164741
cg12214034	-1.61991	4.03705e-06	0.0245587	chr8	13210721	OpenSea	Body	NM_182643	DLC1	10395	ENSG00000288673
cg12214034	-1.61991	4.03705e-06	0.0245587	chr8	13210721	OpenSea	Body	NM_024767	DLC1	10395	ENSG00000164741
cg12214034	-1.61991	4.03705e-06	0.0245587	chr8	13210721	OpenSea	Body	NM_024767	DLC1	10395	ENSG00000288673
cg27542016	-1.61964	6.11369e-05	0.0498628	chr9	2622147	Island	5'UTR	NM_003383	VLDLR	7436	ENSG00000147852
cg27542016	-1.61964	6.11369e-05	0.0498628	chr9	2622147	Island	5'UTR	NM_001018056	VLDLR	7436	ENSG00000147852
cg27542016	-1.61964	6.11369e-05	0.0498628	chr9	2622147	Island	1stExon	NM_003383	VLDLR	7436	ENSG00000147852
cg27542016	-1.61964	6.11369e-05	0.0498628	chr9	2622147	Island	1stExon	NM_001018056	VLDLR	7436	ENSG00000147852
cg27542016	-1.61964	6.11369e-05	0.0498628	chr9	2622147	Island	Body	NR_015375	VLDLR-AS1	401491	ENSG00000236404
cg21650241	-1.61622	8.37947e-05	0.0516209	chr3	185539248	N_Shore	TSS1500	NM_001291874	IGF2BP2	10644	ENSG00000073792
cg21650241	-1.61622	8.37947e-05	0.0516209	chr3	185539248	N_Shore	TSS1500	NM_001291872	IGF2BP2	10644	ENSG00000073792
cg21650241	-1.61622	8.37947e-05	0.0516209	chr3	185539248	N_Shore	TSS1500	NM_001291873	IGF2BP2	10644	ENSG00000073792
cg21650241	-1.61622	8.37947e-05	0.0516209	chr3	185539248	N_Shore	TSS1500	NM_001291875	IGF2BP2	10644	ENSG00000073792
cg21650241	-1.61622	8.37947e-05	0.0516209	chr3	185539248	N_Shore	Body	NM_001007225	IGF2BP2	10644	ENSG00000073792
cg21650241	-1.61622	8.37947e-05	0.0516209	chr3	185539248	N_Shore	Body	NM_001291869	IGF2BP2	10644	ENSG00000073792
cg21650241	-1.61622	8.37947e-05	0.0516209	chr3	185539248	N_Shore	Body	NM_006548	IGF2BP2	10644	ENSG00000073792
cg20351668	-1.60184	8.07143e-05	0.0514828	chr2	206628737	OpenSea	Body	NM_201267	NRP2	8828	ENSG00000118257
cg20351668	-1.60184	8.07143e-05	0.0514828	chr2	206628737	OpenSea	Body	NM_018534	NRP2	8828	ENSG00000118257
cg20351668	-1.60184	8.07143e-05	0.0514828	chr2	206628737	OpenSea	Body	NM_201279	NRP2	8828	ENSG00000118257
cg20351668	-1.60184	8.07143e-05	0.0514828	chr2	206628737	OpenSea	Body	NM_201266	NRP2	8828	ENSG00000118257
cg20351668	-1.60184	8.07143e-05	0.0514828	chr2	206628737	OpenSea	Body	NM_003872	NRP2	8828	ENSG00000118257
cg23905556	-1.58641	8.78213e-05	0.0517394	chr12	92976846	OpenSea
cg12176793	-1.58572	3.70558e-05	0.0438988	chr8	90624127	OpenSea
cg12947261	-1.58222	5.29711e-05	0.0469576	chr6	156349624	OpenSea
cg00236305	-1.57791	1.95465e-05	0.0369146	chr2	1796076	OpenSea	Body	NM_015025	MYT1L	23040	ENSG00000186487
cg13695746	-1.57149	7.98025e-05	0.0514828	chr10	13002582	OpenSea	Body	NM_031455	CCDC3	83643	ENSG00000151468
cg07734358	-1.56959	4.92065e-05	0.0459825	chr22	47370132	Island	Body	NM_014346	TBC1D22A	25771	ENSG00000054611
cg17734698	-1.56176	6.49183e-05	0.0499283	chr12	129127968	OpenSea	Body	NM_001136103	TMEM132C	92293	ENSG00000181234
cg01818215	-1.55808	9.11013e-05	0.0517394	chr18	59997175	S_Shelf	Body	NM_001270949	TNFRSF11A	8792	ENSG00000141655
cg01818215	-1.55808	9.11013e-05	0.0517394	chr18	59997175	S_Shelf	Body	NM_001278268	TNFRSF11A	8792	ENSG00000141655
cg01818215	-1.55808	9.11013e-05	0.0517394	chr18	59997175	S_Shelf	Body	NM_003839	TNFRSF11A	8792	ENSG00000141655
cg01818215	-1.55808	9.11013e-05	0.0517394	chr18	59997175	S_Shelf	Body	NM_001270951	TNFRSF11A	8792	ENSG00000141655
cg01818215	-1.55808	9.11013e-05	0.0517394	chr18	59997175	S_Shelf	Body	NM_001270950	TNFRSF11A	8792	ENSG00000141655
cg03749813	-1.55606	5.48322e-05	0.0475441	chr15	57724526	OpenSea	5'UTR	NM_001252335	CGNL1	84952	ENSG00000128849
cg03749813	-1.55606	5.48322e-05	0.0475441	chr15	57724526	OpenSea	5'UTR	NM_032866	CGNL1	84952	ENSG00000128849
cg01641792	-1.55214	6.62839e-05	0.0499283	chr19	10572362	OpenSea	Body	NM_006202	PDE4A	5141	ENSG00000065989
cg01641792	-1.55214	6.62839e-05	0.0499283	chr19	10572362	OpenSea	Body	NM_001111308	PDE4A	5141	ENSG00000065989
cg01641792	-1.55214	6.62839e-05	0.0499283	chr19	10572362	OpenSea	Body	NM_001111307	PDE4A	5141	ENSG00000065989
cg01641792	-1.55214	6.62839e-05	0.0499283	chr19	10572362	OpenSea	Body	NM_001111309	PDE4A	5141	ENSG00000065989
cg20202463	-1.54771	4.43675e-05	0.045587	chr12	5795302	OpenSea	Body	NM_001278596	ANO2	57101	ENSG00000047617
cg20202463	-1.54771	4.43675e-05	0.045587	chr12	5795302	OpenSea	Body	NM_001278597	ANO2	57101	ENSG00000047617
cg13891546	-1.54548	9.05508e-05	0.0517394	chr5	116497772	OpenSea
cg27589058	-1.53839	2.02148e-05	0.0373376	chr20	45804311	OpenSea	Body	NM_172110	EYA2	2139	ENSG00000064655
cg27589058	-1.53839	2.02148e-05	0.0373376	chr20	45804311	OpenSea	Body	NM_005244	EYA2	2139	ENSG00000064655
cg02927821	-1.53636	9.69666e-06	0.0313427	chr17	39216677	OpenSea	TSS1500	NM_001165252	LOC730755	730755	ENSG00000212724
cg02927821	-1.53636	9.69666e-06	0.0313427	chr17	39216677	OpenSea	TSS1500	NM_001165252	LOC730755	730755	ENSG00000262862
cg15218498	-1.53135	7.91884e-05	0.0514828	chr14	39417485	OpenSea
cg08544453	-1.52959	9.4821e-06	0.0310861	chr1	11361900	OpenSea
cg15334372	-1.52605	4.48677e-05	0.045587	chr16	73096889	Island
cg05740106	-1.52561	2.71037e-05	0.0410416	chr6	169273346	OpenSea
cg09025856	-1.52556	5.03476e-05	0.0460669	chr5	11062606	OpenSea	Body	NM_001288717	CTNND2	1501	ENSG00000169862
cg09025856	-1.52556	5.03476e-05	0.0460669	chr5	11062606	OpenSea	Body	NR_109988	CTNND2	1501	ENSG00000169862
cg09025856	-1.52556	5.03476e-05	0.0460669	chr5	11062606	OpenSea	Body	NM_001288716	CTNND2	1501	ENSG00000169862
cg09025856	-1.52556	5.03476e-05	0.0460669	chr5	11062606	OpenSea	Body	NM_001288715	CTNND2	1501	ENSG00000169862
cg09025856	-1.52556	5.03476e-05	0.0460669	chr5	11062606	OpenSea	Body	NM_001332	CTNND2	1501	ENSG00000169862
cg21461387	-1.52448	2.99615e-05	0.0422007	chr6	33217271	Island
cg05103044	-1.52214	8.21556e-05	0.0515253	chr6	132713009	OpenSea	Body	NM_015529	MOXD1	26002	ENSG00000079931
cg01246617	-1.49893	4.51852e-05	0.045587	chr5	53751493	OpenSea	5'UTR	NM_006308	HSPB3	8988	ENSG00000169271
cg01246617	-1.49893	4.51852e-05	0.045587	chr5	53751493	OpenSea	1stExon	NM_006308	HSPB3	8988	ENSG00000169271
cg20934096	-1.4898	2.85899e-05	0.0411722	chr7	1117418	N_Shelf	Body	NM_001134395	C7orf50	84310	ENSG00000146540
cg20934096	-1.4898	2.85899e-05	0.0411722	chr7	1117418	N_Shelf	Body	NM_032350	C7orf50	84310	ENSG00000146540
cg20934096	-1.4898	2.85899e-05	0.0411722	chr7	1117418	N_Shelf	Body	NM_001134396	C7orf50	84310	ENSG00000146540
cg03048083	-1.48558	3.18611e-06	0.0243866	chr17	43339497	Island	Body	NR_024434	LOC100133991	100133991
cg03048083	-1.48558	3.18611e-06	0.0243866	chr17	43339497	Island	TSS200	NR_024435	LOC100133991	100133991
cg03048083	-1.48558	3.18611e-06	0.0243866	chr17	43339497	Island	TSS200	NM_152343	C17orf46	124783	ENSG00000184361
cg09575532	-1.48492	4.1999e-05	0.0449632	chr3	43221763	OpenSea
cg18818610	-1.46453	2.37427e-05	0.0391243	chr2	1799881	N_Shore	Body	NM_001303052	MYT1L	23040	ENSG00000186487
cg18818610	-1.46453	2.37427e-05	0.0391243	chr2	1799881	N_Shore	Body	NM_015025	MYT1L	23040	ENSG00000186487
cg01183244	-1.45856	8.0368e-05	0.0514828	chr3	55502488	N_Shore	3'UTR	NM_003392	WNT5A	7474	ENSG00000114251
cg08144675	-1.45822	5.07387e-05	0.0461418	chr16	73097057	Island
cg12300731	-1.45143	5.48768e-05	0.0475441	chr11	101207708	OpenSea
cg05059566	-1.45048	8.99726e-05	0.0517394	chr4	81118647	N_Shore	TSS200	NM_001099403	PRDM8	56978	ENSG00000152784
cg05059566	-1.45048	8.99726e-05	0.0517394	chr4	81118647	N_Shore	5'UTR	NM_020226	PRDM8	56978	ENSG00000152784
cg16694072	-1.44528	3.56083e-05	0.0438988	chr8	17815054	OpenSea	ExonBnd	NM_006197	PCM1	5108	ENSG00000078674
cg16694072	-1.44528	3.56083e-05	0.0438988	chr8	17815054	OpenSea	Body	NM_006197	PCM1	5108	ENSG00000078674
cg04067992	-1.43816	7.42215e-05	0.0514369	chr13	110965424	N_Shore	Body	NM_001846	COL4A2	1284	ENSG00000134871
cg24526103	-1.43452	5.74236e-06	0.0275765	chr13	110433784	N_Shore	Body	NM_003749	IRS2	8660	ENSG00000185950
cg08870093	-1.43409	2.95729e-05	0.04177	chr5	2388038	OpenSea
cg16646459	-1.43072	1.99578e-05	0.037241	chr12	111650887	OpenSea	Body	NM_015267	CUX2	23316	ENSG00000111249
cg20405062	-1.42784	3.62448e-05	0.0438988	chr2	30589477	OpenSea
cg04345787	-1.42598	6.88705e-05	0.0504796	chr7	56130216	N_Shore	Body	NM_001762	CCT6A	908	ENSG00000146731
cg04345787	-1.42598	6.88705e-05	0.0504796	chr7	56130216	N_Shore	Body	NM_001009186	CCT6A	908	ENSG00000146731
cg10027236	-1.42567	7.69673e-05	0.0514828	chr18	45522439	OpenSea
cg17473341	-1.42403	5.53736e-05	0.0477294	chr12	95940370	N_Shore	5'UTR	NM_001278393	USP44	84101	ENSG00000136014
cg17473341	-1.42403	5.53736e-05	0.0477294	chr12	95940370	N_Shore	5'UTR	NM_001042403	USP44	84101	ENSG00000136014
cg17473341	-1.42403	5.53736e-05	0.0477294	chr12	95940370	N_Shore	5'UTR	NM_032147	USP44	84101	ENSG00000136014
cg14015441	-1.42401	8.10499e-05	0.0514828	chr8	105479318	Island	TSS200	NM_001385	DPYS	1807	ENSG00000147647
cg25052156	-1.42358	8.69438e-05	0.0517394	chr10	123355454	N_Shore	5'UTR	NM_000141	FGFR2	2263	ENSG00000066468
cg25052156	-1.42358	8.69438e-05	0.0517394	chr10	123355454	N_Shore	5'UTR	NM_001144917	FGFR2	2263	ENSG00000066468
cg25052156	-1.42358	8.69438e-05	0.0517394	chr10	123355454	N_Shore	5'UTR	NM_022970	FGFR2	2263	ENSG00000066468
cg25052156	-1.42358	8.69438e-05	0.0517394	chr10	123355454	N_Shore	5'UTR	NM_001144918	FGFR2	2263	ENSG00000066468
cg25052156	-1.42358	8.69438e-05	0.0517394	chr10	123355454	N_Shore	5'UTR	NM_001144919	FGFR2	2263	ENSG00000066468
cg25052156	-1.42358	8.69438e-05	0.0517394	chr10	123355454	N_Shore	5'UTR	NM_001144915	FGFR2	2263	ENSG00000066468
cg24384437	-1.42282	8.53939e-05	0.0517394	chr15	57724857	OpenSea	5'UTR	NM_032866	CGNL1	84952	ENSG00000128849
cg18462822	-1.42229	4.21459e-05	0.0450249	chr13	22451777	OpenSea	Body	NR_047040	LINC00424	100874182	ENSG00000226722
cg16629111	-1.41921	9.00414e-05	0.0517394	chr5	7773086	OpenSea	Body	NM_020546	ADCY2	108	ENSG00000078295
cg04990190	-1.41399	9.57143e-06	0.0311375	chr16	73096894	Island
cg12948240	-1.41398	4.06245e-05	0.0447278	chr2	237150840	OpenSea	Body	NM_212556	ASB18	401036	ENSG00000182177
cg02807040	-1.41385	3.94606e-05	0.044119	chr4	100943813	OpenSea	Body	NR_125923	LOC256880	256880
cg06353486	-1.41182	7.59065e-05	0.0514828	chr1	3427479	Island	Body	NM_001409	MEGF6	1953	ENSG00000162591
cg19857227	-1.41008	9.65341e-05	0.0521905	chr14	95240340	Island
cg00921058	-1.40902	5.50294e-06	0.0266809	chr15	102100258	OpenSea
cg15806314	-1.40698	9.53999e-05	0.0521905	chr20	18897464	OpenSea
cg07669776	-1.40627	9.13947e-05	0.0517394	chr13	110975691	OpenSea	Body	NM_001846	COL4A2	1284	ENSG00000134871
cg08189801	-1.40337	9.78408e-05	0.0521905	chr17	46670610	Island	Body	NR_033203	LOC404266	404266	ENSG00000233101
cg08189801	-1.40337	9.78408e-05	0.0521905	chr17	46670610	Island	Body	NR_033204	LOC404266	404266	ENSG00000233101
cg08189801	-1.40337	9.78408e-05	0.0521905	chr17	46670610	Island	Body	NR_033201	LOC404266	404266	ENSG00000233101
cg08189801	-1.40337	9.78408e-05	0.0521905	chr17	46670610	Island	1stExon	NM_002147	HOXB5	3215	ENSG00000120075
cg08189801	-1.40337	9.78408e-05	0.0521905	chr17	46670610	Island	Body	NR_033202	LOC404266	404266	ENSG00000233101
cg09057681	-1.39487	2.39041e-06	0.0238167	chr2	97018830	OpenSea	Body	NM_001281711	NCAPH	23397	ENSG00000121152
cg09057681	-1.39487	2.39041e-06	0.0238167	chr2	97018830	OpenSea	Body	NM_001281710	NCAPH	23397	ENSG00000121152
cg09057681	-1.39487	2.39041e-06	0.0238167	chr2	97018830	OpenSea	Body	NM_015341	NCAPH	23397	ENSG00000121152
cg09057681	-1.39487	2.39041e-06	0.0238167	chr2	97018830	OpenSea	Body	NM_001281712	NCAPH	23397	ENSG00000121152
cg00024494	-1.38949	5.37754e-06	0.026326	chr16	73096842	N_Shore
cg24991874	-1.38349	3.56773e-06	0.0245587	chr11	130066626	OpenSea	Body	NM_021978	ST14	6768	ENSG00000149418
cg27018912	-1.38177	1.13317e-05	0.0324653	chr4	81118602	Island	TSS200	NM_001099403	PRDM8	56978	ENSG00000152784
cg27018912	-1.38177	1.13317e-05	0.0324653	chr4	81118602	Island	5'UTR	NM_020226	PRDM8	56978	ENSG00000152784
cg09495173	-1.38129	8.43406e-05	0.0516209	chr2	72562399	OpenSea	Body	NM_015189	EXOC6B	23233	ENSG00000144036
cg15244621	-1.36649	6.68643e-05	0.0499283	chr2	109839740	OpenSea	Body	NM_001099289	SH3RF3	344558	ENSG00000172985
cg07396450	-1.36055	1.70177e-05	0.0360548	chr13	88329453	Island	Body	NM_015567	SLITRK5	26050	ENSG00000165300
cg15534579	-1.3566	6.2226e-05	0.0499283	chr16	75598952	N_Shore	TSS1500	NM_007285	GABARAPL2	11345	ENSG00000034713
cg19760004	-1.34738	9.53387e-05	0.0521905	chr1	24468457	OpenSea	Body	NM_021258	IL22RA1	58985	ENSG00000142677
cg22072332	-1.34552	4.18856e-06	0.0245587	chr11	26589397	OpenSea	5'UTR	NM_145650	MUC15	143662	ENSG00000169550
cg22072332	-1.34552	4.18856e-06	0.0245587	chr11	26589397	OpenSea	5'UTR	NM_001135092	MUC15	143662	ENSG00000169550
cg22072332	-1.34552	4.18856e-06	0.0245587	chr11	26589397	OpenSea	5'UTR	NM_001135091	MUC15	143662	ENSG00000169550
cg22072332	-1.34552	4.18856e-06	0.0245587	chr11	26589397	OpenSea	Body	NM_031418	ANO3	63982	ENSG00000134343
cg07314988	-1.34336	7.20499e-05	0.0512772	chr11	289774	Island	5'UTR	NM_025092	ATHL1	80162	ENSG00000142102
cg01569664	-1.33616	9.42671e-05	0.0521905	chr13	110434016	N_Shore	Body	NM_003749	IRS2	8660	ENSG00000185950
cg12123470	-1.33559	7.31982e-05	0.0514369	chr10	7215341	S_Shore	Body	NM_001029880	SFMBT2	57713	ENSG00000198879
cg23493018	-1.33475	5.1369e-06	0.0258972	chr8	37309823	OpenSea
cg11332163	-1.33173	4.79986e-05	0.0459258	chr4	54975593	Island
cg01934587	-1.32711	6.44246e-05	0.0499283	chr1	205198673	S_Shore	Body	NM_014858	TMCC2	9911	ENSG00000133069
cg01934587	-1.32711	6.44246e-05	0.0499283	chr1	205198673	S_Shore	5'UTR	NM_001242925	TMCC2	9911	ENSG00000133069
cg06359375	-1.32401	3.54132e-05	0.0438988	chr22	26875804	N_Shelf	TSS200	NM_152841	HPS4	89781	ENSG00000100099
cg06359375	-1.32401	3.54132e-05	0.0438988	chr22	26875804	N_Shelf	TSS200	NR_073136	HPS4	89781	ENSG00000100099
cg06359375	-1.32401	3.54132e-05	0.0438988	chr22	26875804	N_Shelf	Body	NR_073135	HPS4	89781	ENSG00000100099
cg06359375	-1.32401	3.54132e-05	0.0438988	chr22	26875804	N_Shelf	Body	NM_022081	HPS4	89781	ENSG00000100099
cg13551613	-1.31509	3.86597e-05	0.0438988	chr7	15707149	OpenSea	Body	NM_005924	MEOX2	4223	ENSG00000106511
cg14310964	-1.315	3.84278e-05	0.0438988	chr5	29462580	OpenSea
cg11159919	-1.31006	3.37942e-05	0.0438988	chr19	35613882	N_Shore	Body	NM_001136007	FXYD3	5349	ENSG00000089356
cg11159919	-1.31006	3.37942e-05	0.0438988	chr19	35613882	N_Shore	Body	NM_001136007	FXYD3	5349	ENSG00000285526
cg11159919	-1.31006	3.37942e-05	0.0438988	chr19	35613882	N_Shore	Body	NM_001136011	FXYD3	5349	ENSG00000089356
cg11159919	-1.31006	3.37942e-05	0.0438988	chr19	35613882	N_Shore	Body	NM_001136011	FXYD3	5349	ENSG00000285526
cg11159919	-1.31006	3.37942e-05	0.0438988	chr19	35613882	N_Shore	Body	NM_001136012	FXYD3	5349	ENSG00000089356
cg11159919	-1.31006	3.37942e-05	0.0438988	chr19	35613882	N_Shore	Body	NM_001136012	FXYD3	5349	ENSG00000285526
cg11159919	-1.31006	3.37942e-05	0.0438988	chr19	35613882	N_Shore	Body	NM_021910	FXYD3	5349	ENSG00000089356
cg11159919	-1.31006	3.37942e-05	0.0438988	chr19	35613882	N_Shore	Body	NM_021910	FXYD3	5349	ENSG00000285526
cg11159919	-1.31006	3.37942e-05	0.0438988	chr19	35613882	N_Shore	Body	NM_005971	FXYD3	5349	ENSG00000089356
cg11159919	-1.31006	3.37942e-05	0.0438988	chr19	35613882	N_Shore	Body	NM_005971	FXYD3	5349	ENSG00000285526
cg11159919	-1.31006	3.37942e-05	0.0438988	chr19	35613882	N_Shore	3'UTR	NM_001136008	FXYD3	5349	ENSG00000089356
cg11159919	-1.31006	3.37942e-05	0.0438988	chr19	35613882	N_Shore	3'UTR	NM_001136008	FXYD3	5349	ENSG00000285526
cg17763553	-1.30525	4.57605e-06	0.024583	chr8	18953483	OpenSea
cg04810795	-1.29131	8.3312e-05	0.0516209	chr7	73493863	OpenSea
cg11715719	-1.28654	7.57885e-05	0.0514828	chr2	1799886	N_Shore	Body	NM_001303052	MYT1L	23040	ENSG00000186487
cg11715719	-1.28654	7.57885e-05	0.0514828	chr2	1799886	N_Shore	Body	NM_015025	MYT1L	23040	ENSG00000186487
cg20876525	-1.2813	5.8358e-05	0.0485587	chr6	169273382	OpenSea
cg09588215	-1.28067	1.07851e-05	0.0323778	chr15	39579839	OpenSea
cg13481192	-1.27944	1.90114e-05	0.0367631	chr1	17180456	OpenSea
cg06567521	-1.27206	9.74803e-05	0.0521905	chr6	12593099	OpenSea
cg02611934	-1.26501	3.33719e-05	0.0438988	chr13	88329407	Island	Body	NM_015567	SLITRK5	26050	ENSG00000165300
cg27019731	-1.26384	4.94949e-05	0.0459825	chr10	134800662	N_Shelf
cg12138695	-1.25978	7.72371e-05	0.0514828	chr3	149160934	OpenSea
cg19090437	-1.2579	1.50758e-05	0.0347956	chr4	38080799	OpenSea	Body	NM_015173	TBC1D1	23216	ENSG00000065882
cg24307481	-1.25674	1.86241e-05	0.0367631	chr6	66205307	OpenSea	5'UTR	NM_198283	EYS	346007	ENSG00000188107
cg24307481	-1.25674	1.86241e-05	0.0367631	chr6	66205307	OpenSea	5'UTR	NM_001292009	EYS	346007	ENSG00000188107
cg24307481	-1.25674	1.86241e-05	0.0367631	chr6	66205307	OpenSea	5'UTR	NM_001142800	EYS	346007	ENSG00000188107
cg24307481	-1.25674	1.86241e-05	0.0367631	chr6	66205307	OpenSea	5'UTR	NM_001142801	EYS	346007	ENSG00000188107
cg03142900	-1.2566	1.87916e-05	0.0367631	chr10	120264472	OpenSea
cg19135352	-1.24636	8.02325e-05	0.0514828	chr17	16176891	OpenSea	Body	NM_004278	PIGL	9487	ENSG00000108474
cg20249584	-1.23661	6.61676e-05	0.0499283	chr1	233462803	N_Shore	TSS1500	NM_032435	KIAA1804	84451	ENSG00000143674
cg26299084	-1.23487	5.81378e-05	0.0485587	chr4	81118588	Island	5'UTR	NM_020226	PRDM8	56978	ENSG00000152784
cg26299084	-1.23487	5.81378e-05	0.0485587	chr4	81118588	Island	TSS200	NM_001099403	PRDM8	56978	ENSG00000152784
cg27386323	-1.23442	4.53571e-05	0.045587	chr13	25747257	S_Shore	TSS1500	NM_199138	AMER2	219287	ENSG00000165566
cg27386323	-1.23442	4.53571e-05	0.045587	chr13	25747257	S_Shore	TSS1500	NM_152704	AMER2	219287	ENSG00000165566
cg27386323	-1.23442	4.53571e-05	0.045587	chr13	25747257	S_Shore	Body	NR_120428	LINC00463	101928922	ENSG00000234056
cg24537315	-1.23059	3.63357e-05	0.0438988	chr9	28811202	OpenSea	5'UTR	NM_001258282	LINGO2	158038	ENSG00000174482
cg09352815	-1.23045	4.54244e-05	0.045587	chr10	130337228	N_Shore
cg22445940	-1.22164	1.71954e-05	0.0361277	chr20	57224919	Island	TSS1500	NM_001134773	STX16	8675	ENSG00000124222
cg22445940	-1.22164	1.71954e-05	0.0361277	chr20	57224919	Island	TSS1500	NM_003763	STX16	8675	ENSG00000124222
cg22445940	-1.22164	1.71954e-05	0.0361277	chr20	57224919	Island	TSS1500	NM_001134772	STX16	8675	ENSG00000124222
cg22445940	-1.22164	1.71954e-05	0.0361277	chr20	57224919	Island	TSS1500	NM_001001433	STX16	8675	ENSG00000124222
cg24626581	-1.214	4.72033e-05	0.0457729	chr12	49366536	S_Shelf	TSS1500	NM_003394	WNT10B	7480	ENSG00000169884
cg20416296	-1.21313	1.13232e-05	0.0324653	chr9	124360395	N_Shore	Body	NM_032552	DAB2IP	153090	ENSG00000136848
cg04131010	-1.21309	3.31191e-05	0.0438988	chr7	2287330	OpenSea	Body	NM_198948	NUDT1	4521	ENSG00000106268
cg04131010	-1.21309	3.31191e-05	0.0438988	chr7	2287330	OpenSea	Body	NM_002452	NUDT1	4521	ENSG00000106268
cg04131010	-1.21309	3.31191e-05	0.0438988	chr7	2287330	OpenSea	Body	NM_198952	NUDT1	4521	ENSG00000106268
cg04131010	-1.21309	3.31191e-05	0.0438988	chr7	2287330	OpenSea	Body	NM_198950	NUDT1	4521	ENSG00000106268
cg04131010	-1.21309	3.31191e-05	0.0438988	chr7	2287330	OpenSea	Body	NM_198954	NUDT1	4521	ENSG00000106268
cg04131010	-1.21309	3.31191e-05	0.0438988	chr7	2287330	OpenSea	Body	NM_198953	NUDT1	4521	ENSG00000106268
cg04131010	-1.21309	3.31191e-05	0.0438988	chr7	2287330	OpenSea	Body	NM_198949	NUDT1	4521	ENSG00000106268
cg12999414	-1.20682	5.20072e-05	0.0464145	chr2	66799816	N_Shelf	TSS1500	NR_110156	LOC100507073	100507073	ENSG00000232046
cg12999414	-1.20682	5.20072e-05	0.0464145	chr2	66799816	N_Shelf	3'UTR	NM_002398	MEIS1	4211	ENSG00000143995
cg15630071	-1.19967	1.37802e-05	0.0340615	chr3	32861318	Island	Body	NM_001039111	TRIM71	131405	ENSG00000206557
cg19309683	-1.1995	3.31463e-05	0.0438988	chr16	73599501	OpenSea
cg07141356	-1.19314	9.60135e-05	0.0521905	chr2	43399031	S_Shore
cg04571415	-1.1926	2.32819e-05	0.0386174	chr17	43509772	Island	5'UTR	NM_174919	ARHGAP27	201176	ENSG00000159314
cg04571415	-1.1926	2.32819e-05	0.0386174	chr17	43509772	Island	5'UTR	NM_174919	ARHGAP27	201176	ENSG00000276907
cg04571415	-1.1926	2.32819e-05	0.0386174	chr17	43509772	Island	5'UTR	NM_174919	ARHGAP27	201176	ENSG00000276836
cg03782157	-1.19135	3.43934e-05	0.0438988	chr16	54970302	Island
cg05405040	-1.18907	4.65386e-05	0.0456278	chr9	85019188	OpenSea
cg20038591	-1.18614	9.42352e-07	0.0238167	chr10	119306659	S_Shore	Body	NM_001165924	EMX2	2018	ENSG00000170370
cg20038591	-1.18614	9.42352e-07	0.0238167	chr10	119306659	S_Shore	Body	NM_004098	EMX2	2018	ENSG00000170370
cg20521668	-1.18495	4.09108e-05	0.0447482	chr4	4869169	Island
cg05245416	-1.18475	8.34165e-05	0.0516209	chr2	105087010	OpenSea	Body	NR_015399	LOC150568	150568	ENSG00000235597
cg26053832	-1.17911	7.57942e-06	0.0285213	chr16	54971600	Island
cg17820586	-1.17787	9.81172e-05	0.0521905	chr11	12181422	OpenSea	5'UTR	NM_001282668	MICAL2	9645	ENSG00000133816
cg17820586	-1.17787	9.81172e-05	0.0521905	chr11	12181422	OpenSea	5'UTR	NM_014632	MICAL2	9645	ENSG00000133816
cg17820586	-1.17787	9.81172e-05	0.0521905	chr11	12181422	OpenSea	5'UTR	NM_001282663	MICAL2	9645	ENSG00000133816
cg17820586	-1.17787	9.81172e-05	0.0521905	chr11	12181422	OpenSea	5'UTR	NM_001282664	MICAL2	9645	ENSG00000133816
cg17820586	-1.17787	9.81172e-05	0.0521905	chr11	12181422	OpenSea	5'UTR	NM_001282665	MICAL2	9645	ENSG00000133816
cg01329245	-1.174	7.63431e-05	0.0514828	chr16	79303284	OpenSea
cg13681940	-1.17287	7.88229e-05	0.0514828	chr6	134159412	S_Shore	Body	NR_027029	MGC34034
cg13681940	-1.17287	7.88229e-05	0.0514828	chr6	134159412	S_Shore	Body	NR_027030	MGC34034	154089
cg16642791	-1.16972	1.16373e-05	0.0326	chr16	54966471	Island	Body	NM_005853	IRX5	10265	ENSG00000176842
cg00029521	-1.15702	9.06591e-05	0.0517394	chr6	39272634	S_Shore	Body	NM_031460	KCNK17	89822	ENSG00000124780
cg00029521	-1.15702	9.06591e-05	0.0517394	chr6	39272634	S_Shore	Body	NM_001135111	KCNK17	89822	ENSG00000124780
cg25775957	-1.15673	2.55092e-05	0.0395868	chr17	64236351	OpenSea
cg20186982	-1.15015	4.82691e-05	0.0459825	chr21	29021064	OpenSea	Body	NR_049807	MIR5009	100846993	ENSG00000264796
cg02540827	-1.14988	2.26417e-05	0.0385709	chr2	201221975	OpenSea	5'UTR	NM_015535	SPATS2L	26010	ENSG00000196141
cg02540827	-1.14988	2.26417e-05	0.0385709	chr2	201221975	OpenSea	5'UTR	NM_001100424	SPATS2L	26010	ENSG00000196141
cg02540827	-1.14988	2.26417e-05	0.0385709	chr2	201221975	OpenSea	5'UTR	NM_001100423	SPATS2L	26010	ENSG00000196141
cg02540827	-1.14988	2.26417e-05	0.0385709	chr2	201221975	OpenSea	5'UTR	NM_001100422	SPATS2L	26010	ENSG00000196141
cg02858159	-1.14284	3.50772e-05	0.0438988	chr10	7202900	OpenSea
cg14384748	-1.13727	3.84087e-05	0.0438988	chr12	132859951	Island	Body	NM_001122636	GALNT9	50614	ENSG00000182870
cg14384748	-1.13727	3.84087e-05	0.0438988	chr12	132859951	Island	Body	NM_001122636	GALNT9	50614	ENSG00000288490
cg16106182	-1.13705	1.06375e-05	0.0323778	chr11	37146120	OpenSea
cg17136123	-1.13592	8.885e-05	0.0517394	chr7	4034886	OpenSea	Body	NM_152744	SDK1	221935	ENSG00000146555
cg13744172	-1.13563	5.12582e-05	0.04632	chr16	54972647	Island
cg26557925	-1.13132	5.4579e-05	0.0475441	chr12	3702404	OpenSea	3'UTR	NM_019854	PRMT8	56341	ENSG00000111218
cg22359528	-1.13034	4.79454e-05	0.0459258	chr15	80786992	OpenSea	Body	NM_014862	ARNT2	9915	ENSG00000172379
cg21209876	-1.12616	3.70504e-05	0.0438988	chr14	23447792	N_Shelf	Body	NM_032876	JUB	84962	ENSG00000129474
cg21209876	-1.12616	3.70504e-05	0.0438988	chr14	23447792	N_Shelf	TSS1500	NM_198086	JUB	84962	ENSG00000129474
cg13534095	-1.11461	4.18949e-05	0.0449472	chr4	12926002	OpenSea
cg01810319	-1.1145	2.48501e-05	0.0395868	chr8	51475618	OpenSea	Body	NM_018967	SNTG1	54212	ENSG00000147481
cg01810319	-1.1145	2.48501e-05	0.0395868	chr8	51475618	OpenSea	Body	NM_001287814	SNTG1	54212	ENSG00000147481
cg01810319	-1.1145	2.48501e-05	0.0395868	chr8	51475618	OpenSea	Body	NM_001287813	SNTG1	54212	ENSG00000147481
cg21317164	-1.10821	3.14493e-05	0.0428596	chr1	24427425	OpenSea	Body	NM_152372	MYOM3	127294	ENSG00000142661
cg03425785	-1.10316	4.61463e-05	0.0456253	chr20	62221387	Island	3'UTR	NM_012384	GMEB2	26205	ENSG00000101216
cg22360050	-1.08802	9.66674e-05	0.0521905	chr6	169104899	OpenSea
cg25664938	-1.08603	9.37459e-05	0.0521905	chr3	119030023	OpenSea	Body	NM_020754	CDGAP	57514	ENSG00000031081
cg04308793	-1.08157	6.63817e-05	0.0499283	chr20	30931516	OpenSea
cg05126044	-1.07992	1.78462e-06	0.0238167	chr10	19498475	OpenSea	Body	NM_001142308	MALRD1	340895	ENSG00000204740
cg06757951	-1.07978	6.12195e-05	0.0498628	chr16	78970471	OpenSea	Body	NM_016373	WWOX	51741	ENSG00000186153
cg06757951	-1.07978	6.12195e-05	0.0498628	chr16	78970471	OpenSea	Body	NM_001291997	WWOX	51741	ENSG00000186153
cg22459664	-1.07944	1.91487e-05	0.0367631	chr7	139929764	N_Shore
cg25933341	-1.07808	9.42135e-05	0.0521905	chr3	181429661	N_Shore	Body	NR_004053	SOX2OT	347689	ENSG00000242808
cg25933341	-1.07808	9.42135e-05	0.0521905	chr3	181429661	N_Shore	TSS200	NM_003106	SOX2	6657	ENSG00000181449
cg25044484	-1.07679	1.40606e-05	0.0342509	chr11	112329924	OpenSea
cg08621447	-1.07446	1.29434e-06	0.0238167	chr2	203036147	Island
cg06102340	-1.07251	1.82975e-05	0.0367631	chr6	8859229	OpenSea
cg05455279	-1.0602	4.94906e-05	0.0459825	chr3	97109009	OpenSea	Body	NM_001080448	EPHA6	285220	ENSG00000080224
cg01495918	-1.05186	3.73703e-05	0.0438988	chr2	204605898	OpenSea
cg22932685	-1.0511	1.65325e-05	0.0357784	chr8	11664134	N_Shore	TSS1500	NM_001287749	FDFT1	2222	ENSG00000079459
cg22932685	-1.0511	1.65325e-05	0.0357784	chr8	11664134	N_Shore	TSS1500	NM_001287749	FDFT1	2222	ENSG00000284967
cg22932685	-1.0511	1.65325e-05	0.0357784	chr8	11664134	N_Shore	5'UTR	NM_001287744	FDFT1	2222	ENSG00000079459
cg22932685	-1.0511	1.65325e-05	0.0357784	chr8	11664134	N_Shore	5'UTR	NM_001287744	FDFT1	2222	ENSG00000284967
cg22932685	-1.0511	1.65325e-05	0.0357784	chr8	11664134	N_Shore	5'UTR	NM_001287745	FDFT1	2222	ENSG00000079459
cg22932685	-1.0511	1.65325e-05	0.0357784	chr8	11664134	N_Shore	5'UTR	NM_001287745	FDFT1	2222	ENSG00000284967
cg22932685	-1.0511	1.65325e-05	0.0357784	chr8	11664134	N_Shore	Body	NM_001287743	FDFT1	2222	ENSG00000079459
cg22932685	-1.0511	1.65325e-05	0.0357784	chr8	11664134	N_Shore	Body	NM_001287743	FDFT1	2222	ENSG00000284967
cg22932685	-1.0511	1.65325e-05	0.0357784	chr8	11664134	N_Shore	Body	NM_001287742	FDFT1	2222	ENSG00000079459
cg22932685	-1.0511	1.65325e-05	0.0357784	chr8	11664134	N_Shore	Body	NM_001287742	FDFT1	2222	ENSG00000284967
cg22932685	-1.0511	1.65325e-05	0.0357784	chr8	11664134	N_Shore	Body	NM_001287756	FDFT1	2222	ENSG00000079459
cg22932685	-1.0511	1.65325e-05	0.0357784	chr8	11664134	N_Shore	Body	NM_001287756	FDFT1	2222	ENSG00000284967
cg22932685	-1.0511	1.65325e-05	0.0357784	chr8	11664134	N_Shore	Body	NM_004462	FDFT1	2222	ENSG00000079459
cg22932685	-1.0511	1.65325e-05	0.0357784	chr8	11664134	N_Shore	Body	NM_004462	FDFT1	2222	ENSG00000284967
cg22932685	-1.0511	1.65325e-05	0.0357784	chr8	11664134	N_Shore	5'UTR	NM_001287747	FDFT1	2222	ENSG00000079459
cg22932685	-1.0511	1.65325e-05	0.0357784	chr8	11664134	N_Shore	5'UTR	NM_001287747	FDFT1	2222	ENSG00000284967
cg22932685	-1.0511	1.65325e-05	0.0357784	chr8	11664134	N_Shore	5'UTR	NM_001287748	FDFT1	2222	ENSG00000079459
cg22932685	-1.0511	1.65325e-05	0.0357784	chr8	11664134	N_Shore	5'UTR	NM_001287748	FDFT1	2222	ENSG00000284967
cg03180625	-1.05001	6.66819e-05	0.0499283	chr10	92049021	OpenSea
cg09835220	-1.0498	9.97668e-05	0.0521905	chr14	34021446	OpenSea	Body	NM_001164749	NPAS3	64067	ENSG00000151322
cg09835220	-1.0498	9.97668e-05	0.0521905	chr14	34021446	OpenSea	Body	NM_173159	NPAS3	64067	ENSG00000151322
cg09835220	-1.0498	9.97668e-05	0.0521905	chr14	34021446	OpenSea	Body	NM_001165893	NPAS3	64067	ENSG00000151322
cg09835220	-1.0498	9.97668e-05	0.0521905	chr14	34021446	OpenSea	Body	NM_022123	NPAS3	64067	ENSG00000151322
cg14779401	-1.04967	8.17575e-05	0.0514828	chr1	206299388	OpenSea
cg04109941	-1.04693	7.16517e-05	0.0512479	chr7	4153732	Island	Body	NM_152744	SDK1	221935	ENSG00000146555
cg09007811	-1.04018	7.88544e-05	0.0514828	chr3	191217102	OpenSea	Body	NR_120606	LINCR-0002	103344926
cg11080135	-1.03892	1.83692e-05	0.0367631	chr5	70817687	OpenSea	Body	NM_018429	BDP1	55814	ENSG00000145734
cg11080135	-1.03892	1.83692e-05	0.0367631	chr5	70817687	OpenSea	Body	NM_018429	BDP1	55814	ENSG00000274803
cg11080135	-1.03892	1.83692e-05	0.0367631	chr5	70817687	OpenSea	Body	NM_018429	BDP1	55814	ENSG00000273873
cg02720618	-1.02631	3.63174e-05	0.0438988	chr6	152129791	S_Shore	Body	NM_001122740	ESR1	2099	ENSG00000091831
cg02720618	-1.02631	3.63174e-05	0.0438988	chr6	152129791	S_Shore	Body	NM_001122741	ESR1	2099	ENSG00000091831
cg02720618	-1.02631	3.63174e-05	0.0438988	chr6	152129791	S_Shore	Body	NM_000125	ESR1	2099	ENSG00000091831
cg02720618	-1.02631	3.63174e-05	0.0438988	chr6	152129791	S_Shore	Body	NM_001122742	ESR1	2099	ENSG00000091831
cg07024439	-1.0219	9.64295e-05	0.0521905	chr4	168230286	OpenSea
cg05800738	-1.01618	1.77163e-05	0.0367043	chr11	126936632	OpenSea	TSS1500	NR_120578	LOC101929473	101929473	ENSG00000255087
cg14454907	-0.995832	9.854e-05	0.0521905	chr2	177022285	N_Shelf
cg05468843	-0.993901	2.12432e-06	0.0238167	chr11	117857990	S_Shore	Body	NR_026691	IL10RA	3587	ENSG00000110324
cg05468843	-0.993901	2.12432e-06	0.0238167	chr11	117857990	S_Shore	Body	NM_001558	IL10RA	3587	ENSG00000110324
cg20419623	-0.992499	5.01024e-05	0.0460177	chr20	48599526	Island	5'UTR	NM_005985	SNAI1	6615	ENSG00000124216
cg20419623	-0.992499	5.01024e-05	0.0460177	chr20	48599526	Island	1stExon	NM_005985	SNAI1	6615	ENSG00000124216
cg22738219	-0.991289	3.52842e-05	0.0438988	chr10	13043313	Island	1stExon	NM_031455	CCDC3	83643	ENSG00000151468
cg08637661	-0.990099	4.97613e-05	0.0459825	chr21	33650086	N_Shore	Body	NM_018944	MIS18A	54069	ENSG00000159055
cg20679581	-0.983894	2.88988e-05	0.0412805	chr8	10222777	OpenSea	Body	NM_001135671	MSRA	4482	ENSG00000175806
cg20679581	-0.983894	2.88988e-05	0.0412805	chr8	10222777	OpenSea	Body	NM_001135671	MSRA	4482	ENSG00000285250
cg20679581	-0.983894	2.88988e-05	0.0412805	chr8	10222777	OpenSea	Body	NM_001135670	MSRA	4482	ENSG00000175806
cg20679581	-0.983894	2.88988e-05	0.0412805	chr8	10222777	OpenSea	Body	NM_001135670	MSRA	4482	ENSG00000285250
cg20679581	-0.983894	2.88988e-05	0.0412805	chr8	10222777	OpenSea	Body	NM_012331	MSRA	4482	ENSG00000175806
cg20679581	-0.983894	2.88988e-05	0.0412805	chr8	10222777	OpenSea	Body	NM_012331	MSRA	4482	ENSG00000285250
cg24109536	-0.956744	4.44092e-06	0.024583	chr3	43232449	OpenSea
cg02132714	-0.953807	7.12506e-05	0.0511371	chr17	46656690	S_Shore	TSS1500	NM_024015	HOXB4	3214	ENSG00000182742
cg13906792	-0.951254	9.00057e-06	0.0305952	chr15	75199810	S_Shore	TSS1500	NM_020447	C15orf17	57184	ENSG00000178761
cg03078363	-0.947982	6.63683e-06	0.0285213	chr12	54408664	Island
cg23201830	-0.938797	4.71934e-05	0.0457729	chr2	228735790	N_Shore	TSS1500	NM_178821	WDR69	164781	ENSG00000123977
cg13455069	-0.937742	3.81141e-05	0.0438988	chr4	7385791	OpenSea	Body	NM_020777	SORCS2	57537	ENSG00000184985
cg02109264	-0.937473	4.98866e-05	0.0459825	chr13	93162949	OpenSea	Body	NM_004466	GPC5	2262	ENSG00000179399
cg00937681	-0.937231	2.06123e-05	0.0377948	chr4	77723304	Island
cg20253551	-0.927529	9.88877e-05	0.0521905	chr6	152129400	Island	Body	NM_001122740	ESR1	2099	ENSG00000091831
cg20253551	-0.927529	9.88877e-05	0.0521905	chr6	152129400	Island	Body	NM_001122741	ESR1	2099	ENSG00000091831
cg20253551	-0.927529	9.88877e-05	0.0521905	chr6	152129400	Island	1stExon	NM_000125	ESR1	2099	ENSG00000091831
cg20253551	-0.927529	9.88877e-05	0.0521905	chr6	152129400	Island	Body	NM_001122742	ESR1	2099	ENSG00000091831
cg20710888	-0.921999	4.72588e-06	0.0250841	chr6	87865238	Island	TSS200	NM_015021	ZNF292	23036	ENSG00000188994
cg20420329	-0.905078	7.65231e-05	0.0514828	chr6	156403576	OpenSea
cg18008037	-0.895695	1.11359e-05	0.0324653	chr7	158272029	OpenSea	Body	NM_002847	PTPRN2	5799	ENSG00000155093
cg18008037	-0.895695	1.11359e-05	0.0324653	chr7	158272029	OpenSea	Body	NM_002847	PTPRN2	5799	ENSG00000282185
cg18008037	-0.895695	1.11359e-05	0.0324653	chr7	158272029	OpenSea	Body	NM_130842	PTPRN2	5799	ENSG00000155093
cg18008037	-0.895695	1.11359e-05	0.0324653	chr7	158272029	OpenSea	Body	NM_130842	PTPRN2	5799	ENSG00000282185
cg18008037	-0.895695	1.11359e-05	0.0324653	chr7	158272029	OpenSea	Body	NM_130843	PTPRN2	5799	ENSG00000155093
cg18008037	-0.895695	1.11359e-05	0.0324653	chr7	158272029	OpenSea	Body	NM_130843	PTPRN2	5799	ENSG00000282185
cg11418477	-0.893028	4.49293e-05	0.045587	chr2	175199741	Island	TSS200	NM_001145250	SP9	100131390	ENSG00000217236
cg23793503	-0.891364	3.82026e-05	0.0438988	chr14	63380935	OpenSea	Body	NM_139318	KCNH5	27133	ENSG00000140015
cg23793503	-0.891364	3.82026e-05	0.0438988	chr14	63380935	OpenSea	Body	NM_172375	KCNH5	27133	ENSG00000140015
cg19291576	-0.886748	5.62269e-05	0.0480541	chr9	969530	Island
cg11662745	-0.880407	7.25006e-06	0.0285213	chr5	146020768	OpenSea	Body	NM_181674	PPP2R2B	5521	ENSG00000156475
cg11662745	-0.880407	7.25006e-06	0.0285213	chr5	146020768	OpenSea	Body	NM_001127381	PPP2R2B
cg11662745	-0.880407	7.25006e-06	0.0285213	chr5	146020768	OpenSea	Body	NM_181677	PPP2R2B	5521	ENSG00000156475
cg11662745	-0.880407	7.25006e-06	0.0285213	chr5	146020768	OpenSea	Body	NM_181676	PPP2R2B	5521	ENSG00000156475
cg11662745	-0.880407	7.25006e-06	0.0285213	chr5	146020768	OpenSea	Body	NM_181675	PPP2R2B	5521	ENSG00000156475
cg11662745	-0.880407	7.25006e-06	0.0285213	chr5	146020768	OpenSea	Body	NM_004576	PPP2R2B
cg11662745	-0.880407	7.25006e-06	0.0285213	chr5	146020768	OpenSea	Body	NM_181678	PPP2R2B	5521	ENSG00000156475
cg08190928	-0.87358	2.26971e-05	0.0385709	chr6	106433985	Island
cg11873492	-0.869219	9.60477e-05	0.0521905	chr4	84140721	OpenSea
cg25708328	-0.868583	9.88103e-05	0.0521905	chr2	177022056	N_Shelf
cg02285263	-0.855212	9.22189e-05	0.051898	chr6	152129749	Island	Body	NM_001122740	ESR1	2099	ENSG00000091831
cg02285263	-0.855212	9.22189e-05	0.051898	chr6	152129749	Island	Body	NM_001122741	ESR1	2099	ENSG00000091831
cg02285263	-0.855212	9.22189e-05	0.051898	chr6	152129749	Island	Body	NM_000125	ESR1	2099	ENSG00000091831
cg02285263	-0.855212	9.22189e-05	0.051898	chr6	152129749	Island	Body	NM_001122742	ESR1	2099	ENSG00000091831
cg08648606	-0.85135	6.35352e-06	0.0282426	chr8	21441570	OpenSea
cg18295758	-0.851149	3.70557e-05	0.0438988	chr5	5279443	OpenSea	Body	NM_139056	ADAMTS16	170690	ENSG00000145536
cg22317764	-0.84908	7.2255e-05	0.0513155	chr10	5644094	OpenSea
cg15221245	-0.844895	5.80137e-05	0.0485587	chr2	60441042	OpenSea
cg14625095	-0.836771	4.07002e-05	0.0447278	chr22	25590936	OpenSea	3'UTR	NM_001145206	KIAA1671	85379	ENSG00000197077
cg08736034	-0.834193	8.08532e-05	0.0514828	chr20	44878490	N_Shore	Body	NM_021248	CDH22	64405	ENSG00000149654
cg10332369	-0.823525	4.46987e-05	0.045587	chr1	166125392	OpenSea	TSS1500	NR_030626	MIR921	100126349	ENSG00000215952
cg10332369	-0.823525	4.46987e-05	0.045587	chr1	166125392	OpenSea	Body	NM_001017961	FAM78B	149297	ENSG00000188859
cg24640320	-0.819283	6.58136e-05	0.0499283	chr17	9082934	OpenSea	TSS1500	NR_110828	LOC101928266	101928266	ENSG00000262966
cg24640320	-0.819283	6.58136e-05	0.0499283	chr17	9082934	OpenSea	Body	NM_004822	NTN1	9423	ENSG00000065320
cg07462184	-0.817747	7.81432e-05	0.0514828	chr6	10248801	OpenSea
cg21800284	-0.814864	3.43864e-05	0.0438988	chr12	115107215	S_Shore
cg26250747	-0.804017	8.16526e-05	0.0514828	chr20	57225100	Island	TSS1500	NM_001001433	STX16	8675	ENSG00000124222
cg26250747	-0.804017	8.16526e-05	0.0514828	chr20	57225100	Island	TSS1500	NM_001134772	STX16	8675	ENSG00000124222
cg26250747	-0.804017	8.16526e-05	0.0514828	chr20	57225100	Island	TSS1500	NM_003763	STX16	8675	ENSG00000124222
cg26250747	-0.804017	8.16526e-05	0.0514828	chr20	57225100	Island	TSS1500	NM_001134773	STX16	8675	ENSG00000124222
cg26250747	-0.804017	8.16526e-05	0.0514828	chr20	57225100	Island	TSS1500	NM_001204868	STX16	8675	ENSG00000124222
cg26250747	-0.804017	8.16526e-05	0.0514828	chr20	57225100	Island	TSS1500	NR_037945	STX16-NPEPL1	100534593	ENSG00000254995
cg26250747	-0.804017	8.16526e-05	0.0514828	chr20	57225100	Island	TSS1500	NR_037943	STX16	8675	ENSG00000124222
cg26250747	-0.804017	8.16526e-05	0.0514828	chr20	57225100	Island	TSS1500	NR_037942	STX16	8675	ENSG00000124222
cg26250747	-0.804017	8.16526e-05	0.0514828	chr20	57225100	Island	TSS1500	NR_037941	STX16	8675	ENSG00000124222
cg02807446	-0.802234	9.06015e-05	0.0517394	chr10	106682909	OpenSea	Body	NM_014978	SORCS3	22986	ENSG00000156395
cg11160054	-0.80163	3.42162e-05	0.0438988	chr8	72460431	Island
cg27513759	-0.800597	6.65148e-05	0.0499283	chr1	79299324	OpenSea
cg00727310	-0.798687	1.4861e-05	0.0346922	chr2	227662704	Island	1stExon	NM_005544	IRS1	3667	ENSG00000169047
cg24206053	-0.793717	1.85517e-05	0.0367631	chr5	139284009	Island	Body	NM_004883	NRG2	9542	ENSG00000158458
cg24206053	-0.793717	1.85517e-05	0.0367631	chr5	139284009	Island	Body	NM_001184935	NRG2	9542	ENSG00000158458
cg24206053	-0.793717	1.85517e-05	0.0367631	chr5	139284009	Island	Body	NM_013983	NRG2	9542	ENSG00000158458
cg24206053	-0.793717	1.85517e-05	0.0367631	chr5	139284009	Island	Body	NM_013982	NRG2	9542	ENSG00000158458
cg24206053	-0.793717	1.85517e-05	0.0367631	chr5	139284009	Island	Body	NM_013981	NRG2	9542	ENSG00000158458
cg12361338	-0.780504	9.00015e-05	0.0517394	chr6	166247968	OpenSea
cg12453014	-0.779627	8.43306e-05	0.0516209	chr5	119801142	Island	5'UTR	NM_016644	PRR16	51334	ENSG00000184838
cg18728493	-0.776103	2.5168e-05	0.0395868	chr3	48264021	OpenSea	TSS1500	NM_004345	CAMP	820	ENSG00000164047
cg25057705	-0.774282	2.53597e-05	0.0395868	chr14	101864631	OpenSea
cg02969706	-0.772968	2.64559e-05	0.0404248	chr2	6072283	OpenSea	TSS1500	NR_026832	LOC150622	150622
cg23676215	-0.772704	8.44554e-05	0.0516209	chr6	165821991	OpenSea	TSS1500	NR_106988	MIR7641-2
cg23676215	-0.772704	8.44554e-05	0.0516209	chr6	165821991	OpenSea	Body	NM_006661	PDE10A	10846	ENSG00000112541
cg23676215	-0.772704	8.44554e-05	0.0516209	chr6	165821991	OpenSea	Body	NM_001130690	PDE10A	10846	ENSG00000112541
cg18560789	-0.762348	8.50176e-06	0.0305952	chr8	37188435	OpenSea	Body	NR_031672	MIR1268A	100302233	ENSG00000221641
cg27452159	-0.75724	3.85422e-05	0.0438988	chr7	18580928	OpenSea	Body	NM_001204144	HDAC9	9734	ENSG00000048052
cg27452159	-0.75724	3.85422e-05	0.0438988	chr7	18580928	OpenSea	Body	NM_014707	HDAC9	9734	ENSG00000048052
cg27452159	-0.75724	3.85422e-05	0.0438988	chr7	18580928	OpenSea	Body	NM_001204146	HDAC9	9734	ENSG00000048052
cg27452159	-0.75724	3.85422e-05	0.0438988	chr7	18580928	OpenSea	Body	NM_001204145	HDAC9	9734	ENSG00000048052
cg27452159	-0.75724	3.85422e-05	0.0438988	chr7	18580928	OpenSea	5'UTR	NM_001204147	HDAC9	9734	ENSG00000048052
cg27452159	-0.75724	3.85422e-05	0.0438988	chr7	18580928	OpenSea	5'UTR	NM_001204148	HDAC9	9734	ENSG00000048052
cg27452159	-0.75724	3.85422e-05	0.0438988	chr7	18580928	OpenSea	Body	NM_178423	HDAC9	9734	ENSG00000048052
cg27452159	-0.75724	3.85422e-05	0.0438988	chr7	18580928	OpenSea	Body	NM_058176	HDAC9	9734	ENSG00000048052
cg27452159	-0.75724	3.85422e-05	0.0438988	chr7	18580928	OpenSea	Body	NM_178425	HDAC9	9734	ENSG00000048052
cg19708201	-0.753878	9.28961e-05	0.0521047	chr1	237996893	OpenSea	3'UTR	NM_001035	RYR2	6262	ENSG00000198626
cg04564681	-0.750531	9.12985e-05	0.0517394	chr1	212809557	OpenSea
cg18773591	-0.749839	3.94571e-06	0.0245587	chr2	51001003	OpenSea	Body	NM_004801	NRXN1	9378	ENSG00000179915
cg18773591	-0.749839	3.94571e-06	0.0245587	chr2	51001003	OpenSea	Body	NM_001135659	NRXN1	9378	ENSG00000179915
cg08153316	-0.746989	1.13151e-05	0.0324653	chr9	120040991	OpenSea	Body	NM_014010	ASTN2	23245	ENSG00000148219
cg00512404	-0.746429	8.8023e-05	0.0517394	chr12	15114732	OpenSea	TSS200	NM_001175	ARHGDIB	397	ENSG00000111348
cg08795964	-0.739577	7.86855e-05	0.0514828	chr8	72468987	Island
cg03299329	-0.732179	1.36315e-05	0.0340615	chr6	116850057	OpenSea	TSS200	NM_153036	FAM26D	221301	ENSG00000164451
cg03299329	-0.732179	1.36315e-05	0.0340615	chr6	116850057	OpenSea	Body	NM_001139444	BET3L	100128327	ENSG00000173626
cg15733165	-0.729048	3.86383e-05	0.0438988	chr20	44865939	OpenSea	Body	NM_021248	CDH22	64405	ENSG00000149654
cg04792443	-0.720974	4.55508e-05	0.045587	chr5	3854173	N_Shore
cg08703872	-0.720208	8.90479e-05	0.0517394	chr1	151812421	Island	Body	NR_024237	LOC100132111	100132111
cg08703872	-0.720208	8.90479e-05	0.0517394	chr1	151812421	Island	5'UTR	NM_001136003	C2CD4D	100191040	ENSG00000225556
cg02674474	-0.714651	7.86353e-05	0.0514828	chr20	9818397	N_Shore	5'UTR	NM_020341	PAK7	57144	ENSG00000101349
cg02674474	-0.714651	7.86353e-05	0.0514828	chr20	9818397	N_Shore	5'UTR	NM_177990	PAK7	57144	ENSG00000101349
cg23630568	-0.713311	2.12427e-07	0.017513	chr1	78960610	S_Shelf	Body	NM_000959	PTGFR	5737	ENSG00000122420
cg23630568	-0.713311	2.12427e-07	0.017513	chr1	78960610	S_Shelf	Body	NM_001039585	PTGFR	5737	ENSG00000122420
cg16063188	-0.712114	7.13875e-05	0.0511371	chr7	145331027	OpenSea
cg05226072	-0.707933	1.94658e-05	0.0369002	chr2	60441246	OpenSea
cg08941683	-0.705198	1.69283e-05	0.0360168	chr10	33275210	OpenSea
cg25882256	-0.696361	6.34609e-07	0.0238167	chr1	25257759	Island	TSS1500	NM_004350	RUNX3	864	ENSG00000020633
cg25882256	-0.696361	6.34609e-07	0.0238167	chr1	25257759	Island	Body	NM_001031680	RUNX3	864	ENSG00000020633
cg17317859	-0.694607	6.40264e-05	0.0499283	chr14	75231455	S_Shore	Body	NM_019589	YLPM1	56252	ENSG00000119596
cg05692711	-0.692421	8.88267e-06	0.0305952	chr1	217353830	OpenSea
cg15212349	-0.690099	3.81376e-05	0.0438988	chr5	1444852	Island	5'UTR	NM_001044	SLC6A3	6531	ENSG00000142319
cg15212349	-0.690099	3.81376e-05	0.0438988	chr5	1444852	Island	5'UTR	NM_001044	SLC6A3	6531	ENSG00000276996
cg02380403	-0.683527	6.11749e-06	0.0280427	chr11	131121976	OpenSea
cg00713549	-0.672939	2.26171e-06	0.0238167	chr7	41670492	OpenSea
cg05000150	-0.671369	1.64458e-05	0.0357784	chr16	71473667	N_Shore
cg15160057	-0.664104	7.9961e-05	0.0514828	chr8	119965139	S_Shore	TSS1500	NM_002546	TNFRSF11B	4982	ENSG00000164761
cg14212850	-0.663509	6.41754e-05	0.0499283	chr17	77460269	Island	5'UTR	NM_001082575	HRNBP3	146713	ENSG00000167281
cg02760293	-0.64665	1.08217e-05	0.0323778	chr5	146258785	S_Shore	5'UTR	NM_181674	PPP2R2B	5521	ENSG00000156475
cg02760293	-0.64665	1.08217e-05	0.0323778	chr5	146258785	S_Shore	Body	NM_181677	PPP2R2B	5521	ENSG00000156475
cg02760293	-0.64665	1.08217e-05	0.0323778	chr5	146258785	S_Shore	5'UTR	NM_181678	PPP2R2B	5521	ENSG00000156475
cg02760293	-0.64665	1.08217e-05	0.0323778	chr5	146258785	S_Shore	TSS1500	NM_181675	PPP2R2B	5521	ENSG00000156475
cg02760293	-0.64665	1.08217e-05	0.0323778	chr5	146258785	S_Shore	Body	NM_181676	PPP2R2B	5521	ENSG00000156475
cg02760293	-0.64665	1.08217e-05	0.0323778	chr5	146258785	S_Shore	TSS1500	NM_004576	PPP2R2B
cg02760293	-0.64665	1.08217e-05	0.0323778	chr5	146258785	S_Shore	TSS1500	NM_001127381	PPP2R2B
cg22977892	-0.633032	3.60216e-05	0.0438988	chr8	25907769	N_Shore
cg09373079	-0.629864	1.51339e-05	0.0347956	chr6	147882894	OpenSea	Body	NM_001030060	SAMD5	389432	ENSG00000203727
cg03807101	-0.621849	2.23559e-05	0.0385709	chr1	246034892	OpenSea	Body	NM_022743	SMYD3	64754	ENSG00000185420
cg03807101	-0.621849	2.23559e-05	0.0385709	chr1	246034892	OpenSea	Body	NM_001167740	SMYD3	64754	ENSG00000185420
cg21752492	-0.619897	7.13954e-05	0.0511371	chr9	108122345	OpenSea	Body	NM_080546	SLC44A1	23446	ENSG00000070214
cg21752492	-0.619897	7.13954e-05	0.0511371	chr9	108122345	OpenSea	Body	NM_001286730	SLC44A1	23446	ENSG00000070214
cg03215096	-0.61876	4.0176e-05	0.0446145	chr12	105582386	OpenSea	Body	NM_001251905	APPL2	55198	ENSG00000136044
cg03215096	-0.61876	4.0176e-05	0.0446145	chr12	105582386	OpenSea	Body	NM_001251904	APPL2	55198	ENSG00000136044
cg03215096	-0.61876	4.0176e-05	0.0446145	chr12	105582386	OpenSea	Body	NM_018171	APPL2	55198	ENSG00000136044
cg07611519	-0.607496	4.47434e-05	0.045587	chr12	15114689	OpenSea	TSS200	NM_001175	ARHGDIB	397	ENSG00000111348
cg14588738	-0.596227	2.2729e-05	0.0385709	chr9	109849678	OpenSea	TSS1500	NR_031752	MIR548Q	100313841	ENSG00000221331
cg25789916	-0.593728	4.79466e-05	0.0459258	chr15	74427239	Island	Body	NM_001130138	ISLR2	57611	ENSG00000167178
cg25789916	-0.593728	4.79466e-05	0.0459258	chr15	74427239	Island	Body	NM_020851	ISLR2	57611	ENSG00000167178
cg25789916	-0.593728	4.79466e-05	0.0459258	chr15	74427239	Island	Body	NM_001130136	ISLR2	57611	ENSG00000167178
cg25789916	-0.593728	4.79466e-05	0.0459258	chr15	74427239	Island	Body	NM_001130137	ISLR2	57611	ENSG00000167178
cg05552184	-0.592969	7.2639e-06	0.0285213	chr17	71548685	OpenSea	Body	NM_001144952	SDK2	54549	ENSG00000069188
cg04874580	-0.592773	7.08979e-05	0.0511371	chr8	30389210	OpenSea	Body	NM_001008712	RBPMS	11030	ENSG00000157110
cg04874580	-0.592773	7.08979e-05	0.0511371	chr8	30389210	OpenSea	Body	NM_001008710	RBPMS	11030	ENSG00000157110
cg04874580	-0.592773	7.08979e-05	0.0511371	chr8	30389210	OpenSea	Body	NM_001008711	RBPMS	11030	ENSG00000157110
cg04874580	-0.592773	7.08979e-05	0.0511371	chr8	30389210	OpenSea	Body	NM_006867	RBPMS	11030	ENSG00000157110
cg26334801	-0.587008	3.7999e-05	0.0438988	chr1	179715055	S_Shore	5'UTR	NM_173509	FAM163A	148753	ENSG00000143340
cg26334801	-0.587008	3.7999e-05	0.0438988	chr1	179715055	S_Shore	5'UTR	NM_173509	FAM163A	148753	ENSG00000243062
cg20407747	-0.57915	4.87882e-05	0.0459825	chr8	59941881	OpenSea	Body	NM_014729	TOX	9760	ENSG00000198846
cg12223839	-0.578623	6.14087e-05	0.0498628	chr18	53302039	OpenSea	Body	NM_001243226	TCF4	6925	ENSG00000196628
cg20234817	-0.556048	6.2845e-05	0.0499283	chr11	3401705	S_Shore	TSS1500	NM_001130520	ZNF195	7748	ENSG00000005801
cg20234817	-0.556048	6.2845e-05	0.0499283	chr11	3401705	S_Shore	TSS1500	NM_007152	ZNF195	7748	ENSG00000005801
cg20234817	-0.556048	6.2845e-05	0.0499283	chr11	3401705	S_Shore	TSS1500	NR_024248	LOC650368	650368	ENSG00000223756
cg20234817	-0.556048	6.2845e-05	0.0499283	chr11	3401705	S_Shore	TSS1500	NM_001130519	ZNF195	7748	ENSG00000005801
cg19126954	-0.543695	1.12734e-06	0.0238167	chr7	157616612	N_Shelf	Body	NM_002847	PTPRN2	5799	ENSG00000155093
cg19126954	-0.543695	1.12734e-06	0.0238167	chr7	157616612	N_Shelf	Body	NM_002847	PTPRN2	5799	ENSG00000282185
cg19126954	-0.543695	1.12734e-06	0.0238167	chr7	157616612	N_Shelf	Body	NM_130842	PTPRN2	5799	ENSG00000155093
cg19126954	-0.543695	1.12734e-06	0.0238167	chr7	157616612	N_Shelf	Body	NM_130842	PTPRN2	5799	ENSG00000282185
cg19126954	-0.543695	1.12734e-06	0.0238167	chr7	157616612	N_Shelf	Body	NM_130843	PTPRN2	5799	ENSG00000155093
cg19126954	-0.543695	1.12734e-06	0.0238167	chr7	157616612	N_Shelf	Body	NM_130843	PTPRN2	5799	ENSG00000282185
cg21472506	-0.543015	3.77033e-05	0.0438988	chr2	63283967	Island	3'UTR	NM_014562	OTX1	5013	ENSG00000115507
cg01269952	-0.540048	4.59014e-05	0.045587	chr2	222420472	OpenSea	Body	NM_001304537	EPHA4	2043	ENSG00000116106
cg01269952	-0.540048	4.59014e-05	0.045587	chr2	222420472	OpenSea	Body	NM_004438	EPHA4	2043	ENSG00000116106
cg01269952	-0.540048	4.59014e-05	0.045587	chr2	222420472	OpenSea	Body	NM_001304536	EPHA4	2043	ENSG00000116106
cg11642891	-0.53743	4.27698e-05	0.0453073	chr2	3452563	Island	Body	NM_016030	TTC15	51112	ENSG00000171853
cg11642891	-0.53743	4.27698e-05	0.0453073	chr2	3452563	Island	Body	NM_016030	TTC15	51112	ENSG00000274891
cg27446137	-0.536811	5.18722e-06	0.0258972	chr4	77723198	Island
cg15014975	-0.535799	4.3574e-05	0.0455587	chr1	25257547	Island	TSS1500	NM_004350	RUNX3	864	ENSG00000020633
cg15014975	-0.535799	4.3574e-05	0.0455587	chr1	25257547	Island	Body	NM_001031680	RUNX3	864	ENSG00000020633
cg03848597	-0.535191	1.8987e-05	0.0367631	chr8	114752551	OpenSea
cg20695936	-0.531399	3.00959e-06	0.0243866	chr1	25257624	Island	TSS1500	NM_004350	RUNX3	864	ENSG00000020633
cg20695936	-0.531399	3.00959e-06	0.0243866	chr1	25257624	Island	Body	NM_001031680	RUNX3	864	ENSG00000020633
cg25622366	-0.525204	4.45e-05	0.045587	chr2	63281139	Island	Body	NM_014562	OTX1	5013	ENSG00000115507
cg07063057	-0.504725	9.16039e-05	0.0517831	chr5	176730787	Island	TSS200	NM_130781	RAB24	53917	ENSG00000169228
cg07063057	-0.504725	9.16039e-05	0.0517831	chr5	176730787	Island	TSS200	NM_001031677	RAB24	53917	ENSG00000169228
cg07063057	-0.504725	9.16039e-05	0.0517831	chr5	176730787	Island	TSS200	NR_109789	RAB24	53917	ENSG00000169228
cg07063057	-0.504725	9.16039e-05	0.0517831	chr5	176730787	Island	TSS200	NR_109790	RAB24	53917	ENSG00000169228
cg07063057	-0.504725	9.16039e-05	0.0517831	chr5	176730787	Island	5'UTR	NM_001271828	PRELID1	27166	ENSG00000169230
cg07063057	-0.504725	9.16039e-05	0.0517831	chr5	176730787	Island	5'UTR	NM_013237	PRELID1	27166	ENSG00000169230
cg07063057	-0.504725	9.16039e-05	0.0517831	chr5	176730787	Island	1stExon	NM_001271828	PRELID1	27166	ENSG00000169230
cg07063057	-0.504725	9.16039e-05	0.0517831	chr5	176730787	Island	1stExon	NM_013237	PRELID1	27166	ENSG00000169230
cg19704009	-0.501088	9.47204e-05	0.0521905	chr3	87553461	OpenSea
cg27380499	-0.498457	9.47836e-05	0.0521905	chr2	219233446	S_Shore
cg23426431	-0.495581	6.68119e-05	0.0499283	chr12	107767855	OpenSea	Body	NM_001018072	BTBD11	121551	ENSG00000151136
cg11412303	-0.482121	2.34129e-05	0.0387074	chr14	42769279	OpenSea
cg15184495	-0.469791	9.70623e-05	0.0521905	chr20	44880525	S_Shore	TSS200	NM_021248	CDH22	64405	ENSG00000149654
cg13816321	-0.467993	6.27677e-05	0.0499283	chr9	973198	Island
cg13307975	-0.457139	8.45038e-05	0.0516209	chr14	104387833	Island	5'UTR	NM_001127393	C14orf2	9556	ENSG00000156411
cg13307975	-0.457139	8.45038e-05	0.0516209	chr14	104387833	Island	1stExon	NM_001127393	C14orf2	9556	ENSG00000156411
cg13307975	-0.457139	8.45038e-05	0.0516209	chr14	104387833	Island	1stExon	NM_004894	C14orf2	9556	ENSG00000156411
cg13307975	-0.457139	8.45038e-05	0.0516209	chr14	104387833	Island	5'UTR	NM_004894	C14orf2	9556	ENSG00000156411
cg10233698	-0.448701	9.54242e-05	0.0521905	chr1	209997025	OpenSea
cg26090849	-0.444641	1.22449e-05	0.0330182	chr11	1375330	OpenSea
cg25244286	-0.444528	4.38714e-05	0.045567	chr3	72794006	OpenSea
cg12568217	-0.438901	2.55467e-06	0.0238167	chr3	194248211	OpenSea
cg24506216	-0.438664	4.13059e-05	0.0447917	chr1	153951257	S_Shore	TSS1500	NM_006694	JTB	10899	ENSG00000143543
cg24006721	-0.437105	9.16202e-06	0.0305952	chr1	25258225	Island	TSS1500	NM_004350	RUNX3	864	ENSG00000020633
cg24006721	-0.437105	9.16202e-06	0.0305952	chr1	25258225	Island	Body	NM_001031680	RUNX3	864	ENSG00000020633
cg17735531	-0.43667	1.84649e-05	0.0367631	chr19	611349	Island	Body	NM_001194	HCN2	610	ENSG00000099822
cg08043998	-0.431203	7.56244e-06	0.0285213	chr12	121890503	Island	Body	NM_032590	KDM2B	84678	ENSG00000089094
cg08043998	-0.431203	7.56244e-06	0.0285213	chr12	121890503	Island	Body	NM_001005366	KDM2B	84678	ENSG00000089094
cg14334014	-0.421532	6.90896e-06	0.0285213	chr17	64226953	OpenSea	TSS1500	NM_000042	APOH	350	ENSG00000091583
cg12729139	-0.419593	4.23828e-05	0.0450869	chr1	117716411	OpenSea	Body	NR_045604	VTCN1	79679	ENSG00000134258
cg12729139	-0.419593	4.23828e-05	0.0450869	chr1	117716411	OpenSea	Body	NR_045603	VTCN1	79679	ENSG00000134258
cg12729139	-0.419593	4.23828e-05	0.0450869	chr1	117716411	OpenSea	Body	NM_001253850	VTCN1	79679	ENSG00000134258
cg12729139	-0.419593	4.23828e-05	0.0450869	chr1	117716411	OpenSea	Body	NM_024626	VTCN1	79679	ENSG00000134258
cg12729139	-0.419593	4.23828e-05	0.0450869	chr1	117716411	OpenSea	5'UTR	NM_001253849	VTCN1	79679	ENSG00000134258
cg24019564	-0.406164	2.36043e-06	0.0238167	chr1	25257566	Island	TSS1500	NM_004350	RUNX3	864	ENSG00000020633
cg24019564	-0.406164	2.36043e-06	0.0238167	chr1	25257566	Island	Body	NM_001031680	RUNX3	864	ENSG00000020633
cg04122081	-0.405263	9.06455e-05	0.0517394	chr1	33545515	N_Shore	TSS1500	NM_052998	ADC	113451	ENSG00000142920
cg24102319	-0.405261	5.61325e-05	0.0480541	chr16	85922457	OpenSea
cg14388488	-0.393992	8.79954e-05	0.0517394	chr20	61051777	Island	TSS1500	NM_080473	GATA5	140628	ENSG00000130700
cg23318809	-0.386115	6.44775e-05	0.0499283	chr2	6864436	OpenSea
cg19811087	-0.370855	3.80131e-05	0.0438988	chr1	91184501	Island
cg00787166	-0.36674	1.58748e-05	0.0353728	chr17	75401199	S_Shelf	1stExon	NM_001293696	SEPT9	10801	ENSG00000184640
cg00787166	-0.36674	1.58748e-05	0.0353728	chr17	75401199	S_Shelf	1stExon	NM_001293696	SEPT9	10801	ENSG00000282302
cg00787166	-0.36674	1.58748e-05	0.0353728	chr17	75401199	S_Shelf	Body	NM_001113493	SEPT9	10801	ENSG00000184640
cg00787166	-0.36674	1.58748e-05	0.0353728	chr17	75401199	S_Shelf	Body	NM_001113493	SEPT9	10801	ENSG00000282302
cg00787166	-0.36674	1.58748e-05	0.0353728	chr17	75401199	S_Shelf	Body	NM_001113494	SEPT9	10801	ENSG00000184640
cg00787166	-0.36674	1.58748e-05	0.0353728	chr17	75401199	S_Shelf	Body	NM_001113494	SEPT9	10801	ENSG00000282302
cg00787166	-0.36674	1.58748e-05	0.0353728	chr17	75401199	S_Shelf	Body	NM_001113492	SEPT9	10801	ENSG00000184640
cg00787166	-0.36674	1.58748e-05	0.0353728	chr17	75401199	S_Shelf	Body	NM_001113492	SEPT9	10801	ENSG00000282302
cg00787166	-0.36674	1.58748e-05	0.0353728	chr17	75401199	S_Shelf	Body	NM_001293695	SEPT9	10801	ENSG00000184640
cg00787166	-0.36674	1.58748e-05	0.0353728	chr17	75401199	S_Shelf	Body	NM_001293695	SEPT9	10801	ENSG00000282302
cg00787166	-0.36674	1.58748e-05	0.0353728	chr17	75401199	S_Shelf	Body	NM_001113491	SEPT9	10801	ENSG00000184640
cg00787166	-0.36674	1.58748e-05	0.0353728	chr17	75401199	S_Shelf	Body	NM_001113491	SEPT9	10801	ENSG00000282302
cg00787166	-0.36674	1.58748e-05	0.0353728	chr17	75401199	S_Shelf	Body	NM_006640	SEPT9	10801	ENSG00000184640
cg00787166	-0.36674	1.58748e-05	0.0353728	chr17	75401199	S_Shelf	Body	NM_006640	SEPT9	10801	ENSG00000282302
cg23762657	-0.365918	6.29141e-05	0.0499283	chr6	91600978	OpenSea
cg13069237	-0.363971	6.5247e-05	0.0499283	chr1	6063456	OpenSea
cg06305375	-0.36295	8.27518e-05	0.0516209	chr16	2354020	OpenSea	Body	NM_001089	ABCA3	21	ENSG00000167972
cg20825947	-0.359639	8.87354e-05	0.0517394	chr8	22193722	OpenSea	Body	NM_018068	PIWIL2	55124	ENSG00000197181
cg20825947	-0.359639	8.87354e-05	0.0517394	chr8	22193722	OpenSea	Body	NM_001135721	PIWIL2	55124	ENSG00000197181
cg02898094	-0.345554	7.10478e-05	0.0511371	chr7	96634914	Island	Body	NR_015448	DLX6AS	285987
cg02898094	-0.345554	7.10478e-05	0.0511371	chr7	96634914	Island	TSS1500	NM_005222	DLX6	1750	ENSG00000006377
cg13670378	-0.34137	7.89097e-05	0.0514828	chr17	46656777	S_Shore	TSS1500	NM_024015	HOXB4	3214	ENSG00000182742
cg12097883	-0.339146	2.11649e-08	0.00533612	chr17	62774939	Island	Body	NR_027487	LOC146880	146880
cg12097883	-0.339146	2.11649e-08	0.00533612	chr17	62774939	Island	Body	NR_026899	LOC146880	109286553	ENSG00000215769
cg09980477	-0.338425	3.9228e-05	0.044119	chr17	66255444	Island	5'UTR	NM_014960	ARSG	22901	ENSG00000141337
cg09980477	-0.338425	3.9228e-05	0.044119	chr17	66255444	Island	1stExon	NM_014960	ARSG	22901	ENSG00000141337
cg11938672	-0.333275	6.35041e-05	0.0499283	chr6	170055155	OpenSea	Body	NM_182552	WDR27	253769	ENSG00000184465
cg25418001	-0.319788	4.95199e-05	0.0459825	chr7	79780310	OpenSea	Body	NM_002069	GNAI1	2770	ENSG00000127955
cg20397178	-0.318343	5.03322e-05	0.0460669	chr16	11760837	N_Shore	TSS1500	NM_003498	SNN	8303	ENSG00000184602
cg13945719	-0.31465	9.06347e-05	0.0517394	chr1	213902439	OpenSea
cg27144554	-0.309726	8.33021e-05	0.0516209	chr7	111894427	OpenSea	Body	NM_021994	ZNF277	11179	ENSG00000198839
cg19253201	-0.307994	6.65257e-05	0.0499283	chr17	64227024	OpenSea	TSS1500	NM_000042	APOH	350	ENSG00000091583
cg24694502	-0.306051	4.87578e-05	0.0459825	chr1	4736187	OpenSea	Body	NM_018836	AJAP1	55966	ENSG00000196581
cg24694502	-0.306051	4.87578e-05	0.0459825	chr1	4736187	OpenSea	Body	NM_001042478	AJAP1	55966	ENSG00000196581
cg25705717	-0.296912	7.72968e-05	0.0514828	chr10	27608719	Island
cg07152755	-0.287531	7.57464e-05	0.0514828	chr2	105474472	S_Shore
cg19843449	-0.284881	2.17025e-05	0.0385327	chr15	27217186	S_Shore	Body	NM_033223	GABRG3	2567	ENSG00000182256
cg23588204	-0.283035	1.93187e-05	0.036863	chr1	212003001	N_Shore	5'UTR	NM_014873	LPGAT1	9926	ENSG00000123684
cg22735650	-0.282881	1.30309e-05	0.0336021	chr15	71504159	N_Shelf	Body	NM_024817	THSD4	79875	ENSG00000187720
cg03932201	-0.282447	1.35702e-05	0.0340615	chr10	129222937	OpenSea	Body	NM_001380	DOCK1	1793	ENSG00000150760
cg26795312	-0.281876	7.65129e-05	0.0514828	chr8	146231199	S_Shelf	Body	NR_026974	C8orf77	286103	ENSG00000255559
cg25873522	-0.281297	5.7683e-05	0.0485587	chr11	8736732	OpenSea	Body	NM_139157	ST5	6764	ENSG00000166444
cg25873522	-0.281297	5.7683e-05	0.0485587	chr11	8736732	OpenSea	Body	NM_005418	ST5	6764	ENSG00000166444
cg25873522	-0.281297	5.7683e-05	0.0485587	chr11	8736732	OpenSea	Body	NM_213618	ST5	6764	ENSG00000166444
cg06566454	-0.278678	5.5868e-05	0.0479915	chr12	18399217	OpenSea
cg17815221	-0.278651	7.56205e-05	0.0514828	chr16	81820172	OpenSea	Body	NM_002661	PLCG2	5336	ENSG00000197943
cg19262563	-0.277557	2.0849e-05	0.0380714	chr7	80456684	OpenSea	Body	NM_006379	SEMA3C	10512	ENSG00000075223
cg07028821	-0.27451	1.10962e-05	0.0324653	chr7	140773905	Island
cg02341578	-0.266599	8.44935e-05	0.0516209	chr8	493635	N_Shore	Body	NM_175075	C8orf42	157695	ENSG00000180190
cg26256263	-0.264023	2.3259e-06	0.0238167	chr1	25258146	Island	TSS1500	NM_004350	RUNX3	864	ENSG00000020633
cg26256263	-0.264023	2.3259e-06	0.0238167	chr1	25258146	Island	Body	NM_001031680	RUNX3	864	ENSG00000020633
cg21121708	-0.260715	9.08258e-05	0.0517394	chr22	43832328	S_Shore	Body	NM_001044370	MPPED1	758	ENSG00000186732
cg18049414	-0.241681	4.00676e-06	0.0245587	chr11	92850491	OpenSea
cg24670442	-0.238174	1.43936e-05	0.0345612	chr1	89736478	OpenSea	5'UTR	NM_001134486	GBP5	115362	ENSG00000154451
cg24670442	-0.238174	1.43936e-05	0.0345612	chr1	89736478	OpenSea	5'UTR	NM_052942	GBP5	115362	ENSG00000154451
cg03171924	-0.230981	2.3013e-05	0.0385709	chr1	25258332	Island	Body	NM_001031680	RUNX3	864	ENSG00000020633
cg18240528	-0.226226	4.60155e-05	0.045587	chr1	205341305	OpenSea
cg18322025	-0.221434	6.23321e-05	0.0499283	chr6	170055332	N_Shelf	Body	NM_182552	WDR27	253769	ENSG00000184465
cg10041232	-0.219652	9.3362e-05	0.0521905	chr6	31700237	S_Shore	Body	NM_001288	CLIC1	1192	ENSG00000213719
cg10041232	-0.219652	9.3362e-05	0.0521905	chr6	31700237	S_Shore	Body	NM_001288	CLIC1	1192	ENSG00000226651
cg10041232	-0.219652	9.3362e-05	0.0521905	chr6	31700237	S_Shore	Body	NM_001288	CLIC1	1192	ENSG00000230685
cg10041232	-0.219652	9.3362e-05	0.0521905	chr6	31700237	S_Shore	Body	NM_001288	CLIC1	1192	ENSG00000223639
cg10041232	-0.219652	9.3362e-05	0.0521905	chr6	31700237	S_Shore	Body	NM_001288	CLIC1	1192	ENSG00000226417
cg10041232	-0.219652	9.3362e-05	0.0521905	chr6	31700237	S_Shore	Body	NM_001288	CLIC1	1192	ENSG00000226248
cg10041232	-0.219652	9.3362e-05	0.0521905	chr6	31700237	S_Shore	Body	NM_001288	CLIC1	1192	ENSG00000206394
cg27582696	-0.217494	1.33285e-05	0.0339433	chr6	13876469	S_Shelf
cg17771031	-0.215279	2.34756e-07	0.017513	chr20	44875334	Island	Body	NM_021248	CDH22	64405	ENSG00000149654
cg01753331	-0.213039	9.8461e-05	0.0521905	chr12	126486740	OpenSea
cg24306969	-0.206226	2.42725e-06	0.0238167	chr6	34251715	OpenSea
cg13386505	-0.200067	2.56084e-05	0.0396099	chr17	71548754	OpenSea	Body	NM_001144952	SDK2	54549	ENSG00000069188
cg06024930	-0.192664	7.50916e-06	0.0285213	chr12	121890328	Island	Body	NM_032590	KDM2B	84678	ENSG00000089094
cg06024930	-0.192664	7.50916e-06	0.0285213	chr12	121890328	Island	Body	NM_001005366	KDM2B	84678	ENSG00000089094
cg00918522	-0.190313	9.58864e-05	0.0521905	chr4	175132871	N_Shelf
cg09462274	-0.18933	7.20878e-05	0.0512772	chr11	15529390	OpenSea
cg19680908	-0.185628	5.18271e-05	0.0464145	chr5	119992045	OpenSea	Body	NM_001300783	PRR16	51334	ENSG00000184838
cg19680908	-0.185628	5.18271e-05	0.0464145	chr5	119992045	OpenSea	5'UTR	NM_001308087	PRR16	51334	ENSG00000184838
cg19680908	-0.185628	5.18271e-05	0.0464145	chr5	119992045	OpenSea	Body	NM_016644	PRR16	51334	ENSG00000184838
cg19680908	-0.185628	5.18271e-05	0.0464145	chr5	119992045	OpenSea	5'UTR	NM_001308088	PRR16	51334	ENSG00000184838
cg08969593	-0.181917	4.89897e-05	0.0459825	chr16	188903	Island	TSS1500	NM_001039476	C16orf35	8131	ENSG00000103148
cg08969593	-0.181917	4.89897e-05	0.0459825	chr16	188903	Island	TSS1500	NM_001077350	C16orf35	8131	ENSG00000103148
cg13971906	-0.178029	8.05383e-05	0.0514828	chr13	43882850	OpenSea	Body	NM_001127615	ENOX1	55068	ENSG00000120658
cg13971906	-0.178029	8.05383e-05	0.0514828	chr13	43882850	OpenSea	Body	NM_001242863	ENOX1	55068	ENSG00000120658
cg13971906	-0.178029	8.05383e-05	0.0514828	chr13	43882850	OpenSea	Body	NM_017993	ENOX1	55068	ENSG00000120658
cg24523069	-0.177594	6.50014e-05	0.0499283	chr7	156404476	S_Shelf
cg25857471	-0.166832	8.54801e-05	0.0517394	chr6	30910113	OpenSea	Body	NM_080870	DPCR1	135656	ENSG00000168631
cg25857471	-0.166832	8.54801e-05	0.0517394	chr6	30910113	OpenSea	Body	NM_080870	DPCR1	135656	ENSG00000232308
cg25857471	-0.166832	8.54801e-05	0.0517394	chr6	30910113	OpenSea	Body	NM_080870	DPCR1	135656	ENSG00000257232
cg25857471	-0.166832	8.54801e-05	0.0517394	chr6	30910113	OpenSea	Body	NM_080870	DPCR1	135656	ENSG00000229284
cg25857471	-0.166832	8.54801e-05	0.0517394	chr6	30910113	OpenSea	Body	NM_080870	DPCR1	135656	ENSG00000232251
cg07785717	-0.156713	1.23698e-06	0.0238167	chr19	54485321	Island	Body	NM_031895	CACNG8	59283	ENSG00000142408
cg07785717	-0.156713	1.23698e-06	0.0238167	chr19	54485321	Island	TSS1500	NR_030632	MIR935	100126325	ENSG00000284583
cg12718528	-0.129855	9.33222e-05	0.0521905	chr4	47710147	S_Shore	Body	NM_006587	CORIN	10699	ENSG00000145244
cg00463767	-0.128349	4.15174e-05	0.044857	chr2	63282043	N_Shore	Body	NM_014562	OTX1	5013	ENSG00000115507
cg00448194	-0.119758	4.11301e-05	0.0447917	chr7	28111415	OpenSea	Body	NM_175061	JAZF1	221895	ENSG00000153814
cg00254495	-0.117554	4.16329e-05	0.044857	chr19	1582340	S_Shore	Body	NM_001281453	MBD3	53615	ENSG00000071655
cg00254495	-0.117554	4.16329e-05	0.044857	chr19	1582340	S_Shore	Body	NM_001281454	MBD3	53615	ENSG00000071655
cg15105198	-0.116923	8.40279e-05	0.0516209	chr5	6236531	OpenSea
cg05139829	-0.116478	6.7751e-05	0.0503136	chr8	89255727	OpenSea	Body	NM_005941	MMP16	4325	ENSG00000156103
cg23101394	-0.108792	8.68291e-05	0.0517394	chr5	1825815	OpenSea
cg00332212	-0.107498	7.88361e-05	0.0514828	chr4	48908696	Island	1stExon	NM_152398	OCIAD2	132299	ENSG00000145247
cg00332212	-0.107498	7.88361e-05	0.0514828	chr4	48908696	Island	1stExon	NM_001014446	OCIAD2	132299	ENSG00000145247
cg00332212	-0.107498	7.88361e-05	0.0514828	chr4	48908696	Island	5'UTR	NM_152398	OCIAD2	132299	ENSG00000145247
cg00332212	-0.107498	7.88361e-05	0.0514828	chr4	48908696	Island	5'UTR	NM_001014446	OCIAD2	132299	ENSG00000145247
cg18670461	-0.106348	9.85251e-05	0.0521905	chr8	80739361	OpenSea	Body	NR_110954	LOC101927040	101927040	ENSG00000249328
cg03162779	-0.10007	3.63778e-05	0.0438988	chr11	2308362	OpenSea
cg25428553	-0.0968214	6.58623e-05	0.0499283	chr2	105275706	Island
cg06705017	-0.0872318	8.19039e-05	0.0514828	chr18	77552402	Island
cg24842859	-0.0822853	6.38513e-06	0.0282426	chr1	25257599	Island	TSS1500	NM_004350	RUNX3	864	ENSG00000020633
cg24842859	-0.0822853	6.38513e-06	0.0282426	chr1	25257599	Island	Body	NM_001031680	RUNX3	864	ENSG00000020633
cg11461472	-0.0805715	4.82173e-05	0.0459825	chr5	1764354	OpenSea
cg18087266	-0.0728096	5.80139e-05	0.0485587	chr1	25257629	Island	TSS1500	NM_004350	RUNX3	864	ENSG00000020633
cg18087266	-0.0728096	5.80139e-05	0.0485587	chr1	25257629	Island	Body	NM_001031680	RUNX3	864	ENSG00000020633
cg19004851	-0.0442952	1.43867e-05	0.0345612	chr7	100183969	Island	TSS200	NM_001289934	LRCH4	4034	ENSG00000077454
cg19004851	-0.0442952	1.43867e-05	0.0345612	chr7	100183969	Island	TSS200	NM_002319	LRCH4	4034	ENSG00000077454
cg19004851	-0.0442952	1.43867e-05	0.0345612	chr7	100183969	Island	5'UTR	NM_033506	FBXO24	26261	ENSG00000106336
cg19004851	-0.0442952	1.43867e-05	0.0345612	chr7	100183969	Island	1stExon	NM_033506	FBXO24	26261	ENSG00000106336
cg16151151	-0.0416373	1.94229e-06	0.0238167	chr5	50683467	Island	Body	NM_002202	ISL1	3670	ENSG00000016082
cg10993442	-0.0229313	1.91345e-05	0.0367631	chr1	25257587	Island	TSS1500	NM_004350	RUNX3	864	ENSG00000020633
cg10993442	-0.0229313	1.91345e-05	0.0367631	chr1	25257587	Island	Body	NM_001031680	RUNX3	864	ENSG00000020633

## Sheet: Hypermethylated
CpG	SMOKER_vs_NON_SMOKER	pval	FDR	chr	pos	Relation_to_Island	UCSC_RefGene_Group	UCSC_RefGene_Accession	UCSC_RefGene_Name	ENTREZID	ENSEMBL
cg03720617	3.02983	1.0717e-06	0.0238167	chr16	47527034	OpenSea	Body	NM_000293	PHKB	5257	ENSG00000102893
cg13534698	2.97167	1.38995e-05	0.0341887	chr16	15754910	OpenSea	5'UTR	NM_001143979	NDE1	54820	ENSG00000072864
cg13534698	2.97167	1.38995e-05	0.0341887	chr16	15754910	OpenSea	5'UTR	NM_001143979	NDE1	54820	ENSG00000275911
cg13534698	2.97167	1.38995e-05	0.0341887	chr16	15754910	OpenSea	5'UTR	NM_017668	NDE1	54820	ENSG00000072864
cg13534698	2.97167	1.38995e-05	0.0341887	chr16	15754910	OpenSea	5'UTR	NM_017668	NDE1	54820	ENSG00000275911
cg26767001	2.91384	1.7478e-06	0.0238167	chr12	966836	OpenSea	Body	NM_018979	WNK1	65125	ENSG00000060237
cg21427300	2.88279	8.14777e-05	0.0514828	chr6	74233399	Island
cg10523442	2.86715	4.03632e-06	0.0245587	chr7	30856832	OpenSea	Body	NM_032222	FAM188B	84182	ENSG00000106125
cg10523442	2.86715	4.03632e-06	0.0245587	chr7	30856832	OpenSea	Body	NR_037598	INMT-FAM188B	100526825	ENSG00000254959
cg02271560	2.8633	2.51491e-05	0.0395868	chr2	55450737	Island	5'UTR	NM_152385	C2orf63	130162	ENSG00000162994
cg02271560	2.8633	2.51491e-05	0.0395868	chr2	55450737	Island	5'UTR	NM_001135598	C2orf63	130162	ENSG00000162994
cg06560360	2.78627	2.29144e-05	0.0385709	chr14	68640237	OpenSea	Body	NM_133510	RAD51B	5890	ENSG00000182185
cg06560360	2.78627	2.29144e-05	0.0385709	chr14	68640237	OpenSea	Body	NM_002877	RAD51B	5890	ENSG00000182185
cg06560360	2.78627	2.29144e-05	0.0385709	chr14	68640237	OpenSea	Body	NM_133509	RAD51B	5890	ENSG00000182185
cg22225080	2.70131	3.87018e-06	0.0245587	chr18	42352602	OpenSea	Body	NM_001130110	SETBP1	26040	ENSG00000152217
cg22225080	2.70131	3.87018e-06	0.0245587	chr18	42352602	OpenSea	Body	NM_015559	SETBP1	26040	ENSG00000152217
cg04005521	2.69387	9.90054e-06	0.0315966	chr7	139900232	OpenSea
cg26357905	2.66383	6.2454e-05	0.0499283	chr18	12033090	OpenSea
cg25172859	2.66009	6.11416e-06	0.0280427	chr10	30516514	OpenSea	Body	NR_120653	LOC101929279	101929279
cg04878315	2.57179	6.68656e-05	0.0499283	chr7	27204127	Island	Body	NM_152739	HOXA9	3205	ENSG00000078399
cg04878315	2.57179	6.68656e-05	0.0499283	chr7	27204127	Island	Body	NR_037940	HOXA10-HOXA9	100534589
cg25486618	2.56928	4.35717e-06	0.024583	chr11	78136642	OpenSea
cg16533146	2.53233	1.25988e-06	0.0238167	chr12	27901072	OpenSea	Body	NM_021821	MRPS35	60488	ENSG00000061794
cg01678900	2.5211	6.69352e-05	0.0499283	chr8	71359467	OpenSea
cg01906955	2.50914	6.63832e-06	0.0285213	chr1	81577665	OpenSea
cg04891600	2.49023	1.62582e-07	0.017513	chr11	104916760	OpenSea	TSS1500	NM_001017534	CARD16	114769	ENSG00000204397
cg05357859	2.44867	2.72739e-07	0.017513	chr6	90192983	OpenSea	5'UTR	NM_014942	ANKRD6	22881	ENSG00000135299
cg00272343	2.40018	5.10887e-06	0.0258972	chr10	3584776	OpenSea	Body	NR_131187	LOC105376360	105376360
cg11773391	2.38149	3.616e-05	0.0438988	chr2	152628341	OpenSea
cg26556684	2.37238	8.75211e-06	0.0305952	chr2	102764618	OpenSea	5'UTR	NM_001288706	IL1R1	3554	ENSG00000115594
cg26556684	2.37238	8.75211e-06	0.0305952	chr2	102764618	OpenSea	5'UTR	NM_000877	IL1R1	3554	ENSG00000115594
cg20419110	2.35218	5.04918e-05	0.0460669	chr6	43478491	Island	TSS200	NM_001012974	C6orf154	221424	ENSG00000204052
cg25531591	2.34731	5.94837e-06	0.0277724	chr11	17866913	OpenSea	Body	NR_104041	SERGEF	26297	ENSG00000129158
cg25531591	2.34731	5.94837e-06	0.0277724	chr11	17866913	OpenSea	Body	NR_104040	SERGEF	26297	ENSG00000129158
cg25531591	2.34731	5.94837e-06	0.0277724	chr11	17866913	OpenSea	Body	NM_012139	SERGEF	26297	ENSG00000129158
cg25139033	2.34572	3.14364e-05	0.0428596	chr16	84844354	OpenSea
cg06042259	2.32935	3.42493e-05	0.0438988	chr7	28165602	OpenSea	Body	NM_175061	JAZF1	221895	ENSG00000153814
cg25042939	2.31555	1.74383e-05	0.036486	chr1	170217399	OpenSea
cg06349264	2.28473	4.33559e-05	0.0455587	chr1	173106049	OpenSea
cg09711028	2.27925	6.62422e-05	0.0499283	chr12	21976788	OpenSea	Body	NM_020298	ABCC9	10060	ENSG00000069431
cg09711028	2.27925	6.62422e-05	0.0499283	chr12	21976788	OpenSea	Body	NM_020297	ABCC9	10060	ENSG00000069431
cg09711028	2.27925	6.62422e-05	0.0499283	chr12	21976788	OpenSea	Body	NM_005691	ABCC9	10060	ENSG00000069431
cg14332079	2.27436	1.05501e-06	0.0238167	chr8	25316196	Island	TSS1500	NM_017634	KCTD9	54793	ENSG00000104756
cg14332079	2.27436	1.05501e-06	0.0238167	chr8	25316196	Island	TSS1500	NM_152562	CDCA2	157313	ENSG00000184661
cg13114921	2.26913	9.80106e-06	0.0314784	chr12	30976001	Island
cg16311756	2.26467	7.5079e-06	0.0285213	chr15	22909201	OpenSea	5'UTR	NM_014608	CYFIP1	23191	ENSG00000273749
cg16311756	2.26467	7.5079e-06	0.0285213	chr15	22909201	OpenSea	5'UTR	NM_014608	CYFIP1	23191	ENSG00000280618
cg16311756	2.26467	7.5079e-06	0.0285213	chr15	22909201	OpenSea	5'UTR	NM_014608	CYFIP1	23191	ENSG00000288461
cg16311756	2.26467	7.5079e-06	0.0285213	chr15	22909201	OpenSea	5'UTR	NM_001287810	CYFIP1	23191	ENSG00000273749
cg16311756	2.26467	7.5079e-06	0.0285213	chr15	22909201	OpenSea	5'UTR	NM_001287810	CYFIP1	23191	ENSG00000280618
cg16311756	2.26467	7.5079e-06	0.0285213	chr15	22909201	OpenSea	5'UTR	NM_001287810	CYFIP1	23191	ENSG00000288461
cg22127684	2.24704	7.05898e-05	0.0511371	chr3	7546952	OpenSea	Body	NM_181874	GRM7	2917	ENSG00000196277
cg22127684	2.24704	7.05898e-05	0.0511371	chr3	7546952	OpenSea	Body	NM_000844	GRM7	2917	ENSG00000196277
cg26484395	2.24273	4.07162e-06	0.0245587	chr2	220852916	OpenSea
cg11627358	2.22336	2.21177e-05	0.0385709	chr3	177611183	OpenSea	Body	NR_110826	KCCAT211	102724550	ENSG00000231574
cg14566573	2.22212	3.53076e-05	0.0438988	chr4	31238581	OpenSea
cg25068347	2.20954	2.80378e-06	0.0243866	chr11	128343784	OpenSea	Body	NM_005238	ETS1	2113	ENSG00000134954
cg04498511	2.20904	6.56651e-05	0.0499283	chr1	203768441	S_Shelf	5'UTR	NM_014827	ZC3H11A	9877	ENSG00000058673
cg16142146	2.20469	9.3845e-05	0.0521905	chr2	153056747	OpenSea
cg03749527	2.20413	2.39457e-05	0.0392027	chr12	68322928	OpenSea	TSS200	NR_120456	LINC01479	101927922	ENSG00000255772
cg05217317	2.17295	8.44407e-06	0.0305952	chr3	107725582	OpenSea
cg13534901	2.17252	1.60548e-06	0.0238167	chr7	17339481	S_Shore	Body	NM_001621	AHR	196	ENSG00000106546
cg17464062	2.15769	2.8312e-05	0.0411722	chr4	156885745	OpenSea
cg03653088	2.15709	2.65731e-05	0.0404812	chr17	9925860	OpenSea	5'UTR	NM_001130831	GAS7	8522	ENSG00000007237
cg03653088	2.15709	2.65731e-05	0.0404812	chr17	9925860	OpenSea	Body	NM_201433	GAS7	8522	ENSG00000007237
cg03653088	2.15709	2.65731e-05	0.0404812	chr17	9925860	OpenSea	Body	NM_201432	GAS7	8522	ENSG00000007237
cg10874537	2.15234	3.08944e-05	0.0424716	chr8	90838364	OpenSea
cg12266824	2.15212	1.39946e-05	0.0342509	chr12	19954094	OpenSea
cg14520913	2.14848	5.89564e-06	0.0277724	chr11	114166440	OpenSea	TSS200	NM_006169	NNMT	4837	ENSG00000166741
cg13328496	2.14489	7.03483e-06	0.0285213	chr10	81227764	OpenSea
cg12159166	2.13511	1.12666e-06	0.0238167	chr11	75649913	OpenSea	Body	NM_003369	UVRAG	7405	ENSG00000198382
cg18045400	2.12766	2.48633e-05	0.0395868	chr10	11564762	OpenSea	Body	NM_001080491	USP6NL	9712	ENSG00000148429
cg18045400	2.12766	2.48633e-05	0.0395868	chr10	11564762	OpenSea	Body	NM_014688	USP6NL	9712	ENSG00000148429
cg22985382	2.12478	6.72562e-05	0.0500222	chr5	14102250	OpenSea
cg13052622	2.1211	1.9847e-05	0.037241	chr10	7071021	OpenSea
cg01337502	2.11941	4.08024e-06	0.0245587	chr18	46242657	OpenSea	Body	NM_014772	CTIF	9811	ENSG00000134030
cg01337502	2.11941	4.08024e-06	0.0245587	chr18	46242657	OpenSea	Body	NM_014772	CTIF	9811	ENSG00000282825
cg01337502	2.11941	4.08024e-06	0.0245587	chr18	46242657	OpenSea	Body	NM_001142397	CTIF	9811	ENSG00000134030
cg01337502	2.11941	4.08024e-06	0.0245587	chr18	46242657	OpenSea	Body	NM_001142397	CTIF	9811	ENSG00000282825
cg06706159	2.11085	2.14815e-06	0.0238167	chr19	18260350	Island	Body	NM_015016	MAST3	23031	ENSG00000099308
cg13125510	2.10901	5.66744e-05	0.0482729	chr11	130542491	OpenSea
cg14434601	2.09312	3.47694e-05	0.0438988	chr7	42303654	OpenSea
cg07812827	2.08994	1.91747e-05	0.0367631	chr8	74282708	OpenSea
cg00294534	2.08636	1.51309e-05	0.0347956	chr7	1607247	N_Shelf	3'UTR	NM_001134340	PSMG3	84262	ENSG00000157778
cg00294534	2.08636	1.51309e-05	0.0347956	chr7	1607247	N_Shelf	3'UTR	NM_032302	PSMG3	84262	ENSG00000157778
cg01112878	2.07585	6.13563e-05	0.0498628	chr6	107997468	OpenSea
cg05828605	2.07437	3.19195e-06	0.0243866	chr8	134401000	OpenSea
cg07830374	2.06151	2.57813e-05	0.0397554	chr18	33043875	OpenSea
cg27266396	2.06048	6.82689e-05	0.0504796	chr1	10290789	OpenSea	5'UTR	NM_015074	KIF1B	23095	ENSG00000054523
cg27266396	2.06048	6.82689e-05	0.0504796	chr1	10290789	OpenSea	5'UTR	NM_183416	KIF1B	23095	ENSG00000054523
cg10676309	2.05986	6.27088e-05	0.0499283	chr5	137685565	N_Shelf
cg22527533	2.05164	1.34774e-05	0.0340615	chr6	46389140	OpenSea	Body	NM_001251974	RCAN2	10231	ENSG00000172348
cg22527533	2.05164	1.34774e-05	0.0340615	chr6	46389140	OpenSea	Body	NM_001251973	RCAN2	10231	ENSG00000172348
cg27266060	2.04007	5.48672e-05	0.0475441	chr8	22091797	S_Shelf
cg12650480	2.03904	4.08811e-05	0.0447482	chr1	206235524	OpenSea
cg07273127	2.03778	7.20994e-05	0.0512772	chr22	43811841	S_Shelf	5'UTR	NM_001044370	MPPED1	758	ENSG00000186732
cg05249959	2.02336	7.88139e-05	0.0514828	chr4	150330549	OpenSea
cg21435549	2.00588	1.02001e-05	0.032064	chr19	13108155	S_Shore	Body	NM_002501	NFIX	4784	ENSG00000008441
cg10992974	1.99692	3.80512e-05	0.0438988	chr9	29556517	OpenSea
cg09873062	1.99118	6.80383e-06	0.0285213	chr2	238093423	OpenSea
cg15046142	1.99086	8.62975e-06	0.0305952	chr14	23546096	OpenSea	Body	NM_001164815	ACIN1	22985	ENSG00000100813
cg15046142	1.99086	8.62975e-06	0.0305952	chr14	23546096	OpenSea	Body	NM_001164814	ACIN1	22985	ENSG00000100813
cg15046142	1.99086	8.62975e-06	0.0305952	chr14	23546096	OpenSea	Body	NM_014977	ACIN1	22985	ENSG00000100813
cg16681157	1.97891	4.5052e-05	0.045587	chr16	49594482	OpenSea	Body	NM_015069	ZNF423	23090	ENSG00000102935
cg07677776	1.96973	1.45551e-05	0.0346193	chr13	113797388	OpenSea	Body	NM_000504	F10	2159	ENSG00000126218
cg14776531	1.94872	7.11047e-06	0.0285213	chr5	112458471	OpenSea	Body	NM_002387	MCC	4163	ENSG00000171444
cg14776531	1.94872	7.11047e-06	0.0285213	chr5	112458471	OpenSea	Body	NM_001085377	MCC	4163	ENSG00000171444
cg27572122	1.9322	3.07916e-05	0.0424716	chr5	5057719	OpenSea	Body	NR_026994	LINC01020	340094	ENSG00000215231
cg14061255	1.93208	8.73046e-05	0.0517394	chr9	71923415	OpenSea
cg15794184	1.92915	1.36199e-06	0.0238167	chr1	174933932	OpenSea	Body	NM_001243765	RABGAP1L	9910	ENSG00000152061
cg06848700	1.92889	1.08733e-05	0.0323778	chr9	4933388	OpenSea
cg17660833	1.92606	4.16317e-05	0.044857	chr3	11267020	OpenSea	5'UTR	NM_001098213	HRH1	3269	ENSG00000196639
cg17660833	1.92606	4.16317e-05	0.044857	chr3	11267020	OpenSea	TSS1500	NM_001098211	HRH1	3269	ENSG00000196639
cg17660833	1.92606	4.16317e-05	0.044857	chr3	11267020	OpenSea	5'UTR	NM_001098212	HRH1	3269	ENSG00000196639
cg04106285	1.92415	9.90283e-05	0.0521905	chr12	96822761	OpenSea
cg03422256	1.91225	1.59428e-05	0.0353728	chr2	192757348	OpenSea
cg20612593	1.90491	4.58273e-06	0.024583	chr9	139796293	OpenSea	Body	NM_021138	TRAF2	7186	ENSG00000127191
cg22218566	1.90183	4.78589e-05	0.0459258	chr5	140985440	OpenSea	Body	NM_001079812	DIAPH1	1729	ENSG00000131504
cg22218566	1.90183	4.78589e-05	0.0459258	chr5	140985440	OpenSea	Body	NM_005219	DIAPH1	1729	ENSG00000131504
cg03562120	1.90131	7.84128e-05	0.0514828	chr20	43343997	OpenSea	1stExon	NM_003881	WISP2	8839	ENSG00000064205
cg03562120	1.90131	7.84128e-05	0.0514828	chr20	43343997	OpenSea	5'UTR	NM_003881	WISP2	8839	ENSG00000064205
cg02359315	1.90008	7.4622e-06	0.0285213	chr1	78721270	OpenSea	Body	NR_027310	MGC27382	149047	ENSG00000237413
cg07315207	1.89578	6.47867e-05	0.0499283	chr10	79177682	OpenSea	Body	NM_002247	KCNMA1	3778	ENSG00000156113
cg07315207	1.89578	6.47867e-05	0.0499283	chr10	79177682	OpenSea	Body	NM_001161353	KCNMA1	3778	ENSG00000156113
cg07315207	1.89578	6.47867e-05	0.0499283	chr10	79177682	OpenSea	Body	NM_001161352	KCNMA1	3778	ENSG00000156113
cg07315207	1.89578	6.47867e-05	0.0499283	chr10	79177682	OpenSea	Body	NM_001271519	KCNMA1	3778	ENSG00000156113
cg07315207	1.89578	6.47867e-05	0.0499283	chr10	79177682	OpenSea	Body	NM_001014797	KCNMA1	3778	ENSG00000156113
cg07315207	1.89578	6.47867e-05	0.0499283	chr10	79177682	OpenSea	Body	NM_001271518	KCNMA1	3778	ENSG00000156113
cg22768222	1.88813	1.32592e-05	0.0339382	chr6	45383690	N_Shelf	Body	NM_001015051	RUNX2	860	ENSG00000124813
cg22768222	1.88813	1.32592e-05	0.0339382	chr6	45383690	N_Shelf	Body	NM_001024630	RUNX2	860	ENSG00000124813
cg03158980	1.87838	5.07865e-05	0.0461418	chr4	20433161	OpenSea	Body	NM_001289136	SLIT2	9353	ENSG00000145147
cg03158980	1.87838	5.07865e-05	0.0461418	chr4	20433161	OpenSea	Body	NM_001289135	SLIT2	9353	ENSG00000145147
cg03158980	1.87838	5.07865e-05	0.0461418	chr4	20433161	OpenSea	Body	NM_004787	SLIT2	9353	ENSG00000145147
cg20982046	1.8691	3.13787e-06	0.0243866	chr8	74282931	OpenSea
cg07468955	1.86487	4.69449e-05	0.0457729	chr2	165640990	OpenSea	Body	NM_014900	COBLL1	22837	ENSG00000082438
cg07468955	1.86487	4.69449e-05	0.0457729	chr2	165640990	OpenSea	Body	NM_001278461	COBLL1	22837	ENSG00000082438
cg07468955	1.86487	4.69449e-05	0.0457729	chr2	165640990	OpenSea	Body	NM_001278458	COBLL1	22837	ENSG00000082438
cg07468955	1.86487	4.69449e-05	0.0457729	chr2	165640990	OpenSea	Body	NM_001278460	COBLL1	22837	ENSG00000082438
cg12559827	1.86291	7.09147e-05	0.0511371	chr2	73316585	OpenSea	Body	NM_015470	RAB11FIP5	26056	ENSG00000135631
cg15928437	1.85605	7.38217e-05	0.0514369	chr20	49962661	OpenSea
cg25823070	1.84959	5.19649e-05	0.0464145	chr7	17339384	S_Shore	Body	NM_001621	AHR	196	ENSG00000106546
cg26045503	1.84176	4.58454e-05	0.045587	chr18	11309047	OpenSea
cg05340232	1.83795	3.0531e-05	0.0424127	chr4	153110198	OpenSea
cg06784576	1.83729	2.64503e-06	0.0238167	chr3	113465925	S_Shore	5'UTR	NM_001690	ATP6V1A	523	ENSG00000114573
cg06784576	1.83729	2.64503e-06	0.0238167	chr3	113465925	S_Shore	TSS1500	NM_025146	NAA50	80218	ENSG00000121579
cg15188810	1.81325	2.51637e-05	0.0395868	chr15	48677114	OpenSea
cg07107756	1.80821	6.5605e-05	0.0499283	chr17	78161227	N_Shelf	TSS1500	NM_052819	CARD14	79092	ENSG00000141527
cg07107756	1.80821	6.5605e-05	0.0499283	chr17	78161227	N_Shelf	Body	NM_024110	CARD14	79092	ENSG00000141527
cg11366517	1.80191	8.67232e-05	0.0517394	chr1	246810999	OpenSea	Body	NM_001139459	CNST	163882	ENSG00000162852
cg11366517	1.80191	8.67232e-05	0.0517394	chr1	246810999	OpenSea	Body	NM_152609	CNST	163882	ENSG00000162852
cg13669060	1.79195	8.46627e-05	0.0516209	chr9	102131971	OpenSea
cg00339782	1.79178	1.66883e-05	0.0359613	chr1	149908099	OpenSea	Body	NM_001145862	MTMR11	10903	ENSG00000014914
cg00339782	1.79178	1.66883e-05	0.0359613	chr1	149908099	OpenSea	5'UTR	NM_181873	MTMR11	10903	ENSG00000014914
cg00339782	1.79178	1.66883e-05	0.0359613	chr1	149908099	OpenSea	1stExon	NM_181873	MTMR11	10903	ENSG00000014914
cg15705810	1.78425	3.71267e-05	0.0438988	chr2	153357492	OpenSea	Body	NM_052905	FMNL2	114793	ENSG00000157827
cg11862917	1.77943	5.98436e-05	0.0492361	chr1	54715550	OpenSea	Body	NM_018070	SSBP3	23648	ENSG00000157216
cg11862917	1.77943	5.98436e-05	0.0492361	chr1	54715550	OpenSea	Body	NM_001009955	SSBP3	23648	ENSG00000157216
cg11862917	1.77943	5.98436e-05	0.0492361	chr1	54715550	OpenSea	Body	NM_145716	SSBP3	23648	ENSG00000157216
cg21042336	1.76371	7.90871e-05	0.0514828	chr18	21978403	S_Shore	TSS1500	NM_080597	OSBPL1A	114876	ENSG00000141447
cg11217744	1.7615	5.96218e-05	0.0492043	chr14	25597562	OpenSea
cg20927320	1.76089	7.64394e-06	0.0285511	chr6	112141223	OpenSea	5'UTR	NM_002037	FYN	2534	ENSG00000010810
cg18400442	1.7603	9.11777e-06	0.0305952	chr1	243859035	OpenSea	ExonBnd	NM_181690	AKT3	10000	ENSG00000117020
cg18400442	1.7603	9.11777e-06	0.0305952	chr1	243859035	OpenSea	ExonBnd	NM_181690	AKT3	10000	ENSG00000275199
cg18400442	1.7603	9.11777e-06	0.0305952	chr1	243859035	OpenSea	ExonBnd	NM_001206729	AKT3	10000	ENSG00000117020
cg18400442	1.7603	9.11777e-06	0.0305952	chr1	243859035	OpenSea	ExonBnd	NM_001206729	AKT3	10000	ENSG00000275199
cg18400442	1.7603	9.11777e-06	0.0305952	chr1	243859035	OpenSea	ExonBnd	NM_005465	AKT3	10000	ENSG00000117020
cg18400442	1.7603	9.11777e-06	0.0305952	chr1	243859035	OpenSea	ExonBnd	NM_005465	AKT3	10000	ENSG00000275199
cg18400442	1.7603	9.11777e-06	0.0305952	chr1	243859035	OpenSea	Body	NM_181690	AKT3	10000	ENSG00000117020
cg18400442	1.7603	9.11777e-06	0.0305952	chr1	243859035	OpenSea	Body	NM_181690	AKT3	10000	ENSG00000275199
cg18400442	1.7603	9.11777e-06	0.0305952	chr1	243859035	OpenSea	Body	NM_001206729	AKT3	10000	ENSG00000117020
cg18400442	1.7603	9.11777e-06	0.0305952	chr1	243859035	OpenSea	Body	NM_001206729	AKT3	10000	ENSG00000275199
cg18400442	1.7603	9.11777e-06	0.0305952	chr1	243859035	OpenSea	Body	NM_005465	AKT3	10000	ENSG00000117020
cg18400442	1.7603	9.11777e-06	0.0305952	chr1	243859035	OpenSea	Body	NM_005465	AKT3	10000	ENSG00000275199
cg25398978	1.75665	1.71089e-05	0.0360963	chr17	39077474	OpenSea
cg27151770	1.75622	1.21506e-05	0.0329401	chr16	49620536	OpenSea	Body	NM_015069	ZNF423	23090	ENSG00000102935
cg21253474	1.75304	2.01783e-05	0.0373376	chr1	208111512	OpenSea
cg23459083	1.74845	4.836e-05	0.0459825	chr2	48951719	OpenSea	Body	NM_000233	LHCGR	3973	ENSG00000138039
cg23459083	1.74845	4.836e-05	0.0459825	chr2	48951719	OpenSea	Body	NM_001198593	STON1-GTF2A1L	286749	ENSG00000068781
cg09775841	1.74633	4.65083e-05	0.0456278	chr11	36394356	N_Shelf	5'UTR	NM_001160167	PRR5L	79899	ENSG00000135362
cg17633994	1.74516	9.01299e-06	0.0305952	chr18	34148596	OpenSea	Body	NM_001281740	FHOD3	80206	ENSG00000134775
cg17633994	1.74516	9.01299e-06	0.0305952	chr18	34148596	OpenSea	Body	NM_001281739	FHOD3	80206	ENSG00000134775
cg17633994	1.74516	9.01299e-06	0.0305952	chr18	34148596	OpenSea	Body	NM_025135	FHOD3	80206	ENSG00000134775
cg16657032	1.74291	9.01822e-05	0.0517394	chr6	132341474	OpenSea
cg04501964	1.73726	4.37046e-05	0.0455587	chr21	44161572	OpenSea	5'UTR	NM_001001572	PDE9A	5152	ENSG00000160191
cg04501964	1.73726	4.37046e-05	0.0455587	chr21	44161572	OpenSea	5'UTR	NM_001001579	PDE9A	5152	ENSG00000160191
cg04501964	1.73726	4.37046e-05	0.0455587	chr21	44161572	OpenSea	5'UTR	NM_001001584	PDE9A	5152	ENSG00000160191
cg04501964	1.73726	4.37046e-05	0.0455587	chr21	44161572	OpenSea	5'UTR	NM_001001585	PDE9A	5152	ENSG00000160191
cg04501964	1.73726	4.37046e-05	0.0455587	chr21	44161572	OpenSea	5'UTR	NM_001001573	PDE9A	5152	ENSG00000160191
cg04501964	1.73726	4.37046e-05	0.0455587	chr21	44161572	OpenSea	Body	NM_002606	PDE9A	5152	ENSG00000160191
cg04501964	1.73726	4.37046e-05	0.0455587	chr21	44161572	OpenSea	Body	NM_001001570	PDE9A	5152	ENSG00000160191
cg04501964	1.73726	4.37046e-05	0.0455587	chr21	44161572	OpenSea	Body	NM_001001574	PDE9A	5152	ENSG00000160191
cg04501964	1.73726	4.37046e-05	0.0455587	chr21	44161572	OpenSea	Body	NM_001001569	PDE9A	5152	ENSG00000160191
cg04501964	1.73726	4.37046e-05	0.0455587	chr21	44161572	OpenSea	Body	NM_001001568	PDE9A	5152	ENSG00000160191
cg04501964	1.73726	4.37046e-05	0.0455587	chr21	44161572	OpenSea	Body	NM_001001567	PDE9A	5152	ENSG00000160191
cg04501964	1.73726	4.37046e-05	0.0455587	chr21	44161572	OpenSea	Body	NM_001001583	PDE9A	5152	ENSG00000160191
cg04501964	1.73726	4.37046e-05	0.0455587	chr21	44161572	OpenSea	Body	NM_001001582	PDE9A	5152	ENSG00000160191
cg04501964	1.73726	4.37046e-05	0.0455587	chr21	44161572	OpenSea	Body	NM_001001581	PDE9A	5152	ENSG00000160191
cg04501964	1.73726	4.37046e-05	0.0455587	chr21	44161572	OpenSea	Body	NM_001001575	PDE9A	5152	ENSG00000160191
cg04501964	1.73726	4.37046e-05	0.0455587	chr21	44161572	OpenSea	Body	NM_001001578	PDE9A	5152	ENSG00000160191
cg04501964	1.73726	4.37046e-05	0.0455587	chr21	44161572	OpenSea	Body	NM_001001577	PDE9A	5152	ENSG00000160191
cg04501964	1.73726	4.37046e-05	0.0455587	chr21	44161572	OpenSea	Body	NM_001001571	PDE9A	5152	ENSG00000160191
cg04501964	1.73726	4.37046e-05	0.0455587	chr21	44161572	OpenSea	Body	NM_001001576	PDE9A	5152	ENSG00000160191
cg04501964	1.73726	4.37046e-05	0.0455587	chr21	44161572	OpenSea	Body	NM_001001580	PDE9A	5152	ENSG00000160191
cg14894918	1.72605	1.30612e-05	0.0336021	chr10	33973115	OpenSea
cg08880153	1.72187	6.1902e-06	0.0281203	chr15	43808806	OpenSea	TSS1500	NM_002373	MAP1A	4130	ENSG00000166963
cg04026927	1.71839	9.10399e-05	0.0517394	chr10	95274920	OpenSea	Body	NM_001127182	CEP55	55165	ENSG00000138180
cg04026927	1.71839	9.10399e-05	0.0517394	chr10	95274920	OpenSea	Body	NM_018131	CEP55	55165	ENSG00000138180
cg04110213	1.71698	5.16074e-05	0.0464145	chr14	104024505	N_Shelf	3'UTR	NM_001015049	BAG5	9529	ENSG00000166170
cg04110213	1.71698	5.16074e-05	0.0464145	chr14	104024505	N_Shelf	3'UTR	NM_001015048	BAG5	9529	ENSG00000166170
cg04110213	1.71698	5.16074e-05	0.0464145	chr14	104024505	N_Shelf	3'UTR	NM_004873	BAG5	9529	ENSG00000166170
cg04911722	1.70637	6.699e-06	0.0285213	chr1	224008988	OpenSea	Body	NM_001031685	TP53BP2	7159	ENSG00000143514
cg04911722	1.70637	6.699e-06	0.0285213	chr1	224008988	OpenSea	5'UTR	NM_005426	TP53BP2	7159	ENSG00000143514
cg14016875	1.70513	5.45687e-05	0.0475441	chr17	14206981	Island	Body	NM_006041	HS3ST3B1	9953	ENSG00000125430
cg14016875	1.70513	5.45687e-05	0.0475441	chr17	14206981	Island	TSS200	NR_026880	MGC12916	84815	ENSG00000266709
cg20353612	1.69681	2.28497e-05	0.0385709	chr20	14534900	OpenSea	TSS200	NR_104193	MACROD2-IT1	140848	ENSG00000227927
cg20353612	1.69681	2.28497e-05	0.0385709	chr20	14534900	OpenSea	Body	NM_080676	MACROD2	140733	ENSG00000172264
cg02182005	1.69364	2.85638e-05	0.0411722	chr12	102327883	OpenSea
cg15608301	1.68993	1.56934e-05	0.0353272	chr13	100085187	OpenSea
cg26882352	1.68198	9.23985e-05	0.0519082	chr15	59510631	OpenSea	Body	NM_004998	MYO1E	4643	ENSG00000157483
cg14348828	1.67314	8.94409e-05	0.0517394	chr7	142985245	Island	TSS200	NM_032983	CASP2	835	ENSG00000106144
cg14348828	1.67314	8.94409e-05	0.0517394	chr7	142985245	Island	TSS200	NM_032982	CASP2	835	ENSG00000106144
cg23636741	1.64973	2.13869e-05	0.0384291	chr10	33418908	OpenSea
cg08966666	1.64779	3.82224e-06	0.0245587	chr21	35353799	OpenSea
cg16071720	1.64604	8.17824e-05	0.0514828	chr12	102136958	S_Shelf
cg02113995	1.64575	3.0472e-05	0.0424127	chr10	120241565	OpenSea
cg17652048	1.63753	9.06681e-05	0.0517394	chr6	11607982	OpenSea
cg12448342	1.63254	7.11803e-05	0.0511371	chr6	138863140	OpenSea	Body	NM_020464	NHSL1	57224	ENSG00000135540
cg21043178	1.63015	2.80973e-06	0.0243866	chr15	69697383	OpenSea	3'UTR	NM_017705	PAQR5	54852	ENSG00000137819
cg21043178	1.63015	2.80973e-06	0.0243866	chr15	69697383	OpenSea	3'UTR	NM_001104554	PAQR5	54852	ENSG00000137819
cg02023149	1.62778	3.04824e-05	0.0424127	chr3	15135889	OpenSea	Body	NM_022340	RBSN	64145	ENSG00000131381
cg02023149	1.62778	3.04824e-05	0.0424127	chr3	15135889	OpenSea	Body	NM_001302378	RBSN	64145	ENSG00000131381
cg00369310	1.62679	5.71029e-05	0.0484471	chr5	149426819	OpenSea	Body	NM_014983	HMGXB3	22993	ENSG00000113716
cg17343324	1.62137	2.29466e-05	0.0385709	chr8	78311298	OpenSea
cg21836903	1.62048	2.47196e-06	0.0238167	chr3	71180071	OpenSea	Body	NM_032682	FOXP1	27086	ENSG00000114861
cg22752827	1.61898	2.94904e-05	0.04177	chr6	109449575	OpenSea	TSS1500	NM_173830	C6orf182	285753	ENSG00000183137
cg22752827	1.61898	2.94904e-05	0.04177	chr6	109449575	OpenSea	5'UTR	NM_001083535	C6orf182	285753	ENSG00000183137
cg18223639	1.61714	9.0665e-05	0.0517394	chr17	74049778	OpenSea	TSS200	NM_001260503	SRP68	6730	ENSG00000167881
cg18223639	1.61714	9.0665e-05	0.0517394	chr17	74049778	OpenSea	Body	NR_048541	SRP68	6730	ENSG00000167881
cg18223639	1.61714	9.0665e-05	0.0517394	chr17	74049778	OpenSea	Body	NM_014230	SRP68	6730	ENSG00000167881
cg18223639	1.61714	9.0665e-05	0.0517394	chr17	74049778	OpenSea	Body	NM_001260502	SRP68	6730	ENSG00000167881
cg11241896	1.61659	3.64401e-05	0.0438988	chr15	34013525	OpenSea	Body	NM_001243996	RYR3	6263	ENSG00000198838
cg11241896	1.61659	3.64401e-05	0.0438988	chr15	34013525	OpenSea	Body	NM_001036	RYR3	6263	ENSG00000198838
cg23172911	1.61421	8.28554e-05	0.0516209	chr1	165880082	OpenSea
cg05828278	1.61013	3.77106e-05	0.0438988	chr11	112226780	OpenSea	Body	NR_126004	LOC283140	283140	ENSG00000250303
cg07806915	1.6022	1.63053e-06	0.0238167	chr18	46276132	OpenSea	Body	NM_001142397	CTIF	9811	ENSG00000282825
cg03518156	1.59671	2.80669e-05	0.0411722	chr1	161991927	N_Shore	Body	NM_001297713	OLFML2B	25903	ENSG00000162745
cg03518156	1.59671	2.80669e-05	0.0411722	chr1	161991927	N_Shore	Body	NM_015441	OLFML2B	25903	ENSG00000162745
cg04456219	1.58969	3.22801e-05	0.043638	chr7	17274337	OpenSea
cg03580624	1.58821	6.23918e-05	0.0499283	chr19	8488356	OpenSea	Body	NM_001005415	MARCH2	51257	ENSG00000099785
cg03580624	1.58821	6.23918e-05	0.0499283	chr19	8488356	OpenSea	Body	NM_001005416	MARCH2	51257	ENSG00000099785
cg03580624	1.58821	6.23918e-05	0.0499283	chr19	8488356	OpenSea	Body	NM_016496	MARCH2	51257	ENSG00000099785
cg02563706	1.58734	3.35398e-05	0.0438988	chr9	12934137	OpenSea
cg15163306	1.58167	7.63861e-05	0.0514828	chr1	62729166	OpenSea	Body	NM_181712	KANK4	163782	ENSG00000132854
cg14294658	1.57841	6.72595e-05	0.0500222	chr11	17994507	OpenSea	Body	NM_012139	SERGEF	26297	ENSG00000129158
cg04717548	1.56438	2.95288e-05	0.04177	chr18	42317247	OpenSea	Body	NM_001130110	SETBP1	26040	ENSG00000152217
cg04717548	1.56438	2.95288e-05	0.04177	chr18	42317247	OpenSea	Body	NM_015559	SETBP1	26040	ENSG00000152217
cg03722293	1.53744	9.49398e-06	0.0310861	chr4	111402015	S_Shelf	Body	NM_001977	ENPEP	2028	ENSG00000138792
cg25028180	1.52915	2.76824e-05	0.0411722	chr7	96017850	OpenSea
cg03938525	1.52643	3.93496e-06	0.0245587	chr15	79262857	OpenSea	Body	NM_153815	RASGRF1	5923	ENSG00000058335
cg03938525	1.52643	3.93496e-06	0.0245587	chr15	79262857	OpenSea	Body	NM_001145648	RASGRF1	5923	ENSG00000058335
cg03938525	1.52643	3.93496e-06	0.0245587	chr15	79262857	OpenSea	Body	NM_002891	RASGRF1	5923	ENSG00000058335
cg01440489	1.52494	9.59975e-05	0.0521905	chr13	41593385	OpenSea	5'UTR	NM_172373	ELF1	1997	ENSG00000120690
cg01440489	1.52494	9.59975e-05	0.0521905	chr13	41593385	OpenSea	1stExon	NM_172373	ELF1	1997	ENSG00000120690
cg23015897	1.52356	5.71977e-05	0.0484471	chr19	48103819	Island
cg22209898	1.52288	9.91941e-05	0.0521905	chr1	33405542	OpenSea	Body	NM_001300826	RNF19B	127544	ENSG00000116514
cg22209898	1.52288	9.91941e-05	0.0521905	chr1	33405542	OpenSea	Body	NM_153341	RNF19B	127544	ENSG00000116514
cg22209898	1.52288	9.91941e-05	0.0521905	chr1	33405542	OpenSea	Body	NM_001127361	RNF19B	127544	ENSG00000116514
cg14194051	1.52086	9.62606e-05	0.0521905	chr3	192548509	OpenSea	Body	NM_178496	MB21D2	151963	ENSG00000180611
cg13311500	1.51876	5.33159e-05	0.0470501	chr6	20127401	OpenSea	Body	NR_073465	MBOAT1	154141	ENSG00000172197
cg13311500	1.51876	5.33159e-05	0.0470501	chr6	20127401	OpenSea	Body	NM_001080480	MBOAT1	154141	ENSG00000172197
cg04398180	1.51644	7.78936e-05	0.0514828	chr13	114103452	OpenSea	1stExon	NM_199162	ADPRHL1	113622	ENSG00000153531
cg04398180	1.51644	7.78936e-05	0.0514828	chr13	114103452	OpenSea	5'UTR	NM_199162	ADPRHL1	113622	ENSG00000153531
cg04398180	1.51644	7.78936e-05	0.0514828	chr13	114103452	OpenSea	Body	NM_138430	ADPRHL1	113622	ENSG00000153531
cg17604758	1.5154	2.39129e-05	0.0392027	chr7	36462288	OpenSea	Body	NM_001284302	ANLN	54443	ENSG00000011426
cg17604758	1.5154	2.39129e-05	0.0392027	chr7	36462288	OpenSea	Body	NM_001284301	ANLN	54443	ENSG00000011426
cg17604758	1.5154	2.39129e-05	0.0392027	chr7	36462288	OpenSea	Body	NM_018685	ANLN	54443	ENSG00000011426
cg26224455	1.51409	4.79915e-05	0.0459258	chr2	166477679	OpenSea	Body	NM_024969	CSRNP3	80034	ENSG00000178662
cg26224455	1.51409	4.79915e-05	0.0459258	chr2	166477679	OpenSea	Body	NM_001172173	CSRNP3	80034	ENSG00000178662
cg04091682	1.5124	2.14167e-05	0.0384291	chr17	68044063	OpenSea
cg08872493	1.50913	8.15739e-05	0.0514828	chr1	23521417	OpenSea	TSS200	NM_000864	HTR1D	3352	ENSG00000179546
cg09879666	1.50734	4.5897e-05	0.045587	chr3	157218259	OpenSea	TSS1500	NM_024621	VEPH1	79674	ENSG00000197415
cg09879666	1.50734	4.5897e-05	0.045587	chr3	157218259	OpenSea	5'UTR	NM_001167912	VEPH1	79674	ENSG00000197415
cg09879666	1.50734	4.5897e-05	0.045587	chr3	157218259	OpenSea	5'UTR	NM_001167911	VEPH1	79674	ENSG00000197415
cg09879666	1.50734	4.5897e-05	0.045587	chr3	157218259	OpenSea	5'UTR	NM_001167916	VEPH1	79674	ENSG00000197415
cg09879666	1.50734	4.5897e-05	0.045587	chr3	157218259	OpenSea	5'UTR	NM_001167915	VEPH1	79674	ENSG00000197415
cg16704703	1.50713	3.92681e-05	0.044119	chr10	3509710	OpenSea
cg09513855	1.50597	2.28185e-05	0.0385709	chr6	170476472	S_Shore	Body	NR_125878	LOC102724511	102724511	ENSG00000232197
cg06342063	1.50528	5.60895e-05	0.0480541	chr1	9399391	OpenSea	5'UTR	NM_025106	SPSB1	80176	ENSG00000171621
cg08697406	1.5038	3.75428e-05	0.0438988	chr5	143519592	OpenSea
cg00420391	1.50178	8.15094e-05	0.0514828	chr13	40726420	OpenSea
cg02766459	1.50133	2.84684e-05	0.0411722	chr1	179128574	OpenSea	Body	NM_001168237	ABL2	27	ENSG00000143322
cg02766459	1.50133	2.84684e-05	0.0411722	chr1	179128574	OpenSea	Body	NM_007314	ABL2	27	ENSG00000143322
cg02766459	1.50133	2.84684e-05	0.0411722	chr1	179128574	OpenSea	Body	NM_001168238	ABL2	27	ENSG00000143322
cg02766459	1.50133	2.84684e-05	0.0411722	chr1	179128574	OpenSea	Body	NM_001168236	ABL2	27	ENSG00000143322
cg02766459	1.50133	2.84684e-05	0.0411722	chr1	179128574	OpenSea	Body	NM_001136001	ABL2	27	ENSG00000143322
cg06532539	1.49866	1.84943e-05	0.0367631	chr1	59825928	OpenSea	Body	NM_018291	FGGY	55277	ENSG00000172456
cg06532539	1.49866	1.84943e-05	0.0367631	chr1	59825928	OpenSea	Body	NM_001244714	FGGY	55277	ENSG00000172456
cg06532539	1.49866	1.84943e-05	0.0367631	chr1	59825928	OpenSea	Body	NM_001113411	FGGY	55277	ENSG00000172456
cg06532539	1.49866	1.84943e-05	0.0367631	chr1	59825928	OpenSea	Body	NR_103473	FGGY	55277	ENSG00000172456
cg24415757	1.49257	3.30295e-05	0.0438988	chr13	52945804	OpenSea
cg26767049	1.48923	5.93776e-06	0.0277724	chr12	120665313	OpenSea	Body	NM_002859	PXN	5829	ENSG00000089159
cg26767049	1.48923	5.93776e-06	0.0277724	chr12	120665313	OpenSea	Body	NM_001243756	PXN	5829	ENSG00000089159
cg26767049	1.48923	5.93776e-06	0.0277724	chr12	120665313	OpenSea	Body	NM_001080855	PXN	5829	ENSG00000089159
cg26767049	1.48923	5.93776e-06	0.0277724	chr12	120665313	OpenSea	5'UTR	NM_025157	PXN	5829	ENSG00000089159
cg01931028	1.48825	8.07955e-05	0.0514828	chr4	1287888	S_Shelf	Body	NM_005882	MAEA	10296	ENSG00000090316
cg01931028	1.48825	8.07955e-05	0.0514828	chr4	1287888	S_Shelf	Body	NM_001017405	MAEA	10296	ENSG00000090316
cg10026009	1.48628	1.02378e-05	0.032064	chr9	105800346	OpenSea
cg17927583	1.48626	2.86598e-05	0.0411722	chr4	79490198	OpenSea	Body	NM_005139	ANXA3	306	ENSG00000138772
cg14940505	1.48463	3.96098e-05	0.0441878	chr11	115069151	OpenSea	ExonBnd	NM_001301043	CADM1	23705	ENSG00000182985
cg14940505	1.48463	3.96098e-05	0.0441878	chr11	115069151	OpenSea	ExonBnd	NM_001301044	CADM1	23705	ENSG00000182985
cg14940505	1.48463	3.96098e-05	0.0441878	chr11	115069151	OpenSea	ExonBnd	NM_001301045	CADM1	23705	ENSG00000182985
cg14940505	1.48463	3.96098e-05	0.0441878	chr11	115069151	OpenSea	Body	NM_001098517	CADM1	23705	ENSG00000182985
cg14940505	1.48463	3.96098e-05	0.0441878	chr11	115069151	OpenSea	Body	NM_014333	CADM1	23705	ENSG00000182985
cg14940505	1.48463	3.96098e-05	0.0441878	chr11	115069151	OpenSea	Body	NM_001301043	CADM1	23705	ENSG00000182985
cg14940505	1.48463	3.96098e-05	0.0441878	chr11	115069151	OpenSea	Body	NM_001301044	CADM1	23705	ENSG00000182985
cg14940505	1.48463	3.96098e-05	0.0441878	chr11	115069151	OpenSea	Body	NM_001301045	CADM1	23705	ENSG00000182985
cg25301163	1.47916	4.17543e-05	0.0448918	chr14	25597490	OpenSea
cg09712197	1.47881	4.70029e-05	0.0457729	chr13	93708676	OpenSea	Body	NR_126360	LINC00363	104326053
cg20115418	1.47475	3.87413e-05	0.0438988	chr2	198702850	OpenSea	Body	NM_006226	PLCL1	5334	ENSG00000115896
cg06623935	1.47201	9.4649e-05	0.0521905	chr1	214159131	N_Shore
cg24460048	1.46646	4.97422e-05	0.0459825	chr15	33291807	OpenSea	Body	NM_001103184	FMN1	342184	ENSG00000248905
cg24460048	1.46646	4.97422e-05	0.0459825	chr15	33291807	OpenSea	Body	NM_001277313	FMN1	342184	ENSG00000248905
cg21125190	1.46156	6.27504e-05	0.0499283	chr4	85484245	OpenSea
cg15463580	1.45996	2.30798e-05	0.0385709	chr19	6113945	S_Shelf
cg20786687	1.45548	3.83734e-05	0.0438988	chr21	43534092	OpenSea	Body	NM_173568	UMODL1	89766	ENSG00000177398
cg20786687	1.45548	3.83734e-05	0.0438988	chr21	43534092	OpenSea	Body	NM_001004416	UMODL1	89766	ENSG00000177398
cg20786687	1.45548	3.83734e-05	0.0438988	chr21	43534092	OpenSea	Body	NM_001199527	UMODL1	89766	ENSG00000177398
cg20786687	1.45548	3.83734e-05	0.0438988	chr21	43534092	OpenSea	Body	NM_001199528	UMODL1	89766	ENSG00000177398
cg02941721	1.45504	1.09158e-05	0.0323778	chrX	15493376	OpenSea	Body	NR_037859	PIR-FIGF	100532742
cg02941721	1.45504	1.09158e-05	0.0323778	chrX	15493376	OpenSea	Body	NM_003662	PIR	8544	ENSG00000087842
cg02941721	1.45504	1.09158e-05	0.0323778	chrX	15493376	OpenSea	Body	NM_001018109	PIR	8544	ENSG00000087842
cg25884442	1.45332	3.35936e-05	0.0438988	chr12	6178606	OpenSea	Body	NM_000552	VWF	7450	ENSG00000110799
cg22204103	1.45072	5.6508e-05	0.0482127	chr4	41540115	OpenSea	Body	NM_014988	LIMCH1	22998	ENSG00000064042
cg22204103	1.45072	5.6508e-05	0.0482127	chr4	41540115	OpenSea	Body	NM_001112718	LIMCH1	22998	ENSG00000064042
cg22204103	1.45072	5.6508e-05	0.0482127	chr4	41540115	OpenSea	Body	NM_001112717	LIMCH1	22998	ENSG00000064042
cg27144055	1.44786	4.1363e-06	0.0245587	chr16	88379519	OpenSea
cg15301904	1.4428	9.91251e-05	0.0521905	chr11	107591505	OpenSea
cg20655220	1.43857	7.25801e-05	0.0514369	chr5	102246737	OpenSea	Body	NM_138822	PAM	5066	ENSG00000145730
cg20655220	1.43857	7.25801e-05	0.0514369	chr5	102246737	OpenSea	Body	NM_138766	PAM	5066	ENSG00000145730
cg20655220	1.43857	7.25801e-05	0.0514369	chr5	102246737	OpenSea	Body	NM_000919	PAM	5066	ENSG00000145730
cg20655220	1.43857	7.25801e-05	0.0514369	chr5	102246737	OpenSea	Body	NM_138821	PAM	5066	ENSG00000145730
cg18208851	1.43534	5.72631e-05	0.0484471	chr6	33590982	S_Shore	Body	NM_002224	ITPR3	3710	ENSG00000096433
cg20522398	1.43375	8.44947e-05	0.0516209	chr7	17316151	OpenSea
cg22488000	1.43167	3.61904e-05	0.0438988	chr3	71180113	OpenSea	TSS200	NM_001244815	FOXP1	27086	ENSG00000114861
cg22488000	1.43167	3.61904e-05	0.0438988	chr3	71180113	OpenSea	Body	NM_032682	FOXP1	27086	ENSG00000114861
cg22488000	1.43167	3.61904e-05	0.0438988	chr3	71180113	OpenSea	Body	NM_001244816	FOXP1	27086	ENSG00000114861
cg22488000	1.43167	3.61904e-05	0.0438988	chr3	71180113	OpenSea	Body	NM_001244814	FOXP1	27086	ENSG00000114861
cg22488000	1.43167	3.61904e-05	0.0438988	chr3	71180113	OpenSea	Body	NM_001244812	FOXP1	27086	ENSG00000114861
cg22488000	1.43167	3.61904e-05	0.0438988	chr3	71180113	OpenSea	Body	NM_001244810	FOXP1	27086	ENSG00000114861
cg22488000	1.43167	3.61904e-05	0.0438988	chr3	71180113	OpenSea	Body	NM_001244808	FOXP1	27086	ENSG00000114861
cg21798630	1.42866	4.27336e-05	0.0453073	chr3	190363742	OpenSea	Body	NM_001167931	IL1RAP	3556	ENSG00000196083
cg21798630	1.42866	4.27336e-05	0.0453073	chr3	190363742	OpenSea	Body	NM_001167928	IL1RAP	3556	ENSG00000196083
cg21798630	1.42866	4.27336e-05	0.0453073	chr3	190363742	OpenSea	Body	NM_002182	IL1RAP	3556	ENSG00000196083
cg21798630	1.42866	4.27336e-05	0.0453073	chr3	190363742	OpenSea	Body	NM_001167929	IL1RAP	3556	ENSG00000196083
cg25986168	1.42688	6.96168e-05	0.0508749	chr6	44137082	OpenSea	Body	NM_007058	CAPN11	11131	ENSG00000137225
cg09774007	1.42659	3.34866e-05	0.0438988	chr12	106979229	N_Shore	Body	NM_213594	RFX4	5992	ENSG00000111783
cg19822309	1.42146	9.34409e-05	0.0521905	chr19	46181546	S_Shore	Body	NM_000164	GIPR	2696	ENSG00000010310
cg21040230	1.41851	3.83094e-05	0.0438988	chr7	56243786	S_Shore
cg12509703	1.41525	1.67962e-05	0.0360168	chr5	171868225	OpenSea	Body	NM_001308175	SH3PXD2B	285590	ENSG00000174705
cg12509703	1.41525	1.67962e-05	0.0360168	chr5	171868225	OpenSea	Body	NM_001017995	SH3PXD2B	285590	ENSG00000174705
cg08248287	1.40602	2.8391e-05	0.0411722	chr3	171024841	OpenSea	Body	NM_001161560	TNIK	23043	ENSG00000154310
cg08248287	1.40602	2.8391e-05	0.0411722	chr3	171024841	OpenSea	Body	NM_015028	TNIK	23043	ENSG00000154310
cg08248287	1.40602	2.8391e-05	0.0411722	chr3	171024841	OpenSea	Body	NM_001161563	TNIK	23043	ENSG00000154310
cg08248287	1.40602	2.8391e-05	0.0411722	chr3	171024841	OpenSea	Body	NM_001161562	TNIK	23043	ENSG00000154310
cg08248287	1.40602	2.8391e-05	0.0411722	chr3	171024841	OpenSea	Body	NM_001161561	TNIK	23043	ENSG00000154310
cg08248287	1.40602	2.8391e-05	0.0411722	chr3	171024841	OpenSea	Body	NM_001161566	TNIK	23043	ENSG00000154310
cg08248287	1.40602	2.8391e-05	0.0411722	chr3	171024841	OpenSea	Body	NM_001161565	TNIK	23043	ENSG00000154310
cg08248287	1.40602	2.8391e-05	0.0411722	chr3	171024841	OpenSea	Body	NM_001161564	TNIK	23043	ENSG00000154310
cg16511396	1.40339	2.86458e-05	0.0411722	chr6	136133752	OpenSea
cg19320362	1.40244	5.46332e-05	0.0475441	chr4	102882465	OpenSea	Body	NM_001127507	BANK1	55024	ENSG00000153064
cg19320362	1.40244	5.46332e-05	0.0475441	chr4	102882465	OpenSea	Body	NM_017935	BANK1	55024	ENSG00000153064
cg19320362	1.40244	5.46332e-05	0.0475441	chr4	102882465	OpenSea	Body	NM_001083907	BANK1	55024	ENSG00000153064
cg02402058	1.39786	1.51813e-05	0.0347956	chr6	64621114	OpenSea	Body	NM_001292009	EYS	346007	ENSG00000188107
cg02402058	1.39786	1.51813e-05	0.0347956	chr6	64621114	OpenSea	Body	NM_001142800	EYS	346007	ENSG00000188107
cg19252218	1.39528	4.89962e-05	0.0459825	chr17	41477271	Island	Body	NM_001661	ARL4D	379	ENSG00000175906
cg15124636	1.39	5.98557e-05	0.0492361	chr1	246734875	OpenSea	5'UTR	NM_152609	CNST	163882	ENSG00000162852
cg15124636	1.39	5.98557e-05	0.0492361	chr1	246734875	OpenSea	5'UTR	NM_001139459	CNST	163882	ENSG00000162852
cg21993077	1.3833	3.51614e-05	0.0438988	chr3	71180282	OpenSea	TSS200	NM_001244815	FOXP1	27086	ENSG00000114861
cg21993077	1.3833	3.51614e-05	0.0438988	chr3	71180282	OpenSea	Body	NM_032682	FOXP1	27086	ENSG00000114861
cg21993077	1.3833	3.51614e-05	0.0438988	chr3	71180282	OpenSea	Body	NM_001244816	FOXP1	27086	ENSG00000114861
cg21993077	1.3833	3.51614e-05	0.0438988	chr3	71180282	OpenSea	Body	NM_001244814	FOXP1	27086	ENSG00000114861
cg21993077	1.3833	3.51614e-05	0.0438988	chr3	71180282	OpenSea	Body	NM_001244812	FOXP1	27086	ENSG00000114861
cg21993077	1.3833	3.51614e-05	0.0438988	chr3	71180282	OpenSea	Body	NM_001244810	FOXP1	27086	ENSG00000114861
cg21993077	1.3833	3.51614e-05	0.0438988	chr3	71180282	OpenSea	Body	NM_001244808	FOXP1	27086	ENSG00000114861
cg10354017	1.38314	6.69064e-05	0.0499283	chr6	88077101	OpenSea
cg23963252	1.38089	3.68575e-05	0.0438988	chr3	40919573	OpenSea
cg07481398	1.37884	8.27737e-05	0.0516209	chr6	149806652	OpenSea	TSS1500	NM_207360	ZC3H12D	340152	ENSG00000178199
cg19493442	1.37857	2.45344e-05	0.0395868	chr14	102510101	OpenSea	Body	NM_001376	DYNC1H1	1778	ENSG00000197102
cg08558886	1.37824	2.09141e-05	0.0380714	chr2	151469837	OpenSea
cg16402161	1.37156	2.25144e-05	0.0385709	chr4	185677585	OpenSea	3'UTR	NM_001286710	ACSL1	2180	ENSG00000151726
cg16402161	1.37156	2.25144e-05	0.0385709	chr4	185677585	OpenSea	3'UTR	NM_001286712	ACSL1	2180	ENSG00000151726
cg16402161	1.37156	2.25144e-05	0.0385709	chr4	185677585	OpenSea	3'UTR	NM_001286711	ACSL1	2180	ENSG00000151726
cg16402161	1.37156	2.25144e-05	0.0385709	chr4	185677585	OpenSea	3'UTR	NM_001995	ACSL1	2180	ENSG00000151726
cg16402161	1.37156	2.25144e-05	0.0385709	chr4	185677585	OpenSea	3'UTR	NM_001286708	ACSL1	2180	ENSG00000151726
cg13504976	1.3714	5.18641e-05	0.0464145	chr14	102378914	OpenSea	Body	NM_001161726	PPP2R5C	5527	ENSG00000078304
cg13504976	1.3714	5.18641e-05	0.0464145	chr14	102378914	OpenSea	3'UTR	NM_178587	PPP2R5C	5527	ENSG00000078304
cg13504976	1.3714	5.18641e-05	0.0464145	chr14	102378914	OpenSea	Body	NM_002719	PPP2R5C	5527	ENSG00000078304
cg13504976	1.3714	5.18641e-05	0.0464145	chr14	102378914	OpenSea	Body	NM_001161725	PPP2R5C	5527	ENSG00000078304
cg13504976	1.3714	5.18641e-05	0.0464145	chr14	102378914	OpenSea	Body	NM_178586	PPP2R5C	5527	ENSG00000078304
cg22777724	1.37005	6.09477e-05	0.0498628	chr17	46622516	S_Shore	TSS200	NM_002145	HOXB2	3212	ENSG00000173917
cg24577663	1.36515	7.52842e-05	0.0514828	chr17	76918627	N_Shelf	Body	NM_003255	TIMP2	7077	ENSG00000035862
cg07939845	1.36383	7.91376e-05	0.0514828	chr10	3182623	S_Shelf	TSS1500	NR_038284	PITRM1-AS1	100507034	ENSG00000237399
cg07939845	1.36383	7.91376e-05	0.0514828	chr10	3182623	S_Shelf	Body	NM_014889	PITRM1	10531	ENSG00000107959
cg07939845	1.36383	7.91376e-05	0.0514828	chr10	3182623	S_Shelf	Body	NM_001242309	PITRM1	10531	ENSG00000107959
cg07939845	1.36383	7.91376e-05	0.0514828	chr10	3182623	S_Shelf	Body	NM_001242307	PITRM1	10531	ENSG00000107959
cg11646759	1.36144	8.8398e-05	0.0517394	chr1	28455602	OpenSea
cg15167075	1.34779	2.49911e-05	0.0395868	chr1	27673859	N_Shelf	Body	NM_032872	SYTL1	84958	ENSG00000142765
cg15167075	1.34779	2.49911e-05	0.0395868	chr1	27673859	N_Shelf	Body	NM_001193308	SYTL1	84958	ENSG00000142765
cg10880603	1.34048	7.43059e-05	0.0514369	chr17	78873754	S_Shelf	Body	NM_001163034	RPTOR	57521	ENSG00000141564
cg10880603	1.34048	7.43059e-05	0.0514369	chr17	78873754	S_Shelf	Body	NM_020761	RPTOR	57521	ENSG00000141564
cg26144315	1.33079	3.85048e-05	0.0438988	chr19	15469994	OpenSea	Body	NM_005858	AKAP8	10270	ENSG00000105127
cg21900073	1.33033	8.3761e-06	0.0305952	chr4	82005992	OpenSea
cg14645994	1.3231	3.65329e-05	0.0438988	chr6	56521080	OpenSea	Body	NR_046940	RNU6-71P
cg14645994	1.3231	3.65329e-05	0.0438988	chr6	56521080	OpenSea	Body	NM_183380	DST	667	ENSG00000151914
cg14645994	1.3231	3.65329e-05	0.0438988	chr6	56521080	OpenSea	Body	NM_001144770	DST	667	ENSG00000151914
cg14645994	1.3231	3.65329e-05	0.0438988	chr6	56521080	OpenSea	Body	NM_001144769	DST	667	ENSG00000151914
cg10802101	1.31737	7.57987e-05	0.0514828	chr3	31108835	OpenSea
cg17741362	1.31635	2.31773e-05	0.0385709	chr12	112211680	OpenSea	Body	NM_000690	ALDH2	217	ENSG00000111275
cg17741362	1.31635	2.31773e-05	0.0385709	chr12	112211680	OpenSea	Body	NM_001204889	ALDH2	217	ENSG00000111275
cg01517416	1.31625	5.29882e-05	0.0469576	chr1	119901629	OpenSea
cg20790648	1.31518	9.83811e-05	0.0521905	chr3	151619923	OpenSea
cg15729697	1.31473	5.24511e-06	0.0259294	chr21	17911454	OpenSea	TSS1500	NR_029480	MIRLET7C	406885	ENSG00000199030
cg15729697	1.31473	5.24511e-06	0.0259294	chr21	17911454	OpenSea	Body	NR_029514	MIR99A	407055	ENSG00000207638
cg15729697	1.31473	5.24511e-06	0.0259294	chr21	17911454	OpenSea	Body	NR_027790	MIR99AHG	388815	ENSG00000215386
cg15729697	1.31473	5.24511e-06	0.0259294	chr21	17911454	OpenSea	Body	NR_111005	MIR99AHG	388815	ENSG00000215386
cg15729697	1.31473	5.24511e-06	0.0259294	chr21	17911454	OpenSea	Body	NR_111004	MIR99AHG	388815	ENSG00000215386
cg15729697	1.31473	5.24511e-06	0.0259294	chr21	17911454	OpenSea	Body	NR_027791	MIR99AHG	388815	ENSG00000215386
cg20629021	1.30632	6.02318e-05	0.0494648	chr11	68580041	OpenSea	Body	NM_001876	CPT1A	1374	ENSG00000110090
cg20629021	1.30632	6.02318e-05	0.0494648	chr11	68580041	OpenSea	Body	NM_001031847	CPT1A	1374	ENSG00000110090
cg14902864	1.30021	6.62925e-05	0.0499283	chr10	18948196	Island	TSS200	NM_178815	ARL5B	221079	ENSG00000165997
cg16145324	1.29457	3.80319e-05	0.0438988	chr6	36020012	OpenSea	Body	NM_139014	MAPK14	1432	ENSG00000112062
cg16145324	1.29457	3.80319e-05	0.0438988	chr6	36020012	OpenSea	Body	NM_139013	MAPK14	1432	ENSG00000112062
cg16145324	1.29457	3.80319e-05	0.0438988	chr6	36020012	OpenSea	Body	NM_139012	MAPK14	1432	ENSG00000112062
cg16145324	1.29457	3.80319e-05	0.0438988	chr6	36020012	OpenSea	Body	NM_001315	MAPK14	1432	ENSG00000112062
cg06169746	1.29321	1.99758e-05	0.037241	chr3	119419493	N_Shelf
cg17000410	1.28858	1.59943e-05	0.0353728	chr21	16796447	OpenSea
cg22076311	1.28774	1.78584e-06	0.0238167	chr3	71180052	OpenSea	Body	NM_032682	FOXP1	27086	ENSG00000114861
cg07375176	1.28501	4.07147e-05	0.0447278	chr14	103537519	OpenSea
cg10102589	1.28451	3.68528e-05	0.0438988	chr17	5685631	OpenSea	Body	NR_040000	LOC339166	339166	ENSG00000284837
cg14842825	1.2753	1.48151e-05	0.0346922	chr2	162179461	OpenSea	Body	NM_005805	PSMD14	10213	ENSG00000115233
cg00183457	1.27343	8.91566e-05	0.0517394	chr2	219991744	OpenSea	Body	NM_024782	NHEJ1	79840	ENSG00000187736
cg12333597	1.26909	4.30713e-05	0.045442	chr16	64504557	OpenSea
cg15832983	1.26507	3.10436e-06	0.0243866	chr5	52572906	OpenSea
cg20483719	1.26177	9.37083e-05	0.0521905	chr13	114799652	N_Shelf	Body	NM_007368	RASA3	22821	ENSG00000185989
cg20483719	1.26177	9.37083e-05	0.0521905	chr13	114799652	N_Shelf	Body	NM_007368	RASA3	22821	ENSG00000280477
cg17379926	1.26162	7.39037e-05	0.0514369	chr1	174934845	OpenSea	Body	NM_001243764	RABGAP1L	9910	ENSG00000152061
cg17379926	1.26162	7.39037e-05	0.0514369	chr1	174934845	OpenSea	Body	NM_001243765	RABGAP1L	9910	ENSG00000152061
cg07355507	1.25967	4.98414e-05	0.0459825	chr6	16804166	OpenSea
cg05901114	1.25959	3.49769e-05	0.0438988	chr10	34874129	OpenSea	Body	NM_019619	PARD3	56288	ENSG00000148498
cg04946953	1.25755	9.09121e-05	0.0517394	chr2	19688392	OpenSea
cg22561966	1.25699	1.20815e-05	0.0329401	chr11	102139342	N_Shore
cg20012607	1.25491	3.08452e-05	0.0424716	chr13	100085455	OpenSea
cg19422380	1.25131	4.02607e-05	0.0446145	chr8	99341540	OpenSea
cg16938898	1.23887	1.53851e-05	0.0351031	chr4	13993112	OpenSea
cg18546589	1.23653	7.95955e-05	0.0514828	chr19	19537275	OpenSea	5'UTR	NM_017660	GATAD2A	54815	ENSG00000167491
cg10200168	1.22982	5.48449e-05	0.0475441	chr12	124927713	N_Shelf	Body	NM_006312	NCOR2	9612	ENSG00000196498
cg10200168	1.22982	5.48449e-05	0.0475441	chr12	124927713	N_Shelf	Body	NM_001077261	NCOR2	9612	ENSG00000196498
cg18166376	1.22435	7.31352e-06	0.0285213	chr3	71180064	OpenSea	Body	NM_032682	FOXP1	27086	ENSG00000114861
cg07341738	1.22197	1.14268e-05	0.032553	chr2	127824713	OpenSea	Body	NM_139351	BIN1	274	ENSG00000136717
cg07341738	1.22197	1.14268e-05	0.032553	chr2	127824713	OpenSea	Body	NM_139350	BIN1	274	ENSG00000136717
cg07341738	1.22197	1.14268e-05	0.032553	chr2	127824713	OpenSea	Body	NM_139349	BIN1	274	ENSG00000136717
cg07341738	1.22197	1.14268e-05	0.032553	chr2	127824713	OpenSea	Body	NM_139348	BIN1	274	ENSG00000136717
cg07341738	1.22197	1.14268e-05	0.032553	chr2	127824713	OpenSea	Body	NM_139347	BIN1	274	ENSG00000136717
cg07341738	1.22197	1.14268e-05	0.032553	chr2	127824713	OpenSea	Body	NM_139346	BIN1	274	ENSG00000136717
cg07341738	1.22197	1.14268e-05	0.032553	chr2	127824713	OpenSea	Body	NM_139345	BIN1	274	ENSG00000136717
cg07341738	1.22197	1.14268e-05	0.032553	chr2	127824713	OpenSea	Body	NM_139344	BIN1	274	ENSG00000136717
cg07341738	1.22197	1.14268e-05	0.032553	chr2	127824713	OpenSea	Body	NM_139343	BIN1	274	ENSG00000136717
cg07341738	1.22197	1.14268e-05	0.032553	chr2	127824713	OpenSea	Body	NM_004305	BIN1	274	ENSG00000136717
cg03314084	1.2199	1.55206e-05	0.0352529	chr1	9996914	OpenSea	5'UTR	NM_032368	LZIC	84328	ENSG00000162441
cg15444358	1.21794	9.6093e-05	0.0521905	chr14	102051071	S_Shore
cg03164649	1.21604	7.89805e-05	0.0514828	chr3	111687580	OpenSea	Body	NM_001134437	PHLDB2	90102	ENSG00000144824
cg03164649	1.21604	7.89805e-05	0.0514828	chr3	111687580	OpenSea	Body	NM_145753	PHLDB2	90102	ENSG00000144824
cg03164649	1.21604	7.89805e-05	0.0514828	chr3	111687580	OpenSea	Body	NM_001134438	PHLDB2	90102	ENSG00000144824
cg03164649	1.21604	7.89805e-05	0.0514828	chr3	111687580	OpenSea	Body	NM_001134439	PHLDB2	90102	ENSG00000144824
cg16883861	1.21336	7.33237e-05	0.0514369	chr2	224950324	OpenSea
cg25670900	1.21177	9.1951e-05	0.0518051	chrX	77914054	OpenSea	5'UTR	NM_152694	ZCCHC5	203430	ENSG00000179300
cg22805341	1.20887	6.2902e-05	0.0499283	chr4	41541049	OpenSea	5'UTR	NM_001289124	LIMCH1	22998	ENSG00000064042
cg22805341	1.20887	6.2902e-05	0.0499283	chr4	41541049	OpenSea	Body	NM_001112718	LIMCH1	22998	ENSG00000064042
cg22805341	1.20887	6.2902e-05	0.0499283	chr4	41541049	OpenSea	Body	NM_001112717	LIMCH1	22998	ENSG00000064042
cg22805341	1.20887	6.2902e-05	0.0499283	chr4	41541049	OpenSea	Body	NM_014988	LIMCH1	22998	ENSG00000064042
cg22805341	1.20887	6.2902e-05	0.0499283	chr4	41541049	OpenSea	Body	NM_001289122	LIMCH1	22998	ENSG00000064042
cg15646593	1.20734	2.43315e-05	0.0395868	chr4	121684353	OpenSea	Body	NM_018699	PRDM5	11107	ENSG00000138738
cg15646593	1.20734	2.43315e-05	0.0395868	chr4	121684353	OpenSea	Body	NM_001300823	PRDM5	11107	ENSG00000138738
cg15646593	1.20734	2.43315e-05	0.0395868	chr4	121684353	OpenSea	Body	NM_001300824	PRDM5	11107	ENSG00000138738
cg06651783	1.20591	8.55986e-05	0.0517394	chr5	55645530	OpenSea
cg02954677	1.20567	4.36241e-05	0.0455587	chr7	107598580	OpenSea	Body	NM_002291	LAMB1	3912	ENSG00000091136
cg11469373	1.2054	9.00181e-05	0.0517394	chr14	68933361	OpenSea	Body	NM_133510	RAD51B	5890	ENSG00000182185
cg11469373	1.2054	9.00181e-05	0.0517394	chr14	68933361	OpenSea	Body	NM_002877	RAD51B	5890	ENSG00000182185
cg11469373	1.2054	9.00181e-05	0.0517394	chr14	68933361	OpenSea	Body	NM_133509	RAD51B	5890	ENSG00000182185
cg11065462	1.20529	8.60375e-05	0.0517394	chr9	14323694	S_Shore	Body	NM_001190738	NFIB	4781	ENSG00000147862
cg00875152	1.19926	9.61023e-05	0.0521905	chr5	42772539	OpenSea	Body	NM_001134848	CCDC152	100129792	ENSG00000198865
cg17807001	1.19611	4.37298e-05	0.0455587	chr17	77037965	OpenSea	5'UTR	NM_198594	C1QTNF1	114897	ENSG00000173918
cg17807001	1.19611	4.37298e-05	0.0455587	chr17	77037965	OpenSea	5'UTR	NM_030968	C1QTNF1	114897	ENSG00000173918
cg17807001	1.19611	4.37298e-05	0.0455587	chr17	77037965	OpenSea	5'UTR	NM_198593	C1QTNF1	114897	ENSG00000173918
cg00179795	1.19576	8.35412e-05	0.0516209	chr10	131695114	N_Shore	Body	NM_001005463	EBF3	253738	ENSG00000108001
cg14630590	1.18884	7.47557e-05	0.0514828	chr15	69697406	OpenSea	3'UTR	NM_017705	PAQR5	54852	ENSG00000137819
cg14630590	1.18884	7.47557e-05	0.0514828	chr15	69697406	OpenSea	3'UTR	NM_001104554	PAQR5	54852	ENSG00000137819
cg08615596	1.18755	4.78254e-05	0.0459258	chr12	68758840	OpenSea
cg18949308	1.18495	4.39186e-05	0.045567	chr19	40847527	OpenSea	Body	NR_046202	C19orf47	126526	ENSG00000160392
cg18949308	1.18495	4.39186e-05	0.045567	chr19	40847527	OpenSea	Body	NM_001256441	C19orf47	126526	ENSG00000160392
cg18949308	1.18495	4.39186e-05	0.045567	chr19	40847527	OpenSea	Body	NM_001256440	C19orf47	126526	ENSG00000160392
cg07567376	1.1812	8.5907e-05	0.0517394	chr10	60271505	N_Shore	TSS1500	NM_001080512	BICC1	80114	ENSG00000122870
cg10537327	1.17904	2.79145e-05	0.0411722	chr10	6193601	OpenSea	Body	NM_001145443	PFKFB3	5209	ENSG00000170525
cg10537327	1.17904	2.79145e-05	0.0411722	chr10	6193601	OpenSea	Body	NM_001282630	PFKFB3	5209	ENSG00000170525
cg10537327	1.17904	2.79145e-05	0.0411722	chr10	6193601	OpenSea	TSS1500	NR_036111	MIR3155A	100422989	ENSG00000263628
cg08038033	1.17866	3.46119e-05	0.0438988	chr3	71354056	OpenSea	5'UTR	NM_032682	FOXP1	27086	ENSG00000114861
cg08038033	1.17866	3.46119e-05	0.0438988	chr3	71354056	OpenSea	5'UTR	NM_001012505	FOXP1	27086	ENSG00000114861
cg08817610	1.17836	1.6464e-05	0.0357784	chr22	28837147	OpenSea	Body	NM_001145418	TTC28	23331	ENSG00000100154
cg16669300	1.16224	1.91682e-05	0.0367631	chr9	134882463	OpenSea	Body	NM_004269	MED27	9442	ENSG00000160563
cg16669300	1.16224	1.91682e-05	0.0367631	chr9	134882463	OpenSea	Body	NM_001253881	MED27	9442	ENSG00000160563
cg16546125	1.15901	5.11713e-05	0.04632	chr1	32586752	OpenSea	Body	NM_012316	KPNA6	23633	ENSG00000025800
cg26504280	1.15749	6.81477e-05	0.0504796	chr22	19802910	OpenSea	Body	NM_053004	GNB1L	54584	ENSG00000185838
cg26388765	1.15395	6.54495e-06	0.0285213	chr4	107487002	OpenSea
cg23010183	1.14664	6.84888e-05	0.0504796	chr14	90039435	OpenSea	5'UTR	NM_001085471	FOXN3	1112	ENSG00000053254
cg00227271	1.14011	3.93805e-05	0.044119	chr6	164006934	OpenSea
cg03811558	1.13661	6.12003e-05	0.0498628	chr16	49674772	S_Shelf	Body	NM_001271620	ZNF423	23090	ENSG00000102935
cg03811558	1.13661	6.12003e-05	0.0498628	chr16	49674772	S_Shelf	Body	NM_015069	ZNF423	23090	ENSG00000102935
cg14571444	1.13479	8.09243e-05	0.0514828	chr10	29937599	OpenSea	5'UTR	NM_003174	SVIL	6840	ENSG00000197321
cg27596890	1.13446	8.94153e-05	0.0517394	chr16	49621173	OpenSea	Body	NM_015069	ZNF423	23090	ENSG00000102935
cg04142890	1.13422	6.8905e-05	0.0504796	chr10	126392126	OpenSea	TSS1500	NR_120631	FAM53B-AS1	101927944
cg04142890	1.13422	6.8905e-05	0.0504796	chr10	126392126	OpenSea	TSS1500	NR_120630	FAM53B-AS1	101927944
cg04142890	1.13422	6.8905e-05	0.0504796	chr10	126392126	OpenSea	Body	NM_014661	FAM53B	9679	ENSG00000189319
cg15551201	1.13274	4.29053e-06	0.024583	chr5	67948405	OpenSea
cg23067085	1.13159	7.26707e-05	0.0514369	chr3	71180032	OpenSea	Body	NM_032682	FOXP1	27086	ENSG00000114861
cg24212268	1.13058	2.70761e-05	0.0410416	chr10	29936149	OpenSea	5'UTR	NM_003174	SVIL	6840	ENSG00000197321
cg06295483	1.11984	4.5316e-06	0.024583	chr6	149386050	OpenSea	Body	NM_005715	UST	10090	ENSG00000111962
cg21610805	1.11174	1.9373e-05	0.036863	chr1	198635026	OpenSea	Body	NR_052021	PTPRC	5788	ENSG00000081237
cg21610805	1.11174	1.9373e-05	0.036863	chr1	198635026	OpenSea	Body	NR_052021	PTPRC	5788	ENSG00000262418
cg21610805	1.11174	1.9373e-05	0.036863	chr1	198635026	OpenSea	Body	NM_001267798	PTPRC	5788	ENSG00000081237
cg21610805	1.11174	1.9373e-05	0.036863	chr1	198635026	OpenSea	Body	NM_001267798	PTPRC	5788	ENSG00000262418
cg21610805	1.11174	1.9373e-05	0.036863	chr1	198635026	OpenSea	Body	NM_080921	PTPRC	5788	ENSG00000081237
cg21610805	1.11174	1.9373e-05	0.036863	chr1	198635026	OpenSea	Body	NM_080921	PTPRC	5788	ENSG00000262418
cg21610805	1.11174	1.9373e-05	0.036863	chr1	198635026	OpenSea	Body	NM_002838	PTPRC	5788	ENSG00000081237
cg21610805	1.11174	1.9373e-05	0.036863	chr1	198635026	OpenSea	Body	NM_002838	PTPRC	5788	ENSG00000262418
cg17169780	1.11106	7.93878e-05	0.0514828	chr6	1323129	OpenSea
cg24022879	1.1044	5.25754e-05	0.0467561	chr7	90868585	OpenSea
cg15260925	1.10179	2.2419e-05	0.0385709	chr3	71436970	OpenSea	5'UTR	NM_001244816	FOXP1	27086	ENSG00000114861
cg15260925	1.10179	2.2419e-05	0.0385709	chr3	71436970	OpenSea	5'UTR	NM_001244808	FOXP1	27086	ENSG00000114861
cg15260925	1.10179	2.2419e-05	0.0385709	chr3	71436970	OpenSea	5'UTR	NM_032682	FOXP1	27086	ENSG00000114861
cg15260925	1.10179	2.2419e-05	0.0385709	chr3	71436970	OpenSea	5'UTR	NM_001244810	FOXP1	27086	ENSG00000114861
cg15260925	1.10179	2.2419e-05	0.0385709	chr3	71436970	OpenSea	5'UTR	NM_001012505	FOXP1	27086	ENSG00000114861
cg22350027	1.09913	7.20037e-05	0.0512772	chr3	17036922	OpenSea	Body	NM_001144382	PLCL2	23228	ENSG00000154822
cg22350027	1.09913	7.20037e-05	0.0512772	chr3	17036922	OpenSea	Body	NM_001144382	PLCL2	23228	ENSG00000284017
cg22350027	1.09913	7.20037e-05	0.0512772	chr3	17036922	OpenSea	5'UTR	NM_015184	PLCL2	23228	ENSG00000154822
cg22350027	1.09913	7.20037e-05	0.0512772	chr3	17036922	OpenSea	5'UTR	NM_015184	PLCL2	23228	ENSG00000284017
cg17722747	1.09197	8.64964e-05	0.0517394	chr20	58665675	S_Shelf
cg14804880	1.08624	9.68789e-05	0.0521905	chr14	77193902	OpenSea
cg01859392	1.08103	6.39971e-05	0.0499283	chr9	16625556	OpenSea	Body	NM_017637	BNC2	54796	ENSG00000173068
cg09958483	1.07892	8.90289e-05	0.0517394	chr11	64527240	OpenSea	1stExon	NM_001164716	PYGM	5837	ENSG00000068976
cg09958483	1.07892	8.90289e-05	0.0517394	chr11	64527240	OpenSea	1stExon	NM_005609	PYGM	5837	ENSG00000068976
cg21342235	1.07483	9.11395e-05	0.0517394	chr3	142882868	OpenSea
cg20414957	1.07457	4.66013e-05	0.0456278	chr20	19869589	OpenSea	TSS1500	NM_018993	RIN2	54453	ENSG00000132669
cg20414957	1.07457	4.66013e-05	0.0456278	chr20	19869589	OpenSea	Body	NM_001242581	RIN2	54453	ENSG00000132669
cg17996991	1.0711	7.22608e-06	0.0285213	chr11	86651974	OpenSea
cg15819914	1.07086	7.58165e-05	0.0514828	chr1	155474162	OpenSea	Body	NM_018489	ASH1L	55870	ENSG00000116539
cg25173570	1.06397	2.79667e-05	0.0411722	chr2	72426319	OpenSea	Body	NM_015189	EXOC6B	23233	ENSG00000144036
cg16132546	1.05782	8.78443e-05	0.0517394	chr7	30560856	OpenSea
cg24329798	1.04835	5.83152e-05	0.0485587	chr22	27592445	OpenSea
cg10797319	1.04328	7.33227e-05	0.0514369	chr20	10649365	N_Shelf	Body	NM_000214	JAG1	182	ENSG00000101384
cg20242070	1.042	5.44978e-05	0.0475441	chr6	44510570	OpenSea
cg15291136	1.03978	8.50118e-05	0.0517087	chr5	171269509	OpenSea
cg13279457	1.03055	4.03462e-05	0.0446145	chr15	50337323	OpenSea	Body	NR_073598	ATP8B4	79895	ENSG00000104043
cg13279457	1.03055	4.03462e-05	0.0446145	chr15	50337323	OpenSea	Body	NR_073597	ATP8B4	79895	ENSG00000104043
cg13279457	1.03055	4.03462e-05	0.0446145	chr15	50337323	OpenSea	Body	NR_073596	ATP8B4	79895	ENSG00000104043
cg13279457	1.03055	4.03462e-05	0.0446145	chr15	50337323	OpenSea	Body	NM_024837	ATP8B4	79895	ENSG00000104043
cg14026876	1.02862	7.40293e-05	0.0514369	chr22	27520789	OpenSea
cg25772723	1.02842	8.19858e-05	0.0514828	chr3	128211126	Island	5'UTR	NM_032638	GATA2	2624	ENSG00000179348
cg16535796	1.02658	2.16193e-05	0.0385207	chr7	95472617	OpenSea	Body	NM_001278421	DYNC1I1	1780	ENSG00000158560
cg16535796	1.02658	2.16193e-05	0.0385207	chr7	95472617	OpenSea	Body	NM_001135557	DYNC1I1	1780	ENSG00000158560
cg16535796	1.02658	2.16193e-05	0.0385207	chr7	95472617	OpenSea	Body	NM_001135556	DYNC1I1	1780	ENSG00000158560
cg16535796	1.02658	2.16193e-05	0.0385207	chr7	95472617	OpenSea	Body	NM_004411	DYNC1I1	1780	ENSG00000158560
cg16535796	1.02658	2.16193e-05	0.0385207	chr7	95472617	OpenSea	Body	NM_001278422	DYNC1I1	1780	ENSG00000158560
cg27030854	1.02247	8.4445e-05	0.0516209	chr12	78514882	OpenSea	Body	NM_014903	NAV3	89795	ENSG00000067798
cg27030854	1.02247	8.4445e-05	0.0516209	chr12	78514882	OpenSea	Body	NM_001024383	NAV3	89795	ENSG00000067798
cg15075076	1.0217	7.5676e-05	0.0514828	chr19	43698545	OpenSea	Body	NM_002780	PSG4	5672	ENSG00000243137
cg15075076	1.0217	7.5676e-05	0.0514828	chr19	43698545	OpenSea	Body	NM_001276495	PSG4	5672	ENSG00000243137
cg15075076	1.0217	7.5676e-05	0.0514828	chr19	43698545	OpenSea	Body	NM_213633	PSG4	5672	ENSG00000243137
cg25885042	1.01662	4.97504e-05	0.0459825	chr2	59477248	OpenSea
cg24829888	1.01488	7.35533e-05	0.0514369	chr2	144239019	OpenSea	Body	NM_018460	ARHGAP15	55843	ENSG00000075884
cg15734839	1.01398	5.5551e-05	0.0478006	chr5	38469117	OpenSea
cg15083521	1.01306	4.48028e-05	0.045587	chr2	9679860	OpenSea	Body	NM_003183	ADAM17	6868	ENSG00000151694
cg20534662	1.01018	8.96891e-05	0.0517394	chr5	149158530	OpenSea	Body	NM_133263	PPARGC1B	133522	ENSG00000155846
cg01613249	1.00766	6.83945e-05	0.0504796	chr2	54727293	OpenSea	5'UTR	NM_003128	SPTBN1	6711	ENSG00000115306
cg05636467	1.0059	7.38171e-05	0.0514369	chr10	131669406	S_Shelf	Body	NM_001005463	EBF3	253738	ENSG00000108001
cg02929340	1.00589	5.52303e-05	0.0476874	chr18	3411754	OpenSea	TSS1500	NM_001278686	TGIF1	7050	ENSG00000177426
cg02929340	1.00589	5.52303e-05	0.0476874	chr18	3411754	OpenSea	TSS200	NM_174886	TGIF1	7050	ENSG00000177426
cg15597480	1.00523	9.82432e-05	0.0521905	chr1	110036205	N_Shore	TSS1500	NM_001134403	CYB561D1	284613	ENSG00000174151
cg15597480	1.00523	9.82432e-05	0.0521905	chr1	110036205	N_Shore	TSS1500	NM_182580	CYB561D1	284613	ENSG00000174151
cg15597480	1.00523	9.82432e-05	0.0521905	chr1	110036205	N_Shore	TSS1500	NM_001134402	CYB561D1	284613	ENSG00000174151
cg15597480	1.00523	9.82432e-05	0.0521905	chr1	110036205	N_Shore	TSS1500	NM_001134400	CYB561D1	284613	ENSG00000174151
cg15597480	1.00523	9.82432e-05	0.0521905	chr1	110036205	N_Shore	TSS1500	NM_001134404	CYB561D1	284613	ENSG00000174151
cg06059810	1.00241	6.42787e-05	0.0499283	chr4	71587722	OpenSea	1stExon	NM_001037442	RUFY3	22902	ENSG00000018189
cg06059810	1.00241	6.42787e-05	0.0499283	chr4	71587722	OpenSea	Body	NM_001130709	RUFY3	22902	ENSG00000018189
cg06059810	1.00241	6.42787e-05	0.0499283	chr4	71587722	OpenSea	5'UTR	NM_014961	RUFY3	22902	ENSG00000018189
cg06059810	1.00241	6.42787e-05	0.0499283	chr4	71587722	OpenSea	1stExon	NM_014961	RUFY3	22902	ENSG00000018189
cg06059810	1.00241	6.42787e-05	0.0499283	chr4	71587722	OpenSea	5'UTR	NM_001037442	RUFY3	22902	ENSG00000018189
cg07387931	1.00116	9.89102e-05	0.0521905	chr3	140785160	Island	Body	NM_080862	SPSB4	92369	ENSG00000175093
cg19473894	0.997411	8.98131e-06	0.0305952	chr2	27849938	OpenSea	Body	NM_024584	CCDC121	79635	ENSG00000176714
cg19473894	0.997411	8.98131e-06	0.0305952	chr2	27849938	OpenSea	Body	NM_001142683	CCDC121	79635	ENSG00000176714
cg00382999	0.996794	4.57627e-05	0.045587	chr3	136649333	OpenSea	Body	NM_006153	NCK1	4690	ENSG00000158092
cg00283535	0.996317	1.78338e-05	0.0367043	chr8	124749564	OpenSea	1stExon	NM_001003954	ANXA13	312	ENSG00000104537
cg00283535	0.996317	1.78338e-05	0.0367043	chr8	124749564	OpenSea	1stExon	NM_004306	ANXA13	312	ENSG00000104537
cg11858843	0.995656	5.34504e-05	0.0470501	chr22	30181185	OpenSea
cg22243733	0.986683	7.01563e-05	0.0510473	chr11	7506434	OpenSea	TSS200	NM_198474	OLFML1	283298	ENSG00000183801
cg01290153	0.985024	1.04329e-05	0.0323778	chr19	55987415	N_Shore	TSS1500	NM_033113	ZNF628	89887	ENSG00000197483
cg24909548	0.972981	4.70931e-05	0.0457729	chr19	36736272	Island
cg21510150	0.970276	8.12754e-05	0.0514828	chr3	11137697	OpenSea
cg23109299	0.965615	5.47586e-05	0.0475441	chr18	57152208	OpenSea	Body	NM_133459	CCBE1	147372	ENSG00000183287
cg07163687	0.96412	6.34282e-05	0.0499283	chr9	129767752	OpenSea	Body	NM_001190730	RALGPS1	9649	ENSG00000136828
cg07163687	0.96412	6.34282e-05	0.0499283	chr9	129767752	OpenSea	Body	NM_001190729	RALGPS1	9649	ENSG00000136828
cg07163687	0.96412	6.34282e-05	0.0499283	chr9	129767752	OpenSea	Body	NM_014636	RALGPS1	9649	ENSG00000136828
cg07163687	0.96412	6.34282e-05	0.0499283	chr9	129767752	OpenSea	Body	NM_001190728	RALGPS1	9649	ENSG00000136828
cg07373432	0.958934	9.82947e-05	0.0521905	chr12	49351865	S_Shore	TSS1500	NM_001659	ARF3	377	ENSG00000134287
cg19550133	0.955261	8.36891e-05	0.0516209	chr1	32683120	OpenSea	Body	NM_019118	TMEM234	56063	ENSG00000160055
cg12919527	0.954832	9.99604e-05	0.0521905	chr1	47060743	OpenSea	5'UTR	NM_001135553	MKNK1	8569	ENSG00000079277
cg12919527	0.954832	9.99604e-05	0.0521905	chr1	47060743	OpenSea	5'UTR	NM_198973	MKNK1	8569	ENSG00000079277
cg12919527	0.954832	9.99604e-05	0.0521905	chr1	47060743	OpenSea	5'UTR	NM_003684	MKNK1	8569	ENSG00000079277
cg12919527	0.954832	9.99604e-05	0.0521905	chr1	47060743	OpenSea	Body	NR_024176	MKNK1	8569	ENSG00000079277
cg12919527	0.954832	9.99604e-05	0.0521905	chr1	47060743	OpenSea	Body	NR_024174	MKNK1	8569	ENSG00000079277
cg13022534	0.954063	7.97723e-06	0.029361	chr5	171831028	OpenSea	Body	NM_001017995	SH3PXD2B	285590	ENSG00000174705
cg11166703	0.948286	9.52953e-05	0.0521905	chr3	58048877	OpenSea	Body	NM_001164319	FLNB	2317	ENSG00000136068
cg11166703	0.948286	9.52953e-05	0.0521905	chr3	58048877	OpenSea	Body	NM_001164318	FLNB	2317	ENSG00000136068
cg11166703	0.948286	9.52953e-05	0.0521905	chr3	58048877	OpenSea	Body	NM_001457	FLNB	2317	ENSG00000136068
cg11166703	0.948286	9.52953e-05	0.0521905	chr3	58048877	OpenSea	Body	NM_001164317	FLNB	2317	ENSG00000136068
cg26461009	0.933784	8.04361e-05	0.0514828	chr7	614047	S_Shore	Body	NM_001164759	PRKAR1B	5575	ENSG00000188191
cg26461009	0.933784	8.04361e-05	0.0514828	chr7	614047	S_Shore	Body	NM_001164762	PRKAR1B	5575	ENSG00000188191
cg26461009	0.933784	8.04361e-05	0.0514828	chr7	614047	S_Shore	Body	NM_001164758	PRKAR1B	5575	ENSG00000188191
cg26461009	0.933784	8.04361e-05	0.0514828	chr7	614047	S_Shore	Body	NM_001164760	PRKAR1B	5575	ENSG00000188191
cg26461009	0.933784	8.04361e-05	0.0514828	chr7	614047	S_Shore	Body	NM_001164761	PRKAR1B	5575	ENSG00000188191
cg26461009	0.933784	8.04361e-05	0.0514828	chr7	614047	S_Shore	Body	NM_002735	PRKAR1B	5575	ENSG00000188191
cg07146981	0.929351	3.76146e-05	0.0438988	chr12	67788759	OpenSea
cg24405470	0.91754	2.79751e-05	0.0411722	chr2	75767666	OpenSea	5'UTR	NM_032181	FAM176A	84141	ENSG00000115363
cg24405470	0.91754	2.79751e-05	0.0411722	chr2	75767666	OpenSea	5'UTR	NM_001135032	FAM176A	84141	ENSG00000115363
cg22799141	0.911681	9.14241e-05	0.0517394	chr12	114885621	N_Shore
cg05572157	0.907923	6.61921e-05	0.0499283	chr1	1297784	OpenSea	TSS1500	NM_001282583	MXRA8	54587	ENSG00000162576
cg05572157	0.907923	6.61921e-05	0.0499283	chr1	1297784	OpenSea	5'UTR	NM_001282582	MXRA8	54587	ENSG00000162576
cg07167778	0.9063	7.90919e-05	0.0514828	chr7	2024828	N_Shelf	Body	NM_003550	MAD1L1	8379	ENSG00000002822
cg07167778	0.9063	7.90919e-05	0.0514828	chr7	2024828	N_Shelf	Body	NM_001013837	MAD1L1	8379	ENSG00000002822
cg07167778	0.9063	7.90919e-05	0.0514828	chr7	2024828	N_Shelf	Body	NM_001013836	MAD1L1	8379	ENSG00000002822
cg27284718	0.904805	6.98359e-05	0.0509155	chr17	726892	OpenSea	Body	NM_001205319	NXN	64359	ENSG00000167693
cg27284718	0.904805	6.98359e-05	0.0509155	chr17	726892	OpenSea	Body	NM_001205319	NXN	64359	ENSG00000281300
cg27284718	0.904805	6.98359e-05	0.0509155	chr17	726892	OpenSea	Body	NM_001205319	NXN	64359	ENSG00000280563
cg27284718	0.904805	6.98359e-05	0.0509155	chr17	726892	OpenSea	Body	NM_022463	NXN	64359	ENSG00000167693
cg27284718	0.904805	6.98359e-05	0.0509155	chr17	726892	OpenSea	Body	NM_022463	NXN	64359	ENSG00000281300
cg27284718	0.904805	6.98359e-05	0.0509155	chr17	726892	OpenSea	Body	NM_022463	NXN	64359	ENSG00000280563
cg02101547	0.899899	7.71763e-05	0.0514828	chr9	96409537	OpenSea	Body	NM_005392	PHF2	5253	ENSG00000197724
cg12807206	0.894497	1.15326e-05	0.0326	chr2	157324457	OpenSea	5'UTR	NM_000408	GPD2	2820	ENSG00000115159
cg12807206	0.894497	1.15326e-05	0.0326	chr2	157324457	OpenSea	5'UTR	NM_001083112	GPD2	2820	ENSG00000115159
cg19370689	0.89411	3.84103e-05	0.0438988	chr7	102558323	OpenSea	5'UTR	NM_005824	LRRC17	10234	ENSG00000128606
cg19370689	0.89411	3.84103e-05	0.0438988	chr7	102558323	OpenSea	Body	NM_145032	FBXL13	222235	ENSG00000161040
cg19370689	0.89411	3.84103e-05	0.0438988	chr7	102558323	OpenSea	5'UTR	NM_001031692	LRRC17	10234	ENSG00000128606
cg19370689	0.89411	3.84103e-05	0.0438988	chr7	102558323	OpenSea	Body	NM_001111038	FBXL13	222235	ENSG00000161040
cg05006277	0.88892	8.03207e-05	0.0514828	chr9	14243730	OpenSea	Body	NM_001190737	NFIB	4781	ENSG00000147862
cg05006277	0.88892	8.03207e-05	0.0514828	chr9	14243730	OpenSea	Body	NM_005596	NFIB	4781	ENSG00000147862
cg05006277	0.88892	8.03207e-05	0.0514828	chr9	14243730	OpenSea	Body	NM_001190738	NFIB	4781	ENSG00000147862
cg15025227	0.886966	3.74514e-06	0.0245587	chr15	52430789	OpenSea	Body	NM_006578	GNB5	10681	ENSG00000069966
cg15025227	0.886966	3.74514e-06	0.0245587	chr15	52430789	OpenSea	Body	NM_016194	GNB5	10681	ENSG00000069966
cg25419317	0.886232	2.82545e-05	0.0411722	chr2	161190202	OpenSea	Body	NM_002897	RBMS1	5937	ENSG00000153250
cg25419317	0.886232	2.82545e-05	0.0411722	chr2	161190202	OpenSea	Body	NM_016836	RBMS1	5937	ENSG00000153250
cg03595881	0.886104	1.87402e-05	0.0367631	chr8	25895105	N_Shelf	Body	NM_022659	EBF2	64641	ENSG00000221818
cg11712950	0.885459	3.87358e-05	0.0438988	chr12	94798866	OpenSea	Body	NM_016122	CEP83	51134	ENSG00000173588
cg11712950	0.885459	3.87358e-05	0.0438988	chr12	94798866	OpenSea	Body	NM_001042399	CEP83	51134	ENSG00000173588
cg08420923	0.884532	5.90436e-05	0.0489675	chr16	89436447	N_Shelf	5'UTR	NM_013275	ANKRD11	29123	ENSG00000167522
cg05080409	0.87817	6.40807e-05	0.0499283	chr22	37729350	N_Shore
cg19784903	0.877731	5.71473e-05	0.0484471	chr17	45786737	Island	Body	NM_014726	TBKBP1	9755	ENSG00000198933
cg10299941	0.877054	9.95579e-05	0.0521905	chr8	145009137	Island	Body	NM_201378	PLEC1	5339	ENSG00000178209
cg10299941	0.877054	9.95579e-05	0.0521905	chr8	145009137	Island	Body	NM_201384	PLEC1	5339	ENSG00000178209
cg10299941	0.877054	9.95579e-05	0.0521905	chr8	145009137	Island	Body	NM_201382	PLEC1	5339	ENSG00000178209
cg10299941	0.877054	9.95579e-05	0.0521905	chr8	145009137	Island	Body	NM_201381	PLEC1	5339	ENSG00000178209
cg10299941	0.877054	9.95579e-05	0.0521905	chr8	145009137	Island	Body	NM_000445	PLEC1	5339	ENSG00000178209
cg10299941	0.877054	9.95579e-05	0.0521905	chr8	145009137	Island	Body	NM_201380	PLEC1	5339	ENSG00000178209
cg10299941	0.877054	9.95579e-05	0.0521905	chr8	145009137	Island	Body	NM_201383	PLEC1	5339	ENSG00000178209
cg10299941	0.877054	9.95579e-05	0.0521905	chr8	145009137	Island	Body	NM_201379	PLEC1	5339	ENSG00000178209
cg10941356	0.874432	6.39835e-05	0.0499283	chr19	5282046	OpenSea	Body	NM_130853	PTPRS	5802	ENSG00000105426
cg10941356	0.874432	6.39835e-05	0.0499283	chr19	5282046	OpenSea	Body	NM_130855	PTPRS	5802	ENSG00000105426
cg10941356	0.874432	6.39835e-05	0.0499283	chr19	5282046	OpenSea	Body	NM_130854	PTPRS	5802	ENSG00000105426
cg10941356	0.874432	6.39835e-05	0.0499283	chr19	5282046	OpenSea	Body	NM_002850	PTPRS	5802	ENSG00000105426
cg03146706	0.856867	9.90881e-05	0.0521905	chr4	5794600	OpenSea	Body	NM_153717	EVC	2121	ENSG00000072840
cg03146706	0.856867	9.90881e-05	0.0521905	chr4	5794600	OpenSea	Body	NM_001306090	EVC	2121	ENSG00000072840
cg19181528	0.856805	9.35665e-06	0.0310396	chr20	59542589	Island
cg21514164	0.855888	1.08137e-05	0.0323778	chr2	43188940	OpenSea
cg26849467	0.849558	6.51993e-05	0.0499283	chr18	11176416	OpenSea
cg21427003	0.846955	9.11165e-05	0.0517394	chr22	30198241	OpenSea	Body	NM_001242906	ASCC2	84164	ENSG00000100325
cg21427003	0.846955	9.11165e-05	0.0517394	chr22	30198241	OpenSea	Body	NM_032204	ASCC2	84164	ENSG00000100325
cg02912281	0.839486	7.28895e-05	0.0514369	chr1	9436271	OpenSea
cg08768873	0.835304	7.42956e-05	0.0514369	chr16	12213533	S_Shelf	Body	NM_032167	SNX29	92017	ENSG00000048471
cg05499776	0.833805	3.52442e-05	0.0438988	chr22	36682279	OpenSea	Body	NM_002473	MYH9	4627	ENSG00000100345
cg20432681	0.820508	6.98742e-05	0.0509155	chr20	56648586	OpenSea
cg05909206	0.817683	6.8882e-05	0.0504796	chr14	96701169	OpenSea	5'UTR	NM_000623	BDKRB2	624	ENSG00000168398
cg10778971	0.80136	1.3732e-05	0.0340615	chr14	94577101	OpenSea	5'UTR	NM_005532	IFI27	3429	ENSG00000165949
cg10778971	0.80136	1.3732e-05	0.0340615	chr14	94577101	OpenSea	5'UTR	NM_005532	IFI27	3429	ENSG00000275214
cg10778971	0.80136	1.3732e-05	0.0340615	chr14	94577101	OpenSea	1stExon	NM_005532	IFI27	3429	ENSG00000165949
cg10778971	0.80136	1.3732e-05	0.0340615	chr14	94577101	OpenSea	1stExon	NM_005532	IFI27	3429	ENSG00000275214
cg10778971	0.80136	1.3732e-05	0.0340615	chr14	94577101	OpenSea	1stExon	NM_001130080	IFI27	3429	ENSG00000165949
cg10778971	0.80136	1.3732e-05	0.0340615	chr14	94577101	OpenSea	1stExon	NM_001130080	IFI27	3429	ENSG00000275214
cg10778971	0.80136	1.3732e-05	0.0340615	chr14	94577101	OpenSea	5'UTR	NM_001130080	IFI27	3429	ENSG00000165949
cg10778971	0.80136	1.3732e-05	0.0340615	chr14	94577101	OpenSea	5'UTR	NM_001130080	IFI27	3429	ENSG00000275214
cg02162897	0.797977	2.54675e-05	0.0395868	chr2	38300537	N_Shore	Body	NM_000104	CYP1B1	1545	ENSG00000138061
cg03847103	0.795603	8.11747e-05	0.0514828	chr14	50802253	OpenSea	Body	NM_004196	CDKL1	8814	ENSG00000100490
cg03847103	0.795603	8.11747e-05	0.0514828	chr14	50802253	OpenSea	Body	NM_001282236	CDKL1	8814	ENSG00000100490
cg26120971	0.792005	9.1856e-05	0.0518051	chr8	118676025	OpenSea
cg08239207	0.791197	7.9647e-05	0.0514828	chr20	37633414	OpenSea	Body	NR_033905	DHX35	60625	ENSG00000101452
cg08239207	0.791197	7.9647e-05	0.0514828	chr20	37633414	OpenSea	Body	NM_021931	DHX35	60625	ENSG00000101452
cg08239207	0.791197	7.9647e-05	0.0514828	chr20	37633414	OpenSea	Body	NM_001190809	DHX35	60625	ENSG00000101452
cg25949961	0.788792	7.96265e-05	0.0514828	chr17	79166676	S_Shore	Body	NM_014984	AZI1	22994	ENSG00000141577
cg25949961	0.788792	7.96265e-05	0.0514828	chr17	79166676	S_Shore	Body	NM_001009811	AZI1	22994	ENSG00000141577
cg22411165	0.788597	3.26977e-05	0.0438988	chr7	42251735	OpenSea	Body	NM_000168	GLI3	2737	ENSG00000106571
cg24245233	0.783839	7.72119e-05	0.0514828	chr3	132061165	OpenSea	Body	NM_001099	ACPP	55	ENSG00000014257
cg24245233	0.783839	7.72119e-05	0.0514828	chr3	132061165	OpenSea	Body	NM_001292037	ACPP	55	ENSG00000014257
cg24245233	0.783839	7.72119e-05	0.0514828	chr3	132061165	OpenSea	Body	NM_001134194	ACPP	55	ENSG00000014257
cg02564259	0.781156	2.14917e-05	0.0384291	chr16	67978429	OpenSea	3'UTR	NM_001145962	SLC12A4	6560	ENSG00000124067
cg02564259	0.781156	2.14917e-05	0.0384291	chr16	67978429	OpenSea	3'UTR	NM_005072	SLC12A4	6560	ENSG00000124067
cg02564259	0.781156	2.14917e-05	0.0384291	chr16	67978429	OpenSea	3'UTR	NM_001145963	SLC12A4	6560	ENSG00000124067
cg02564259	0.781156	2.14917e-05	0.0384291	chr16	67978429	OpenSea	3'UTR	NM_001145961	SLC12A4	6560	ENSG00000124067
cg02564259	0.781156	2.14917e-05	0.0384291	chr16	67978429	OpenSea	3'UTR	NM_001145964	SLC12A4	6560	ENSG00000124067
cg02564259	0.781156	2.14917e-05	0.0384291	chr16	67978429	OpenSea	TSS1500	NM_000229	LCAT	3931	ENSG00000213398
cg12624789	0.779541	5.24613e-05	0.0467371	chr14	104016639	OpenSea
cg15360478	0.774049	7.86316e-05	0.0514828	chr2	43094440	OpenSea
cg10328550	0.773043	2.43762e-05	0.0395868	chr7	69558145	OpenSea	Body	NM_001127232	AUTS2	26053	ENSG00000158321
cg10328550	0.773043	2.43762e-05	0.0395868	chr7	69558145	OpenSea	Body	NM_015570	AUTS2	26053	ENSG00000158321
cg10328550	0.773043	2.43762e-05	0.0395868	chr7	69558145	OpenSea	Body	NM_001127231	AUTS2	26053	ENSG00000158321
cg07791490	0.769733	9.75528e-05	0.0521905	chr8	99949391	N_Shelf
cg09322973	0.765336	4.36158e-06	0.024583	chr12	8333010	Island	Body	NR_026788	FAM66C	440078	ENSG00000226711
cg05038241	0.760672	9.09091e-06	0.0305952	chr10	121090736	OpenSea	Body	NM_005308	GRK5	2869	ENSG00000198873
cg15179921	0.757732	6.4982e-05	0.0499283	chr6	32045525	N_Shore	Body	NM_019105	TNXB	7148	ENSG00000168477
cg15179921	0.757732	6.4982e-05	0.0499283	chr6	32045525	N_Shore	Body	NM_019105	TNXB	7148	ENSG00000229341
cg15179921	0.757732	6.4982e-05	0.0499283	chr6	32045525	N_Shore	Body	NM_019105	TNXB	7148	ENSG00000229353
cg15179921	0.757732	6.4982e-05	0.0499283	chr6	32045525	N_Shore	Body	NM_019105	TNXB	7148	ENSG00000236221
cg15179921	0.757732	6.4982e-05	0.0499283	chr6	32045525	N_Shore	Body	NM_019105	TNXB	7148	ENSG00000231608
cg15179921	0.757732	6.4982e-05	0.0499283	chr6	32045525	N_Shore	Body	NM_019105	TNXB	7148	ENSG00000206258
cg15179921	0.757732	6.4982e-05	0.0499283	chr6	32045525	N_Shore	Body	NM_019105	TNXB	7148	ENSG00000236236
cg15179921	0.757732	6.4982e-05	0.0499283	chr6	32045525	N_Shore	Body	NM_019105	TNXB	7148	ENSG00000233323
cg02268748	0.755192	4.43601e-05	0.045587	chr11	102139425	Island
cg20532908	0.754672	8.75493e-05	0.0517394	chr18	22720427	OpenSea	Body	NM_001308225	ZNF521	25925	ENSG00000198795
cg20532908	0.754672	8.75493e-05	0.0517394	chr18	22720427	OpenSea	Body	NM_015461	ZNF521	25925	ENSG00000198795
cg06383189	0.75439	6.53444e-05	0.0499283	chr3	13607970	N_Shelf	5'UTR	NM_001004019	FBLN2	2199	ENSG00000163520
cg06383189	0.75439	6.53444e-05	0.0499283	chr3	13607970	N_Shelf	5'UTR	NM_001998	FBLN2	2199	ENSG00000163520
cg05158074	0.751376	1.27626e-05	0.033518	chr12	111284585	OpenSea	TSS1500	NM_152591	CCDC63	160762	ENSG00000173093
cg07991704	0.743715	4.96416e-05	0.0459825	chr4	72096973	OpenSea	5'UTR	NM_001098484	SLC4A4	8671	ENSG00000080493
cg07991704	0.743715	4.96416e-05	0.0459825	chr4	72096973	OpenSea	5'UTR	NM_001134742	SLC4A4	8671	ENSG00000080493
cg02111433	0.742662	5.86638e-05	0.0487327	chr16	53947953	OpenSea	Body	NM_001080432	FTO	79068	ENSG00000140718
cg23699648	0.728739	8.42859e-05	0.0516209	chr6	121756560	OpenSea	TSS200	NM_000165	GJA1	2697	ENSG00000152661
cg01284182	0.727856	5.497e-05	0.0475441	chr15	39823154	OpenSea
cg18148488	0.725022	3.93088e-05	0.044119	chr2	88366775	OpenSea	TSS1500	NM_198274	SMYD1	150572	ENSG00000115593
cg11913652	0.721661	2.27692e-05	0.0385709	chr1	110282953	Island	5'UTR	NM_000849	GSTM3	2947	ENSG00000134202
cg11913652	0.721661	2.27692e-05	0.0385709	chr1	110282953	Island	Body	NR_024537	GSTM3	2947	ENSG00000134202
cg11711816	0.721456	5.81685e-05	0.0485587	chr10	131764932	Island
cg01301789	0.714104	8.32317e-05	0.0516209	chr20	58358439	OpenSea	Body	NM_001199505	PHACTR3	116154	ENSG00000087495
cg01301789	0.714104	8.32317e-05	0.0516209	chr20	58358439	OpenSea	Body	NM_080672	PHACTR3	116154	ENSG00000087495
cg01301789	0.714104	8.32317e-05	0.0516209	chr20	58358439	OpenSea	Body	NM_001199506	PHACTR3	116154	ENSG00000087495
cg01301789	0.714104	8.32317e-05	0.0516209	chr20	58358439	OpenSea	Body	NM_183246	PHACTR3	116154	ENSG00000087495
cg01301789	0.714104	8.32317e-05	0.0516209	chr20	58358439	OpenSea	Body	NM_183244	PHACTR3	116154	ENSG00000087495
cg01301789	0.714104	8.32317e-05	0.0516209	chr20	58358439	OpenSea	Body	NM_001281507	PHACTR3	116154	ENSG00000087495
cg18181145	0.712365	8.03663e-05	0.0514828	chr7	151134053	N_Shelf	Body	NM_144727	CRYGN	155051	ENSG00000127377
cg18181145	0.712365	8.03663e-05	0.0514828	chr7	151134053	N_Shelf	3'UTR	NM_001308292	CRYGN	155051	ENSG00000127377
cg18181145	0.712365	8.03663e-05	0.0514828	chr7	151134053	N_Shelf	Body	NR_131779	CRYGN	155051	ENSG00000127377
cg22338356	0.707561	9.72766e-05	0.0521905	chr8	48739161	OpenSea	Body	NM_001081640	PRKDC	5591	ENSG00000253729
cg22338356	0.707561	9.72766e-05	0.0521905	chr8	48739161	OpenSea	Body	NM_006904	PRKDC	5591	ENSG00000253729
cg19056951	0.706322	7.13059e-05	0.0511371	chr7	140064774	OpenSea	Body	NM_032295	SLC37A3	84255	ENSG00000157800
cg19056951	0.706322	7.13059e-05	0.0511371	chr7	140064774	OpenSea	Body	NM_207113	SLC37A3	84255	ENSG00000157800
cg19056951	0.706322	7.13059e-05	0.0511371	chr7	140064774	OpenSea	Body	NM_001287498	SLC37A3	84255	ENSG00000157800
cg02887497	0.705447	5.80269e-05	0.0485587	chr16	22206627	S_Shelf
cg05306950	0.70282	9.79063e-05	0.0521905	chr19	40854151	N_Shore	TSS200	NM_012268	PLD3	23646	ENSG00000105223
cg05306950	0.70282	9.79063e-05	0.0521905	chr19	40854151	N_Shore	TSS200	NM_001031696	PLD3	23646	ENSG00000105223
cg05306950	0.70282	9.79063e-05	0.0521905	chr19	40854151	N_Shore	5'UTR	NM_178830	C19orf47	126526	ENSG00000160392
cg11845002	0.700781	4.30771e-05	0.045442	chr3	107513746	OpenSea	Body	NM_001142568	BBX	56987	ENSG00000114439
cg11845002	0.700781	4.30771e-05	0.045442	chr3	107513746	OpenSea	Body	NM_020235	BBX	56987	ENSG00000114439
cg11845002	0.700781	4.30771e-05	0.045442	chr3	107513746	OpenSea	Body	NM_001276286	BBX	56987	ENSG00000114439
cg08514932	0.698871	6.89758e-05	0.0504796	chr21	36217108	OpenSea	Body	NM_001122607	RUNX1	861	ENSG00000159216
cg08514932	0.698871	6.89758e-05	0.0504796	chr21	36217108	OpenSea	Body	NM_001001890	RUNX1	861	ENSG00000159216
cg08514932	0.698871	6.89758e-05	0.0504796	chr21	36217108	OpenSea	Body	NM_001754	RUNX1	861	ENSG00000159216
cg00846297	0.696894	9.91241e-05	0.0521905	chr5	171863790	OpenSea	Body	NM_001308175	SH3PXD2B	285590	ENSG00000174705
cg00846297	0.696894	9.91241e-05	0.0521905	chr5	171863790	OpenSea	Body	NM_001017995	SH3PXD2B	285590	ENSG00000174705
cg24207068	0.688549	3.3417e-05	0.0438988	chr17	78865662	S_Shore	Body	NM_001163034	RPTOR	57521	ENSG00000141564
cg24207068	0.688549	3.3417e-05	0.0438988	chr17	78865662	S_Shore	Body	NM_020761	RPTOR	57521	ENSG00000141564
cg09726625	0.678693	7.90324e-06	0.0293025	chr6	121755889	OpenSea	TSS1500	NM_000165	GJA1	2697	ENSG00000152661
cg11300809	0.668252	2.7485e-05	0.0411722	chr2	223288637	N_Shore	TSS1500	NM_152386	SGPP2	130367	ENSG00000163082
cg22539670	0.663581	5.75437e-05	0.0485587	chr3	32000667	OpenSea	Body	NM_017784	OSBPL10	114884	ENSG00000144645
cg22733863	0.65614	7.05253e-05	0.0511371	chr18	7596354	OpenSea	Body	NM_002845	PTPRM	5797	ENSG00000173482
cg22733863	0.65614	7.05253e-05	0.0511371	chr18	7596354	OpenSea	Body	NM_001105244	PTPRM	5797	ENSG00000173482
cg14278950	0.648236	2.55149e-05	0.0395868	chr20	48201456	OpenSea
cg20408276	0.647139	4.60172e-05	0.045587	chr2	38300586	N_Shore	Body	NM_000104	CYP1B1	1545	ENSG00000138061
cg25658724	0.644024	7.76183e-05	0.0514828	chr6	155702287	OpenSea
cg22123464	0.631577	8.04122e-05	0.0514828	chr19	47974901	OpenSea	5'UTR	NM_015063	SLC8A2	6543	ENSG00000118160
cg04036011	0.6212	4.65975e-05	0.0456278	chr1	43291088	OpenSea	TSS200	NM_018538	ERMAP	114625	ENSG00000164010
cg04036011	0.6212	4.65975e-05	0.0456278	chr1	43291088	OpenSea	5'UTR	NM_001017922	ERMAP	114625	ENSG00000164010
cg02988288	0.621131	1.17531e-05	0.0327425	chr1	145440445	OpenSea	Body	NM_006472	TXNIP	10628	ENSG00000265972
cg02988288	0.621131	1.17531e-05	0.0327425	chr1	145440445	OpenSea	Body	NM_001278267	NBPF20	100288142	ENSG00000162825
cg02988288	0.621131	1.17531e-05	0.0327425	chr1	145440445	OpenSea	Body	NM_001039703	NBPF10	100132406	ENSG00000271425
cg02988288	0.621131	1.17531e-05	0.0327425	chr1	145440445	OpenSea	Body	NM_001302371	NBPF10	100132406	ENSG00000271425
cg08154437	0.619674	8.87433e-06	0.0305952	chr19	17008650	Island	Body	NM_015692	CPAMD8	27151	ENSG00000160111
cg19455144	0.613579	7.41147e-05	0.0514369	chr2	238179180	OpenSea
cg14548158	0.591452	7.0268e-05	0.0510548	chr21	40359434	OpenSea
cg25233685	0.587905	2.14682e-05	0.0384291	chr19	41115759	Island	Body	NM_001042545	LTBP4	8425	ENSG00000090006
cg25233685	0.587905	2.14682e-05	0.0384291	chr19	41115759	Island	Body	NM_001042544	LTBP4	8425	ENSG00000090006
cg25233685	0.587905	2.14682e-05	0.0384291	chr19	41115759	Island	Body	NM_003573	LTBP4	8425	ENSG00000090006
cg16440069	0.581938	7.43642e-05	0.0514369	chr11	47546111	OpenSea	5'UTR	NM_006560	CELF1	10658	ENSG00000149187
cg16440069	0.581938	7.43642e-05	0.0514369	chr11	47546111	OpenSea	TSS1500	NM_001172639	CELF1	10658	ENSG00000149187
cg25300824	0.575356	9.04502e-05	0.0517394	chr8	33482345	OpenSea
cg11274148	0.571132	4.94204e-05	0.0459825	chr17	78876656	N_Shelf	Body	NM_001163034	RPTOR	57521	ENSG00000141564
cg11274148	0.571132	4.94204e-05	0.0459825	chr17	78876656	N_Shelf	Body	NM_020761	RPTOR	57521	ENSG00000141564
cg02837825	0.568529	4.95607e-05	0.0459825	chr6	9607150	OpenSea
cg04658243	0.558546	2.42335e-06	0.0238167	chr17	78865755	S_Shore	Body	NM_020761	RPTOR	57521	ENSG00000141564
cg26279216	0.550264	1.90023e-05	0.0367631	chr10	131506261	OpenSea	Body	NM_002412	MGMT	4255	ENSG00000170430
cg02474625	0.548957	1.85468e-05	0.0367631	chr11	103197069	OpenSea	Body	NM_001377	DYNC2H1	79659	ENSG00000187240
cg02474625	0.548957	1.85468e-05	0.0367631	chr11	103197069	OpenSea	Body	NM_001080463	DYNC2H1	79659	ENSG00000187240
cg03339247	0.541475	8.59662e-05	0.0517394	chr16	73059888	OpenSea	5'UTR	NM_006885	ZFHX3	463	ENSG00000140836
cg03339247	0.541475	8.59662e-05	0.0517394	chr16	73059888	OpenSea	5'UTR	NM_001164766	ZFHX3	463	ENSG00000140836
cg03281788	0.536698	8.93563e-05	0.0517394	chr5	89773899	S_Shelf	5'UTR	NM_006467	POLR3G	10622	ENSG00000113356
cg03265561	0.536179	1.2458e-05	0.0330624	chr14	103720063	OpenSea
cg26981809	0.535605	6.62849e-05	0.0499283	chr17	45786512	Island	Body	NM_014726	TBKBP1	9755	ENSG00000198933
cg06130683	0.52248	4.4742e-05	0.045587	chr12	124844761	OpenSea	Body	NM_006312	NCOR2	9612	ENSG00000196498
cg06130683	0.52248	4.4742e-05	0.045587	chr12	124844761	OpenSea	Body	NM_001077261	NCOR2	9612	ENSG00000196498
cg06130683	0.52248	4.4742e-05	0.045587	chr12	124844761	OpenSea	Body	NM_001206654	NCOR2	9612	ENSG00000196498
cg01103387	0.511437	3.16321e-05	0.0429925	chr2	38301143	N_Shore	Body	NM_000104	CYP1B1	1545	ENSG00000138061
cg24479733	0.511303	9.75866e-05	0.0521905	chr1	151763981	Island	TSS1500	NM_001083963	TDRKH	11022	ENSG00000182134
cg24479733	0.511303	9.75866e-05	0.0521905	chr1	151763981	Island	TSS1500	NM_006862	TDRKH	11022	ENSG00000182134
cg24479733	0.511303	9.75866e-05	0.0521905	chr1	151763981	Island	TSS1500	NM_001083965	TDRKH	11022	ENSG00000182134
cg24479733	0.511303	9.75866e-05	0.0521905	chr1	151763981	Island	TSS1500	NM_001083964	TDRKH	11022	ENSG00000182134
cg06969177	0.491293	2.54295e-05	0.0395868	chr17	80763047	N_Shore	Body	NM_005993	TBCD	6904	ENSG00000141556
cg06969177	0.491293	2.54295e-05	0.0395868	chr17	80763047	N_Shore	Body	NM_005993	TBCD	6904	ENSG00000278759
cg20447120	0.489458	4.51871e-05	0.045587	chr2	29336330	N_Shore	TSS1500	NR_109844	CLIP4	79745	ENSG00000115295
cg20447120	0.489458	4.51871e-05	0.045587	chr2	29336330	N_Shore	5'UTR	NM_001287528	CLIP4	79745	ENSG00000115295
cg00819310	0.489283	5.8332e-05	0.0485587	chr1	116193783	OpenSea	5'UTR	NM_138959	VANGL1	81839	ENSG00000173218
cg09079875	0.488586	5.33437e-05	0.0470501	chr1	112152664	OpenSea
cg08130060	0.483185	8.01652e-05	0.0514828	chr17	43525114	OpenSea	Body	NR_027782	PLEKHM1	9842	ENSG00000225190
cg08130060	0.483185	8.01652e-05	0.0514828	chr17	43525114	OpenSea	Body	NR_027782	PLEKHM1	9842	ENSG00000276358
cg08130060	0.483185	8.01652e-05	0.0514828	chr17	43525114	OpenSea	Body	NR_027782	PLEKHM1	9842	ENSG00000277111
cg08130060	0.483185	8.01652e-05	0.0514828	chr17	43525114	OpenSea	Body	NR_027774	PLEKHM1	9842	ENSG00000225190
cg08130060	0.483185	8.01652e-05	0.0514828	chr17	43525114	OpenSea	Body	NR_027774	PLEKHM1	9842	ENSG00000276358
cg08130060	0.483185	8.01652e-05	0.0514828	chr17	43525114	OpenSea	Body	NR_027774	PLEKHM1	9842	ENSG00000277111
cg08130060	0.483185	8.01652e-05	0.0514828	chr17	43525114	OpenSea	Body	NM_014798	PLEKHM1	9842	ENSG00000225190
cg08130060	0.483185	8.01652e-05	0.0514828	chr17	43525114	OpenSea	Body	NM_014798	PLEKHM1	9842	ENSG00000276358
cg08130060	0.483185	8.01652e-05	0.0514828	chr17	43525114	OpenSea	Body	NM_014798	PLEKHM1	9842	ENSG00000277111
cg18976667	0.476784	8.25799e-05	0.0516209	chr7	138754670	OpenSea	Body	NM_020119	ZC3HAV1	56829	ENSG00000105939
cg18976667	0.476784	8.25799e-05	0.0516209	chr7	138754670	OpenSea	Body	NM_024625	ZC3HAV1	56829	ENSG00000105939
cg26649377	0.474049	4.51568e-06	0.024583	chr11	104963481	OpenSea	3'UTR	NM_001007232	CARD17	440068	ENSG00000255221
cg24391989	0.472248	1.12897e-05	0.0324653	chr3	32010656	OpenSea	Body	NM_017784	OSBPL10	114884	ENSG00000144645
cg02283949	0.469243	4.16441e-06	0.0245587	chr6	143544445	OpenSea	Body	NM_016108	AIG1	51390	ENSG00000146416
cg27482872	0.464181	8.62717e-05	0.0517394	chr11	126304599	OpenSea	Body	NM_032531	KIRREL3	84623	ENSG00000149571
cg27482872	0.464181	8.62717e-05	0.0517394	chr11	126304599	OpenSea	Body	NM_001301097	KIRREL3	84623	ENSG00000149571
cg27482872	0.464181	8.62717e-05	0.0517394	chr11	126304599	OpenSea	Body	NM_001161707	KIRREL3	84623	ENSG00000149571
cg13377056	0.462756	8.14429e-05	0.0514828	chr1	145705805	OpenSea	Body	NM_007053	CD160	11126	ENSG00000117281
cg16069079	0.454936	2.96853e-06	0.0243866	chr15	41219238	Island
cg21158163	0.451964	3.55796e-06	0.0245587	chr20	59542578	Island
cg07321819	0.44957	9.78071e-05	0.0521905	chr8	32077461	OpenSea	Body	NM_013962	NRG1	3084	ENSG00000157168
cg19360886	0.446912	8.67273e-05	0.0517394	chr6	21593129	N_Shore	TSS1500	NM_003107	SOX4	6659	ENSG00000124766
cg20317148	0.446037	6.445e-05	0.0499283	chr17	39590677	OpenSea
cg23501051	0.440002	6.04477e-05	0.0495614	chr11	19736912	S_Shore	TSS1500	NR_015384	LOC100126784	100126784
cg23501051	0.440002	6.04477e-05	0.0495614	chr11	19736912	S_Shore	Body	NM_182964	NAV2	89797	ENSG00000166833
cg23501051	0.440002	6.04477e-05	0.0495614	chr11	19736912	S_Shore	Body	NM_001111018	NAV2	89797	ENSG00000166833
cg23501051	0.440002	6.04477e-05	0.0495614	chr11	19736912	S_Shore	Body	NM_145117	NAV2	89797	ENSG00000166833
cg04537362	0.433616	1.37763e-05	0.0340615	chr11	45070638	OpenSea
cg19712719	0.430162	3.35876e-05	0.0438988	chr12	132207665	OpenSea	Body	NM_001261411	SFSWAP	6433	ENSG00000061936
cg19712719	0.430162	3.35876e-05	0.0438988	chr12	132207665	OpenSea	Body	NM_004592	SFSWAP	6433	ENSG00000061936
cg09715009	0.423146	6.2218e-05	0.0499283	chr5	175241829	OpenSea	5'UTR	NM_006650	CPLX2	10814	ENSG00000145920
cg06009066	0.420882	7.68842e-05	0.0514828	chr11	57371977	OpenSea	Body	NM_000062	SERPING1	710	ENSG00000149131
cg06009066	0.420882	7.68842e-05	0.0514828	chr11	57371977	OpenSea	Body	NM_001032295	SERPING1	710	ENSG00000149131
cg11063495	0.420719	3.47063e-05	0.0438988	chr2	28718959	OpenSea	5'UTR	NM_001170585	PLB1	151056	ENSG00000163803
cg11063495	0.420719	3.47063e-05	0.0438988	chr2	28718959	OpenSea	1stExon	NM_001170585	PLB1	151056	ENSG00000163803
cg11063495	0.420719	3.47063e-05	0.0438988	chr2	28718959	OpenSea	5'UTR	NM_153021	PLB1	151056	ENSG00000163803
cg11063495	0.420719	3.47063e-05	0.0438988	chr2	28718959	OpenSea	1stExon	NM_153021	PLB1	151056	ENSG00000163803
cg01653532	0.408944	1.64174e-05	0.0357784	chr17	57444078	OpenSea	Body	NM_001005404	YPEL2	388403	ENSG00000175155
cg13186120	0.406567	2.13323e-05	0.0384291	chr12	40117933	OpenSea
cg19221620	0.394207	3.09119e-05	0.0424716	chr2	175208144	N_Shore
cg14161440	0.382592	1.57933e-05	0.0353728	chr3	64136807	OpenSea	Body	NM_198859	PRICKLE2	166336	ENSG00000163637
cg10111629	0.381621	1.21446e-05	0.0329401	chr1	113067124	OpenSea	3'UTR	NM_017744	ST7L	54879	ENSG00000007341
cg10111629	0.381621	1.21446e-05	0.0329401	chr1	113067124	OpenSea	3'UTR	NM_138728	ST7L	54879	ENSG00000007341
cg10111629	0.381621	1.21446e-05	0.0329401	chr1	113067124	OpenSea	3'UTR	NM_138727	ST7L	54879	ENSG00000007341
cg17865045	0.37306	8.52409e-05	0.0517394	chr7	99994933	OpenSea	Body	NM_178273	PILRA	29992	ENSG00000085514
cg17865045	0.37306	8.52409e-05	0.0517394	chr7	99994933	OpenSea	Body	NM_013439	PILRA	29992	ENSG00000085514
cg17865045	0.37306	8.52409e-05	0.0517394	chr7	99994933	OpenSea	Body	NM_178272	PILRA	29992	ENSG00000085514
cg16551732	0.368062	3.72992e-05	0.0438988	chr4	169799087	Island	Body	NM_016081	PALLD	23022	ENSG00000129116
cg16551732	0.368062	3.72992e-05	0.0438988	chr4	169799087	Island	Body	NM_001166110	PALLD	23022	ENSG00000129116
cg16551732	0.368062	3.72992e-05	0.0438988	chr4	169799087	Island	Body	NM_001166109	PALLD	23022	ENSG00000129116
cg16551732	0.368062	3.72992e-05	0.0438988	chr4	169799087	Island	Body	NM_001166108	PALLD	23022	ENSG00000129116
cg04552470	0.365267	5.9386e-05	0.0491706	chr1	20669792	Island	Body	NM_001039500	VWA5B1	127731	ENSG00000158816
cg14372191	0.354458	6.88023e-05	0.0504796	chr1	31467555	OpenSea	Body	NM_001020658	PUM1	9698	ENSG00000134644
cg14372191	0.354458	6.88023e-05	0.0504796	chr1	31467555	OpenSea	Body	NM_014676	PUM1	9698	ENSG00000134644
cg06563528	0.347046	3.69156e-05	0.0438988	chr7	56062794	OpenSea	Body	NM_001483	GBAS	2631	ENSG00000146729
cg06563528	0.347046	3.69156e-05	0.0438988	chr7	56062794	OpenSea	Body	NM_001202469	GBAS	2631	ENSG00000146729
cg09933458	0.31912	4.06157e-06	0.0245587	chr13	112063695	Island
cg17197021	0.315951	2.82394e-05	0.0411722	chr9	98741935	OpenSea	Body	NM_020207	ERCC6L2	375748	ENSG00000182150
cg13885120	0.314178	2.9238e-05	0.0416469	chr9	137538776	OpenSea	Body	NM_000093	COL5A1	1289	ENSG00000130635
cg14085080	0.31004	3.80737e-05	0.0438988	chr6	106565546	OpenSea
cg01189615	0.306797	2.00148e-05	0.037241	chr1	116930779	OpenSea	Body	NM_001160233	ATP1A1	476	ENSG00000163399
cg01189615	0.306797	2.00148e-05	0.037241	chr1	116930779	OpenSea	Body	NM_001160234	ATP1A1	476	ENSG00000163399
cg01189615	0.306797	2.00148e-05	0.037241	chr1	116930779	OpenSea	Body	NM_000701	ATP1A1	476	ENSG00000163399
cg01340659	0.291232	9.05653e-05	0.0517394	chr17	3637961	OpenSea	Body	NM_002208	ITGAE	3682	ENSG00000083457
cg00178897	0.290386	1.87166e-05	0.0367631	chr2	175208588	Island
cg21254171	0.28228	9.62198e-05	0.0521905	chr4	78783977	Island	5'UTR	NM_020236	MRPL1	65008	ENSG00000169288
cg21254171	0.28228	9.62198e-05	0.0521905	chr4	78783977	Island	1stExon	NM_020236	MRPL1	65008	ENSG00000169288
cg05437648	0.264977	8.60778e-05	0.0517394	chr3	43778670	OpenSea
cg13490827	0.25194	9.95172e-05	0.0521905	chr1	46269305	Island	1stExon	NM_015112	MAST2	23139	ENSG00000086015
cg13490827	0.25194	9.95172e-05	0.0521905	chr1	46269305	Island	5'UTR	NM_015112	MAST2	23139	ENSG00000086015
cg02605232	0.241326	3.12171e-05	0.0427743	chr16	72967269	OpenSea	Body	NM_001164766	ZFHX3	463	ENSG00000140836
cg02605232	0.241326	3.12171e-05	0.0427743	chr16	72967269	OpenSea	Body	NM_006885	ZFHX3	463	ENSG00000140836
cg04326643	0.241091	2.61864e-05	0.0402569	chr18	66324884	OpenSea
cg11336061	0.237299	1.71805e-06	0.0238167	chr1	25254149	N_Shore	Body	NM_004350	RUNX3	864	ENSG00000020633
cg24157892	0.236503	2.31519e-05	0.0385709	chr17	59473707	Island
cg17619570	0.231874	2.48717e-05	0.0395868	chr9	93308791	OpenSea	Body	NR_034157	LINC01501	340515
cg21293871	0.21109	5.95441e-05	0.0492043	chr21	46175037	OpenSea
cg13106389	0.202287	8.71683e-05	0.0517394	chr1	25257626	Island	TSS1500	NM_004350	RUNX3	864	ENSG00000020633
cg13106389	0.202287	8.71683e-05	0.0517394	chr1	25257626	Island	Body	NM_001031680	RUNX3	864	ENSG00000020633
cg12453154	0.199229	5.05214e-05	0.0460669	chr13	39925024	OpenSea	Body	NM_005780	LHFP	10186	ENSG00000183722
cg10281002	0.189848	8.85899e-05	0.0517394	chr12	114846399	Island	TSS200	NM_080717	TBX5	6910	ENSG00000089225
cg10281002	0.189848	8.85899e-05	0.0517394	chr12	114846399	Island	TSS200	NM_000192	TBX5	6910	ENSG00000089225
cg02295872	0.186853	6.47226e-05	0.0499283	chr1	228131977	N_Shelf	Body	NM_003395	WNT9A	7483	ENSG00000143816
cg16529229	0.175721	1.3047e-05	0.0336021	chr6	33180402	N_Shore	3'UTR	NM_002931	RING1	6015	ENSG00000204227
cg16529229	0.175721	1.3047e-05	0.0336021	chr6	33180402	N_Shore	3'UTR	NM_002931	RING1	6015	ENSG00000228520
cg16529229	0.175721	1.3047e-05	0.0336021	chr6	33180402	N_Shore	3'UTR	NM_002931	RING1	6015	ENSG00000235107
cg16529229	0.175721	1.3047e-05	0.0336021	chr6	33180402	N_Shore	3'UTR	NM_002931	RING1	6015	ENSG00000226788
cg16529229	0.175721	1.3047e-05	0.0336021	chr6	33180402	N_Shore	3'UTR	NM_002931	RING1	6015	ENSG00000206287
cg16529229	0.175721	1.3047e-05	0.0336021	chr6	33180402	N_Shore	3'UTR	NM_002931	RING1	6015	ENSG00000231115
cg01892452	0.173752	3.66264e-05	0.0438988	chr1	86527360	OpenSea	Body	NM_152890	COL24A1	255631	ENSG00000171502
cg13230640	0.158449	3.90402e-05	0.044119	chr3	117630266	OpenSea
cg24192157	0.152962	8.16522e-05	0.0514828	chr6	106194673	OpenSea
cg23934731	0.150619	5.34659e-05	0.0470501	chr15	89904873	Island
cg05891572	0.150243	3.05326e-05	0.0424127	chr7	33462512	OpenSea	Body	NM_001033604	BBS9	27241	ENSG00000122507
cg05891572	0.150243	3.05326e-05	0.0424127	chr7	33462512	OpenSea	Body	NM_014451	BBS9	27241	ENSG00000122507
cg05891572	0.150243	3.05326e-05	0.0424127	chr7	33462512	OpenSea	Body	NM_198428	BBS9	27241	ENSG00000122507
cg05891572	0.150243	3.05326e-05	0.0424127	chr7	33462512	OpenSea	Body	NM_001033605	BBS9	27241	ENSG00000122507
cg12205593	0.14542	6.42467e-05	0.0499283	chr7	98093013	OpenSea
cg10282345	0.145057	7.72511e-05	0.0514828	chr14	75745684	Island	1stExon	NM_005252	FOS	2353	ENSG00000170345
cg10282345	0.145057	7.72511e-05	0.0514828	chr14	75745684	Island	5'UTR	NM_005252	FOS	2353	ENSG00000170345
cg23229261	0.139804	3.18223e-05	0.0431348	chr2	63284066	Island	3'UTR	NM_014562	OTX1	5013	ENSG00000115507
cg00232450	0.118592	1.06659e-05	0.0323778	chr7	80421169	OpenSea	Body	NM_006379	SEMA3C	10512	ENSG00000075223
cg11828163	0.110742	4.35e-05	0.0455587	chr7	5531009	N_Shelf	Body	NM_024963	FBXL18	80028	ENSG00000155034
cg06982033	0.110697	4.2359e-05	0.0450869	chr8	41292791	OpenSea
cg23859303	0.0986567	2.75754e-05	0.0411722	chr7	158243632	OpenSea	Body	NM_002847	PTPRN2	5799	ENSG00000155093
cg23859303	0.0986567	2.75754e-05	0.0411722	chr7	158243632	OpenSea	Body	NM_002847	PTPRN2	5799	ENSG00000282185
cg23859303	0.0986567	2.75754e-05	0.0411722	chr7	158243632	OpenSea	Body	NM_130842	PTPRN2	5799	ENSG00000155093
cg23859303	0.0986567	2.75754e-05	0.0411722	chr7	158243632	OpenSea	Body	NM_130842	PTPRN2	5799	ENSG00000282185
cg23859303	0.0986567	2.75754e-05	0.0411722	chr7	158243632	OpenSea	Body	NM_130843	PTPRN2	5799	ENSG00000155093
cg23859303	0.0986567	2.75754e-05	0.0411722	chr7	158243632	OpenSea	Body	NM_130843	PTPRN2	5799	ENSG00000282185
cg02009648	0.086011	8.16483e-05	0.0514828	chr6	44090983	N_Shelf	5'UTR	NM_032111	MRPL14	64928	ENSG00000180992
cg02509576	0.0795919	8.96985e-06	0.0305952	chr2	68053187	OpenSea	TSS1500	NR_110271	LOC101927701	101927701	ENSG00000237013
cg16158905	0.0747614	8.98881e-05	0.0517394	chr7	114429409	OpenSea
cg27631718	0.0746117	8.06146e-05	0.0514828	chr21	37376894	OpenSea	TSS1500	NR_110419	LINC01436	100996609
cg27631718	0.0746117	8.06146e-05	0.0514828	chr21	37376894	OpenSea	Body	NR_110418	LOC101928269	101928269
cg26196480	0.069525	6.27676e-05	0.0499283	chr12	114846347	Island	TSS200	NM_080717	TBX5	6910	ENSG00000089225
cg26196480	0.069525	6.27676e-05	0.0499283	chr12	114846347	Island	TSS200	NM_000192	TBX5	6910	ENSG00000089225
cg23987444	0.0650373	6.86197e-05	0.0504796	chr10	50817810	Island	TSS1500	NM_003055	SLC18A3	6572	ENSG00000187714
cg23987444	0.0650373	6.86197e-05	0.0504796	chr10	50817810	Island	5'UTR	NM_020984	CHAT	1103	ENSG00000070748
cg06490868	0.0514842	4.12532e-05	0.0447917	chr10	79725233	OpenSea
cg05857996	0.0509317	9.13325e-05	0.0517394	chr20	2675418	S_Shore	Body	NM_001110514	EBF4	57593	ENSG00000088881
cg00347729	0.0506622	7.40688e-05	0.0514369	chr11	102651753	OpenSea	TSS1500	NM_002425	MMP10	4319	ENSG00000166670
cg21936789	0.0495643	7.16976e-06	0.0285213	chr3	47620545	Island	TSS200	NM_006574	CSPG5	10675	ENSG00000114646
cg11230255	0.0472655	8.86499e-05	0.0517394	chr1	145067477	OpenSea	Body	NM_022359	PDE4DIP	9659	ENSG00000178104
cg11230255	0.0472655	8.86499e-05	0.0517394	chr1	145067477	OpenSea	Body	NM_001278267	NBPF20	100288142	ENSG00000162825
cg11230255	0.0472655	8.86499e-05	0.0517394	chr1	145067477	OpenSea	Body	NM_001277444	NBPF9	400818	ENSG00000269713
cg03769939	0.0446259	1.2548e-05	0.0331268	chr1	25254129	N_Shore	Body	NM_001031680	RUNX3	864	ENSG00000020633
cg03769939	0.0446259	1.2548e-05	0.0331268	chr1	25254129	N_Shore	Body	NM_004350	RUNX3	864	ENSG00000020633
cg14177960	0.0378599	3.76136e-05	0.0438988	chr1	224433148	OpenSea	Body	NM_001243146	NVL	4931	ENSG00000143748
cg14177960	0.0378599	3.76136e-05	0.0438988	chr1	224433148	OpenSea	Body	NM_206840	NVL	4931	ENSG00000143748
cg14177960	0.0378599	3.76136e-05	0.0438988	chr1	224433148	OpenSea	Body	NM_002533	NVL	4931	ENSG00000143748
cg14177960	0.0378599	3.76136e-05	0.0438988	chr1	224433148	OpenSea	Body	NM_001243147	NVL	4931	ENSG00000143748
cg27193704	0.0305218	2.87668e-05	0.0412085	chr6	33589172	Island	5'UTR	NM_002224	ITPR3	3710	ENSG00000096433
cg27193704	0.0305218	2.87668e-05	0.0412085	chr6	33589172	Island	1stExon	NM_002224	ITPR3	3710	ENSG00000096433
cg21278980	0.0302429	8.48866e-05	0.0516949	chr8	17624082	OpenSea	5'UTR	NM_001001924	MTUS1	57509	ENSG00000129422
cg21278980	0.0302429	8.48866e-05	0.0516949	chr8	17624082	OpenSea	5'UTR	NM_001001925	MTUS1	57509	ENSG00000129422
cg05617790	0.0101316	1.7597e-05	0.036666	chr12	10322100	OpenSea	Body	NM_002543	OLR1	4973	ENSG00000173391
cg05617790	0.0101316	1.7597e-05	0.036666	chr12	10322100	OpenSea	Body	NM_001172632	OLR1	4973	ENSG00000173391
cg05617790	0.0101316	1.7597e-05	0.036666	chr12	10322100	OpenSea	Body	NM_001172633	OLR1	4973	ENSG00000173391
cg05617790	0.0101316	1.7597e-05	0.036666	chr12	10322100	OpenSea	TSS1500	NM_001079815	TMEM52B	120939	ENSG00000165685
cg14862395	0.00655183	1.24549e-05	0.0330624	chr20	44879700	Island	1stExon	NM_021248	CDH22	64405	ENSG00000149654
cg22532580	0.00526258	1.23264e-05	0.0330612	chr3	19943166	OpenSea	Body	NM_144715	EFHB	151651	ENSG00000163576
